# Supplementary material for: Substrate scope driven optimization of an encapsulated hydroformylation catalyst
Source: Royal Society of Chemistry journal article supplement (doi:10.1039/d4cy00051j), 2024-01-01
Supplement: d4cy00051j1.pdf [file d4cy00051j1.pdf]

Supporting Info

## A Substrate Scope Driven Optimization of an Encapsulated Hydroformylation Catalyst

Pim R. Linnebank,<sup>a</sup> Alexander M. Kluwer<sup>b</sup> and Joost N. H. Reek<sup>\*a,b</sup>

### General comments

Reactions were carried out under N<sub>2</sub> atmosphere using standard Schlenk techniques. THF, pentane, hexane and diethyl ether were distilled from sodium benzophenone ketyl under nitrogen; CH<sub>2</sub>Cl<sub>2</sub>, methanol and Et<sub>3</sub>N were distilled from CaH<sub>2</sub> under nitrogen and toluene was distilled from sodium under nitrogen. NMR spectra were measured on a Bruker DRX 300 or a Bruker AMX 400. Measurements were done at room temperature (rt) unless otherwise stated. High resolution mass spectrometry was carried out using the AccuTOF GC v 4g, JMS-T100GCV mass spectrometer (JEOL, Japan).

### Experimental details

The hydroformylation experiments were carried out in a stainless steel autoclave (volume 150 ml) charged with an insert suitable for 15 reaction vessels (including Teflon mini stirring bars) for conducting parallel reactions. The substrates were filtered over basic alumina to remove possible peroxide impurities. The solvent toluene was distilled from sodium prior to use. GC vials were charged with 0.35 μmol of [Rh(acac)(CO)<sub>2</sub>], 3.2 μmol of phosphine, (if necessary) 9.6 μmol of zinc(II) tetraphenylporphyrin or the analog, 368 μmol of substrate and a known amount of 1,3,5 trimethoxybenzene in 0.50 ml of toluene. The autoclave was charged purged three times with 20 bar syngas (H<sub>2</sub>:CO, 1:1) after which the autoclave was pressurized to 20 bar of syngas and the Teflon stirring bars were stirred vigorously for 48 hrs at 25°C. After 48 hrs the pressure was carefully released and ~0,05 ml of the reaction mixture was taken and diluted with 0,4 ml CDCl<sub>3</sub> for NMR analysis. Simultaneously ~0,03 ml of the reaction mixtures were diluted with dichloromethane for GC-analysis. GC-MS and GC-FID measurements were conducted on a Shimadzu GC-2010 Plus Capillary GC-MS containing a splitter to an MS detector and an FID detector with a SH-Rtx-5 Amine column of 30 m x 0,25 mm, df 0.25. All reaction mixtures were separated by diluting the reaction mixture and injecting reaction mixtures at 50°C after which the temperature was increased at 10°C/min up to 300°C. The oven was kept at 300°C for 5 minutes. This method was applied to all reaction mixtures tested and gave successful separation for all the reaction mixtures.

**Note:** for the branched products of 4- and 3- methyl hexene two different diastereoisomers are possible, which are also observed in the GC and <sup>1</sup>H-NMR spectra in nearly equal amounts. The integrals of the two peaks were combined and reported together as the branched product.

## Catalytic results

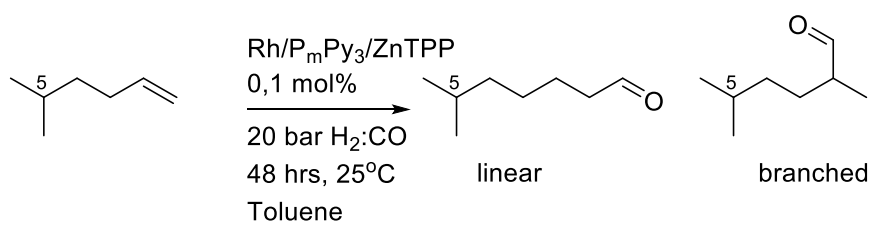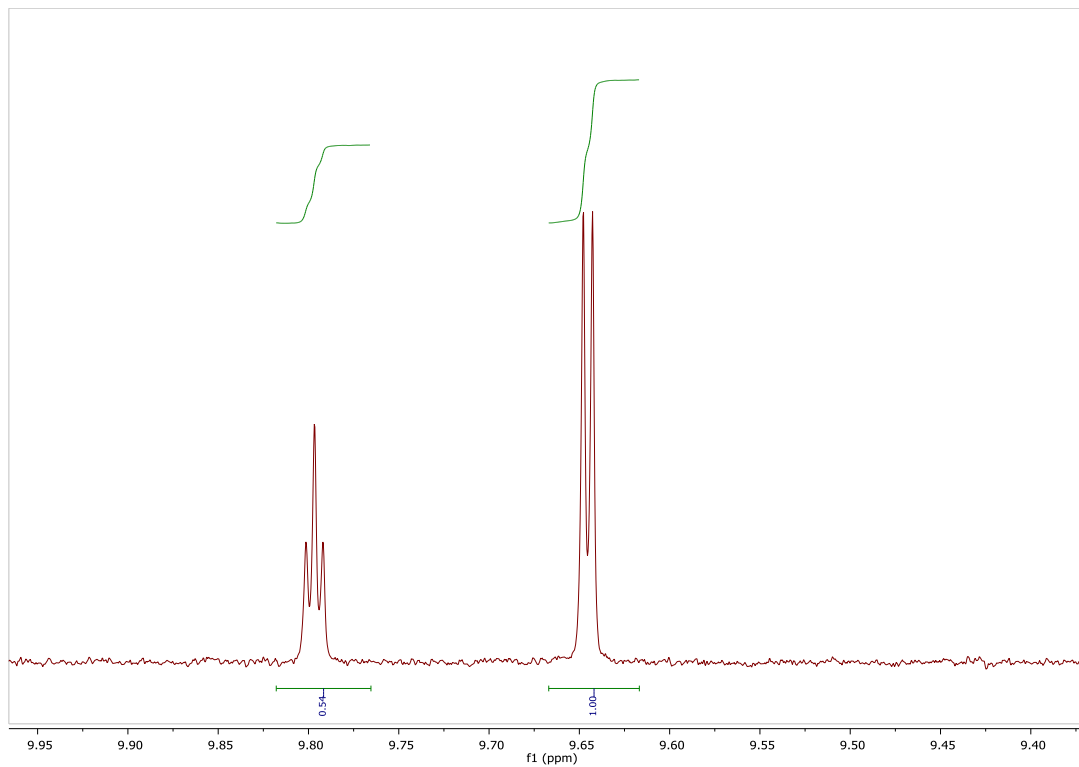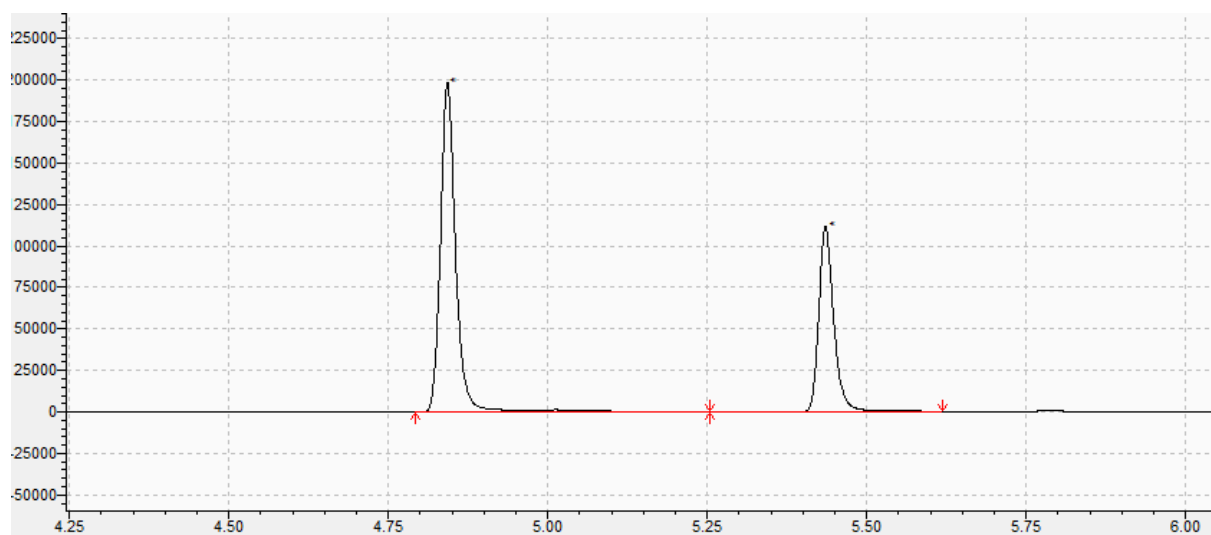

| Retention time | Area   |          | I/b ratio |
|----------------|--------|----------|-----------|
| 4,843          | 327033 | Branched | 0.55      |
| 5,436          | 180465 | Linear   |           |

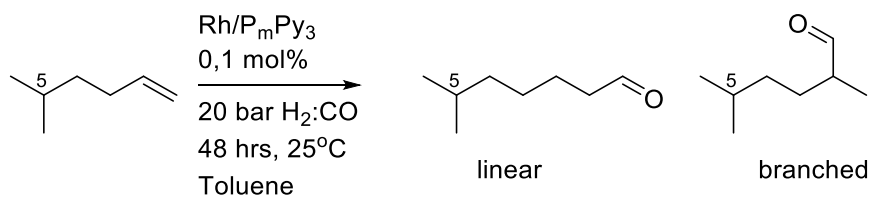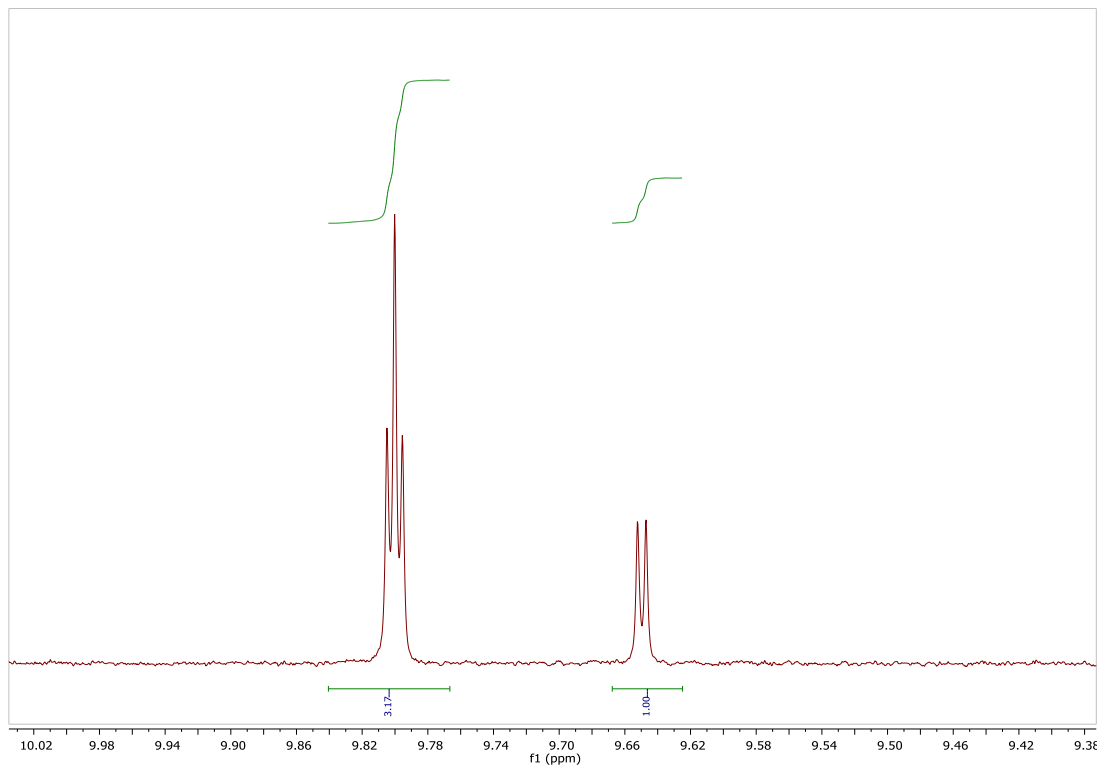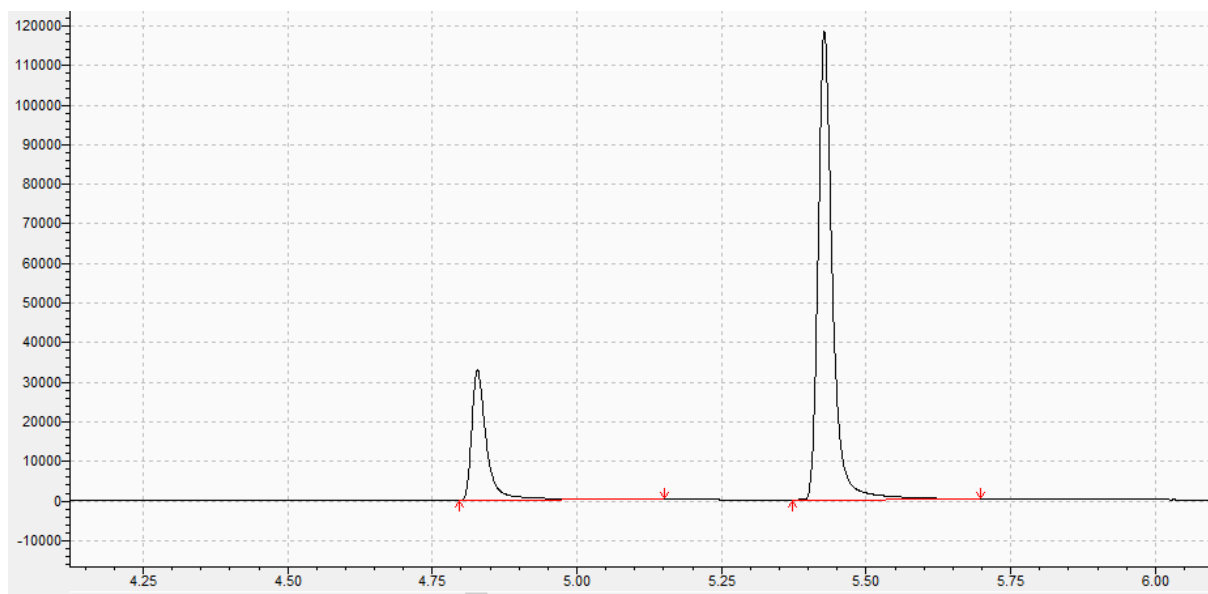

| Retention time | Area   |          | l/b ratio |
|----------------|--------|----------|-----------|
| 4,828          | 60055  | Branched | 3.44      |
| 5,428          | 207017 | Linear   |           |

**Note:** For the branched products of 4-methyl hexene two different branched diastereoisomers are possible, which are also observed in the GC and <sup>1</sup>H-NMR spectra in nearly equal amounts. No alkene isomerization was observed, which excludes an isomerization/hydroformylation sequence. The integrals of the two peaks were combined and reported together as the branched product.

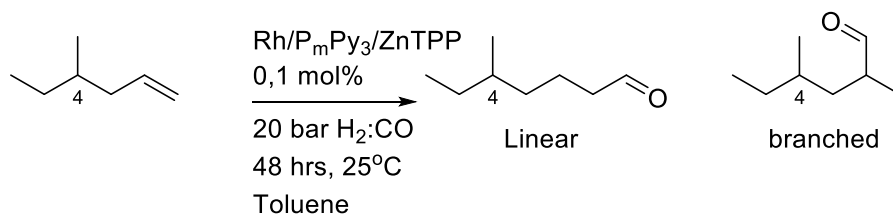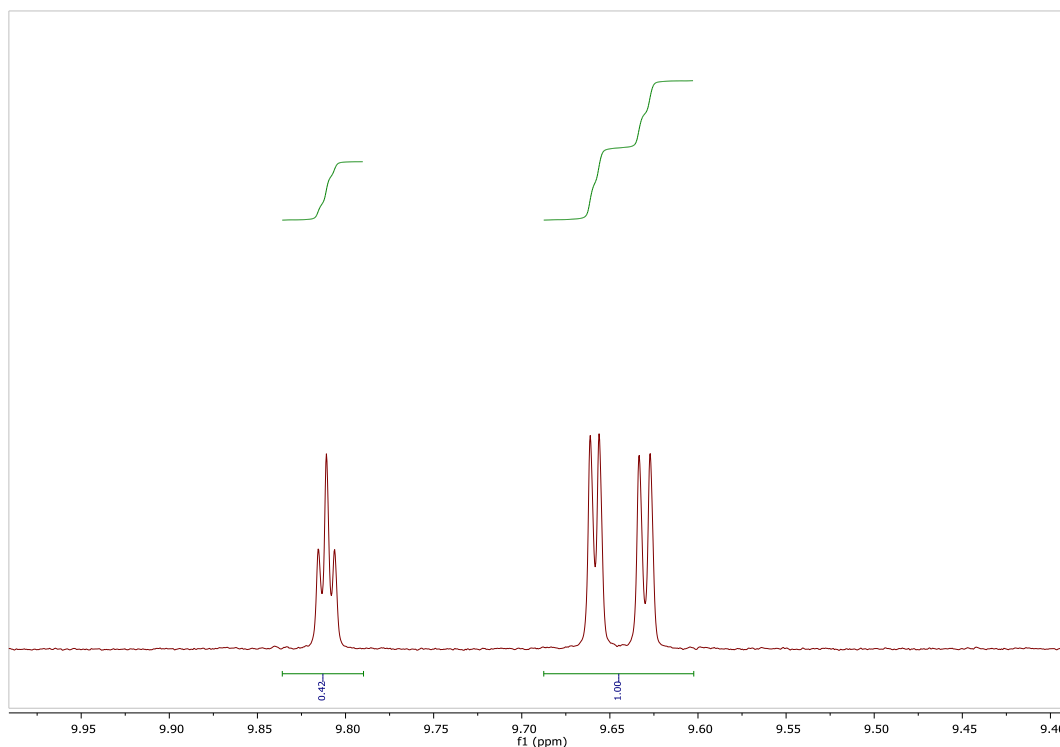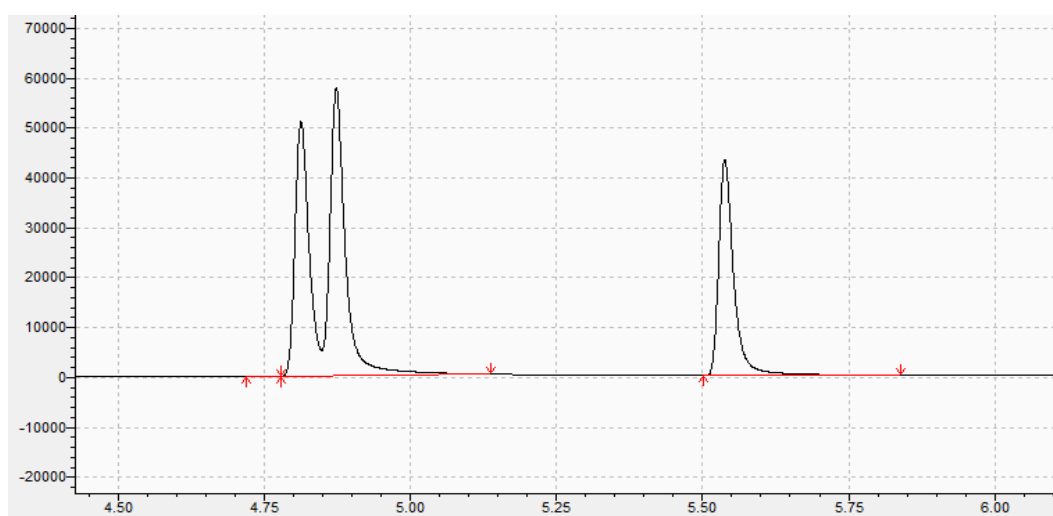

| Retention time | Area   |          | I/b ratio |
|----------------|--------|----------|-----------|
| 4,874          | 190671 | branched | 0,41      |

|       |       |        |  |
|-------|-------|--------|--|
| 5,538 | 78073 | linear |  |
|-------|-------|--------|--|

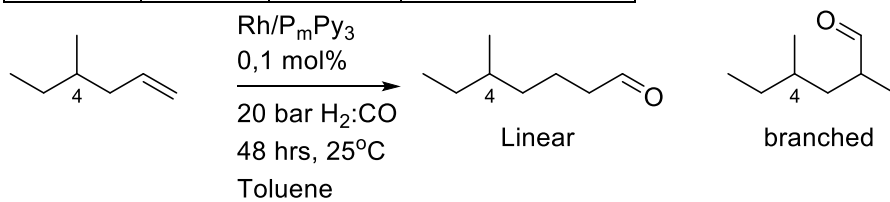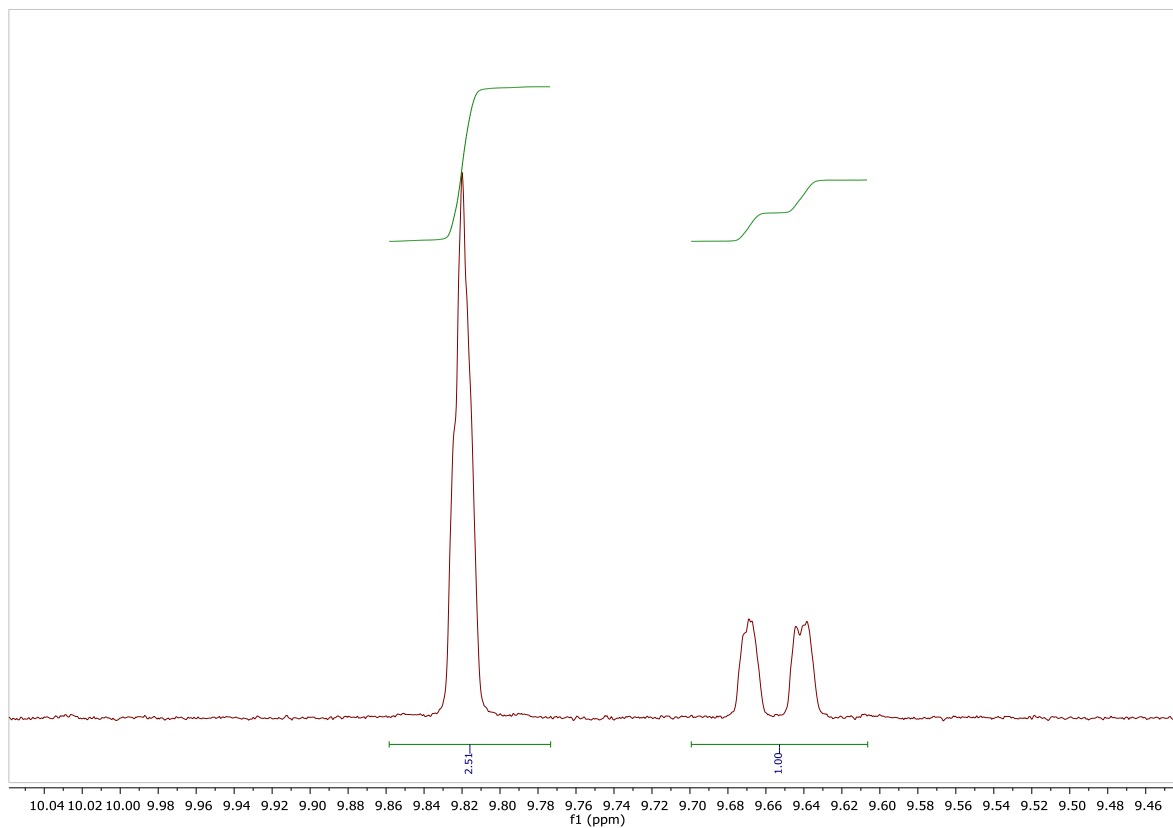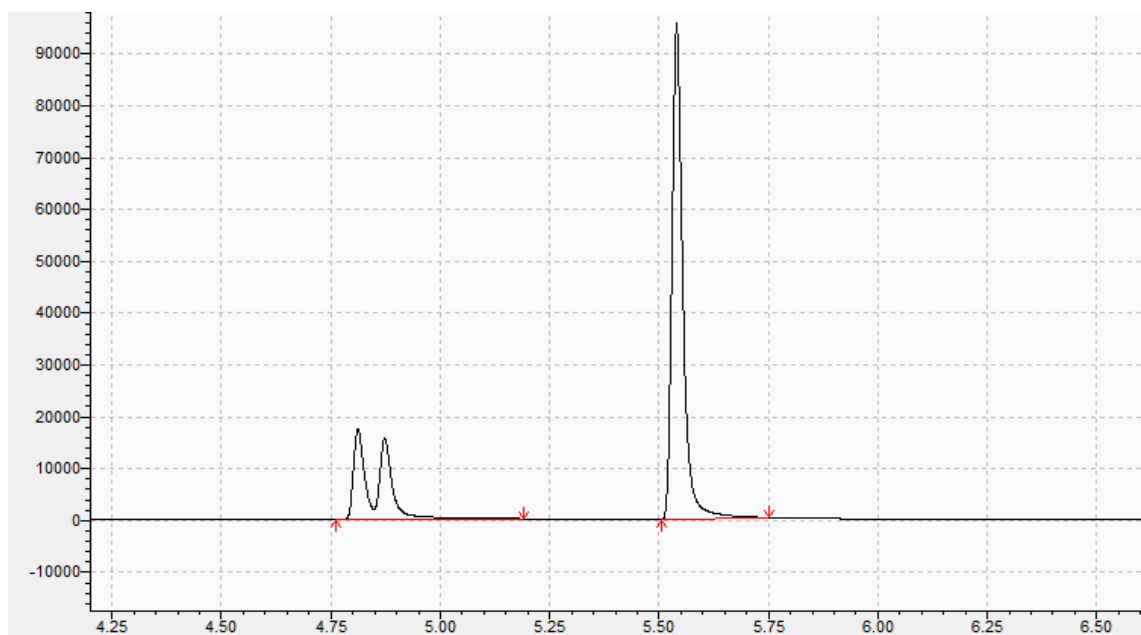

| Retention time | Area  |          | I/b ratio |
|----------------|-------|----------|-----------|
| 4,812          | 61821 | Branched | 2,68      |

|      |        |        |  |
|------|--------|--------|--|
| 5,54 | 165445 | Linear |  |
|------|--------|--------|--|

**Note:** For the branched products of 3- methyl hexene two different branched diastereoisomers are possible, which are also observed in the GC and <sup>1</sup>H-NMR spectra in nearly equal amounts. No alkene isomerization was observed, which excludes an isomerization/hydroformylation sequence. The integrals of the two peaks were combined and reported together as the branched product.

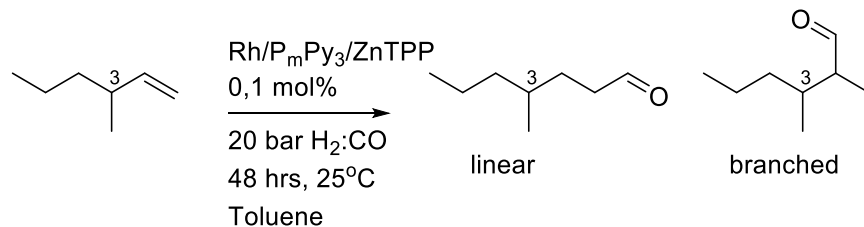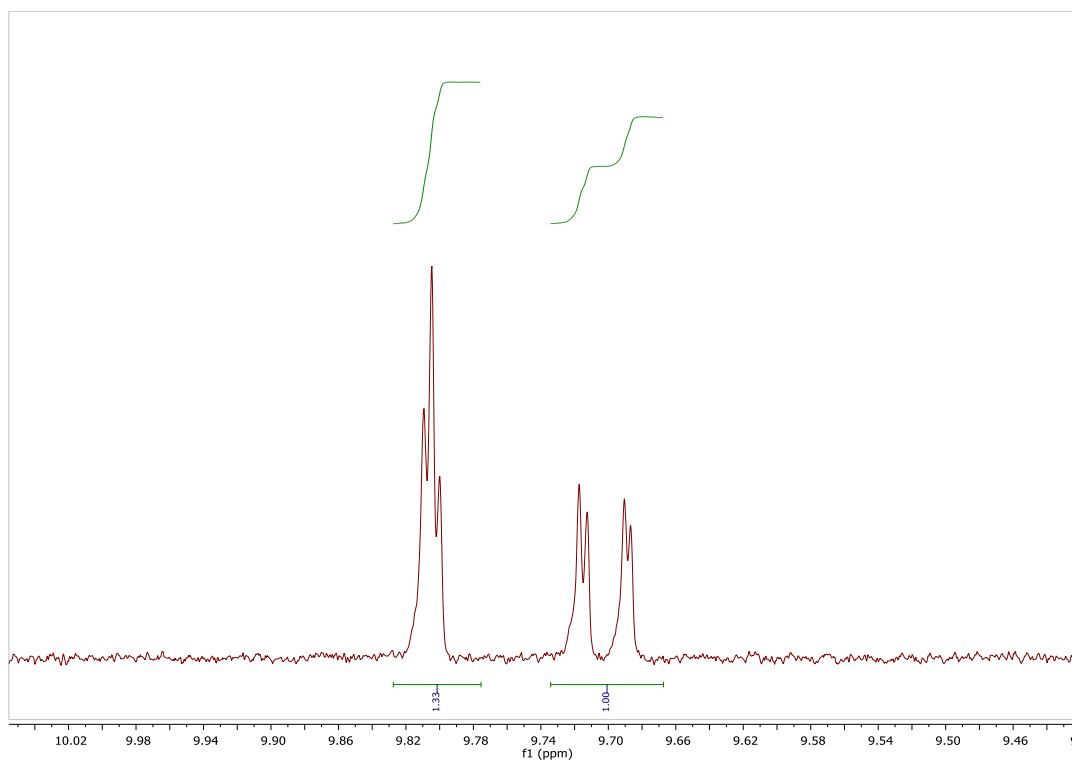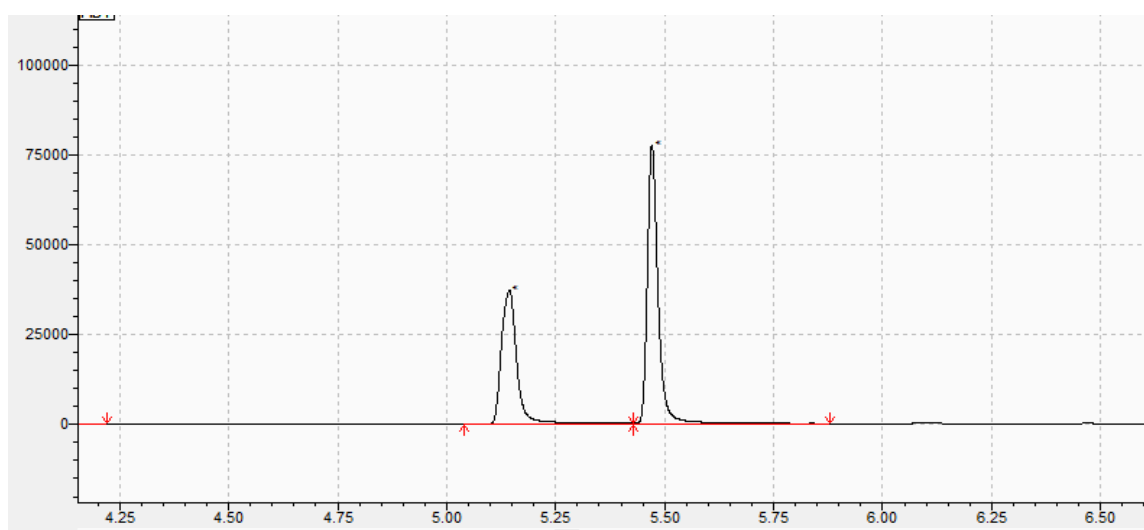

| Time | Area | I/b ratio |
|------|------|-----------|
|------|------|-----------|

|       |        |          |       |
|-------|--------|----------|-------|
| 8,317 | 760155 | Branched | 0.408 |
| 9,185 | 310593 | Linear   |       |

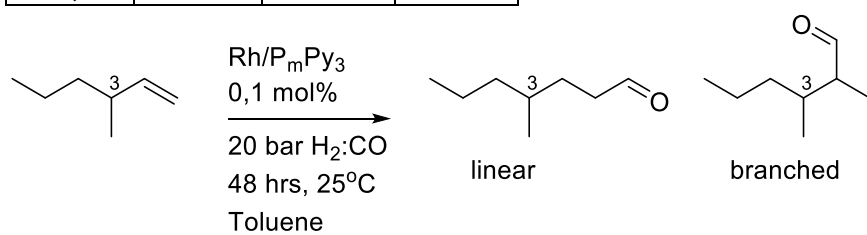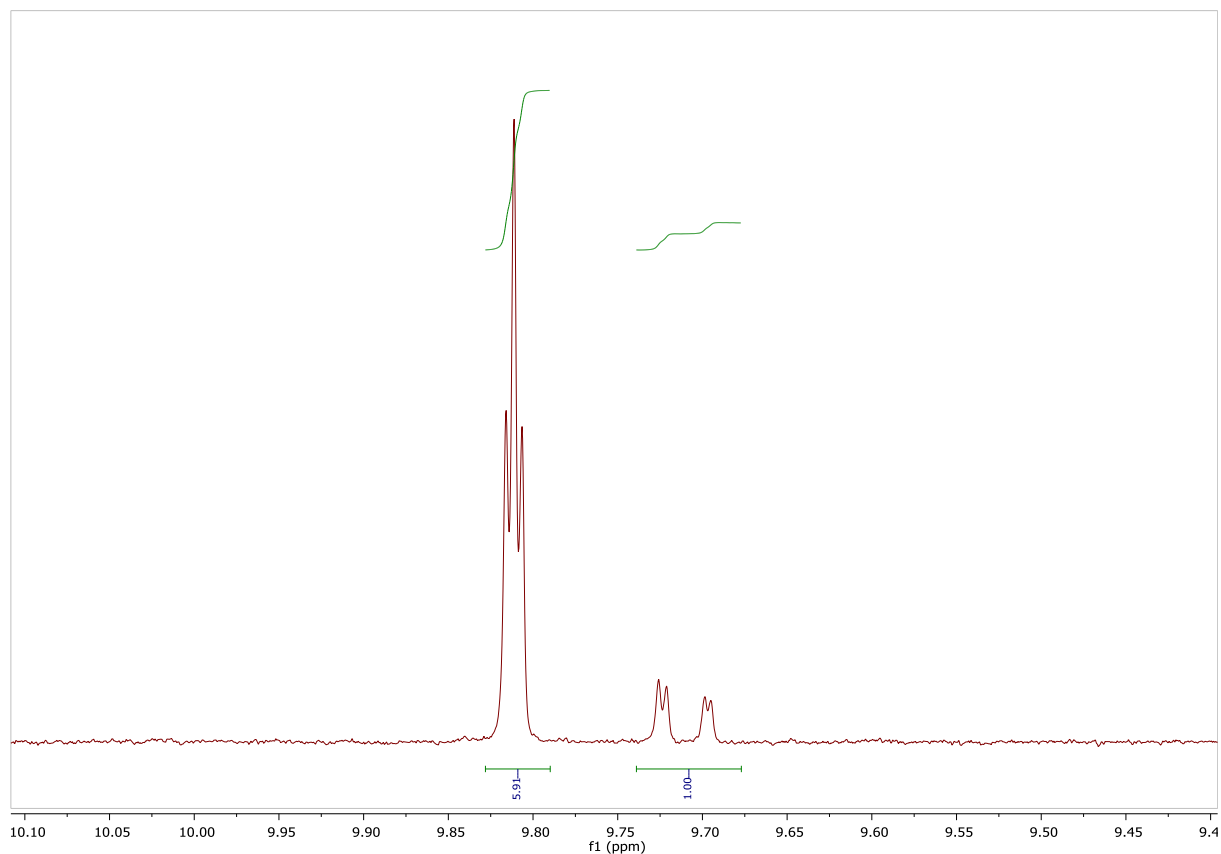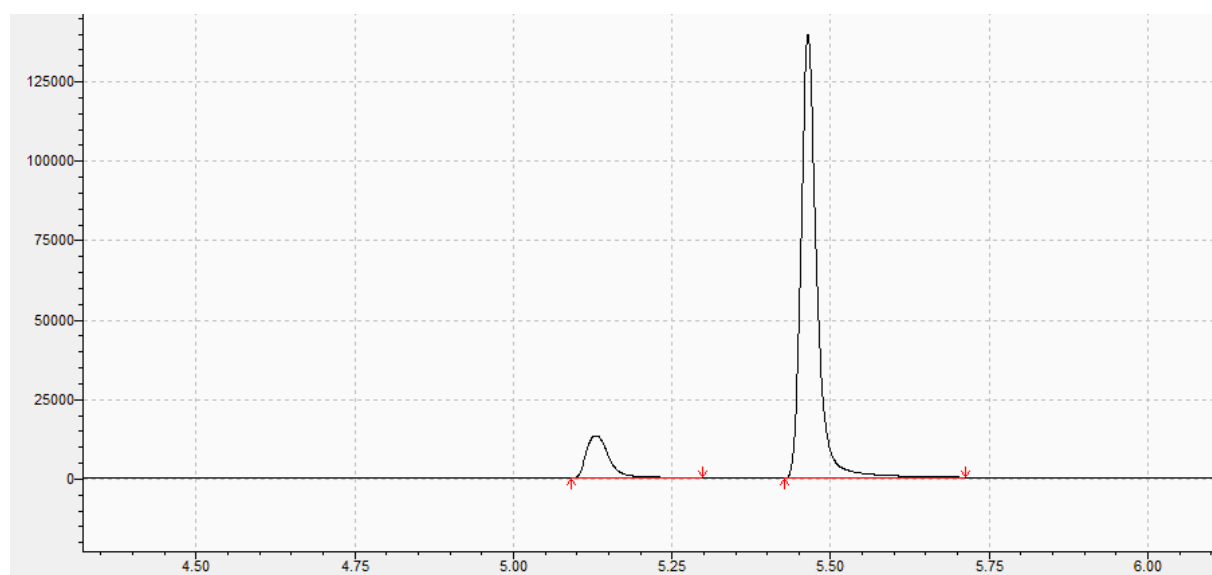

| Time | Area | I/b ratio |
|------|------|-----------|
|------|------|-----------|

|       |        |          |      |
|-------|--------|----------|------|
| 5,13  | 33902  | Branched | 7,10 |
| 5,464 | 240696 | Linear   |      |

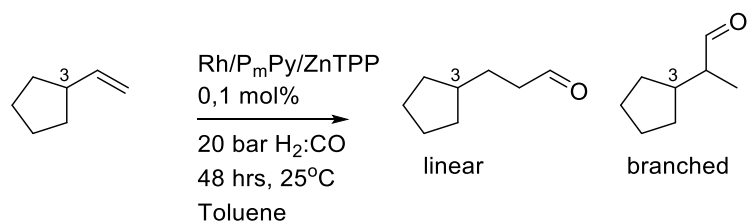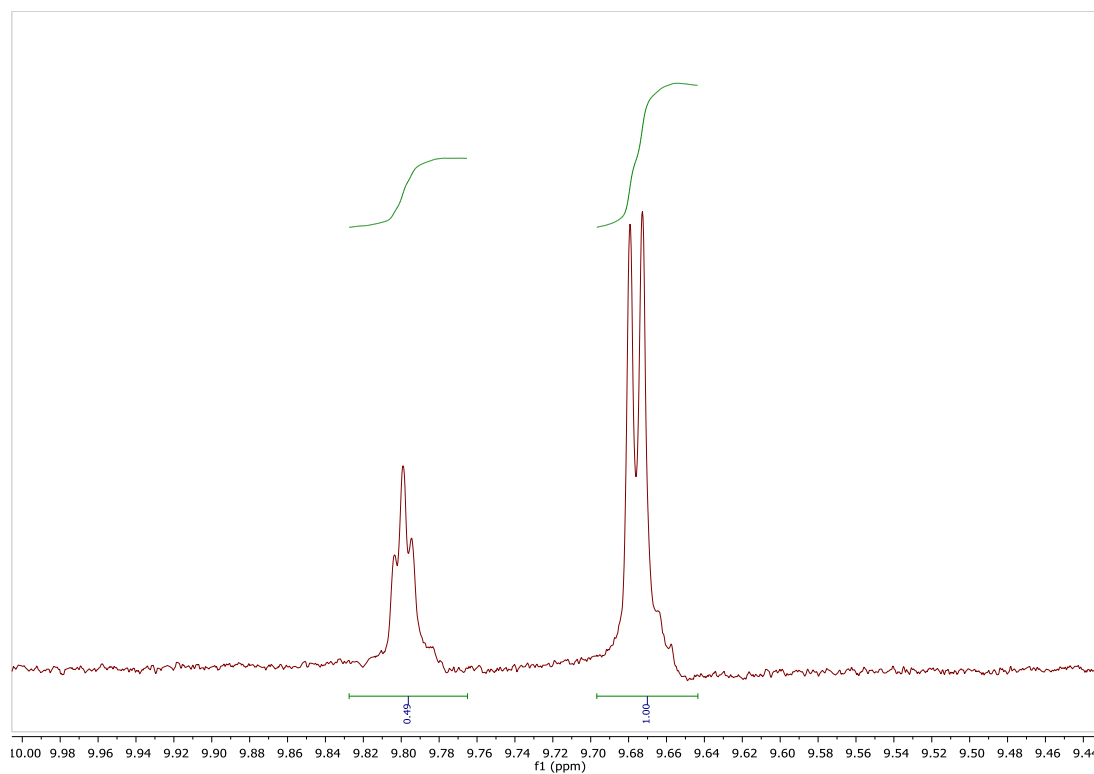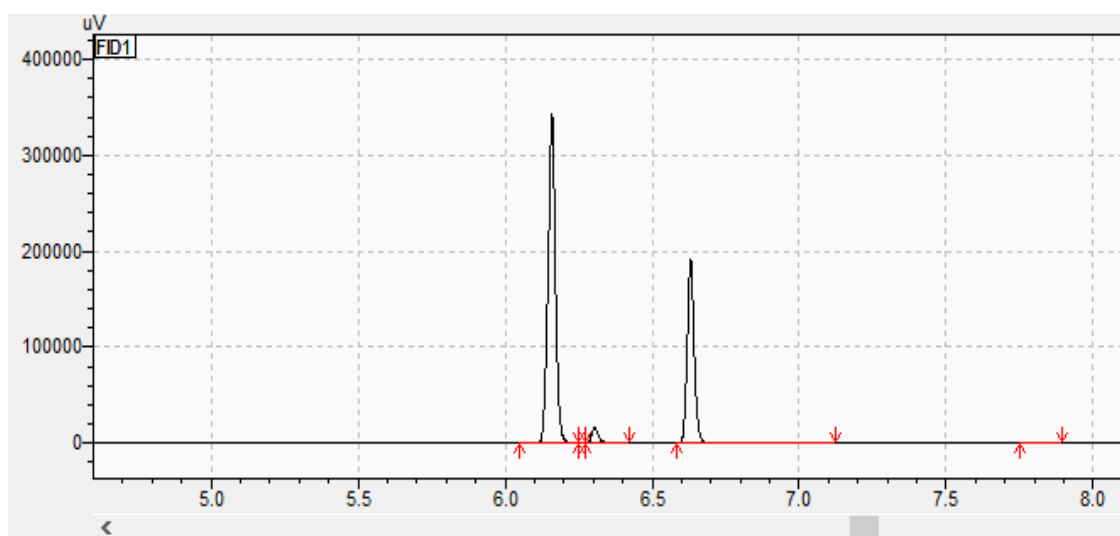

| Time | Area | I/b ratio |
|------|------|-----------|
|------|------|-----------|



|       |        |          |      |
|-------|--------|----------|------|
| 6,159 | 594020 | Branched | 0,50 |
| 6,631 | 311345 | Linear   |      |

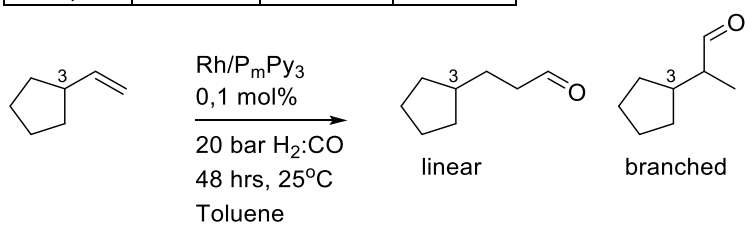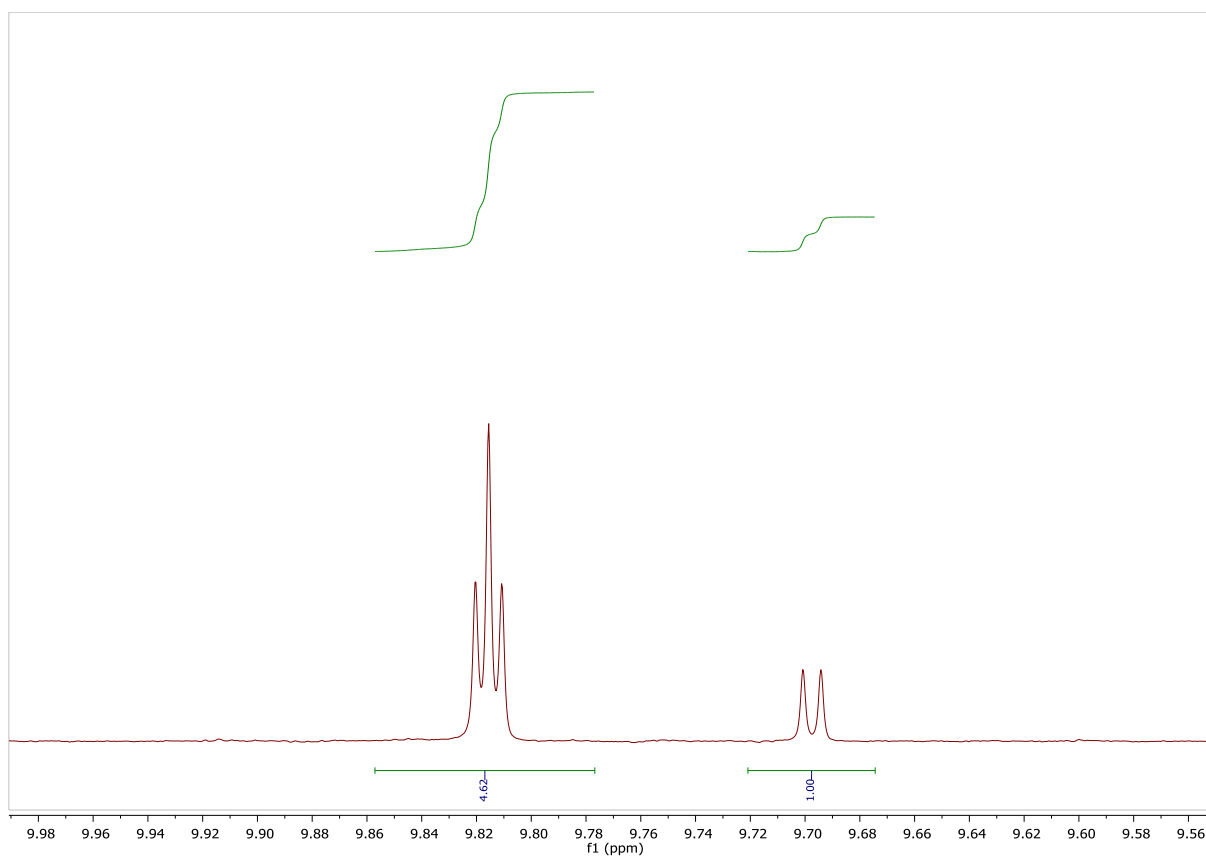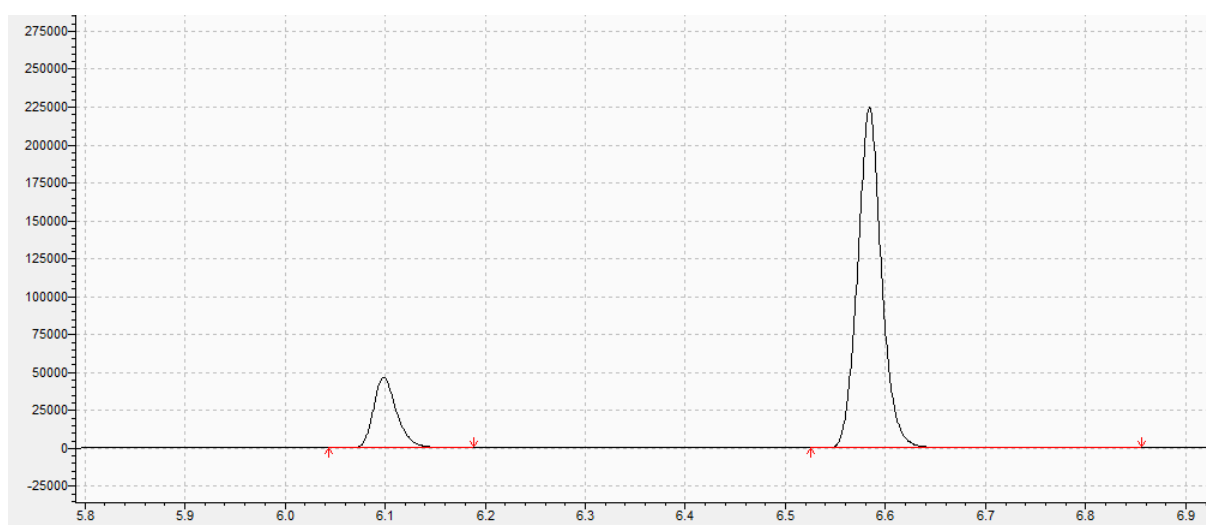

| Time  | Area  |          | l/b ratio |
|-------|-------|----------|-----------|
| 6,159 | 32421 | Branched | 5.31      |

|       |        |        |  |
|-------|--------|--------|--|
| 6,631 | 172425 | Linear |  |
|-------|--------|--------|--|

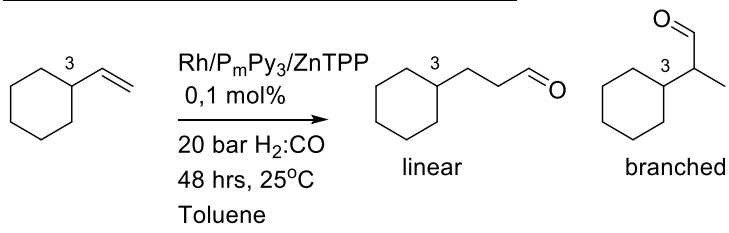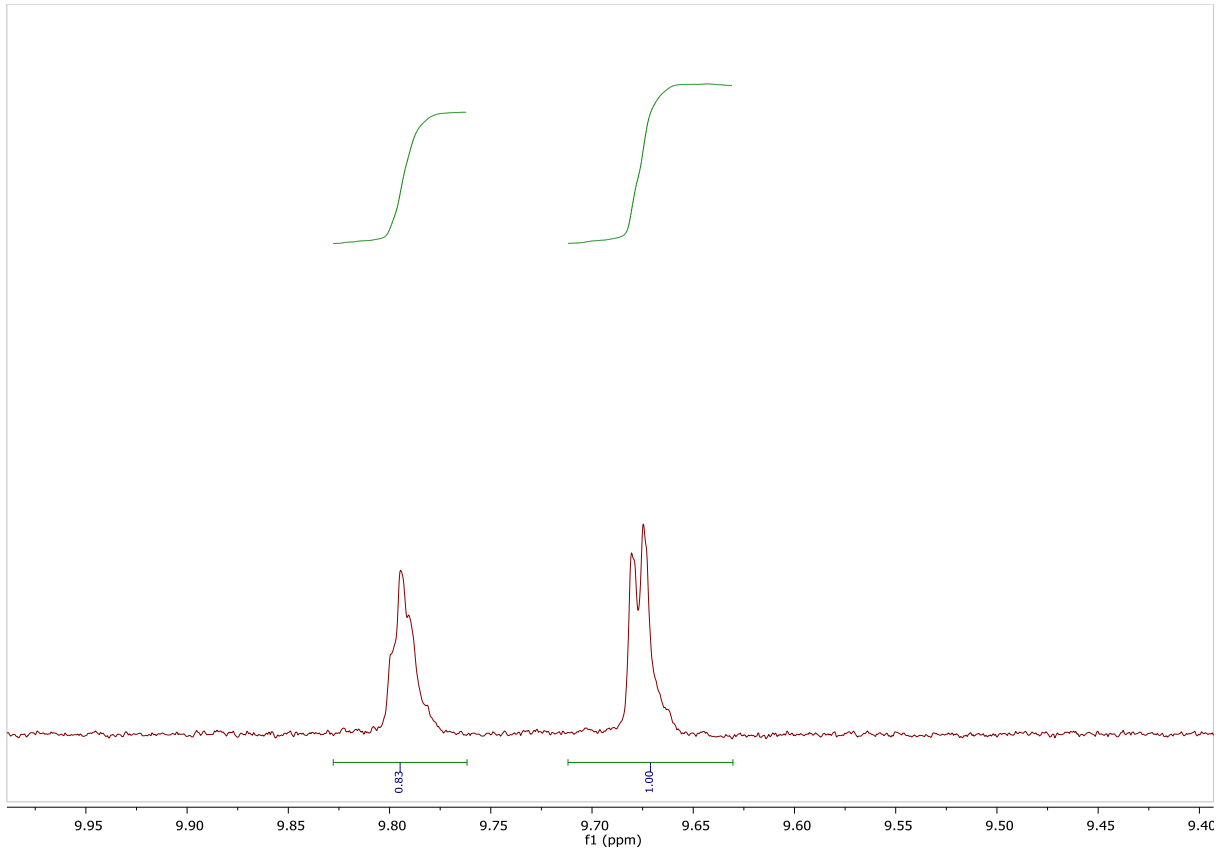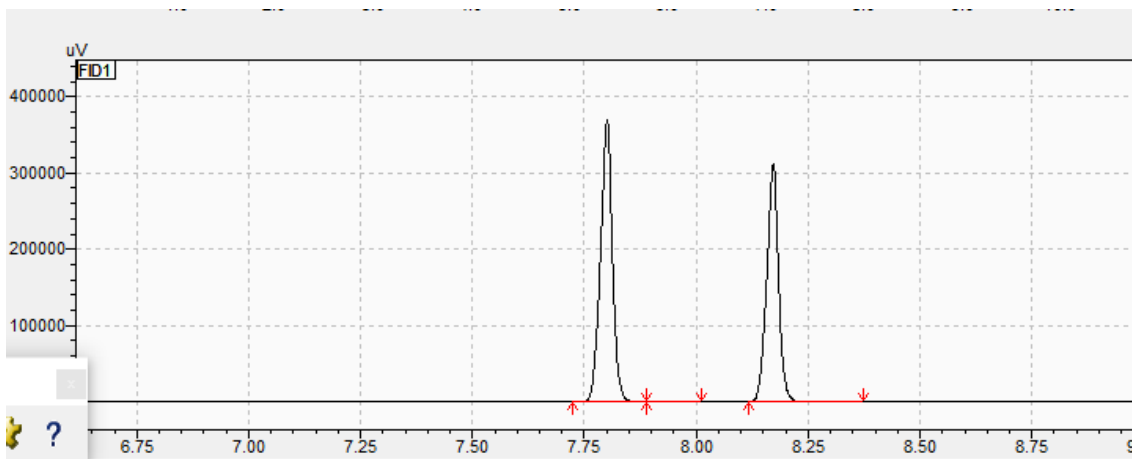

| Retention time | Area   |          | I/b ratio |
|----------------|--------|----------|-----------|
| 7,869          | 682471 | branched | 0,84      |
| 8,172          | 570411 |          |           |

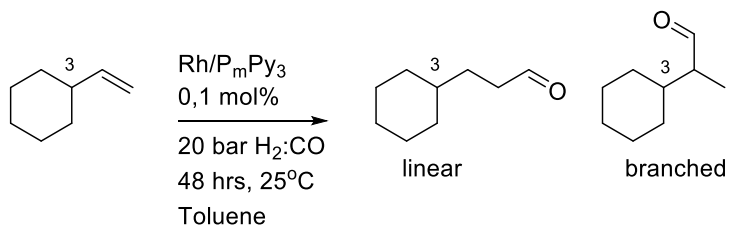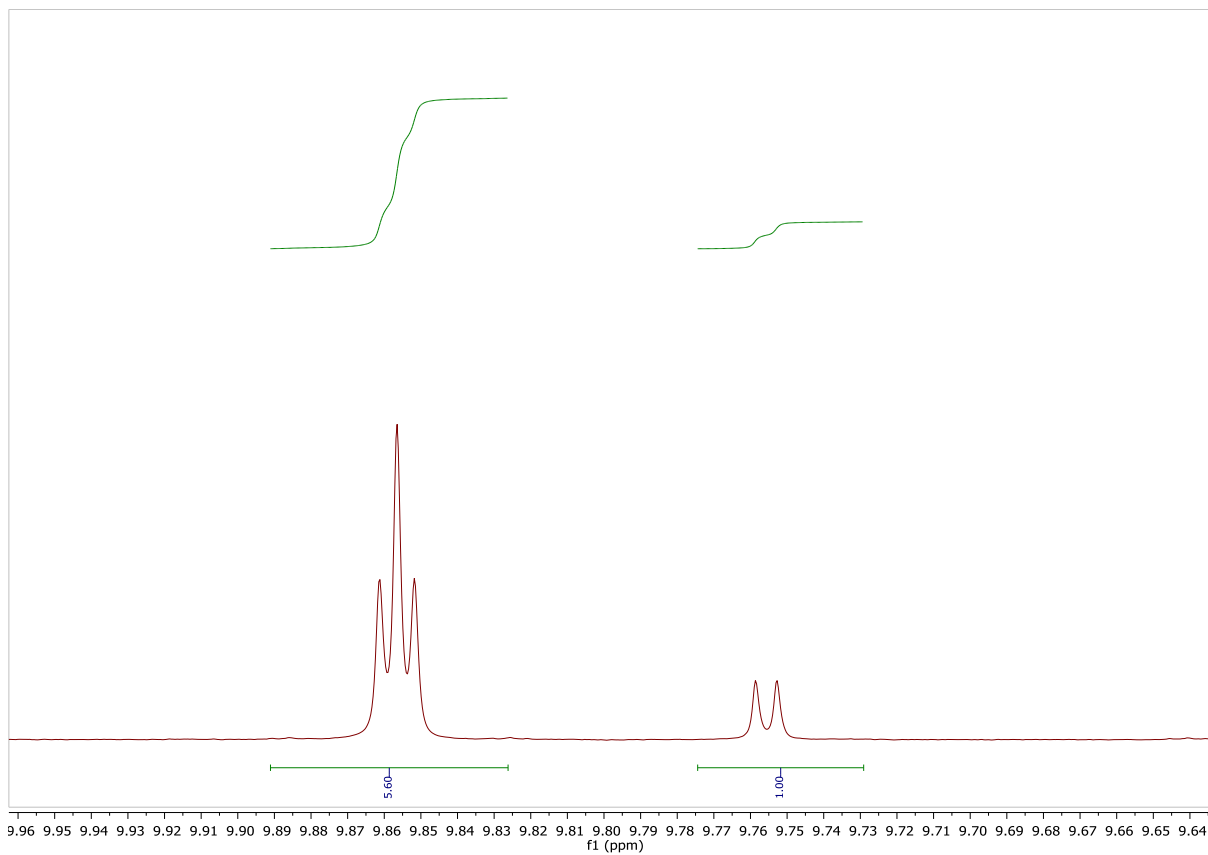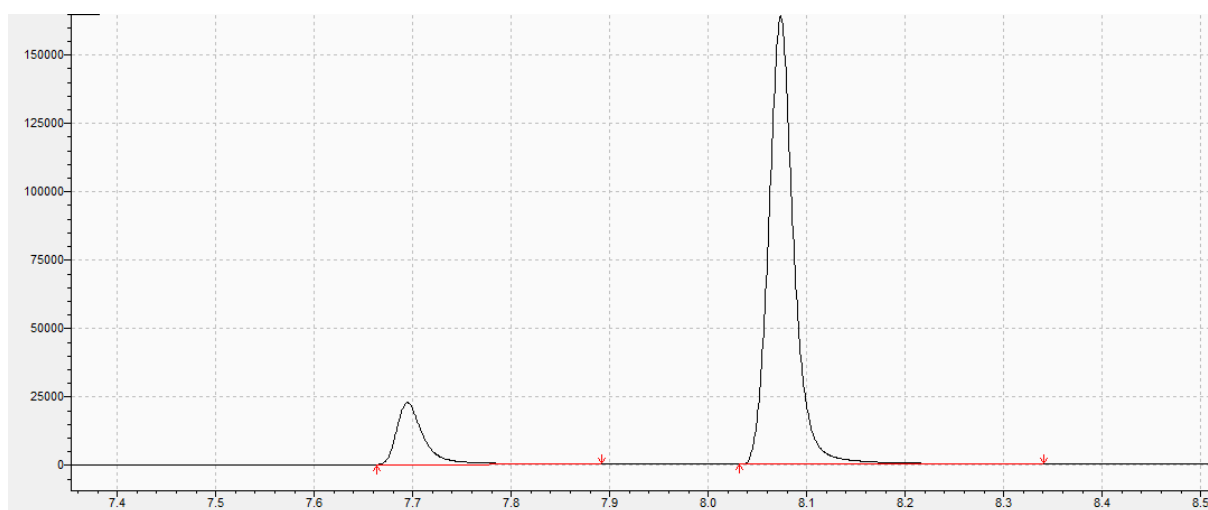

| Retention time | Area   |          | l/b ratio |
|----------------|--------|----------|-----------|
| 7.695          | 43449  | branched | 6.7       |
| 8.073          | 292083 | Linear   |           |

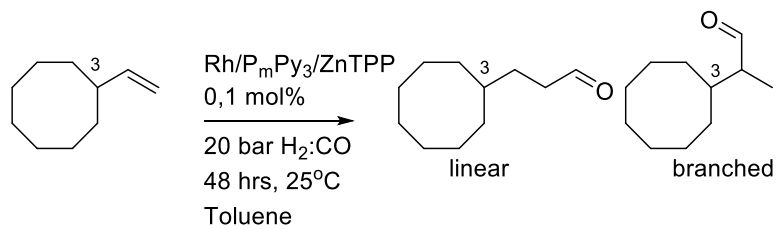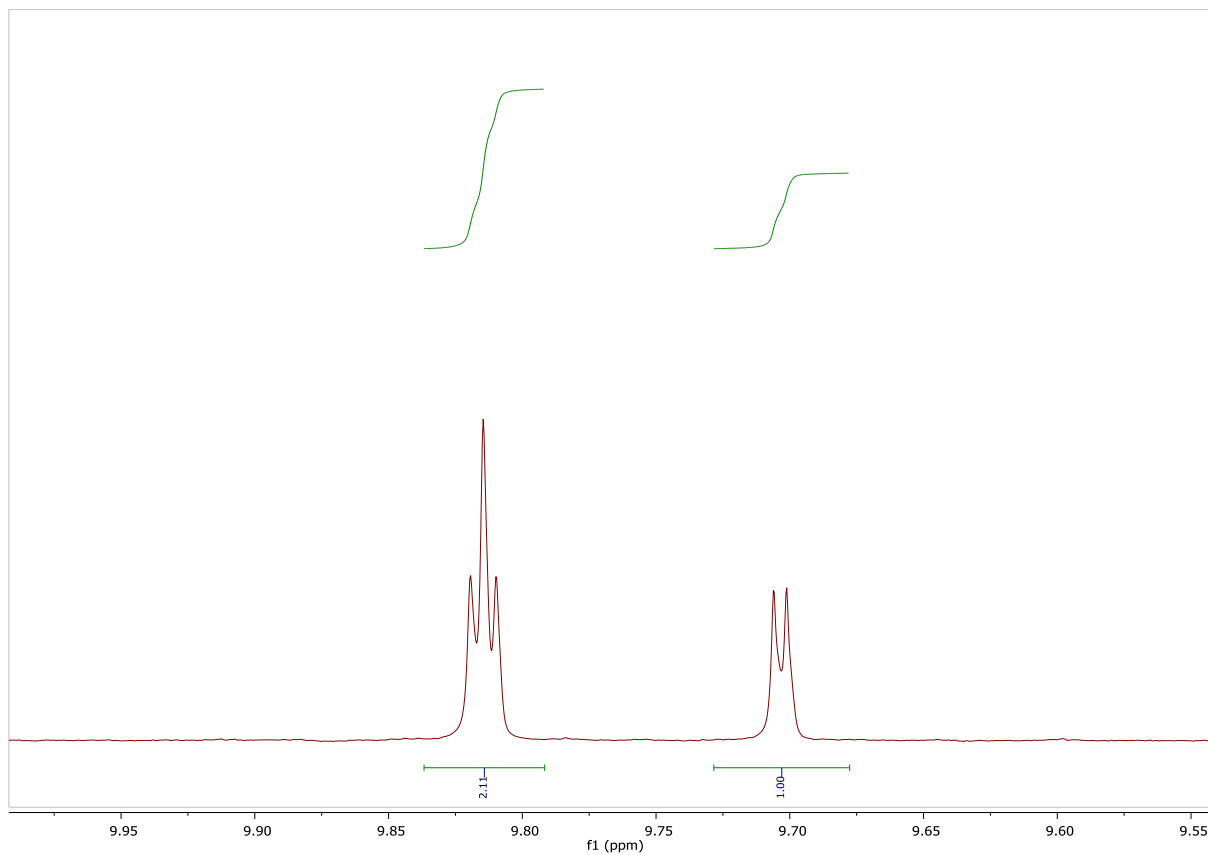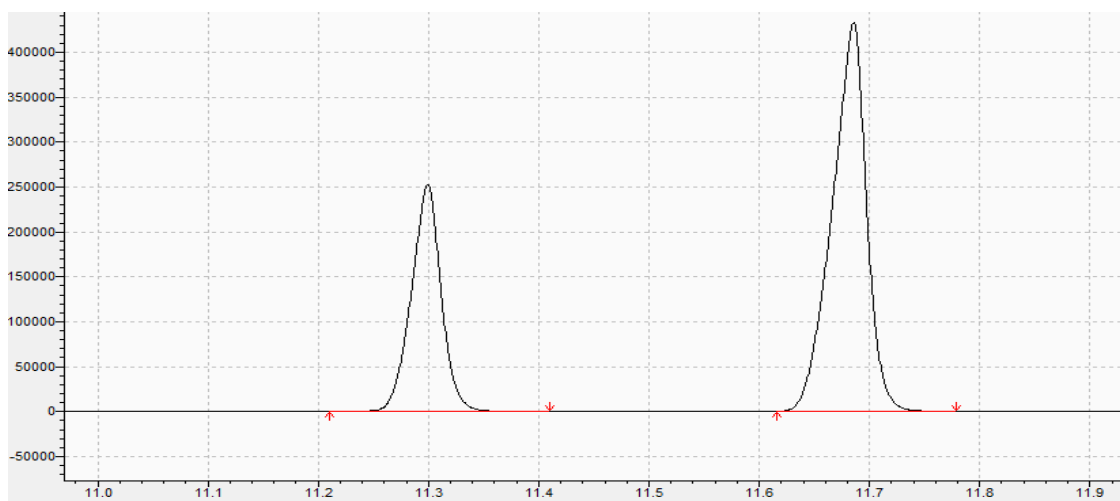

| Retention time | Area   |          | l/b ratio |
|----------------|--------|----------|-----------|
| 11,299         | 473573 | Branched |           |
| 11,685         | 939316 | Linear   | 1.98      |

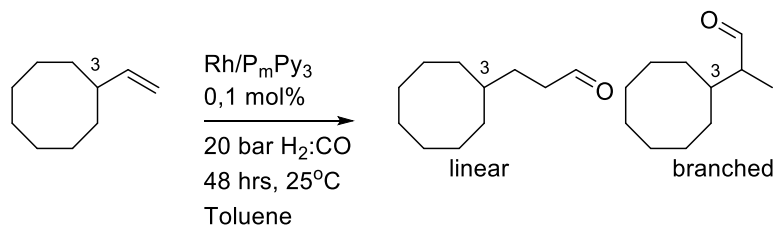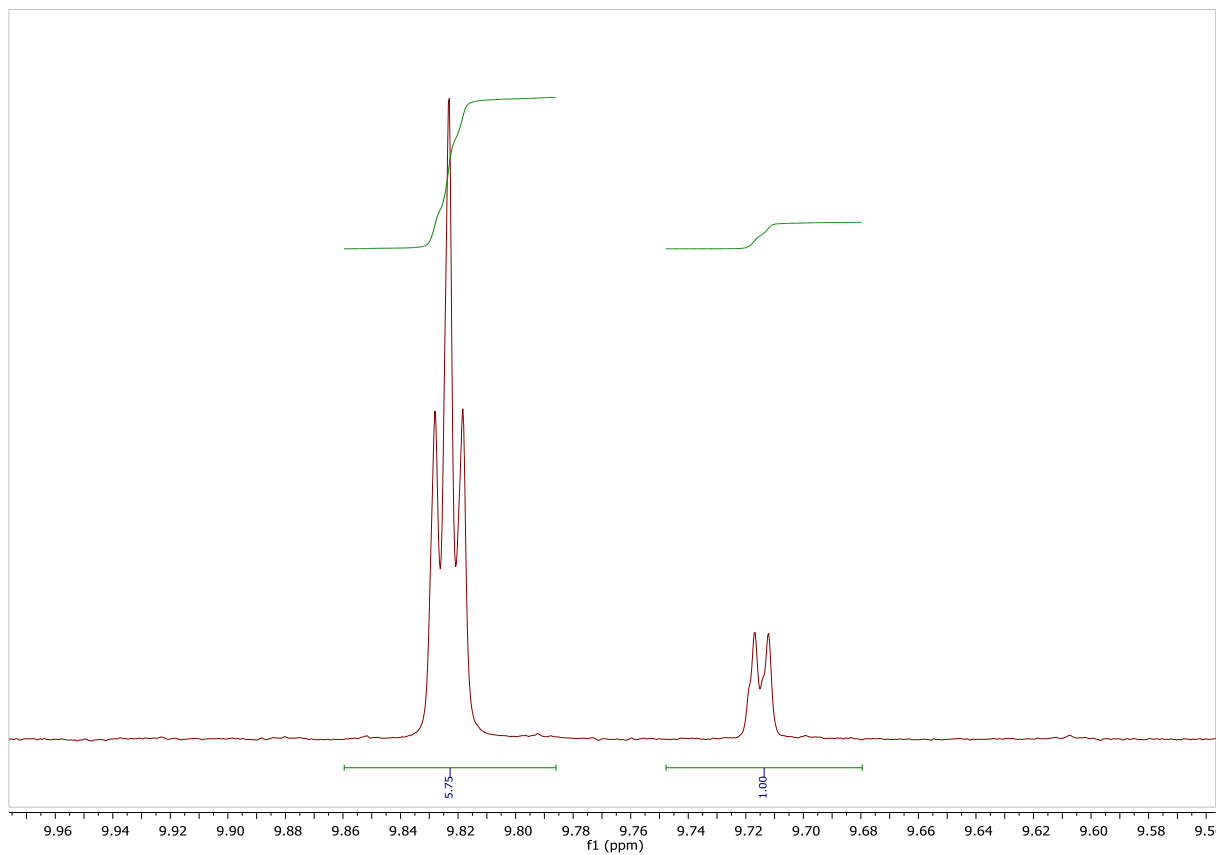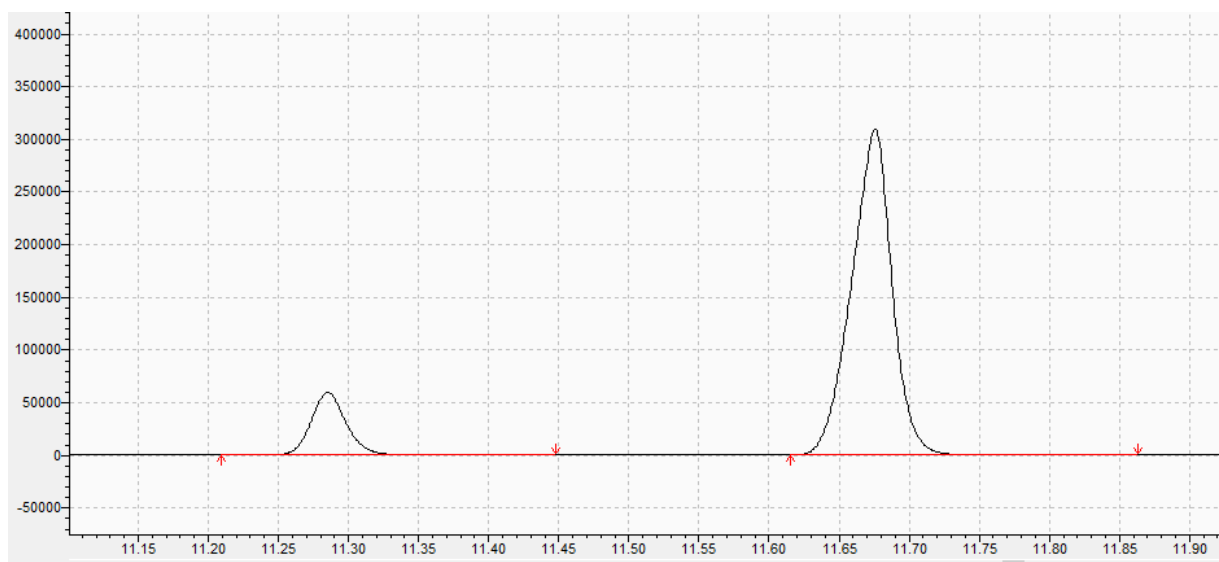

| Retention time | Area   |          | I/b ratio |
|----------------|--------|----------|-----------|
| 11,378         | 103245 | Branched |           |
| 11,675         | 621022 | Linear   | 6,015032  |

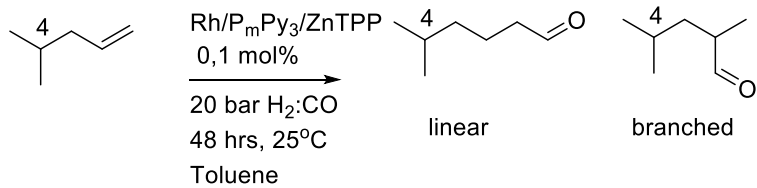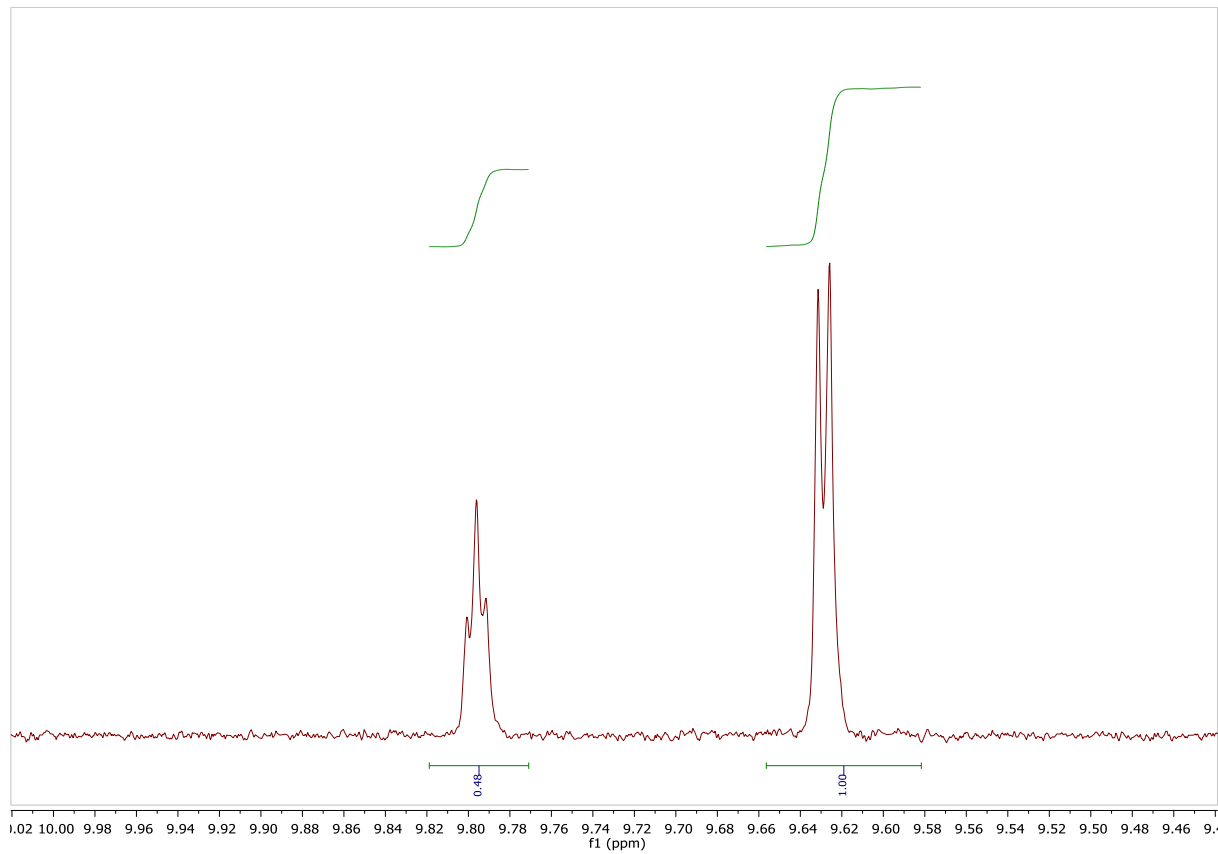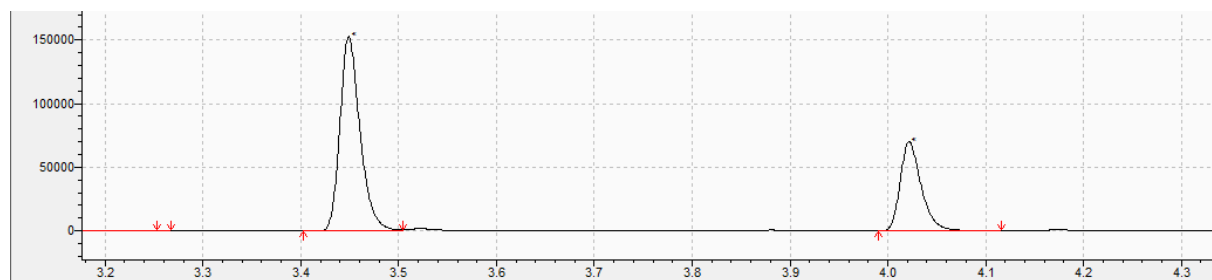

| Retention time | Area   |          | l/b ratio |
|----------------|--------|----------|-----------|
| 3,449          | 217641 | Branched | 0,47      |
| 4,022          | 102969 | Linear   |           |

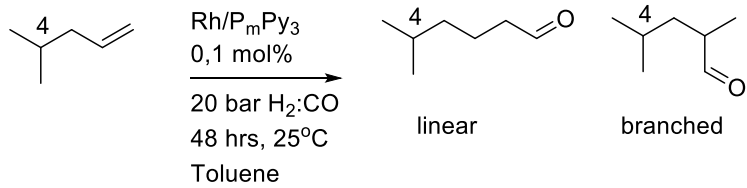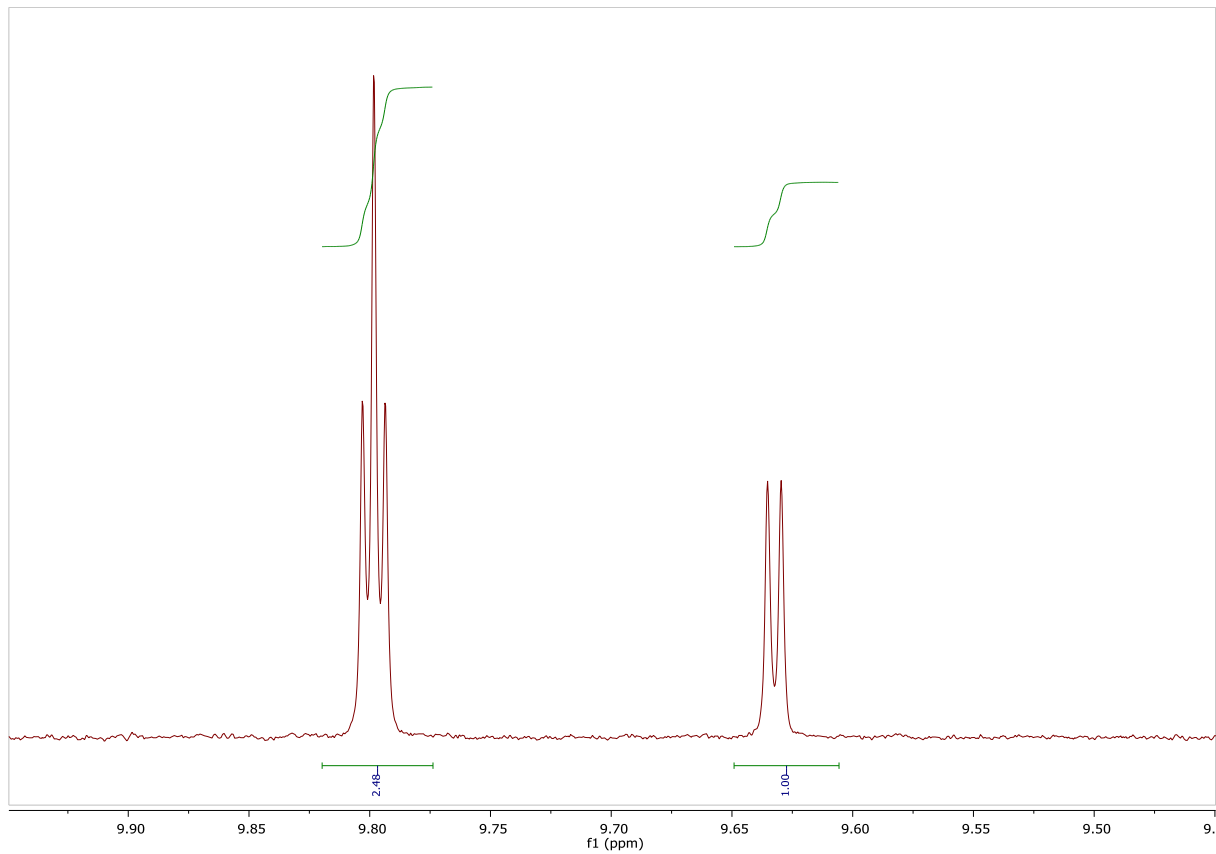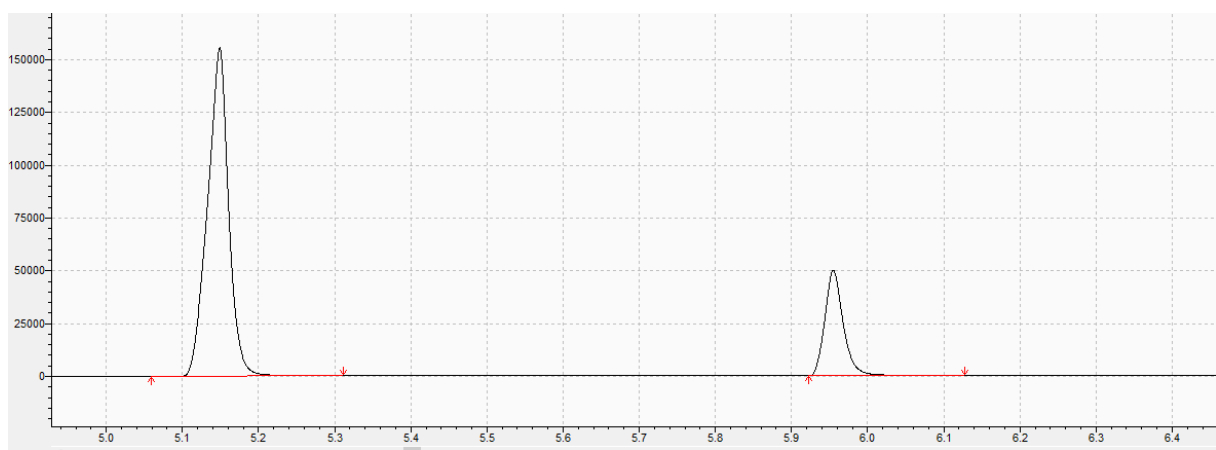

| Retention time | area   |          | l/b ratio |
|----------------|--------|----------|-----------|
| 3,44           | 59918  | Branched | 2.72      |
| 4,013          | 163327 | Linear   |           |

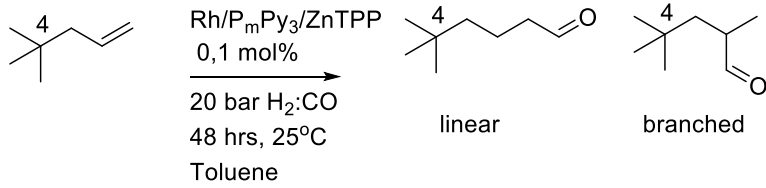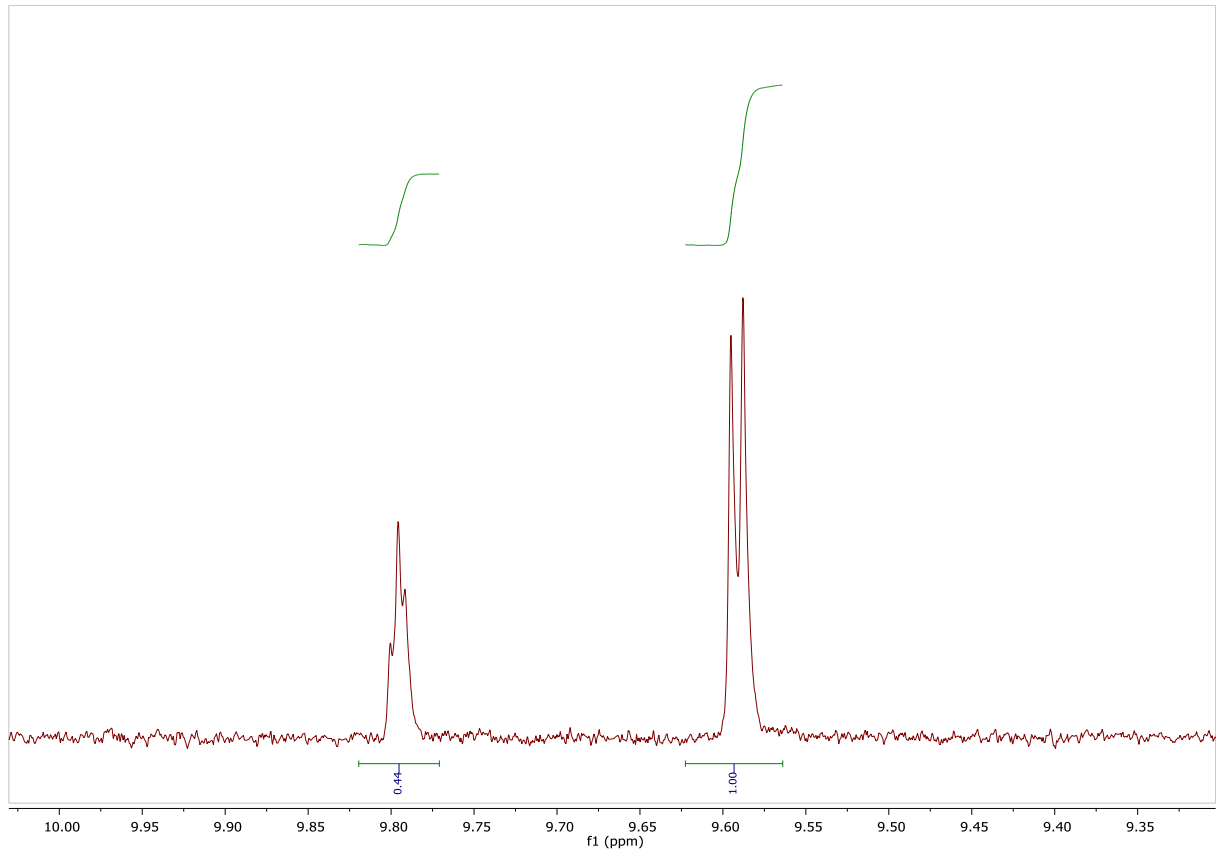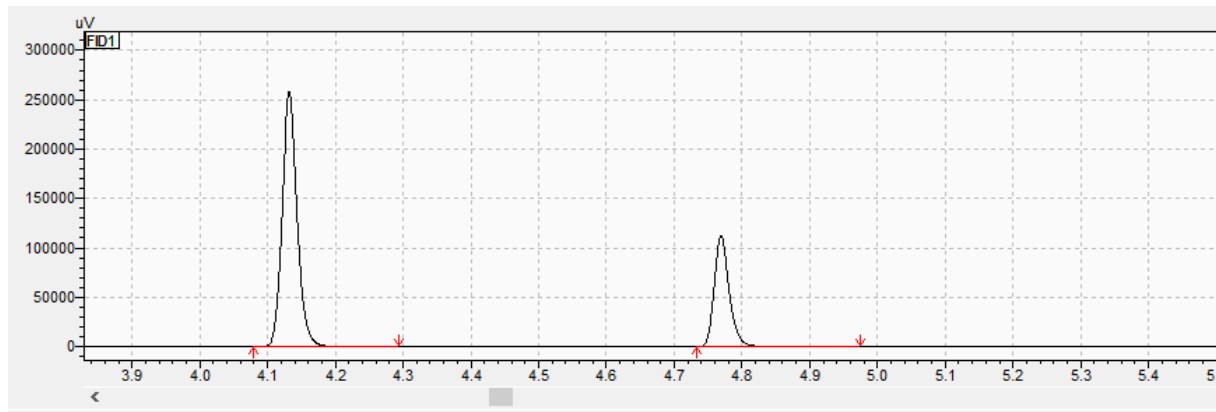

| Retention time | Area   |          | l/b ratio |
|----------------|--------|----------|-----------|
| 4,132          | 391595 | Branched | 0,44      |
| 4,769          | 171142 | Linear   |           |



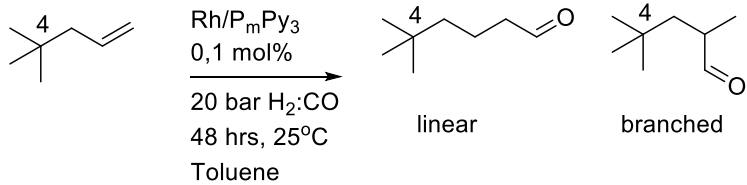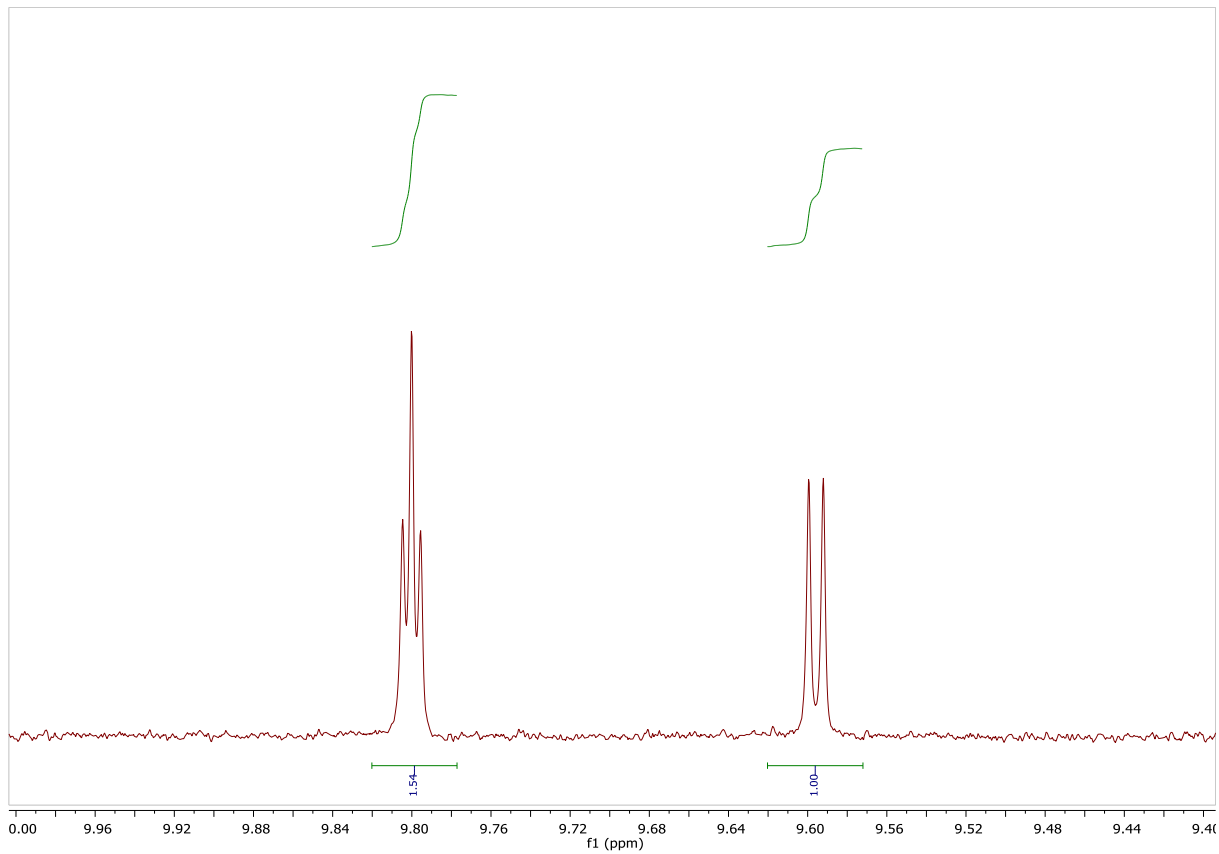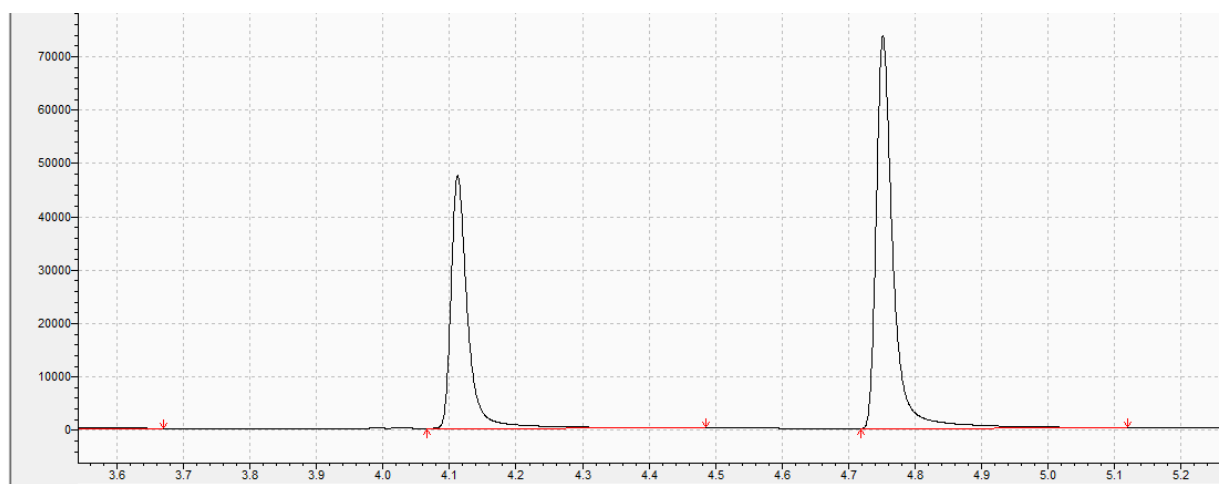

| Retention time | area   |          | l/b ratio |
|----------------|--------|----------|-----------|
| 4,112          | 83980  | branched | 1.56      |
| 4,752          | 131076 | Linear   |           |

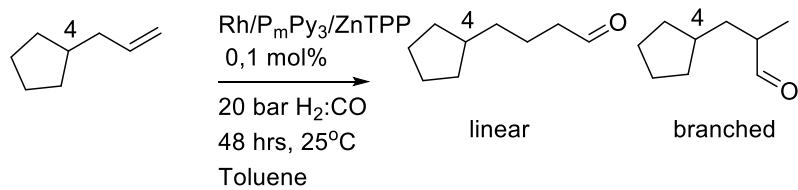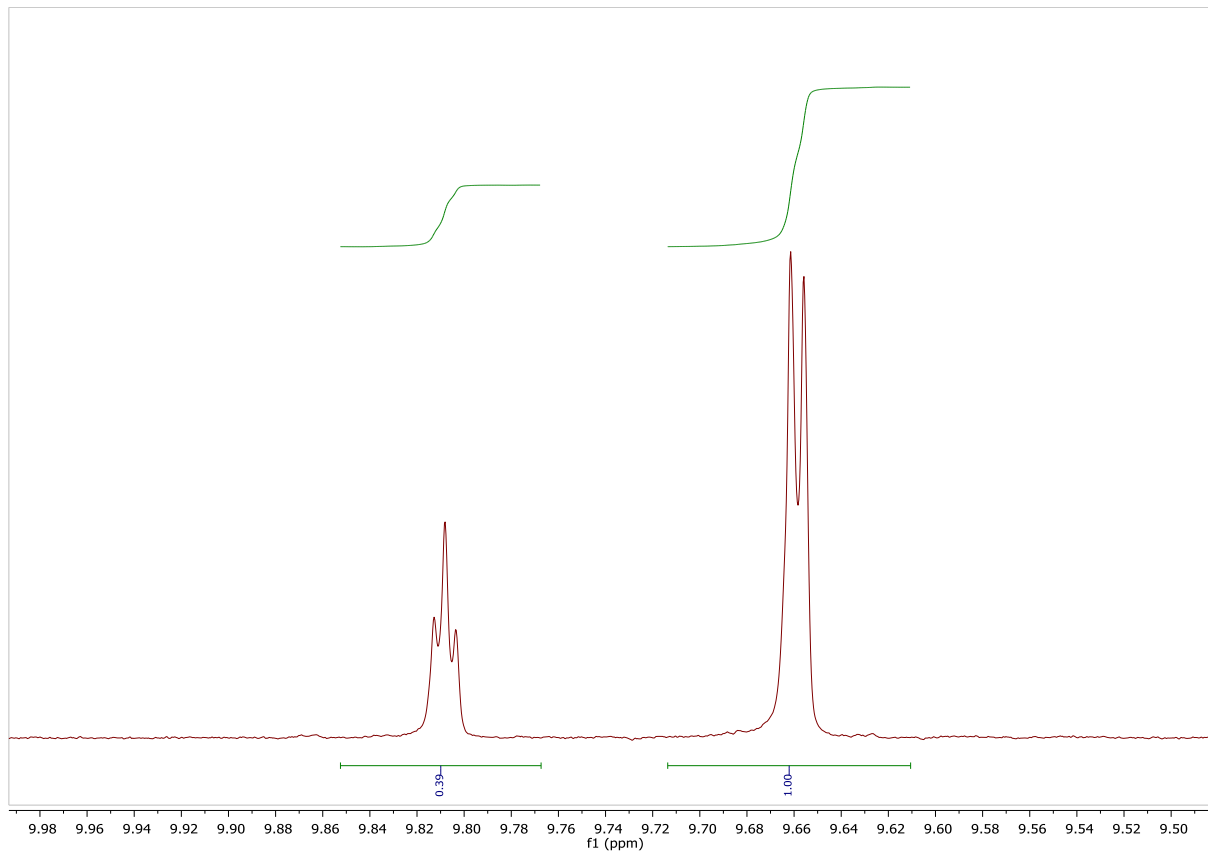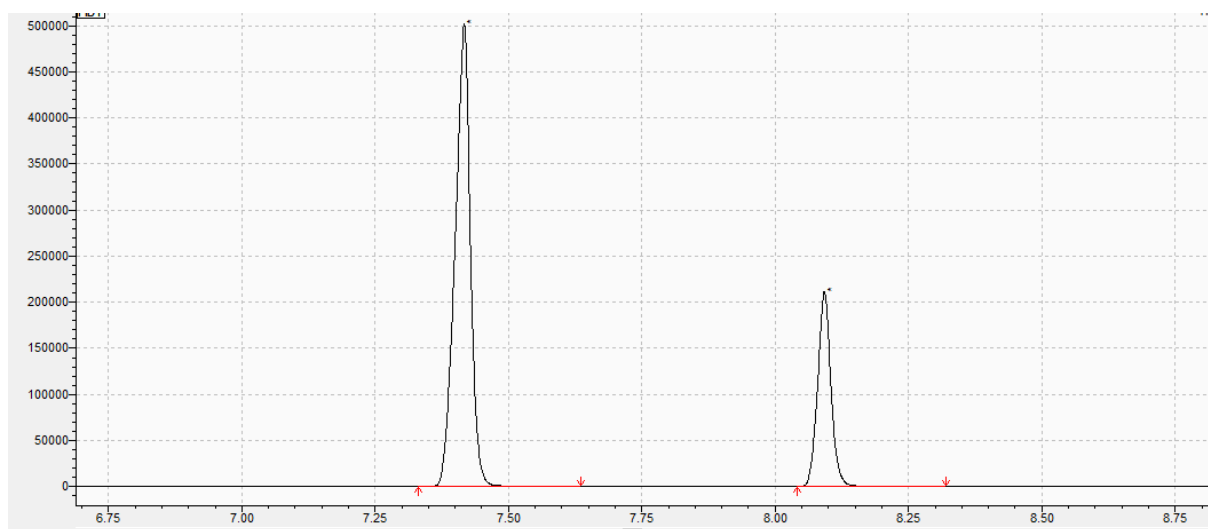

| Retention time | Area    |          | l/b ratio |
|----------------|---------|----------|-----------|
| 7,417          | 1001993 | Branched | 0.36      |
| 8,092          | 366610  | Linear   |           |

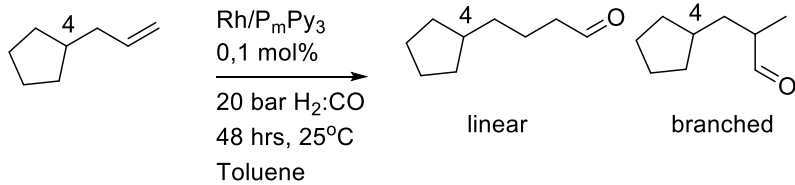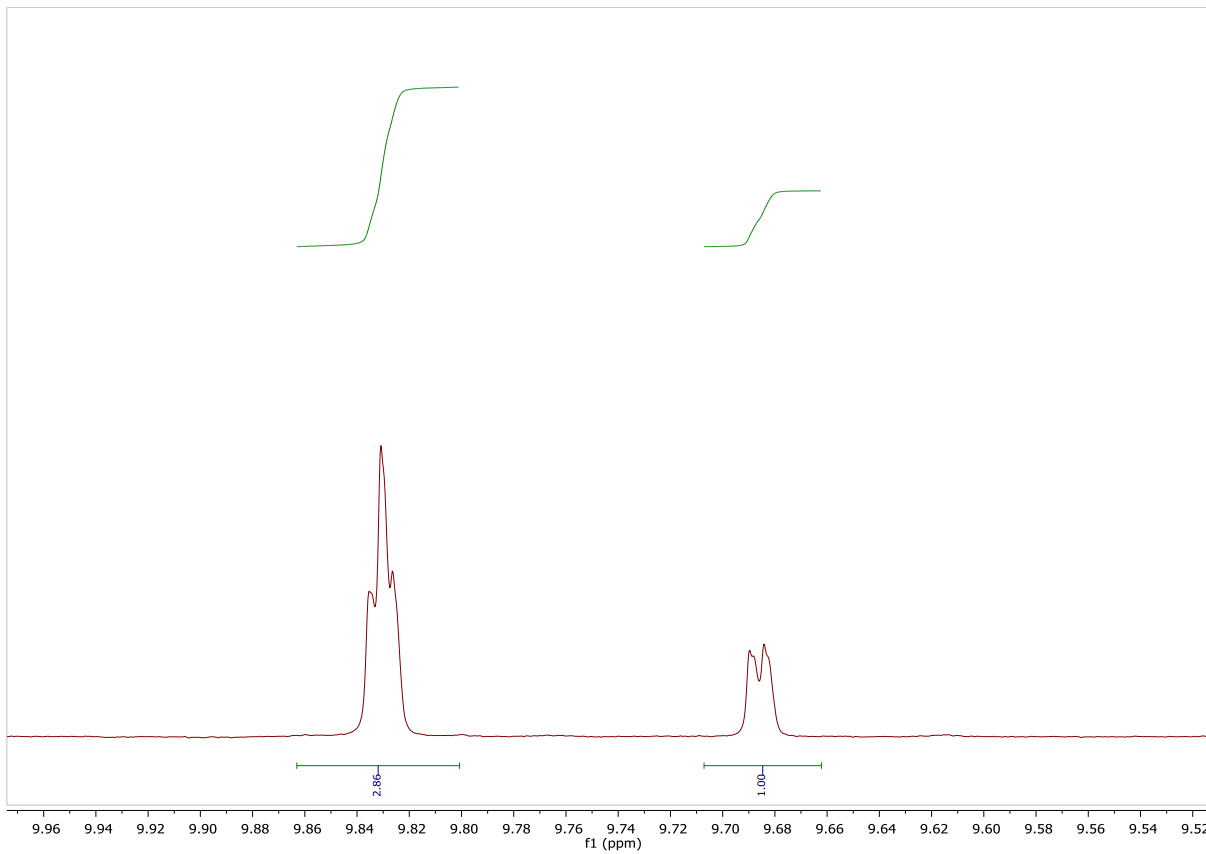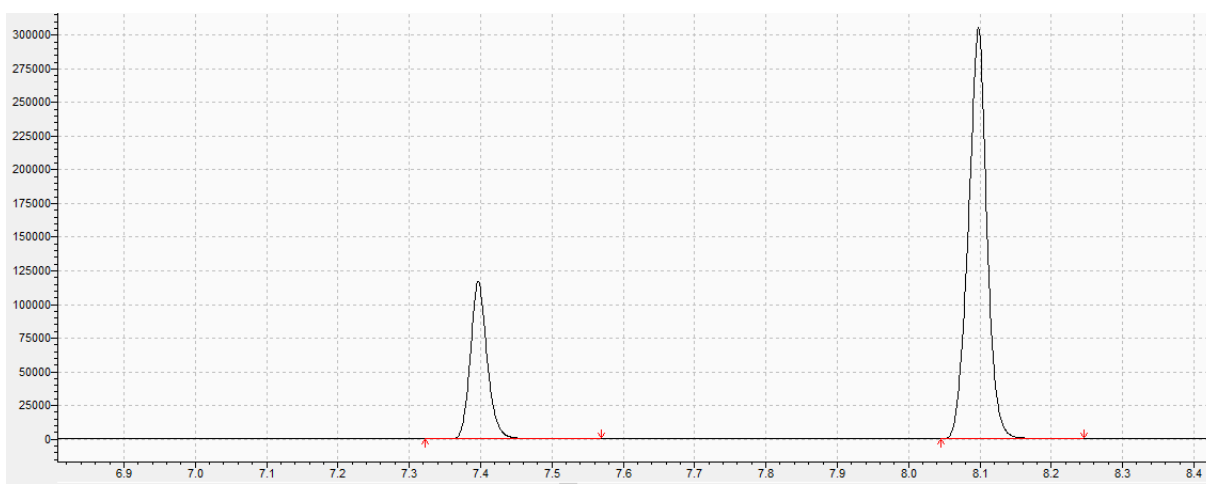

| Retention time | Area   |          | I/b ratio |
|----------------|--------|----------|-----------|
| 7,397          | 189808 | Branched | 2.91      |
| 8,098          | 551937 | Linear   |           |

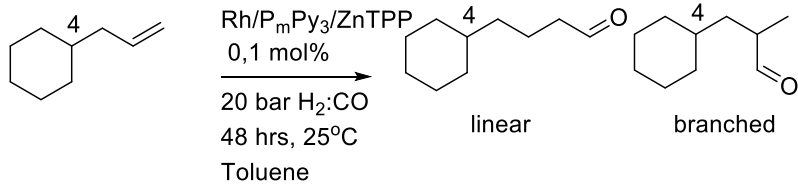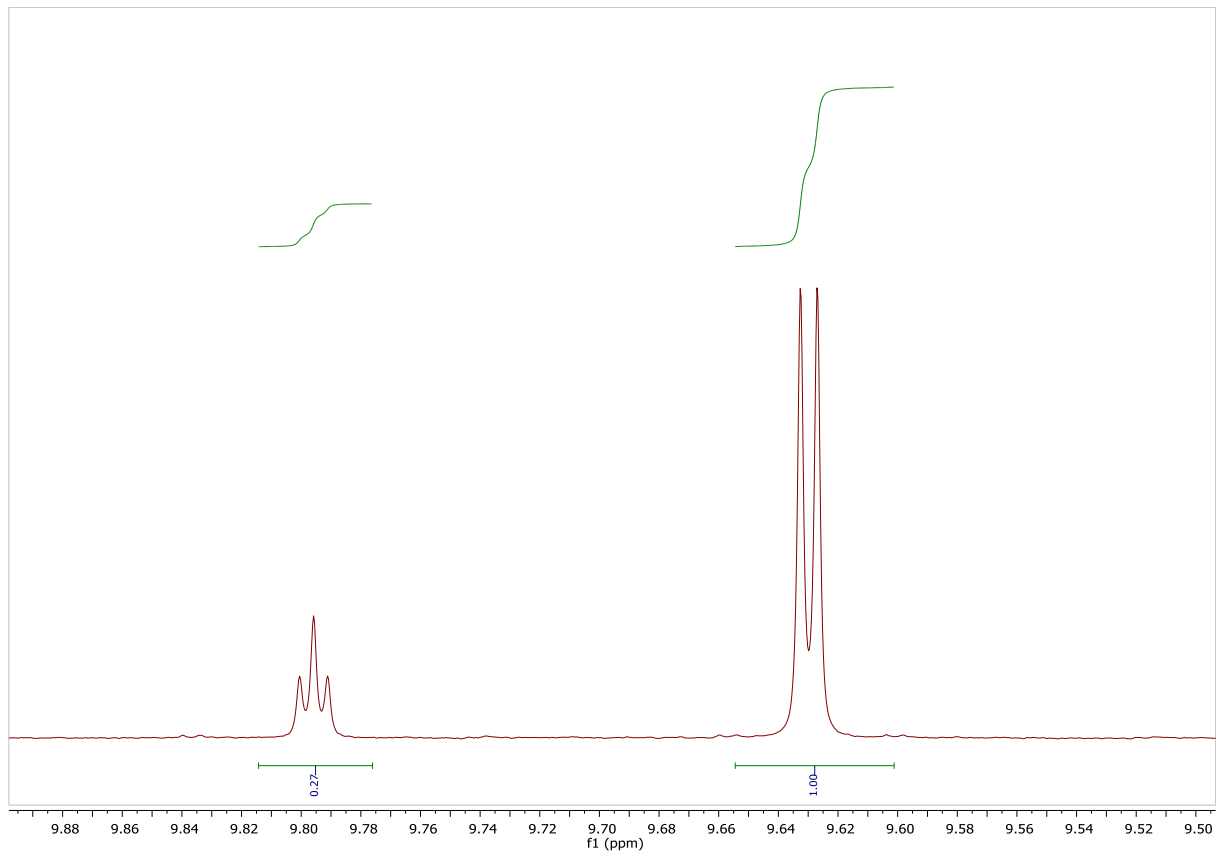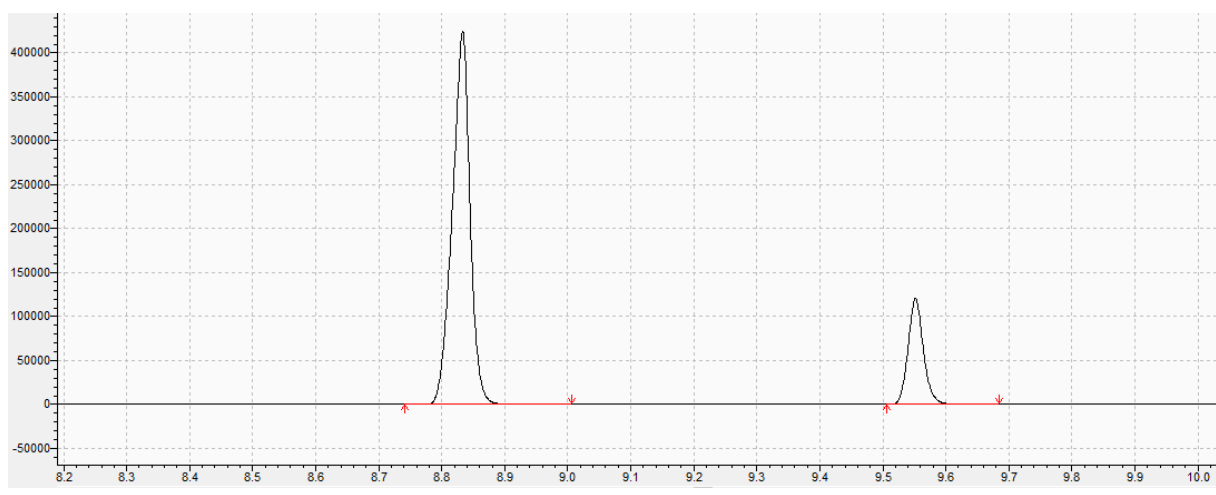

| Retention time | area   |          | l/b ratio |
|----------------|--------|----------|-----------|
| 8,833          | 831630 | Branched | 0.244     |
| 9,552          | 202663 | Linear   |           |

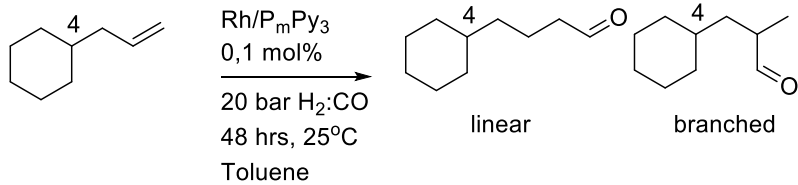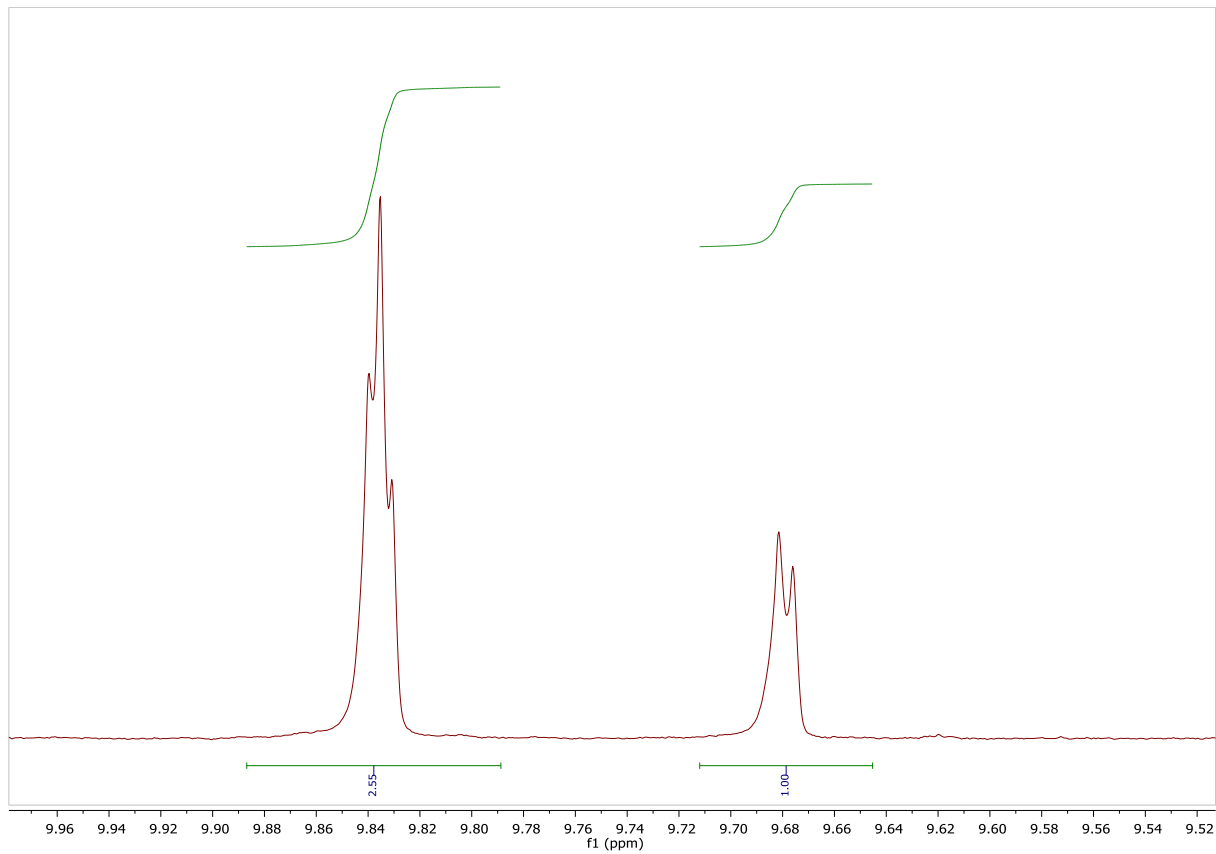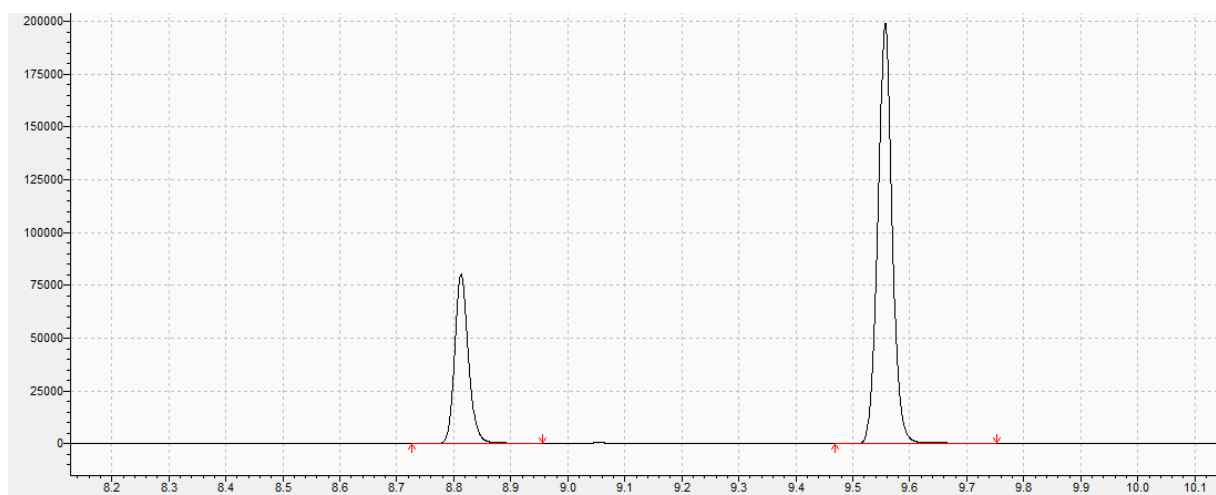

| Retention time | area   |          | l/b ratio |
|----------------|--------|----------|-----------|
| 8,813          | 133295 | Branched | 2.62      |
| 9,557          | 348725 | Linear   |           |

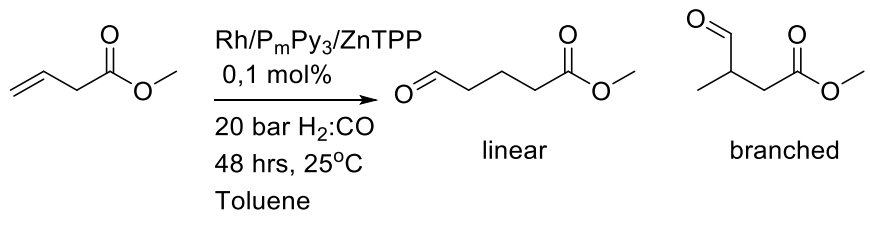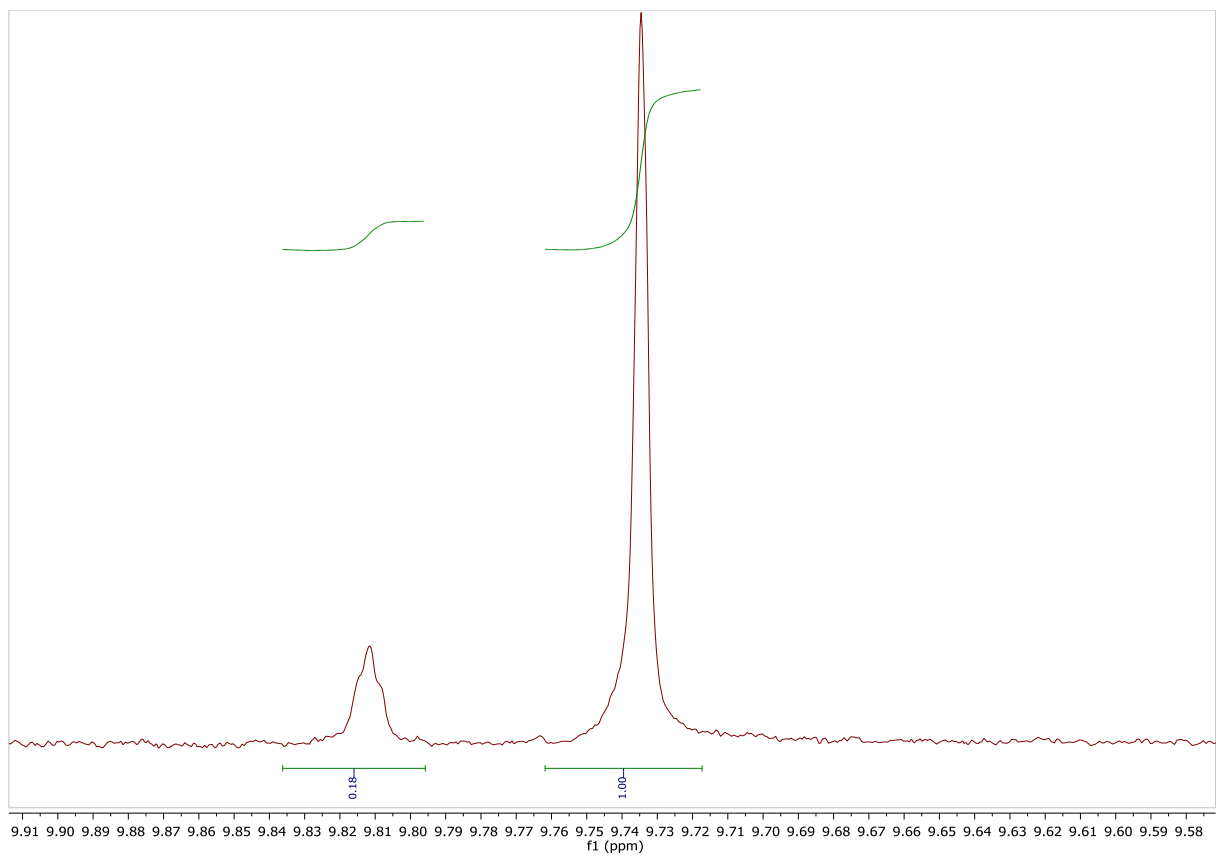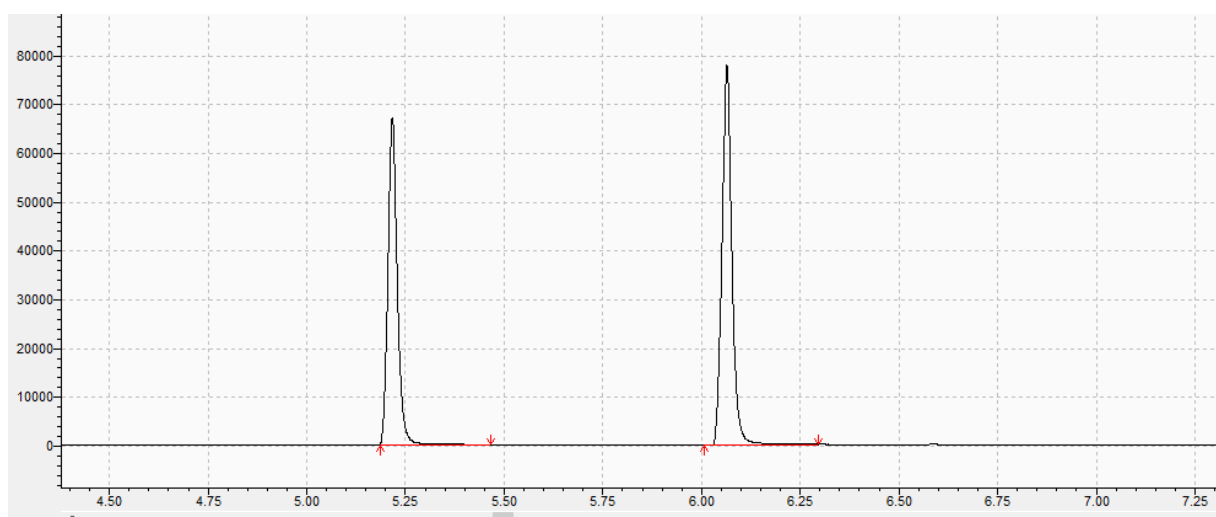

| Retention time | Area   |          | l/b ratio |
|----------------|--------|----------|-----------|
| 5,271          | 456918 | branched | 0.18      |
| 6,093          | 83979  | Linear   |           |

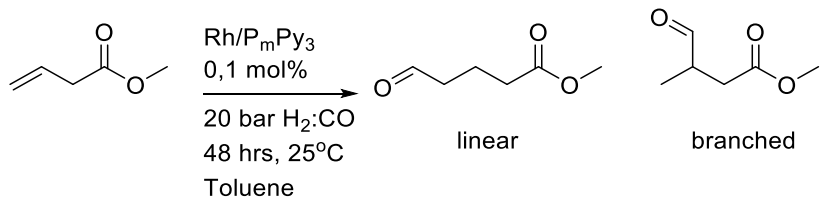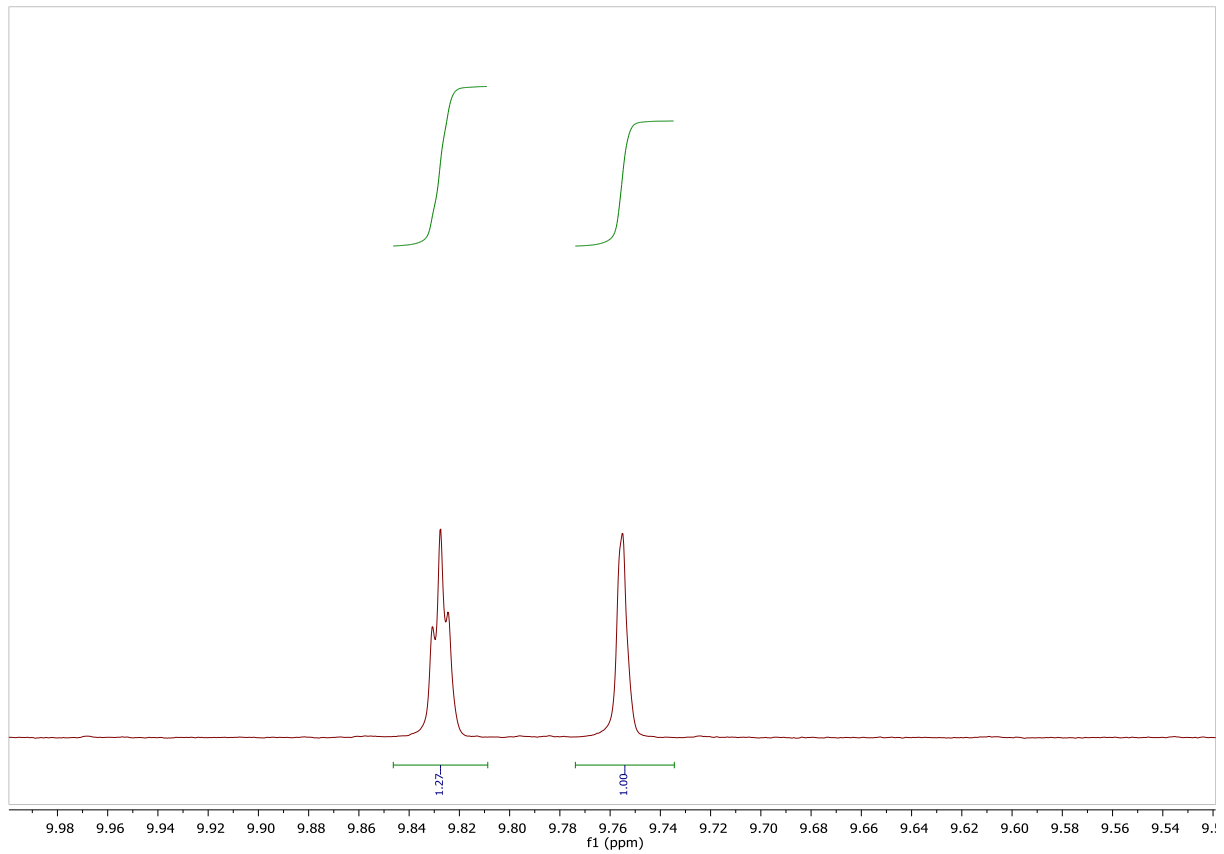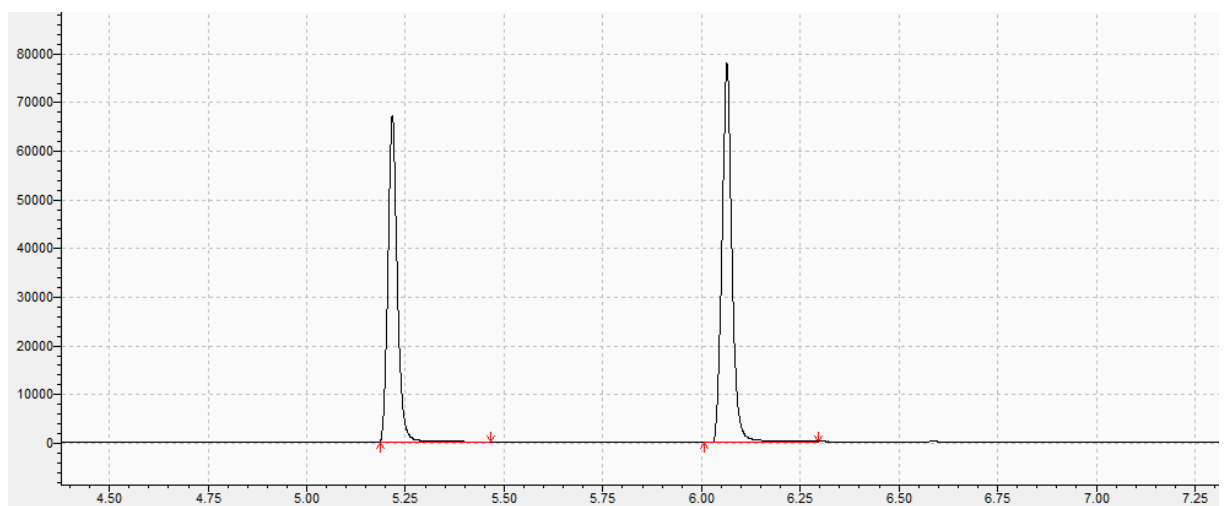

| Retention time | Area   |          | I/b ratio |
|----------------|--------|----------|-----------|
| 5,217          | 109812 | Branched | 1.23      |
| 6,064          | 135468 | Linear   |           |

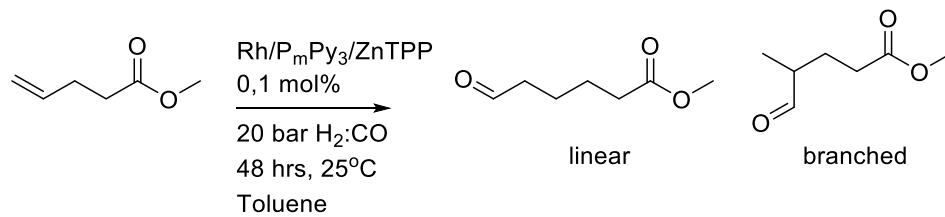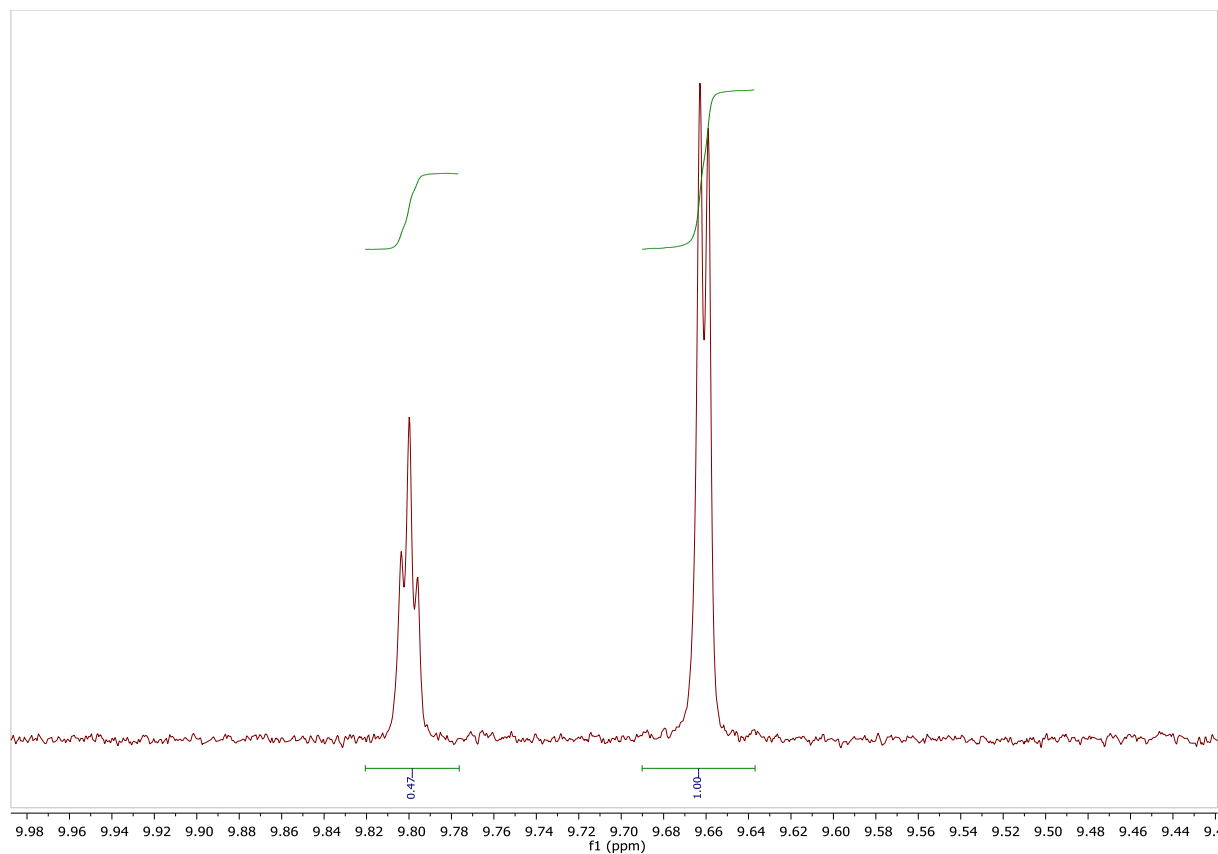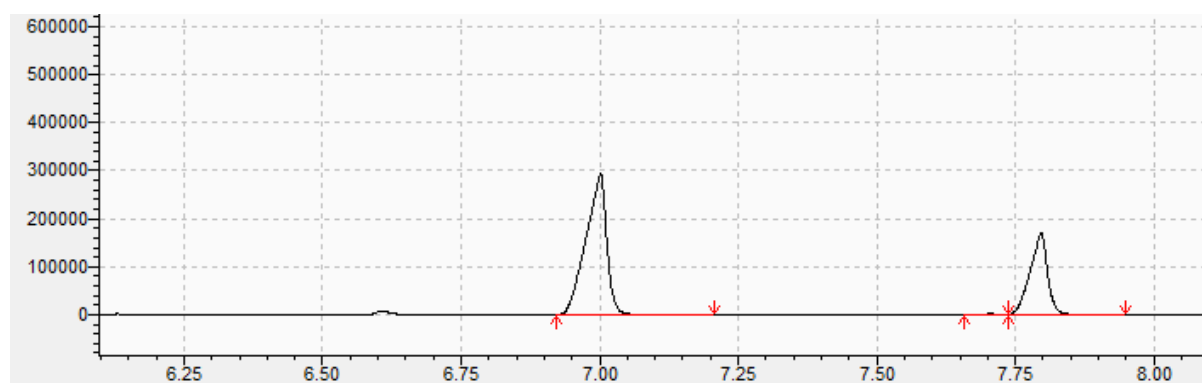

| Retention time | Area   |          | l/b ratio |
|----------------|--------|----------|-----------|
| 7,001          | 764538 | Branched | 0.48      |
| 7,796          | 370191 | Linear   |           |



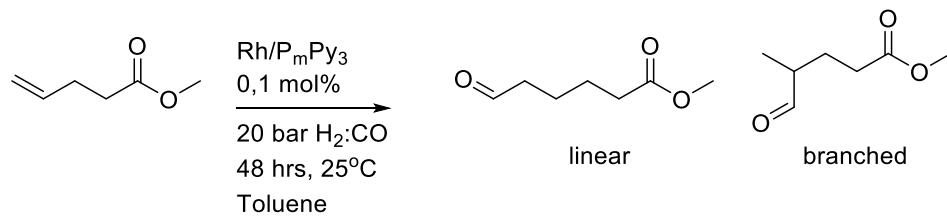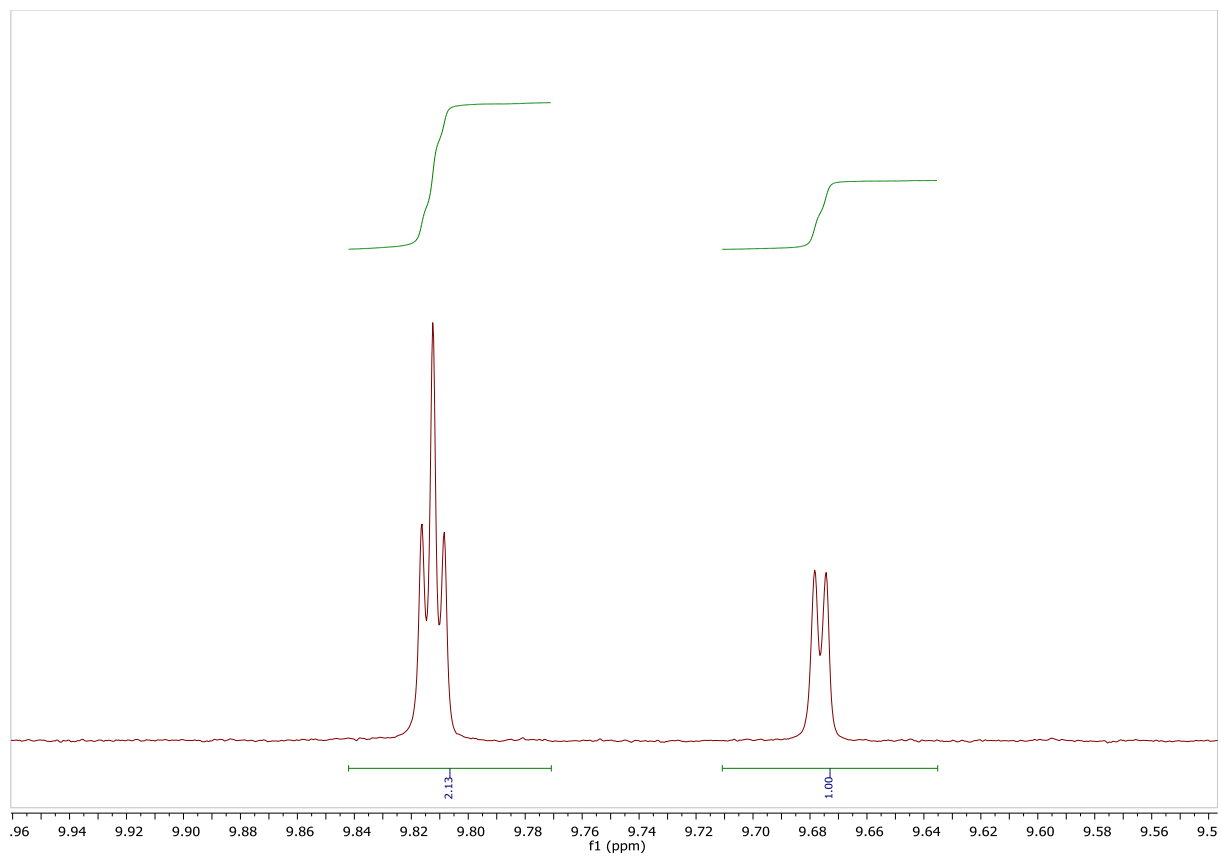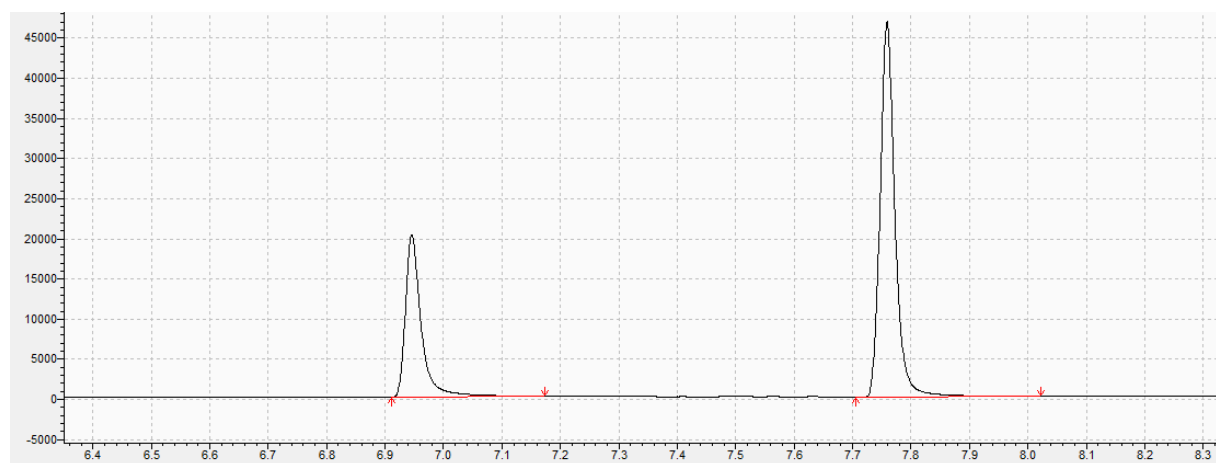

| Retention time | Area  |          | I/b ratio |
|----------------|-------|----------|-----------|
| 6,946          | 37795 | Branched | 2,18      |
| 7,759          | 82380 | Linear   |           |

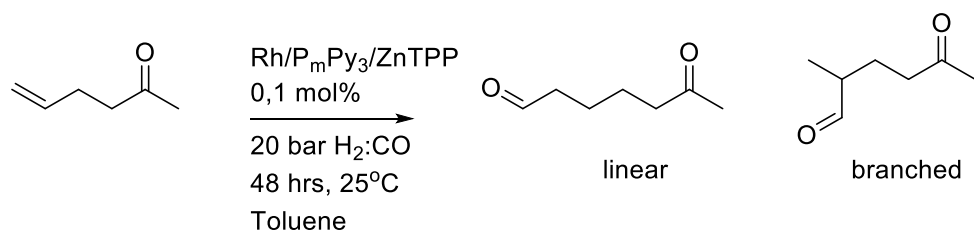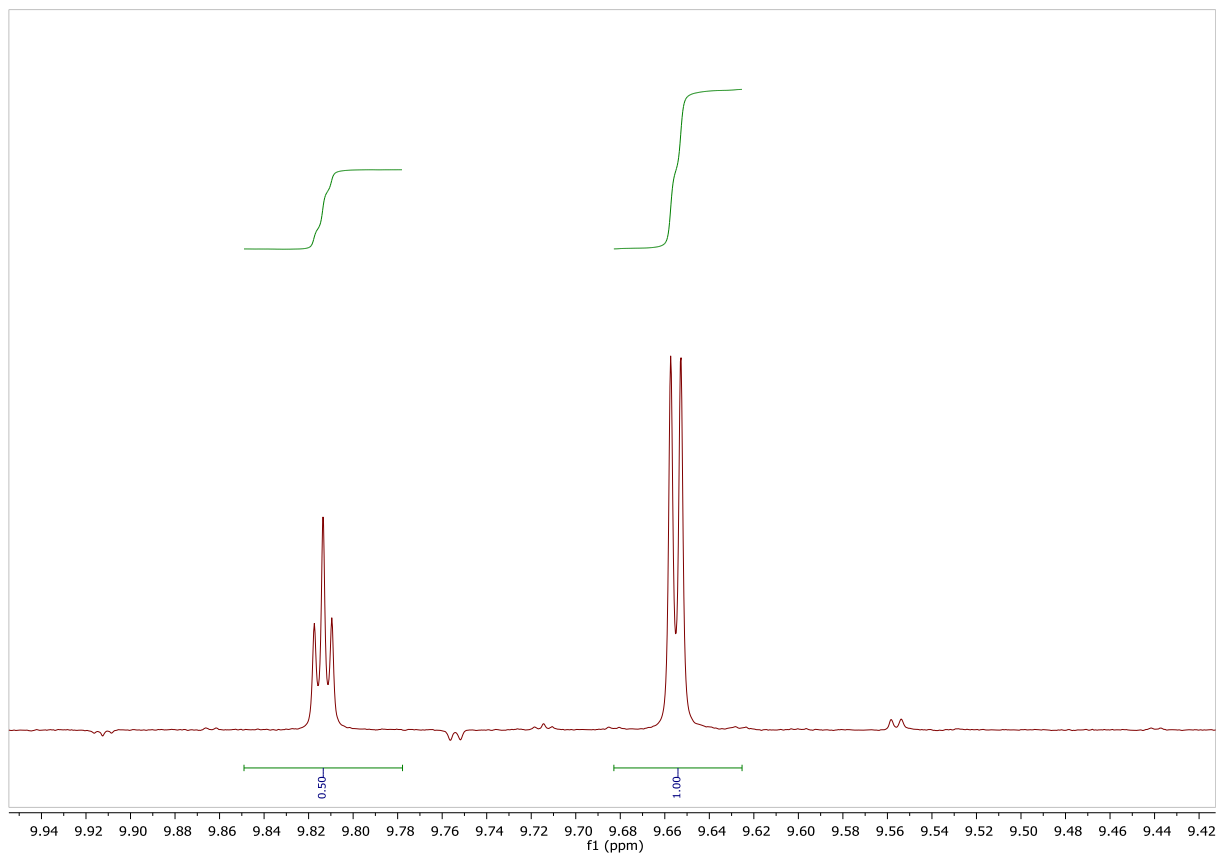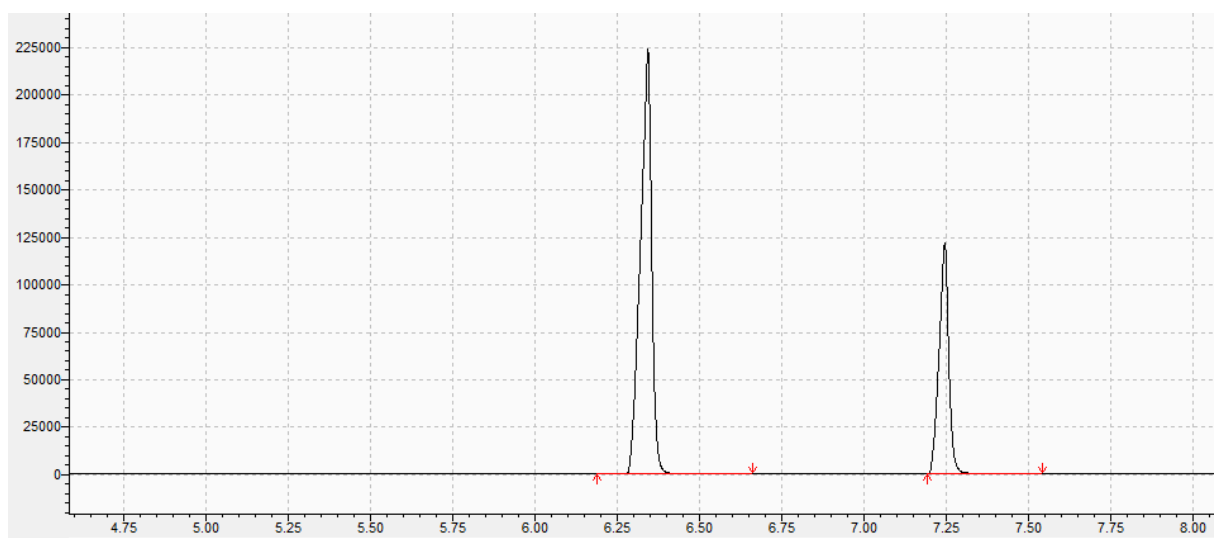

| Retention time | Area   |          |      |
|----------------|--------|----------|------|
| 6,341          | 534134 | Branched | 0.47 |
| 7,244          | 250453 | Linear   |      |

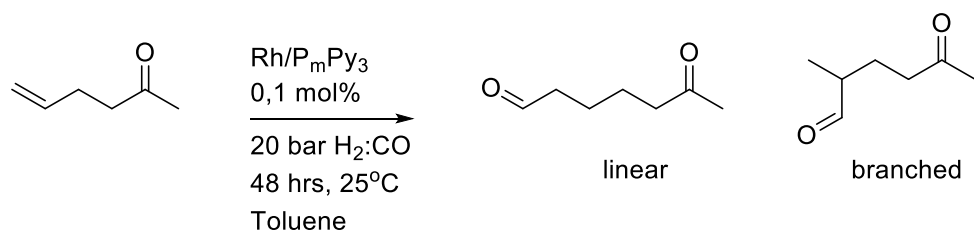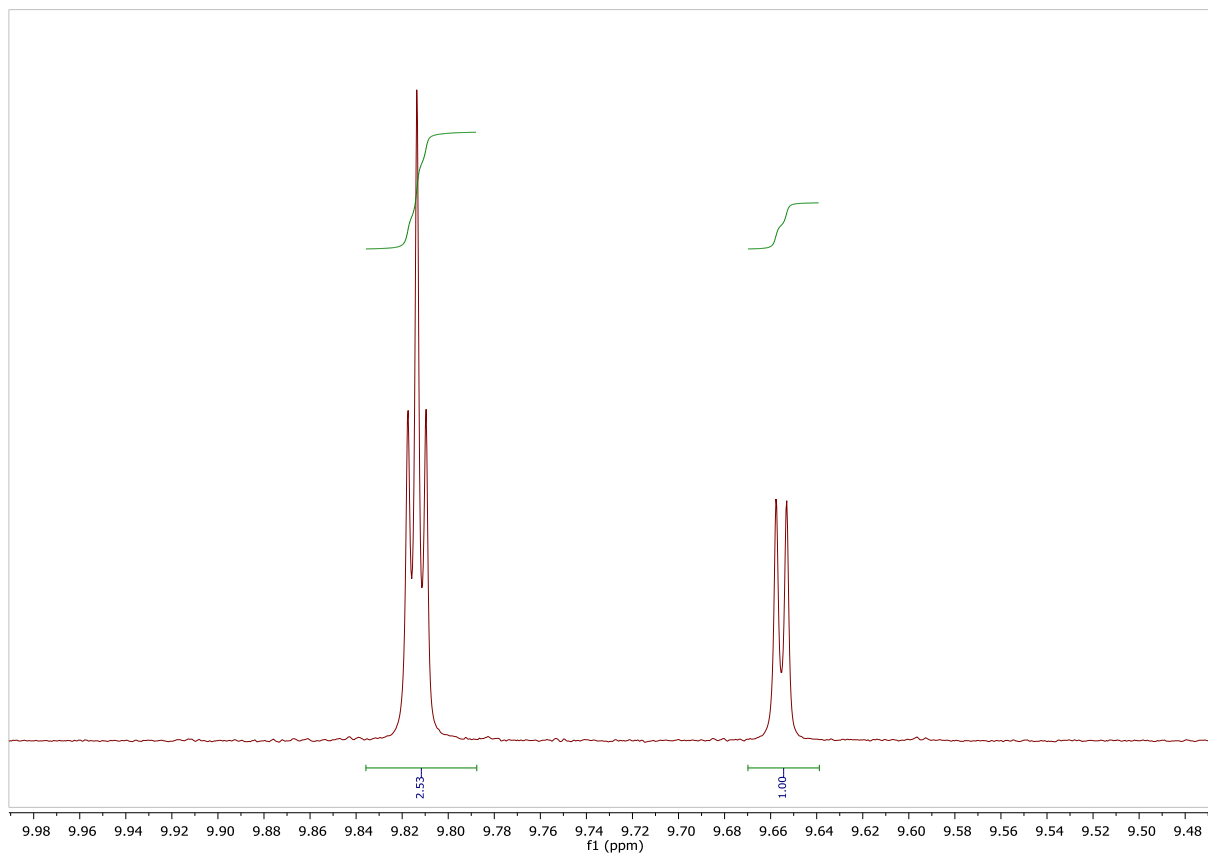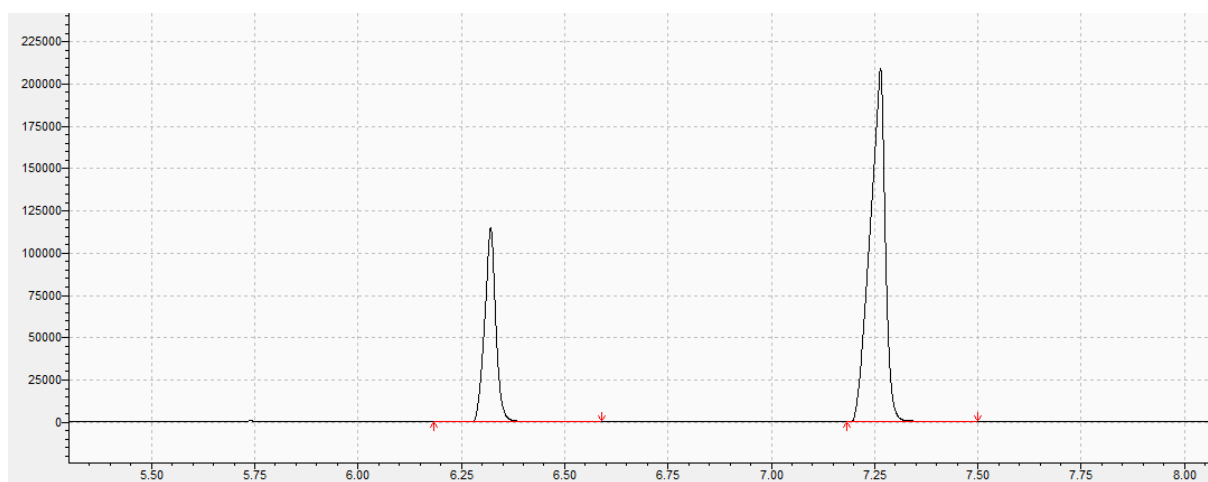

| Retention time | Area   |          | l/b ratio |
|----------------|--------|----------|-----------|
| 6,321          | 214852 | Branched | 2.50      |
| 7,264          | 538596 | Linear   |           |

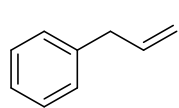

Rh/P<sub>m</sub>Py<sub>3</sub>/ZnTPP  
 0,1 mol%  
 20 bar H<sub>2</sub>:CO  
 48 hrs, 25°C  
 Toluene

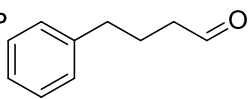

linear

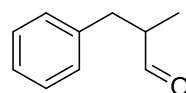

branched

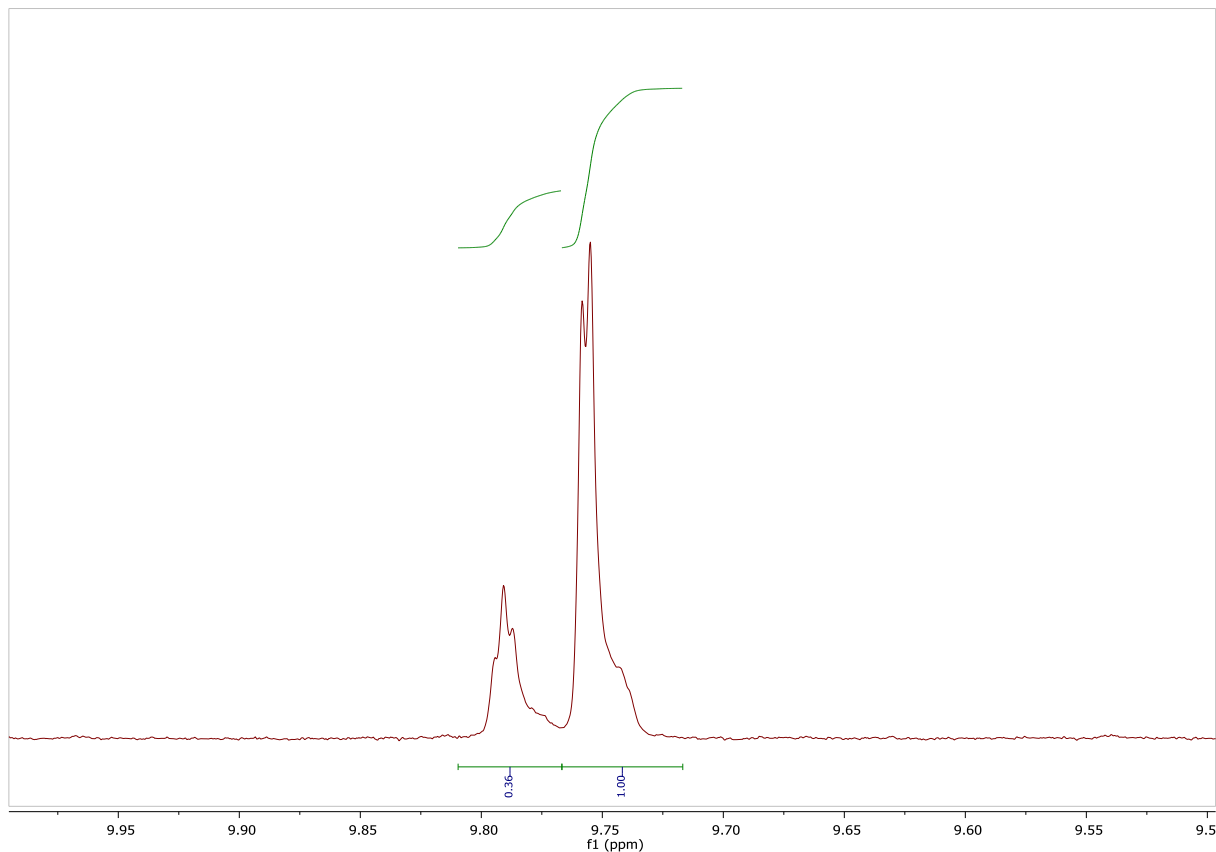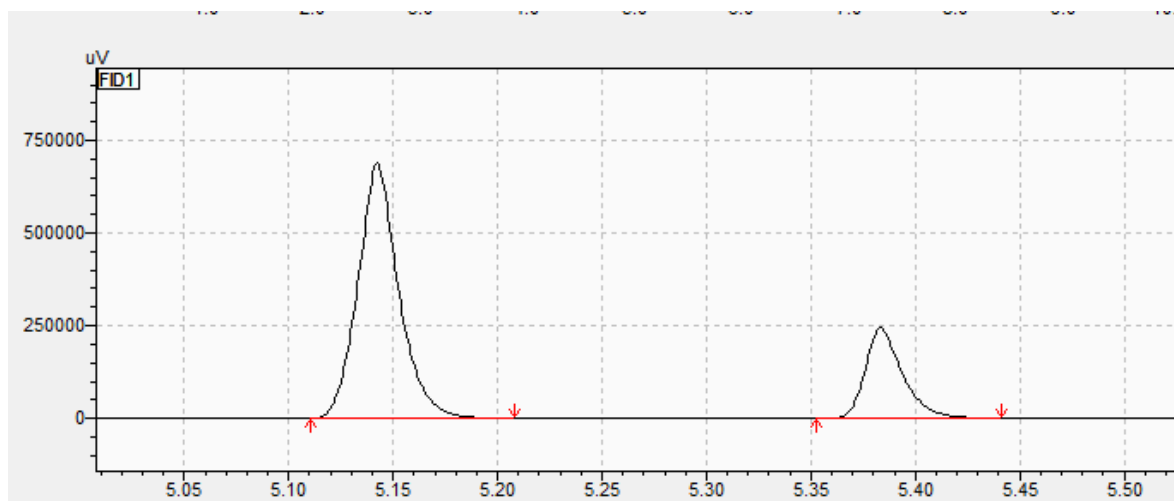

| Retention time | Area   |          | l/b ratio |
|----------------|--------|----------|-----------|
| 5,142          | 933705 | Branched | 0,32      |
| 5,384          | 301168 | Linear   |           |

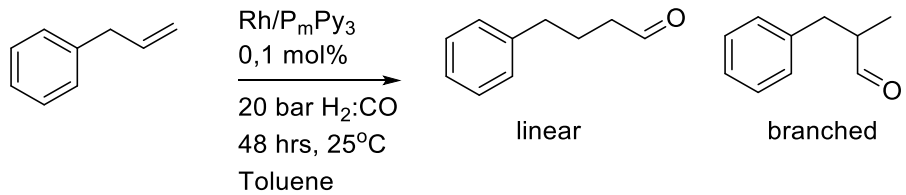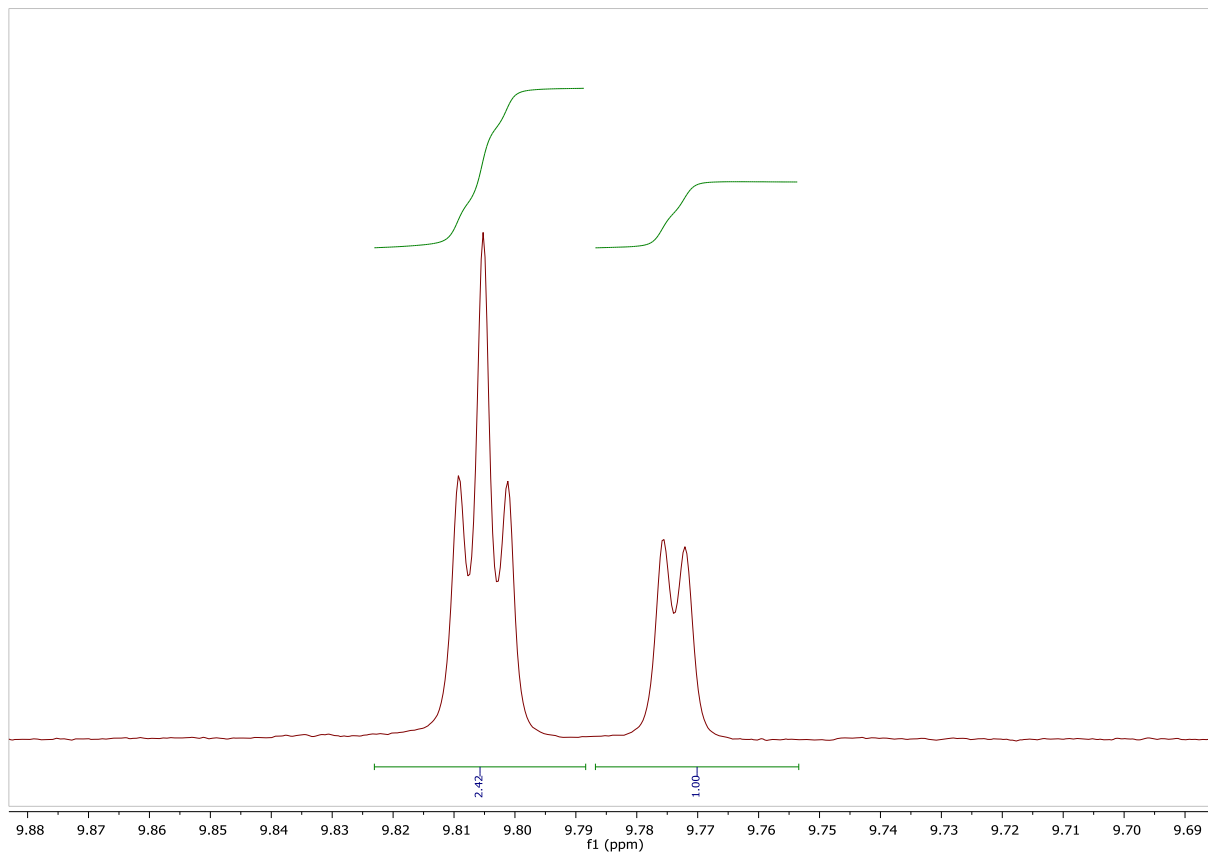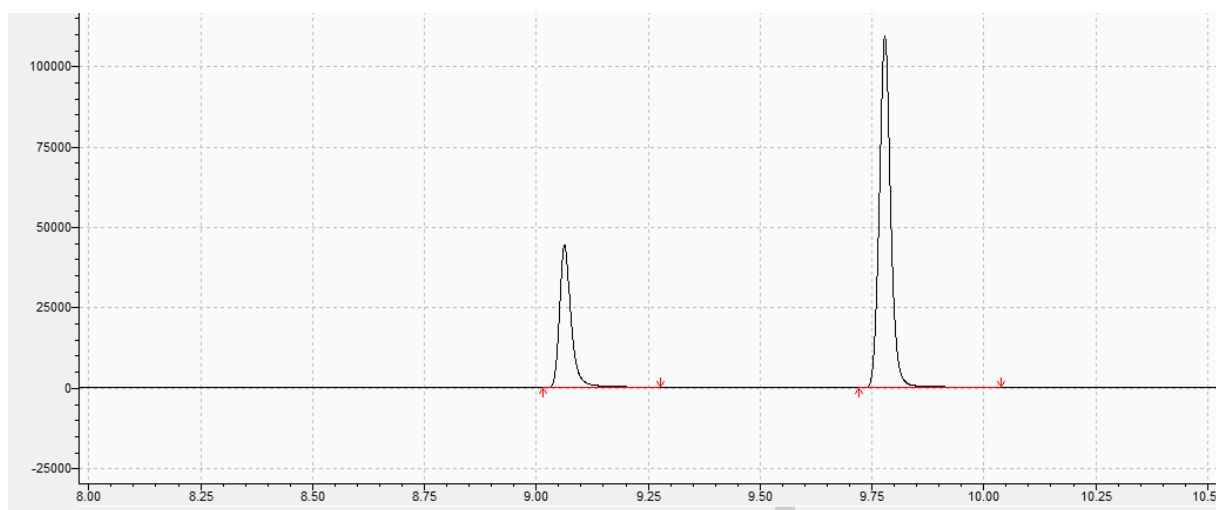

| Retention time | area   |          | I/b ratio |
|----------------|--------|----------|-----------|
| 9,063          | 80319  | Branched | 2,39      |
| 9,779          | 192015 | linear   |           |

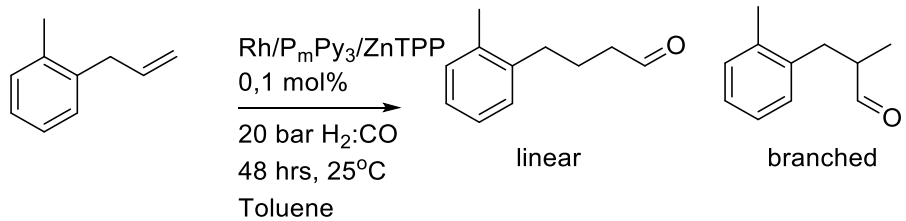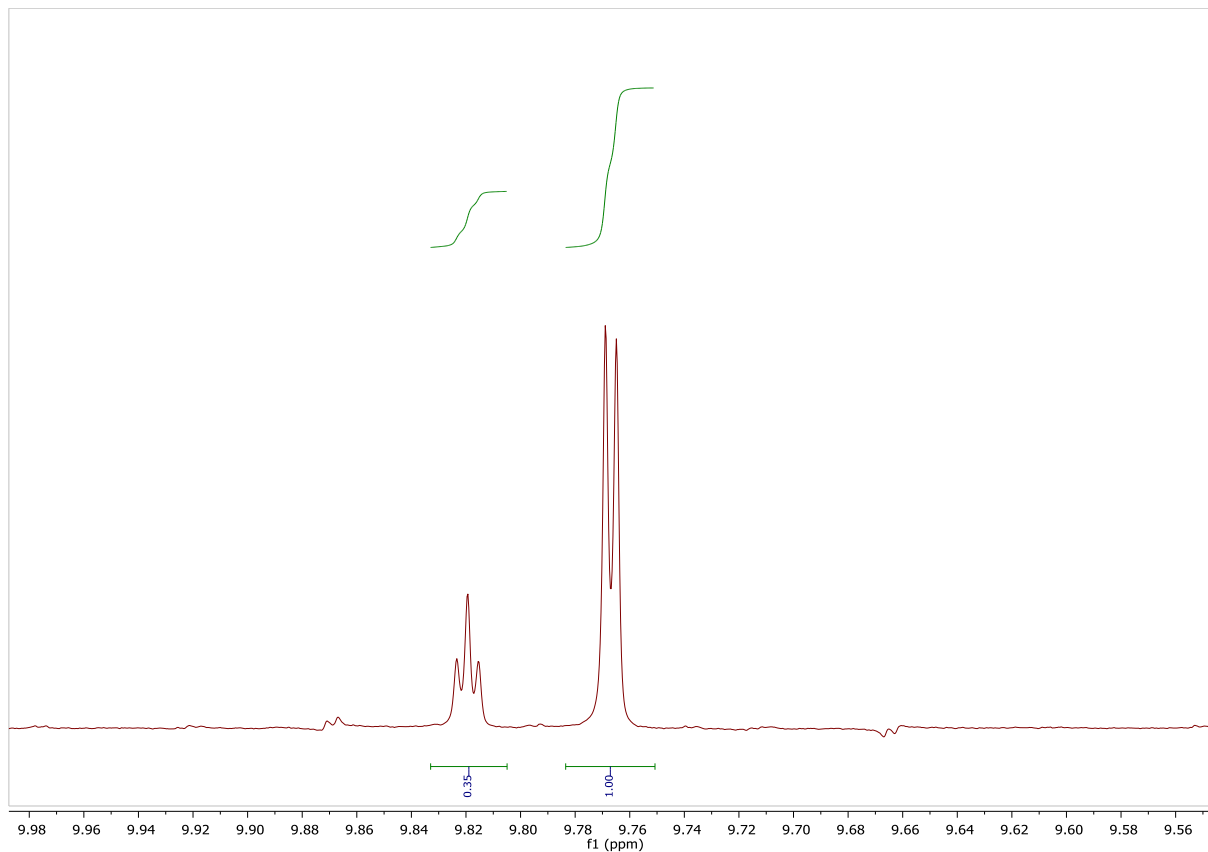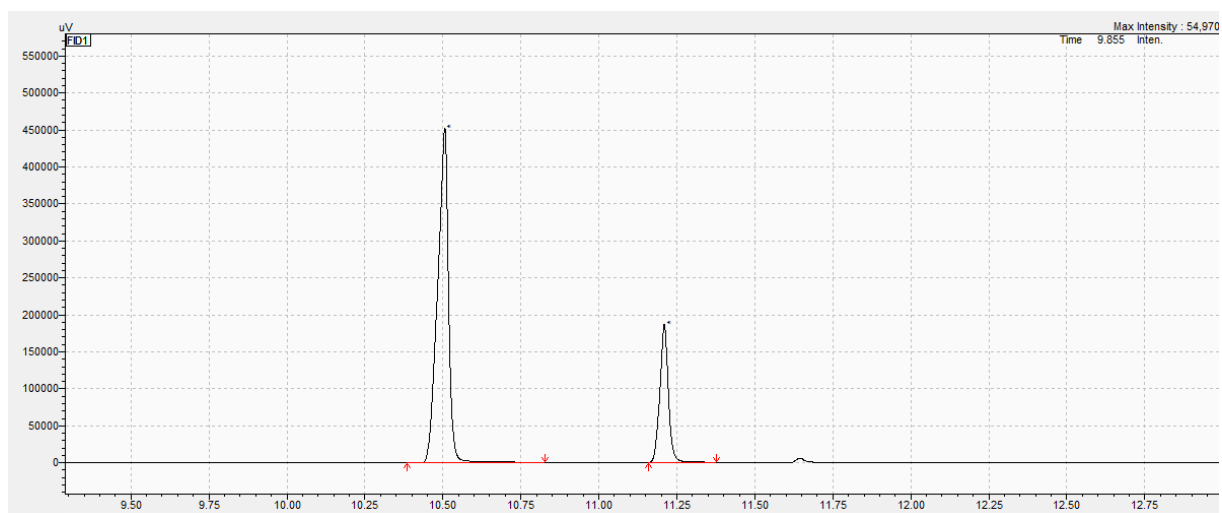

| Retention time | area    |          | l/b ratio |
|----------------|---------|----------|-----------|
| 10.506         | 1090548 | Branched | 0.32      |
| 11.210         | 353117  | linear   |           |

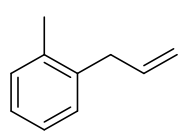

Rh/P<sub>m</sub>Py<sub>3</sub>  
 0,1 mol%  
 20 bar H<sub>2</sub>:CO  
 48 hrs, 25°C  
 Toluene

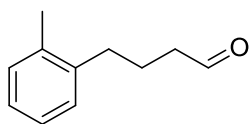

linear

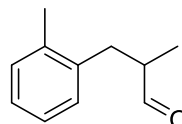

branched

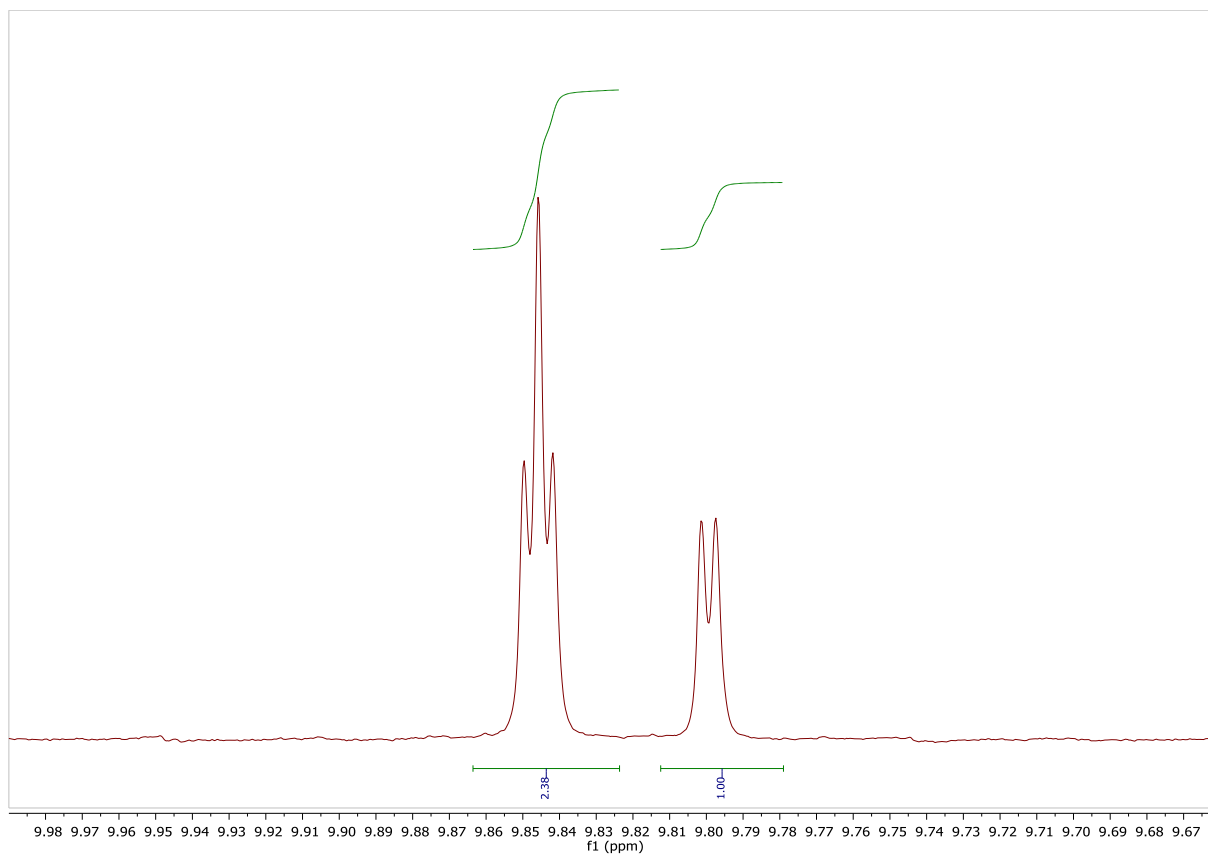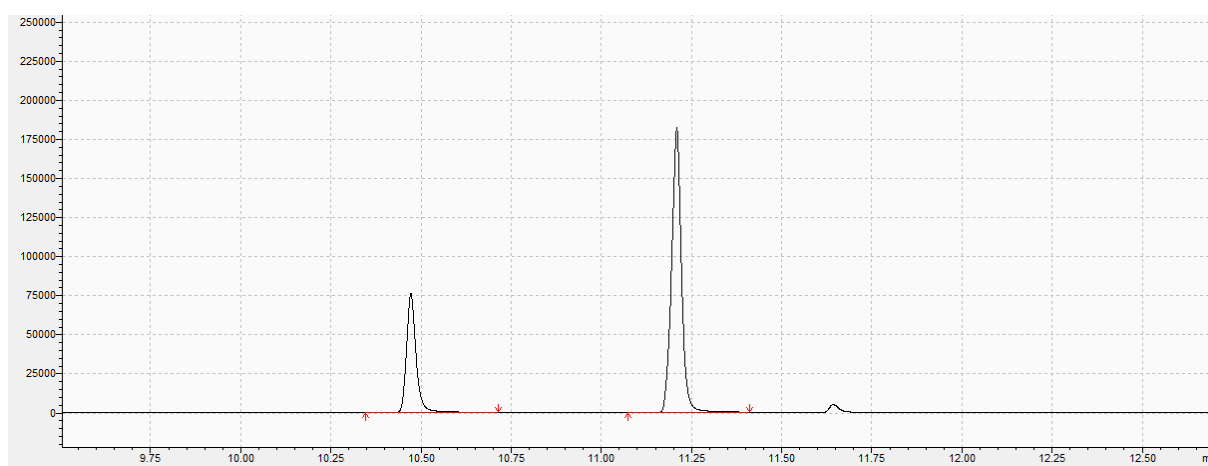

| Retention time | area   |          | l/b ratio |
|----------------|--------|----------|-----------|
| 10.472         | 140662 | Branched | 2.46      |
| 11.209         | 346380 | linear   |           |

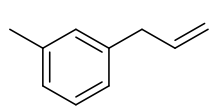

Rh/P<sub>m</sub>Py<sub>3</sub>/ZnTPP  
 0,1 mol%  
 20 bar H<sub>2</sub>:CO  
 48 hrs, 25°C  
 Toluene

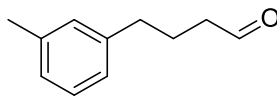

linear

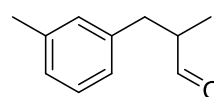

branched

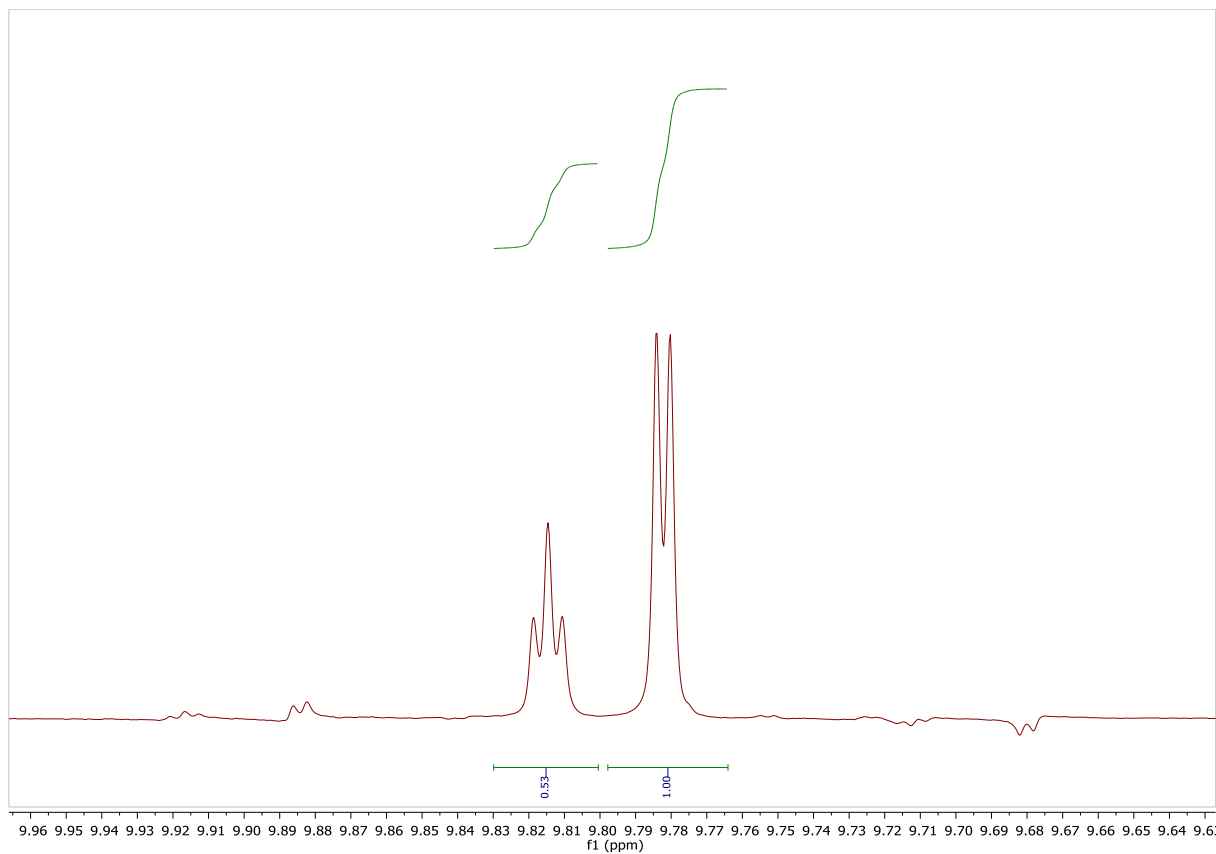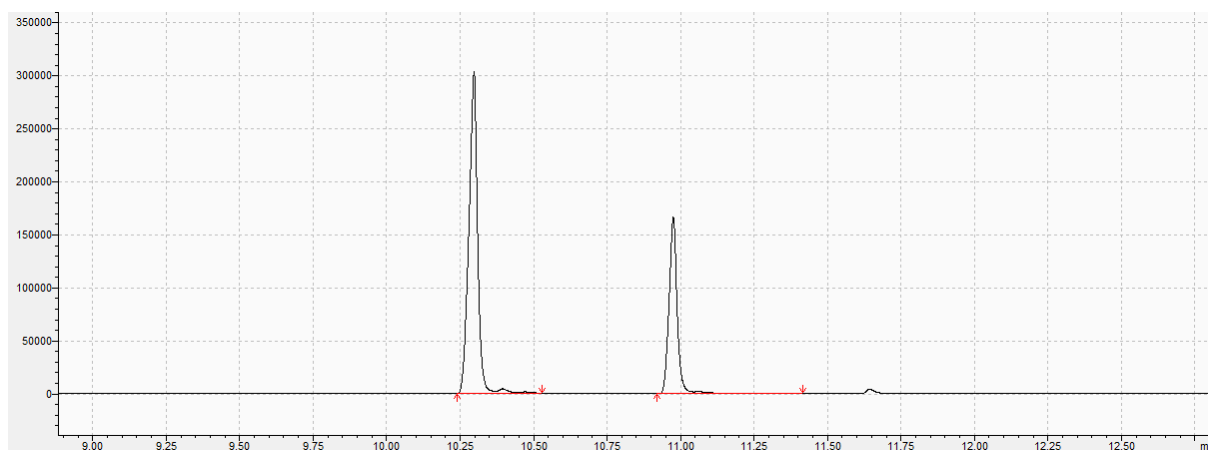

| Retention time | area   |          | l/b ratio |
|----------------|--------|----------|-----------|
| 10.297         | 631686 | Branched | 0.50      |
| 10.975         | 318492 | linear   |           |



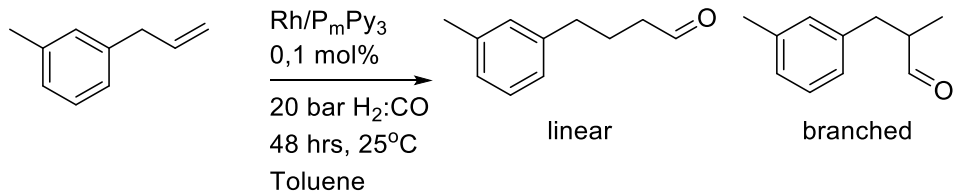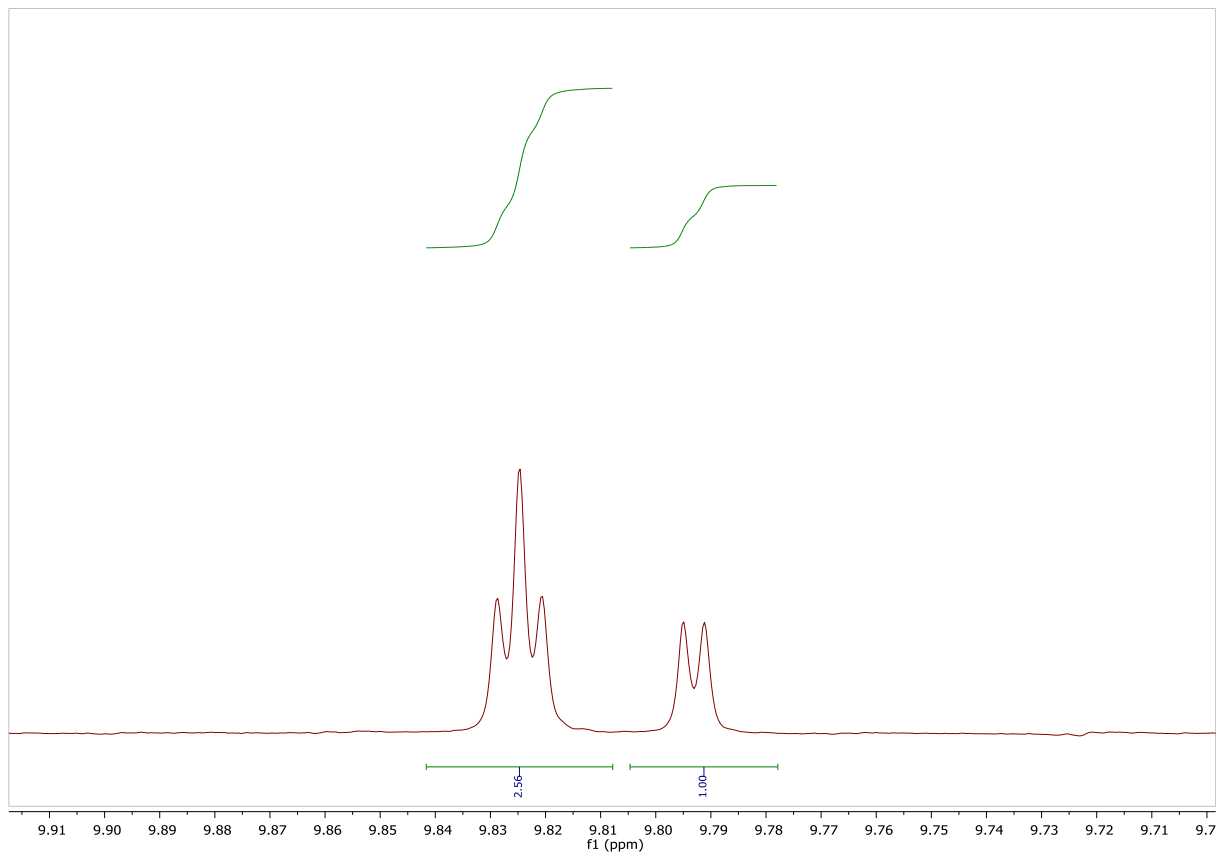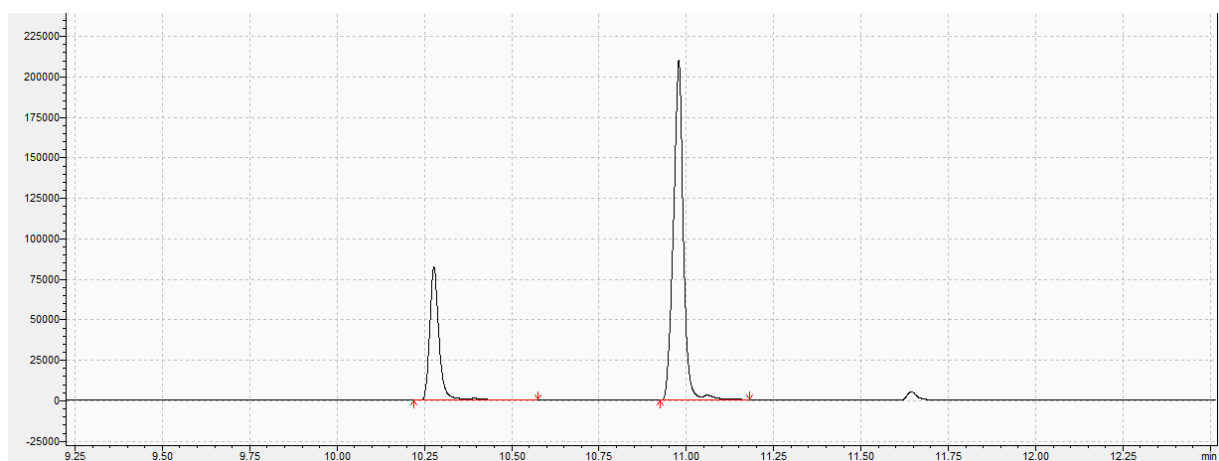

| Retention time | area   |          | l/b ratio |
|----------------|--------|----------|-----------|
| 10.278         | 153913 | Branched | 2.72      |
| 10.978         | 419454 | linear   |           |

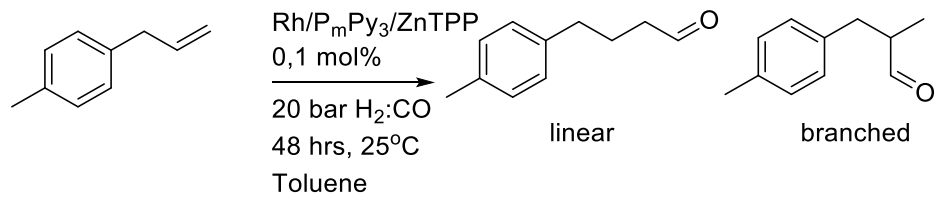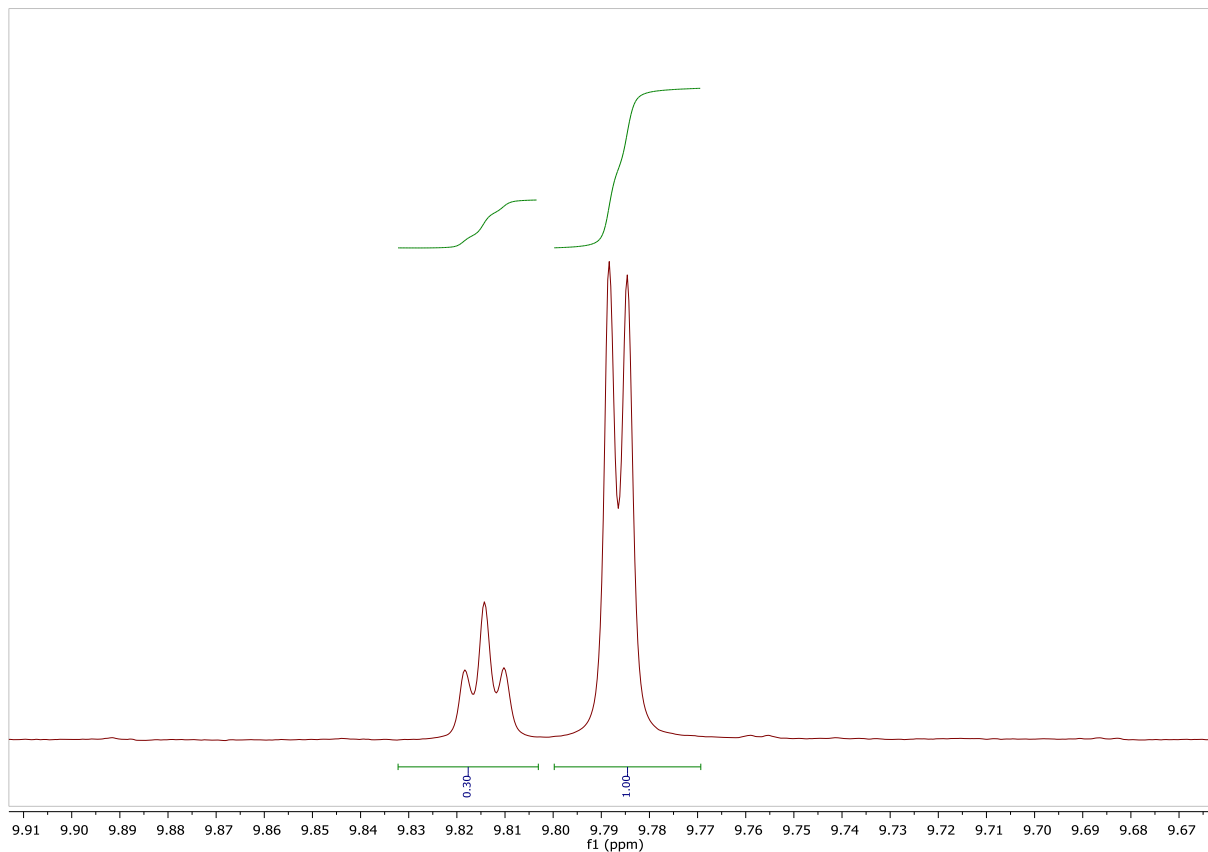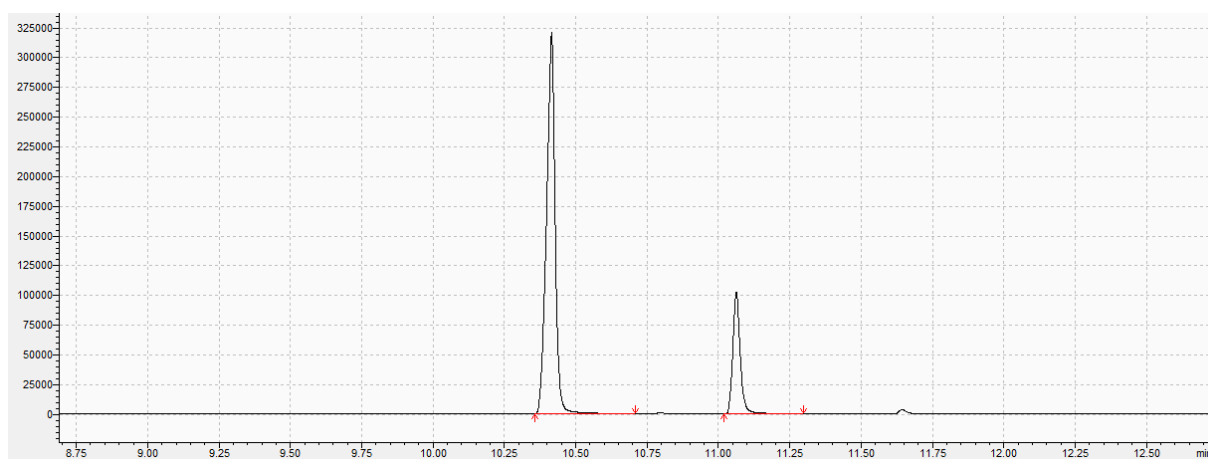

| Retention time | area   |          | l/b ratio |
|----------------|--------|----------|-----------|
| 10.415         | 673871 | Branched | 0.27      |
| 11.063         | 184421 | linear   |           |

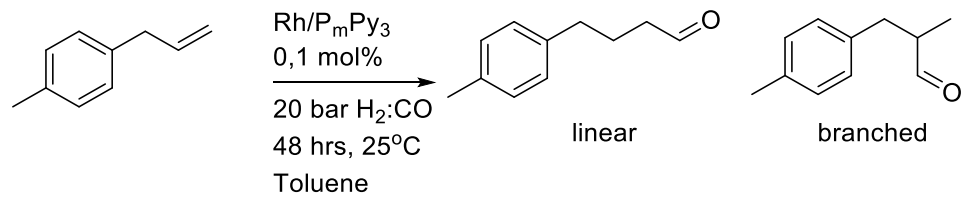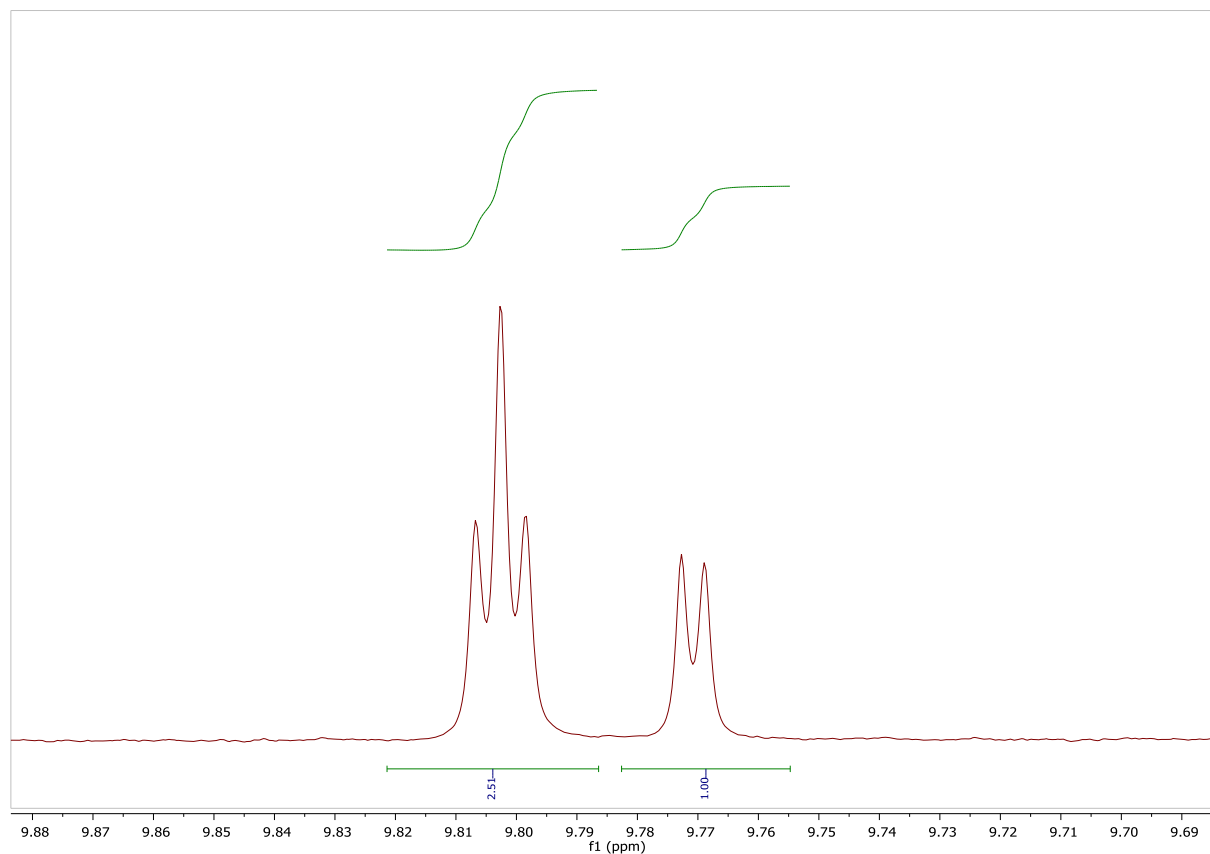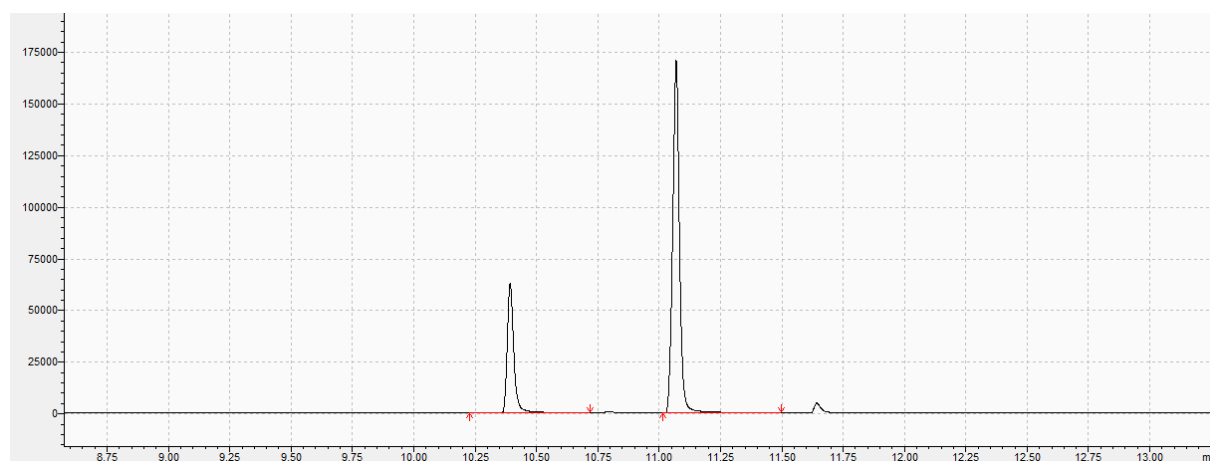

| Retention time | area   |          | l/b ratio |
|----------------|--------|----------|-----------|
| 10.393         | 117082 | Branched | 2.79      |
| 11.069         | 327655 | linear   |           |

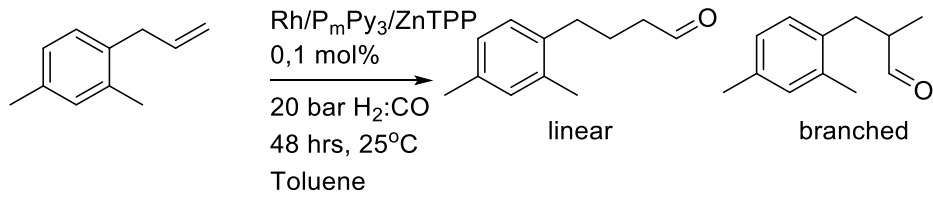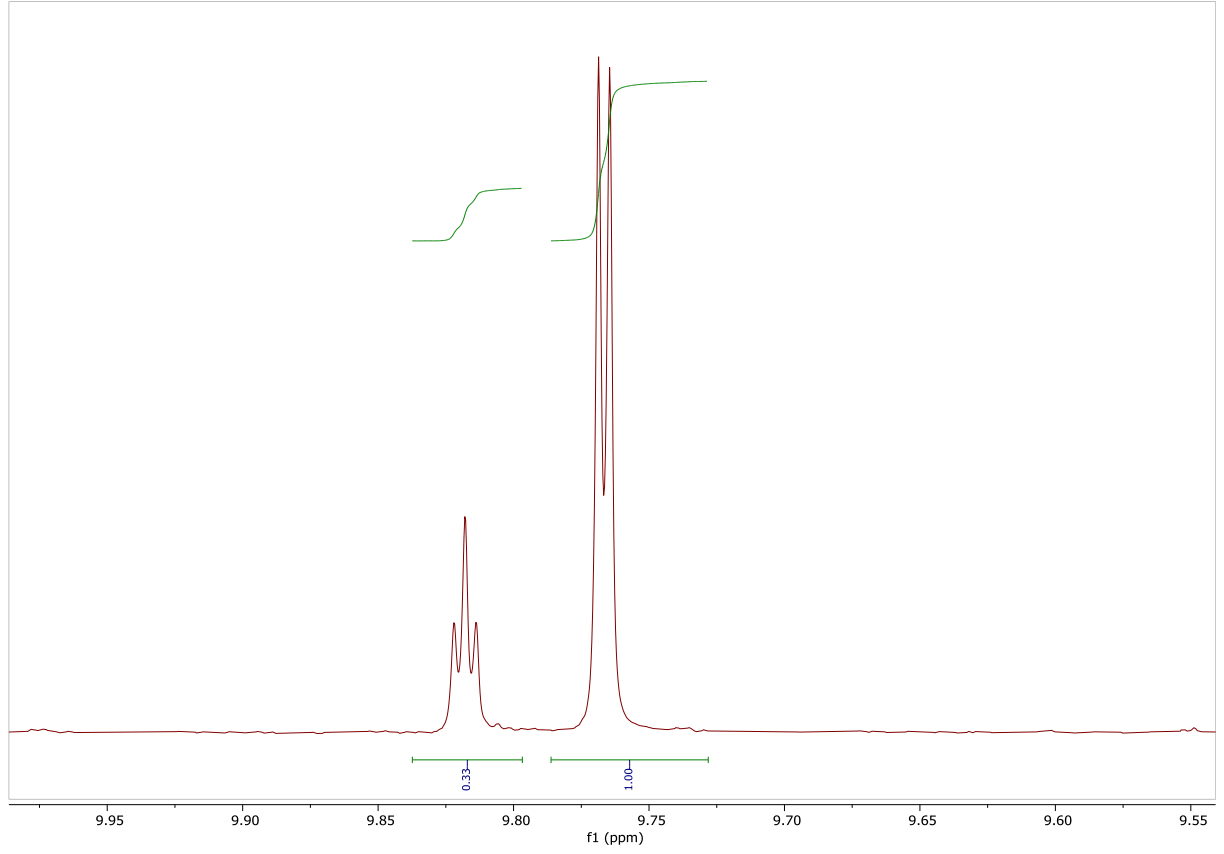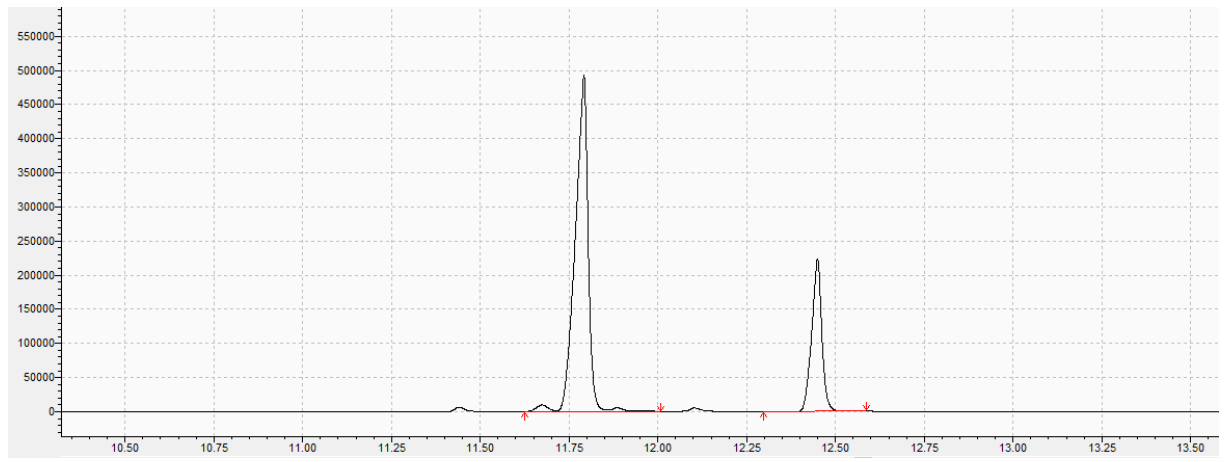

| Retention time | area    |          | l/b ratio |
|----------------|---------|----------|-----------|
| 11.791         | 1254642 | Branched | 0.34      |
| 12.449         | 437058  | linear   |           |

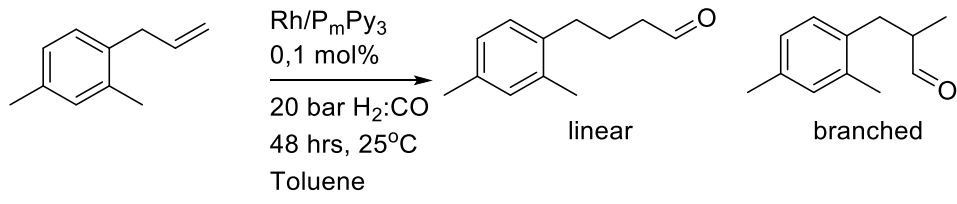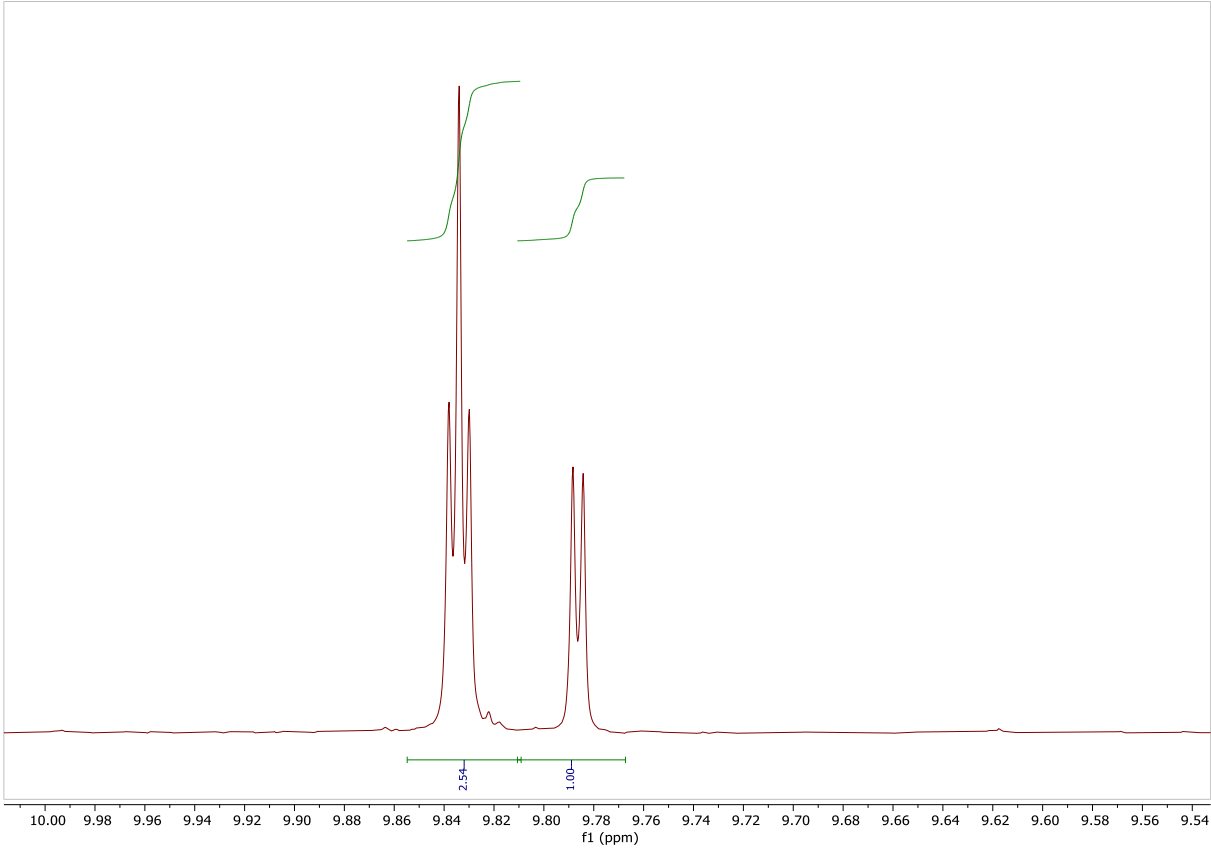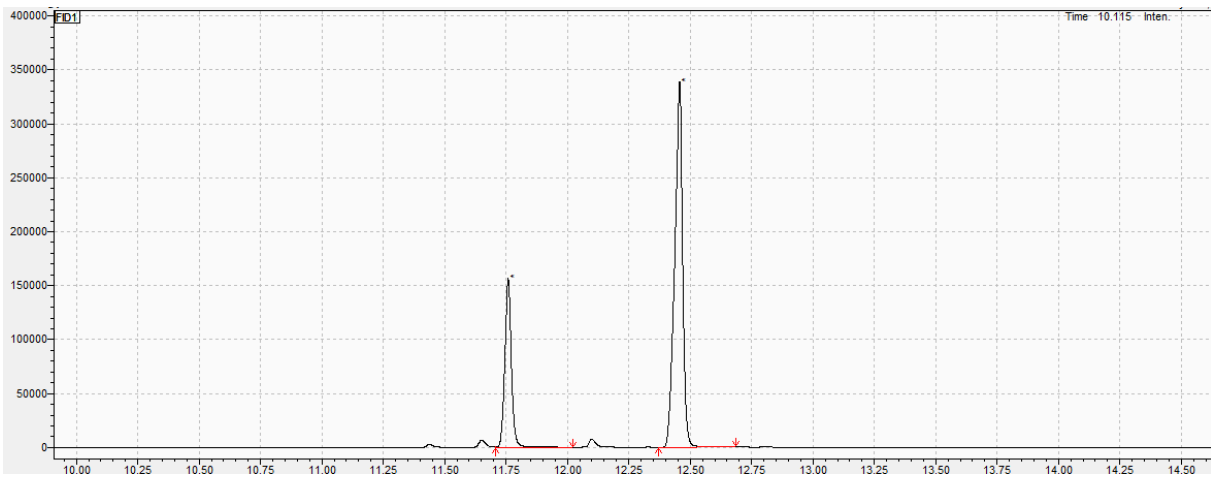

| Retention time | area   |          | I/b ratio |
|----------------|--------|----------|-----------|
| 11.759         | 289522 | Branched | 2.61      |
| 12.457         | 757073 | linear   |           |

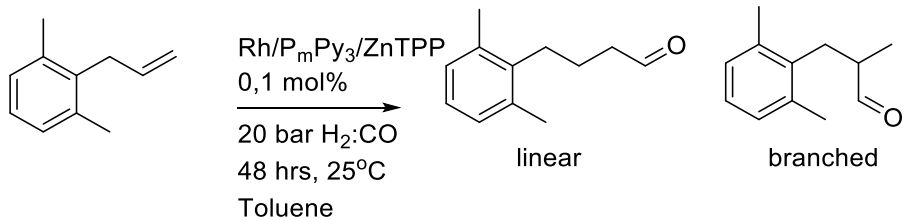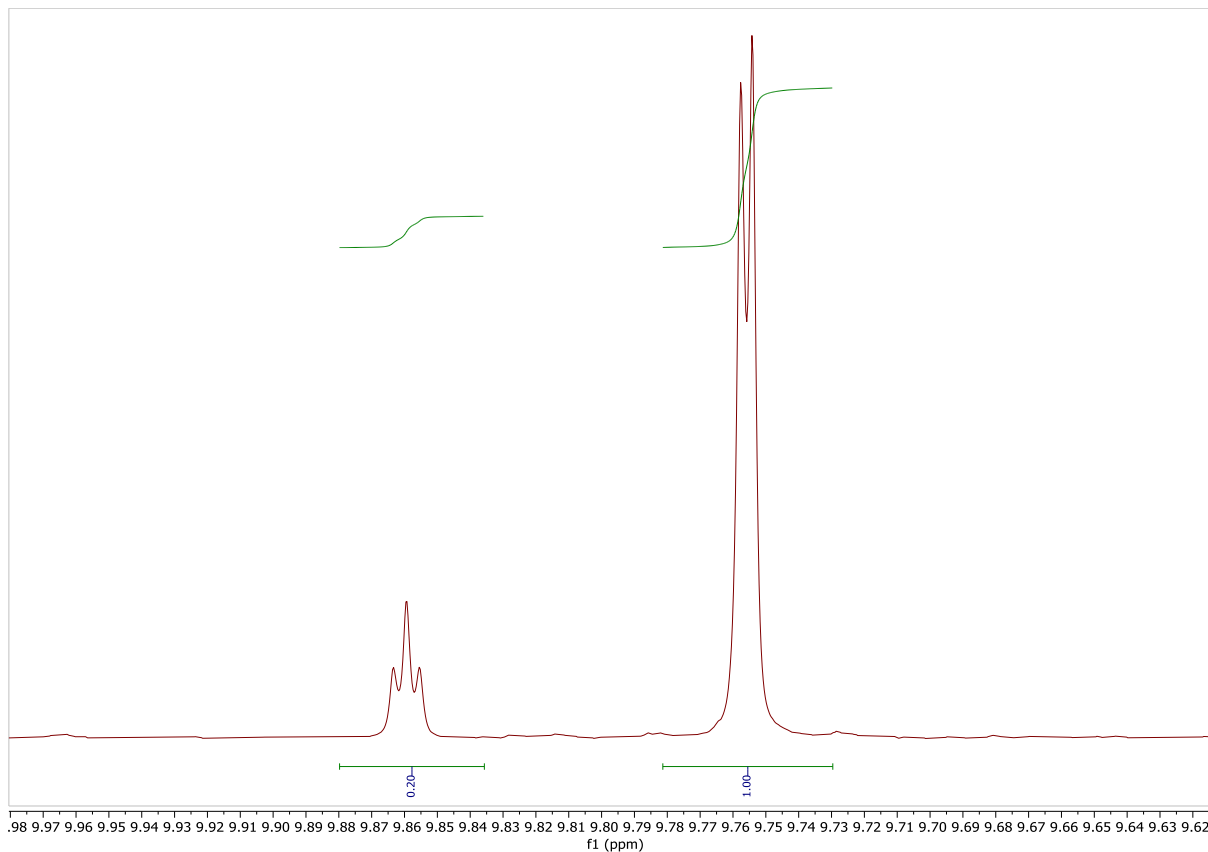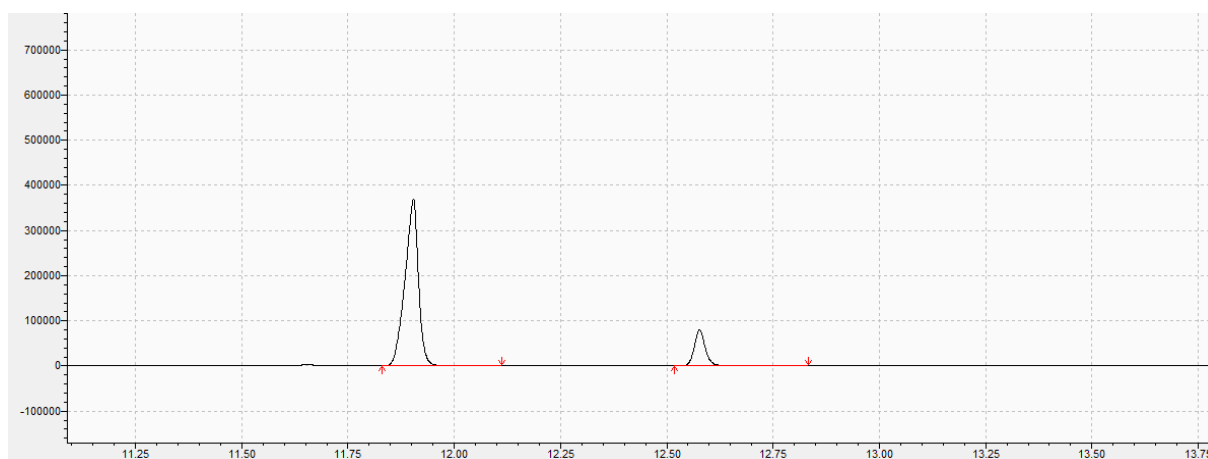

| Retention time | area   |          | I/b ratio |
|----------------|--------|----------|-----------|
| 11.903         | 815456 | Branched | 0.18      |
| 12.577         | 143108 | linear   |           |

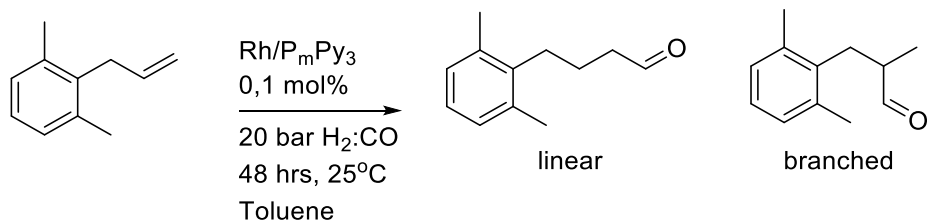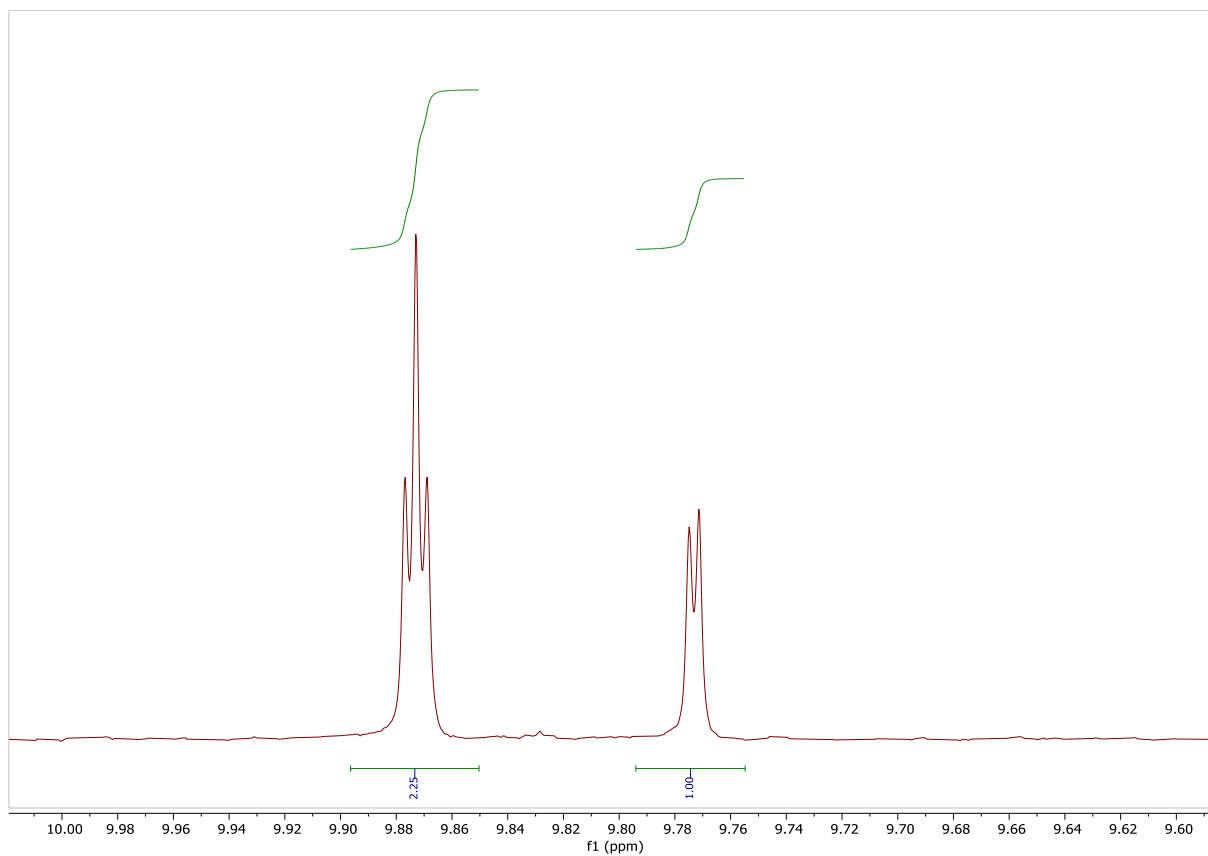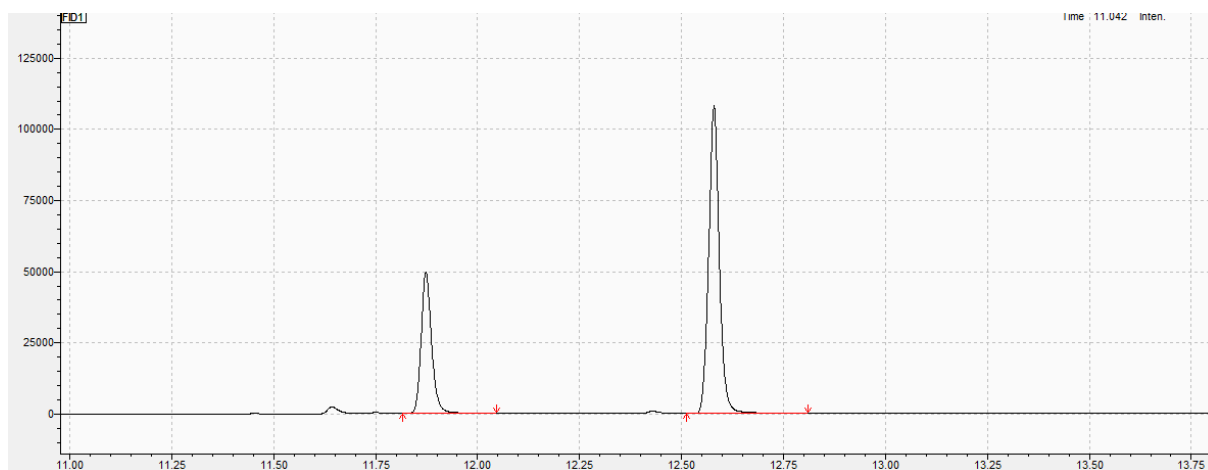

| Retention time | area   |          | I/b ratio |
|----------------|--------|----------|-----------|
| 11.873         | 88791  | Branched | 2.20      |
| 12.580         | 195099 | linear   |           |

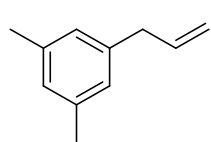

Rh/P<sub>m</sub>Py<sub>3</sub>/ZnTPP  
 0,1 mol%  
 20 bar H<sub>2</sub>:CO  
 48 hrs, 25°C  
 Toluene

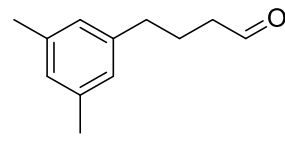

linear

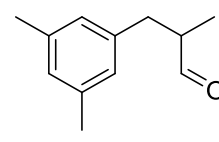

branched

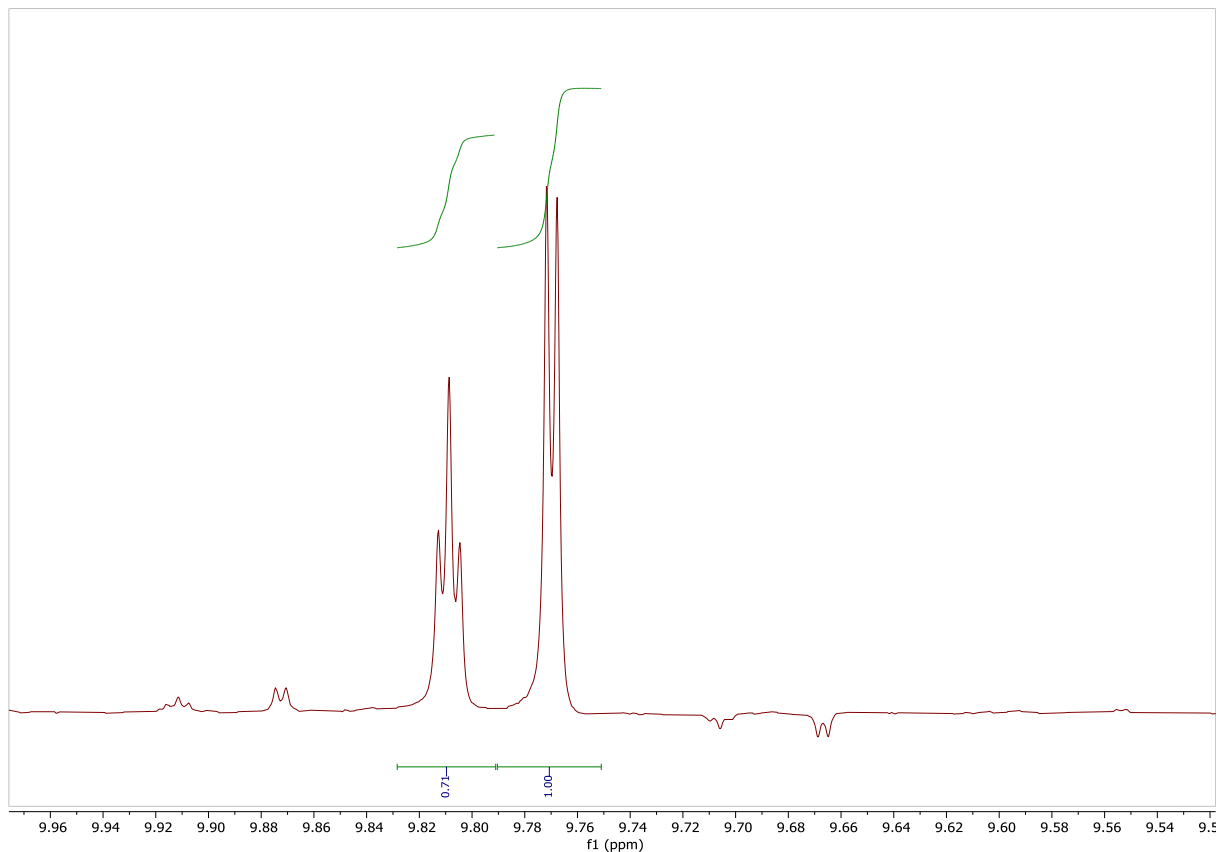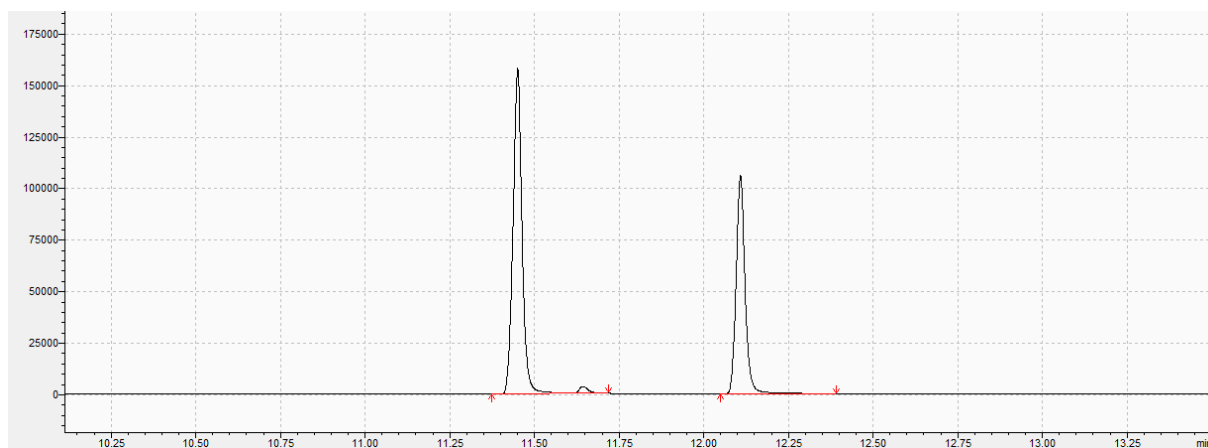

| Retention time | area   |          | I/b ratio |
|----------------|--------|----------|-----------|
| 11.450         | 299423 | Branched | 0.64      |
| 12.108         | 193961 | linear   |           |



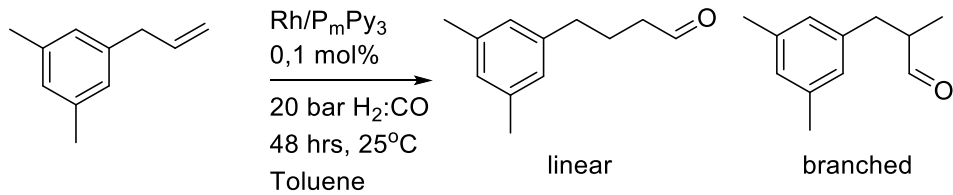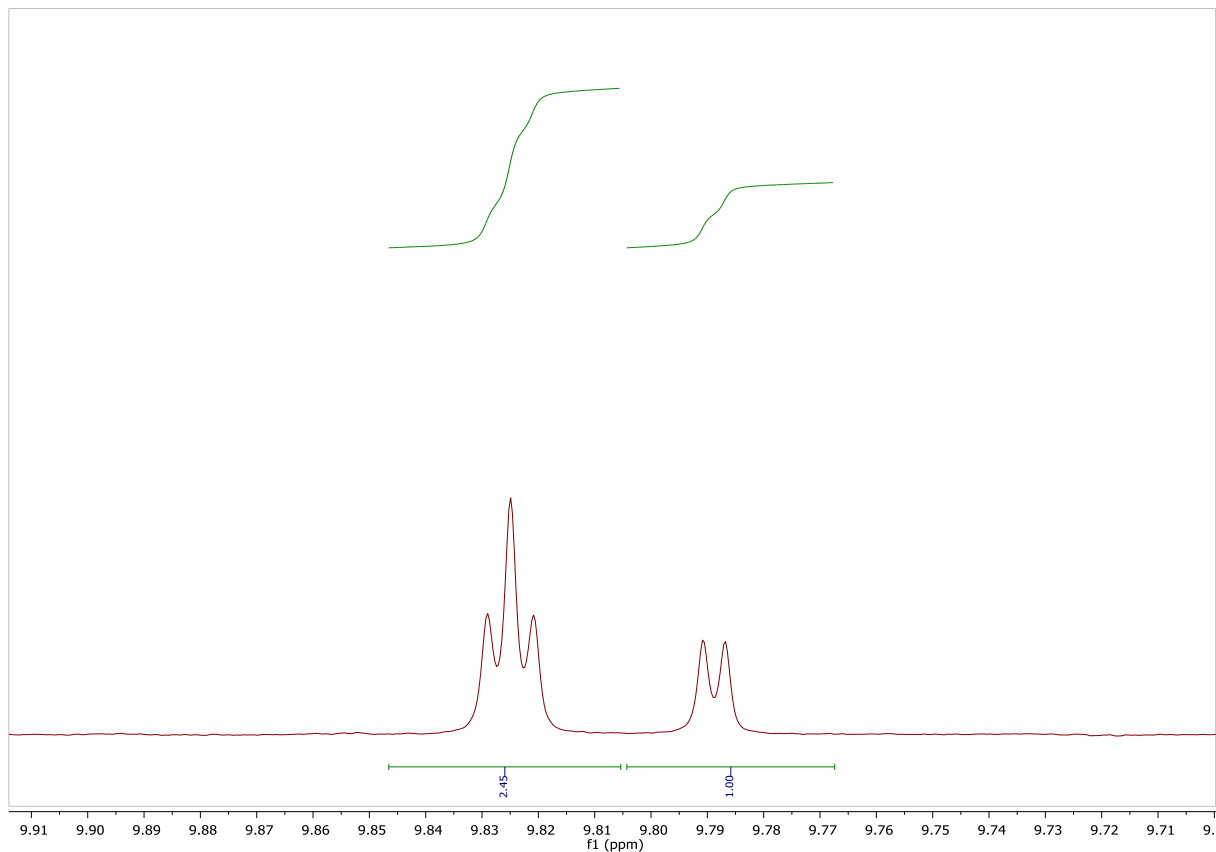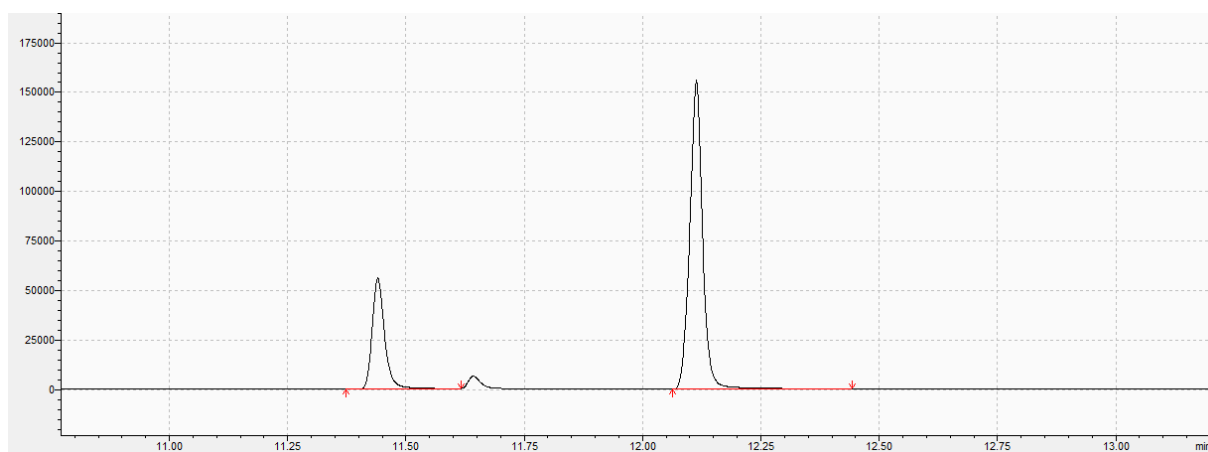

| Retention time | area   |          | l/b ratio |
|----------------|--------|----------|-----------|
| 11.441         | 102230 | Branched | 2.87      |
| 12.114         | 293548 | linear   |           |

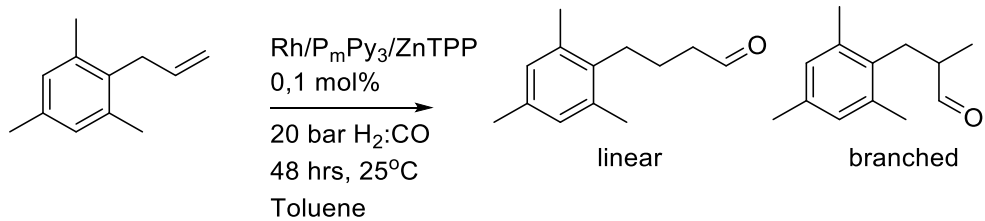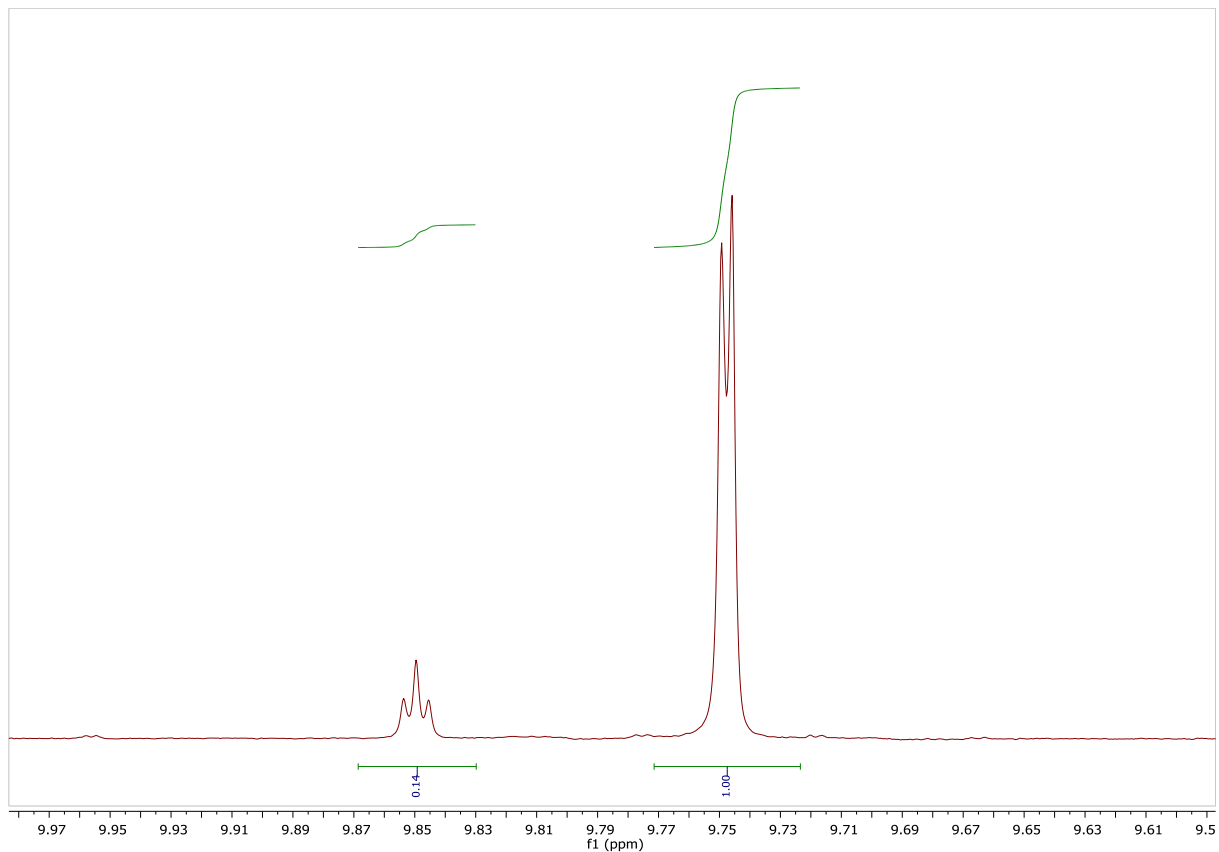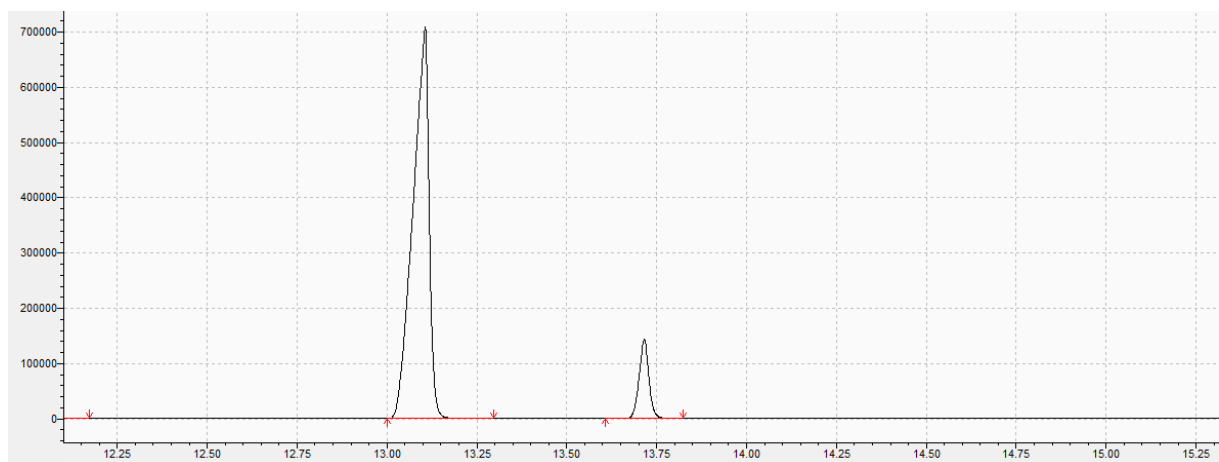

| Retention time | Area    |          | l/b ratio |
|----------------|---------|----------|-----------|
| 13.105         | 2202113 | Branched | 0.12      |
| 13.716         | 268013  | Linear   |           |

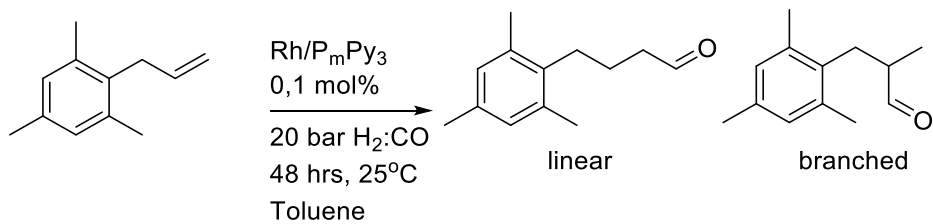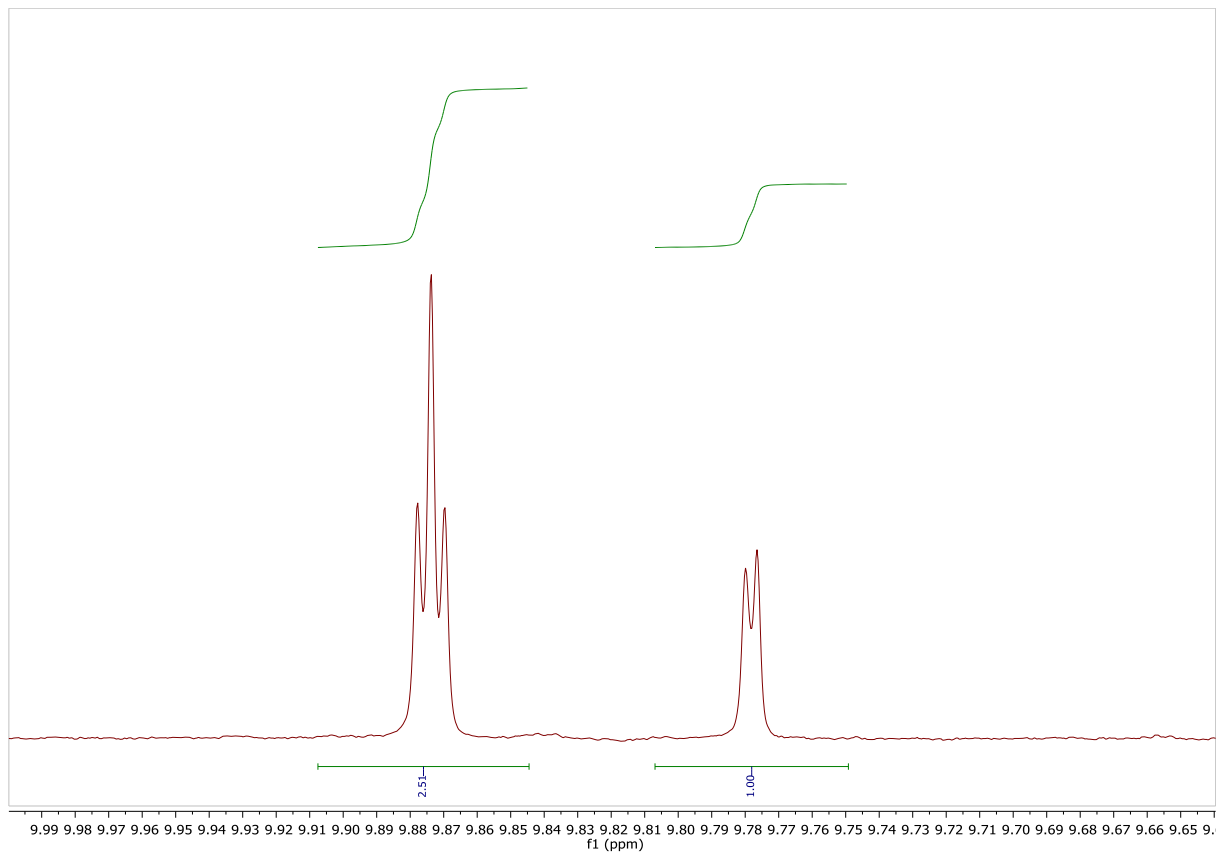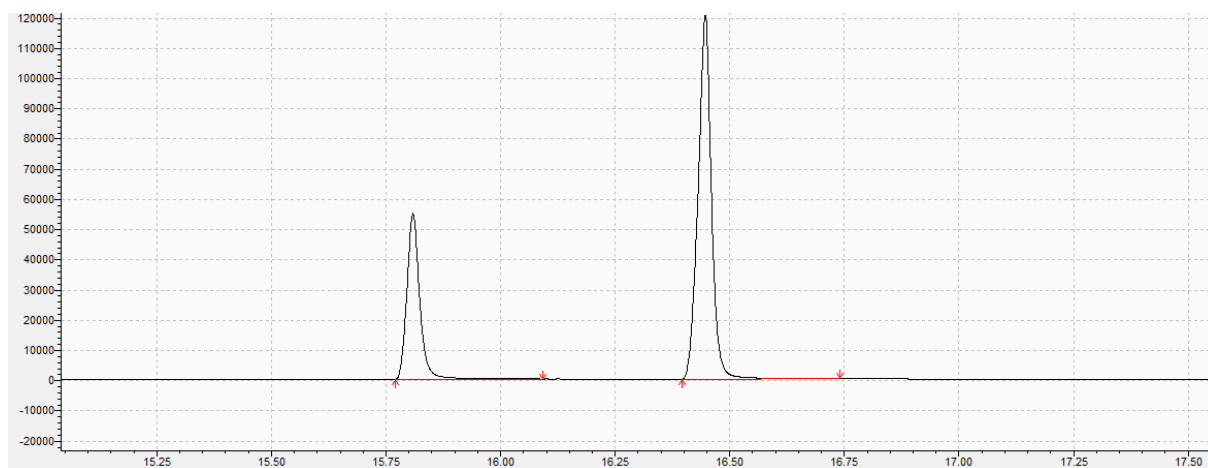

| Retention time | Area   |          | l/b ratio |
|----------------|--------|----------|-----------|
| 13.045         | 132974 | Branched | 2.77      |
| 13.717         | 336991 | Linear   |           |

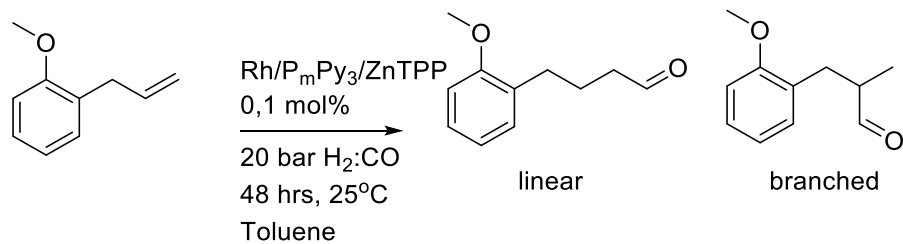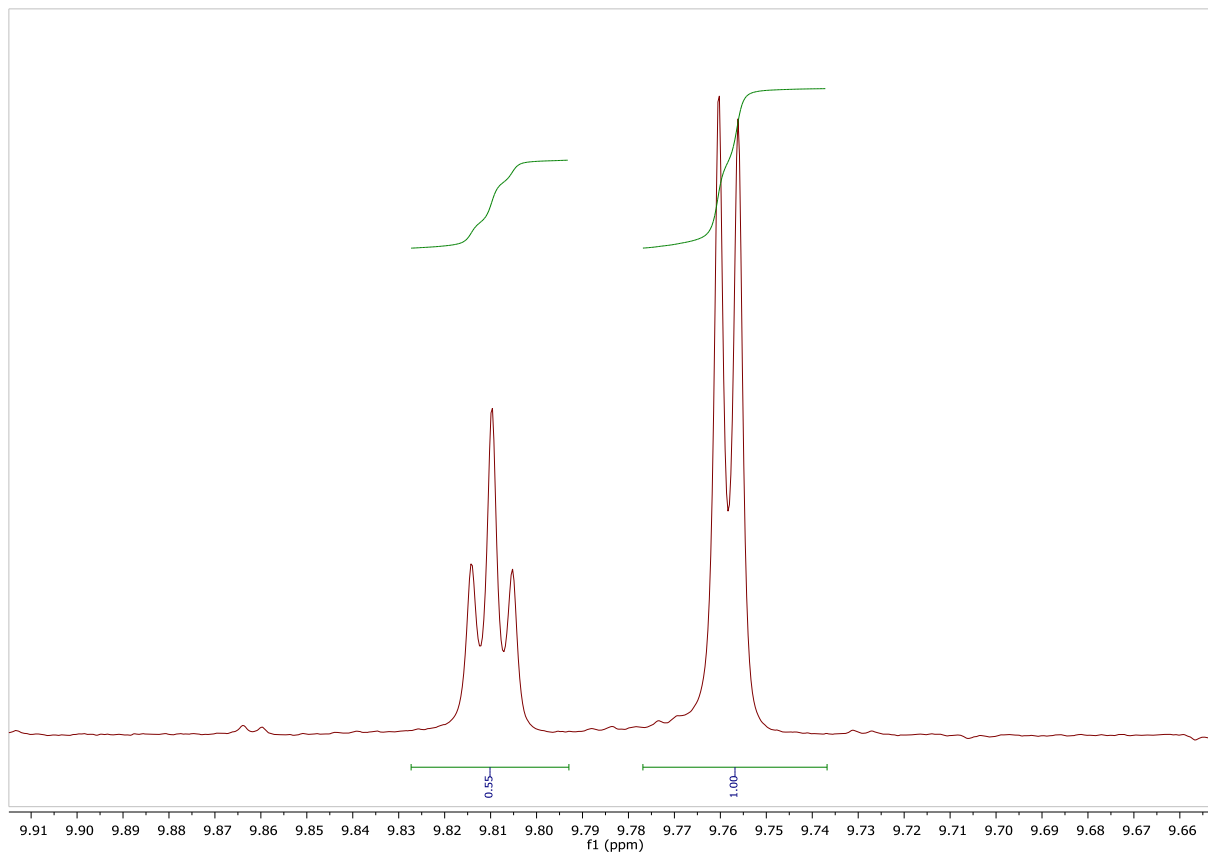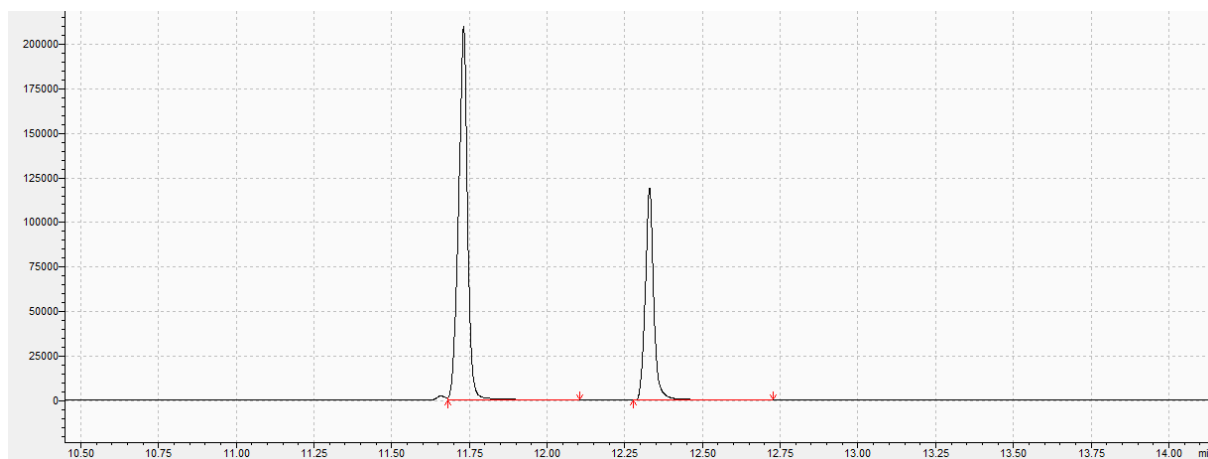

| Retention time | area   |          | l/b ratio |
|----------------|--------|----------|-----------|
| 11.731         | 424279 | Branched | 0.53      |
| 12.329         | 225839 | linear   |           |

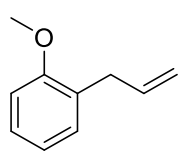

Rh/P<sub>m</sub>Py<sub>3</sub>  
 0,1 mol%  
 20 bar H<sub>2</sub>:CO  
 48 hrs, 25°C  
 Toluene

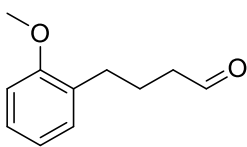

linear

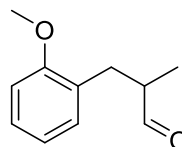

branched

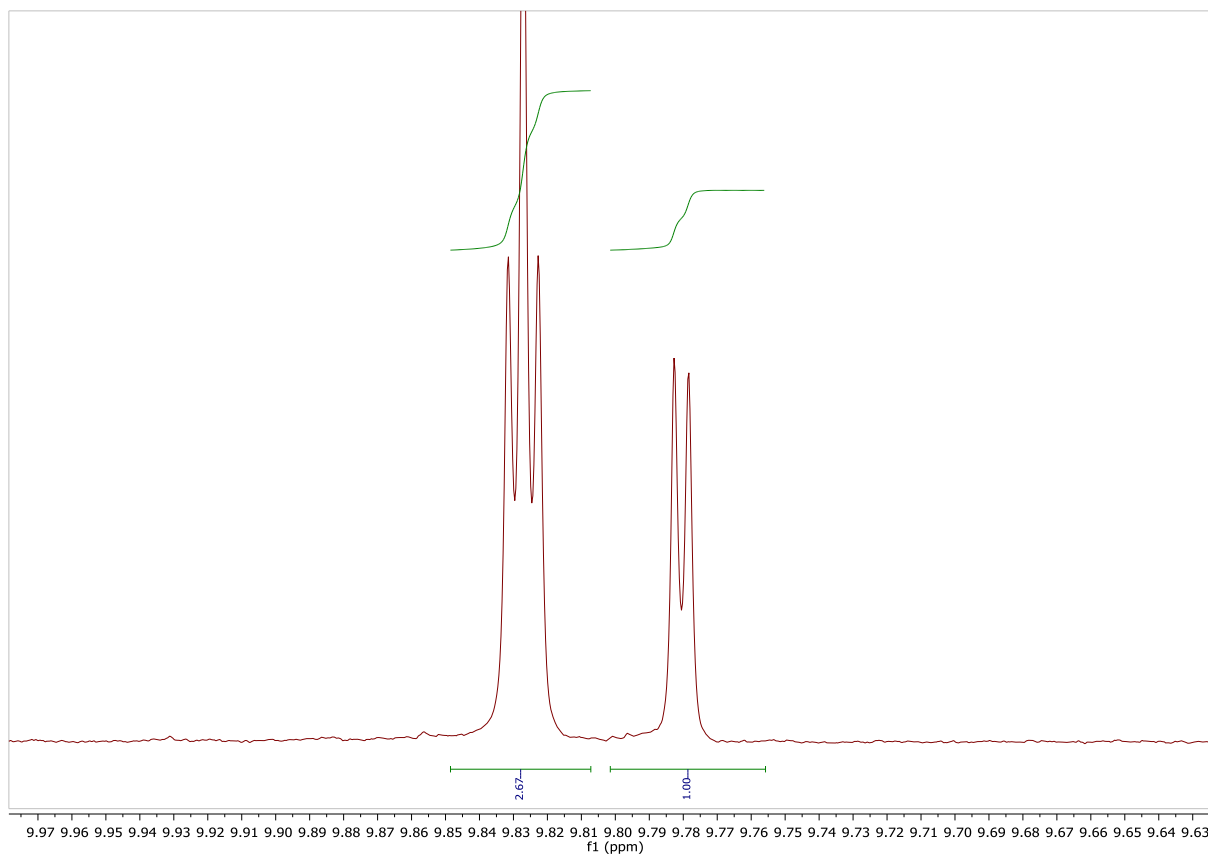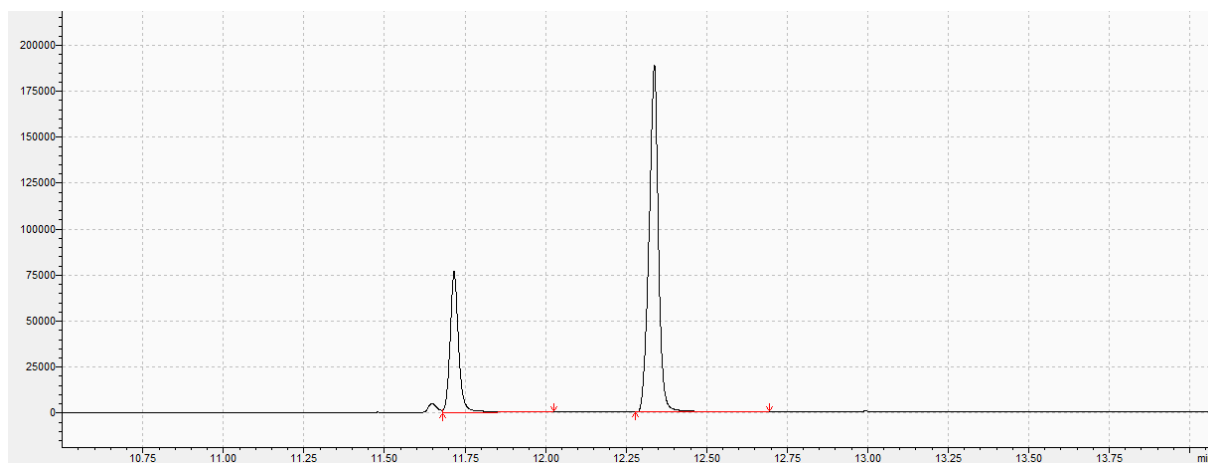

| Retention time | area   |          | l/b ratio |
|----------------|--------|----------|-----------|
| 11.716         | 139763 | Branched | 2.73      |
| 12.338         | 382820 | linear   |           |

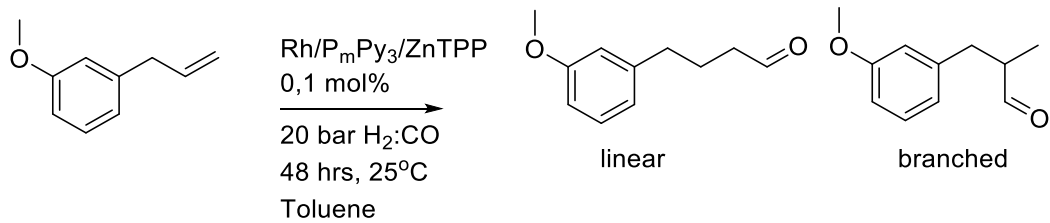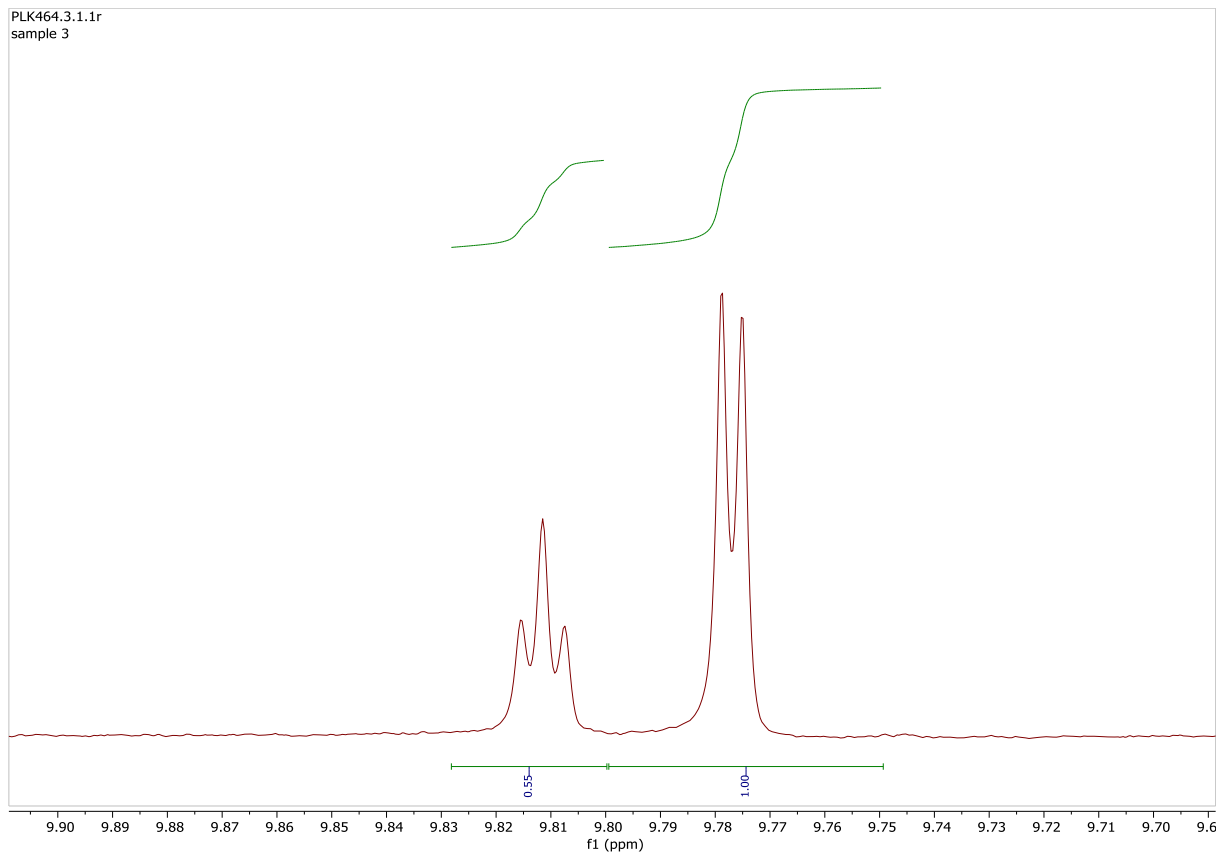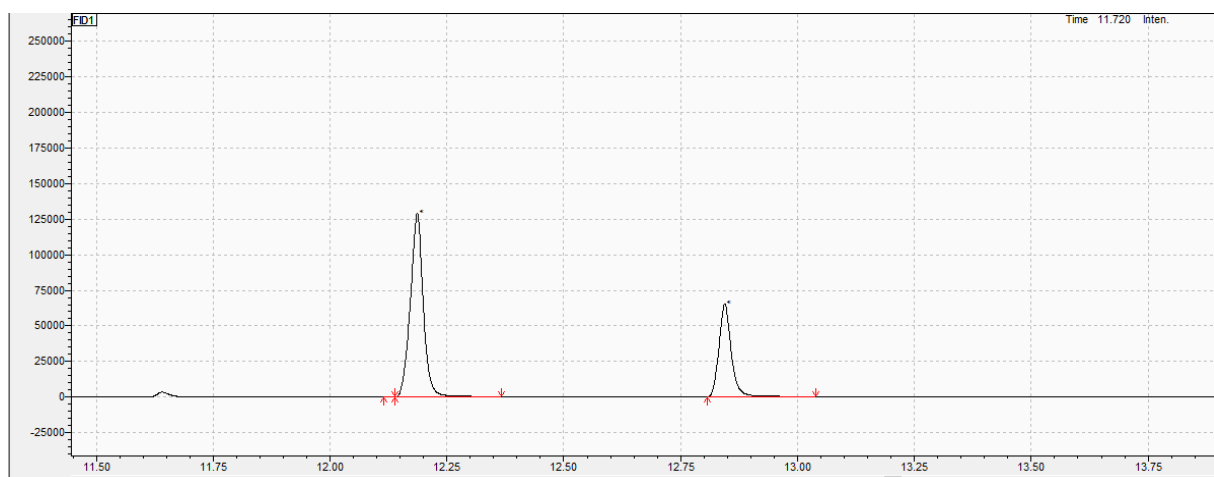

| Retention time | area   |          | l/b ratio |
|----------------|--------|----------|-----------|
| 12.187         | 247202 | Branched | 0.49      |
| 12.845         | 121414 | linear   |           |

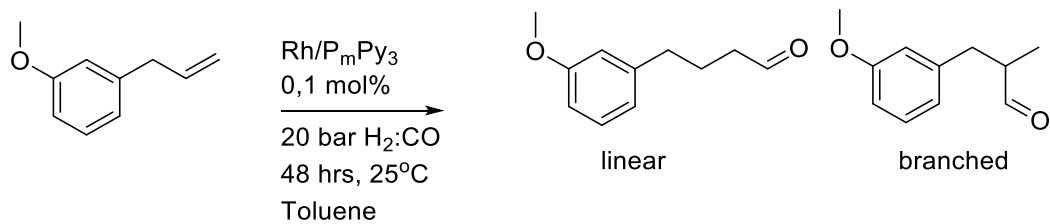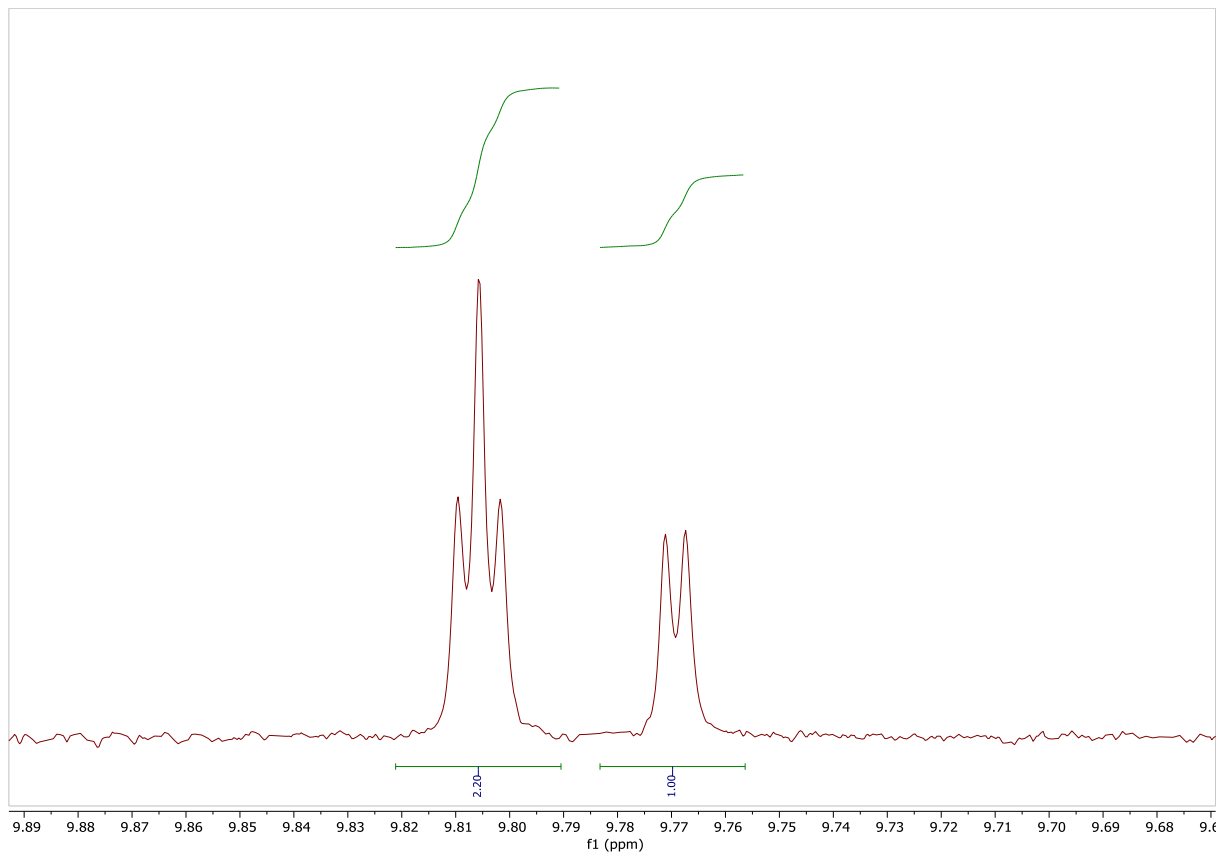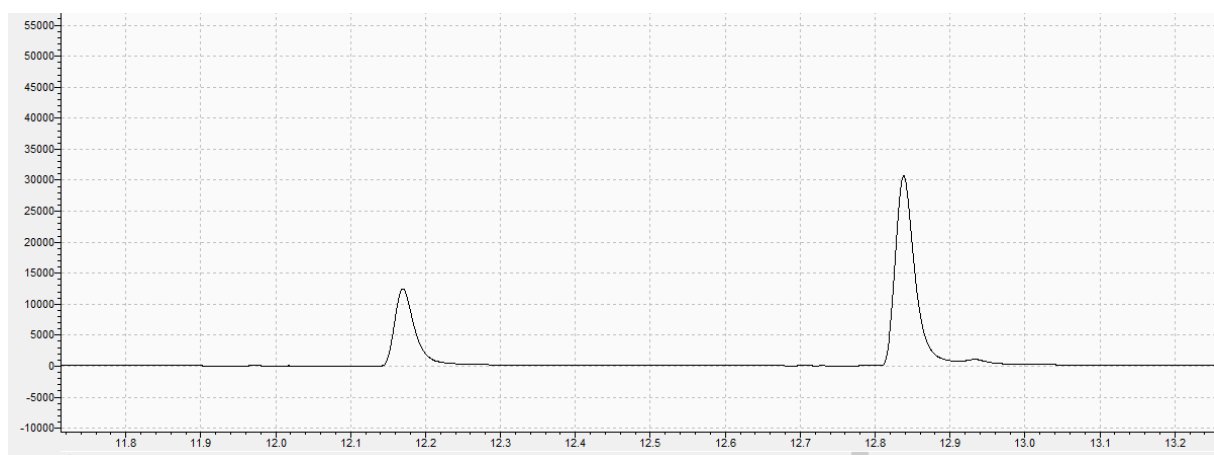

| Retention time | area  |          | l/b ratio |
|----------------|-------|----------|-----------|
| 12.170         | 23922 | Branched | 2.39      |
| 12.838         | 57327 | linear   |           |

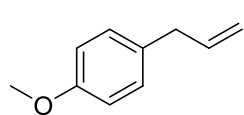

Rh/P<sub>m</sub>Py<sub>3</sub>/ZnTPP  
 0,1 mol%  
 20 bar H<sub>2</sub>:CO  
 48 hrs, 25°C  
 Toluene

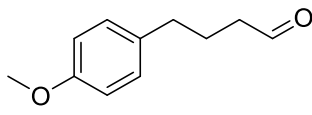

linear

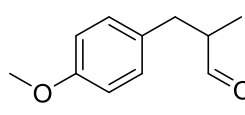

branched

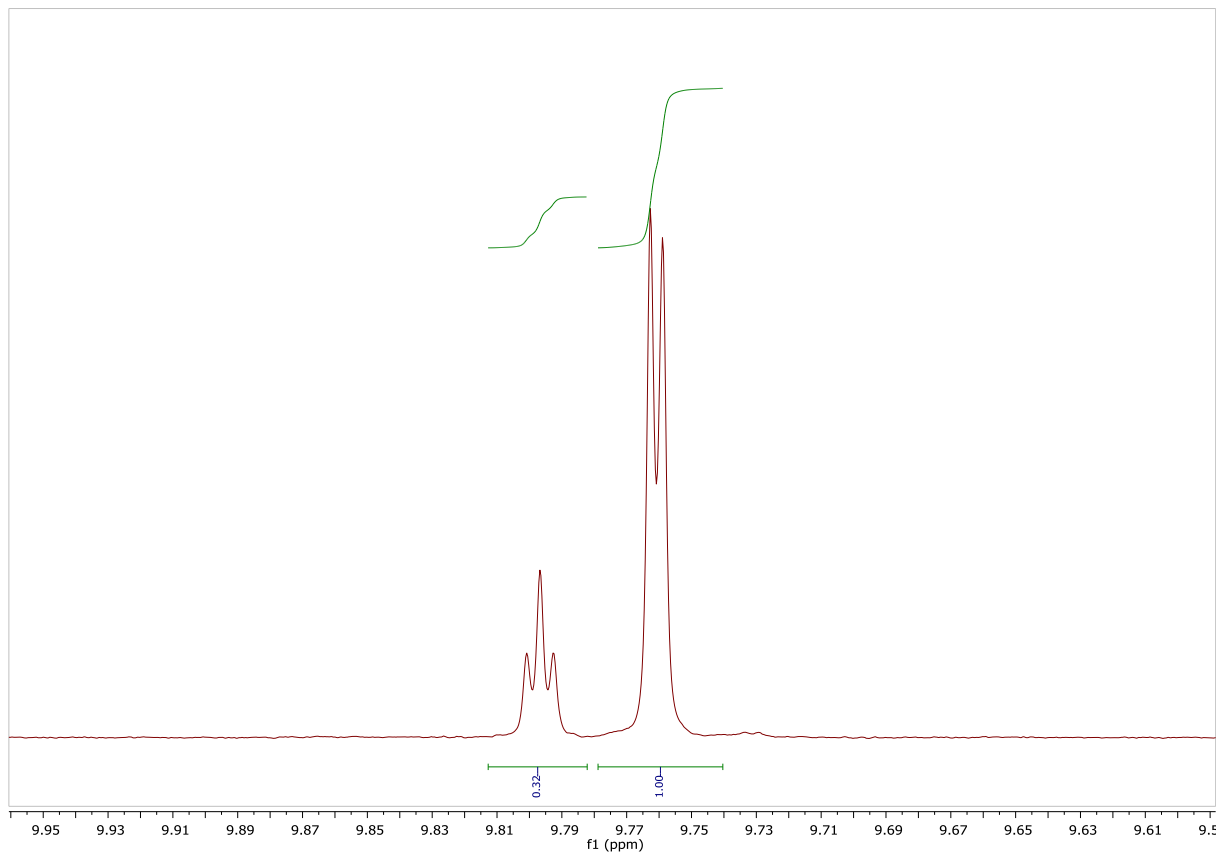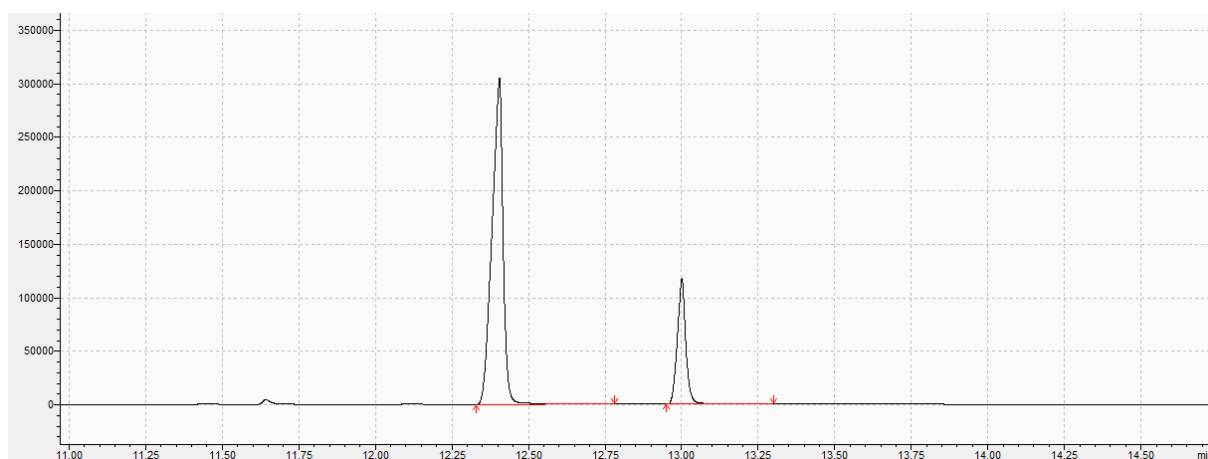

| Retention time | area   |          | l/b ratio |
|----------------|--------|----------|-----------|
| 12.405         | 762404 | Branched | 0.29      |
| 13.001         | 225848 | linear   |           |



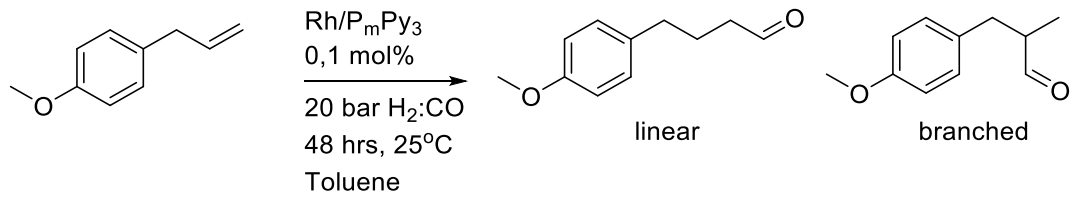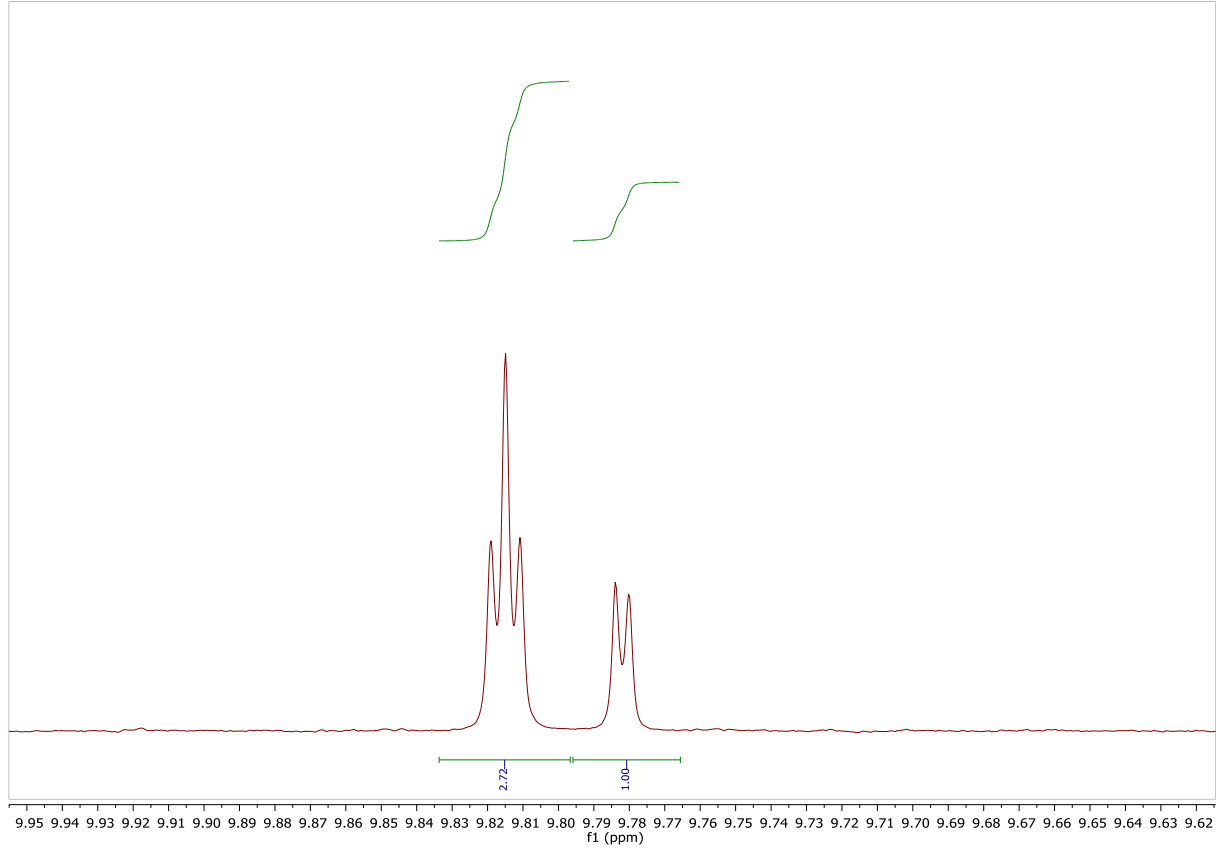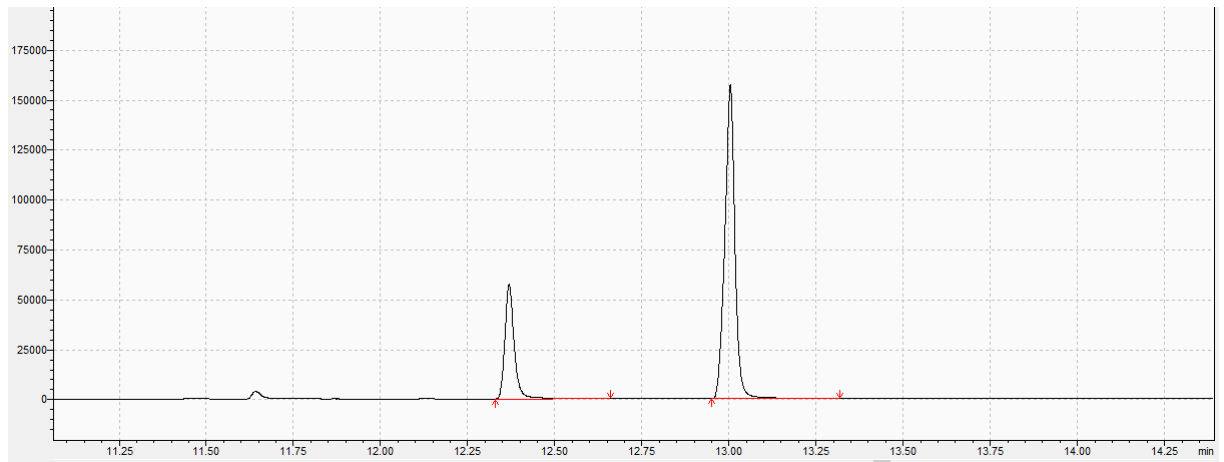

| Retention time | area   |          | I/b ratio |
|----------------|--------|----------|-----------|
| 12.369         | 106661 | Branched | 2.96      |
| 13.004         | 316684 | linear   |           |

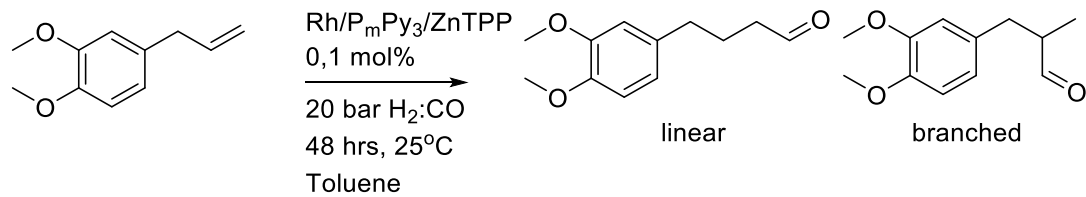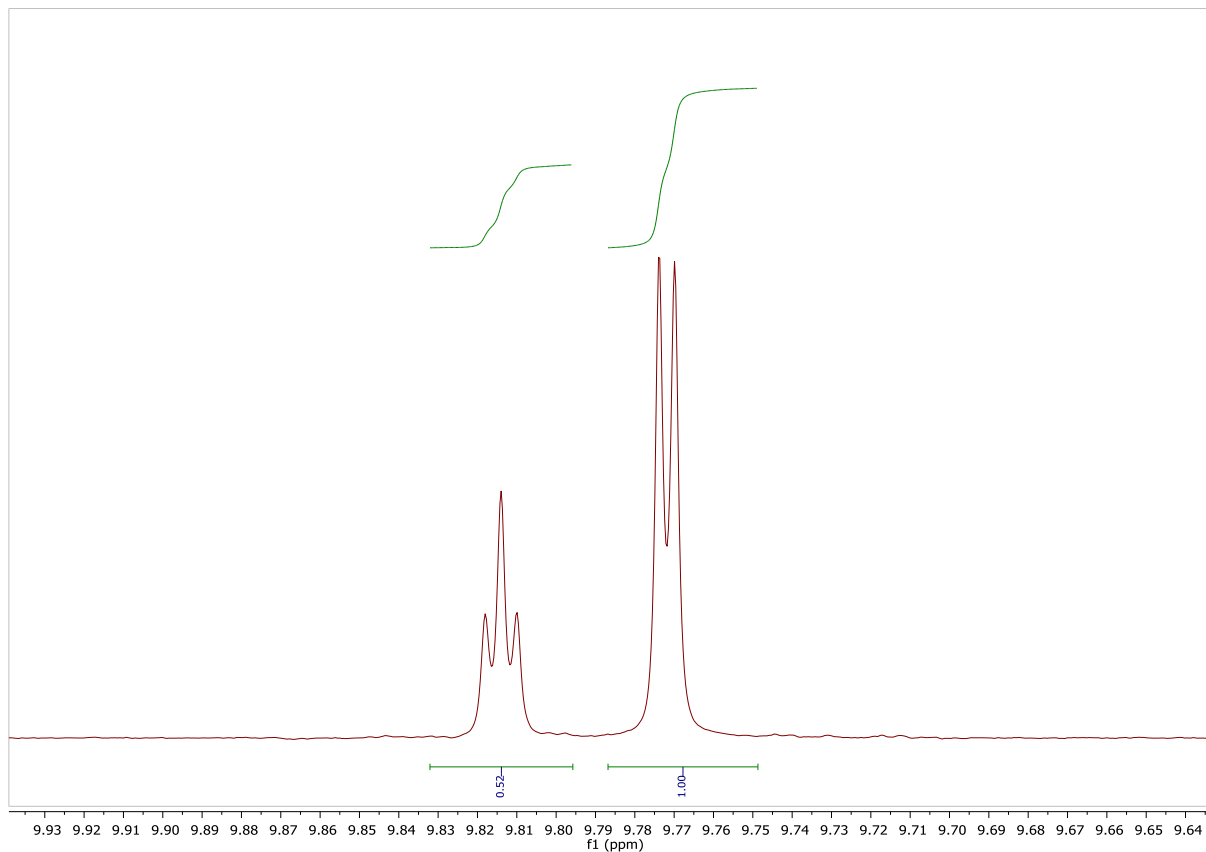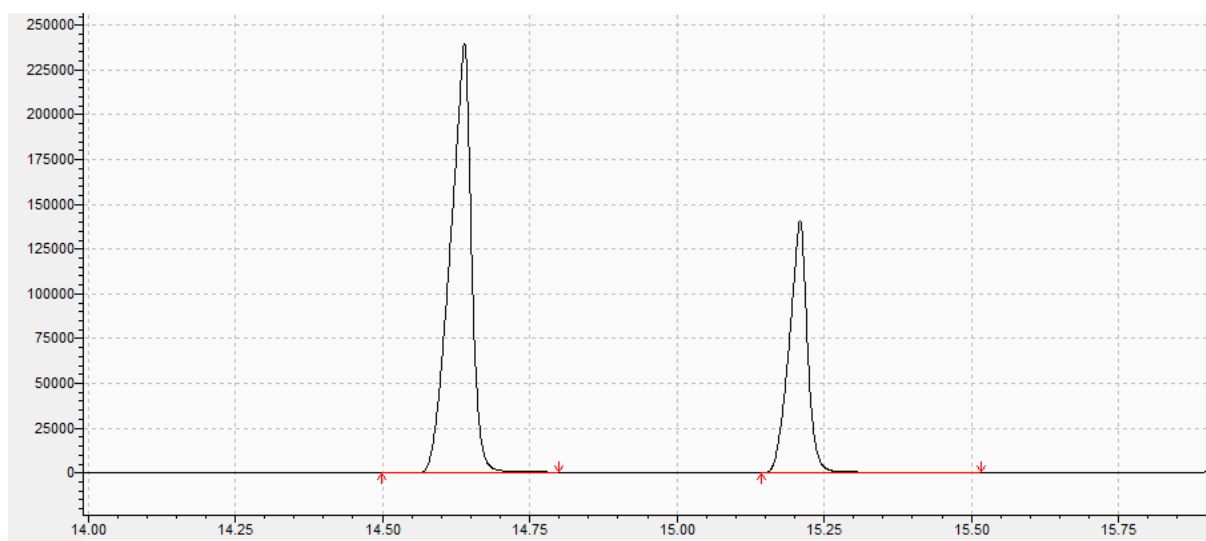

| Retention time | area   |          | l/b ratio |
|----------------|--------|----------|-----------|
| 14.639         | 597052 | Branched | 0.50      |
| 15.209         | 300990 | linear   |           |

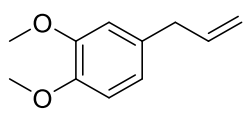

Rh/P<sub>m</sub>Py<sub>3</sub>  
 0,1 mol%  
 20 bar H<sub>2</sub>:CO  
 48 hrs, 25°C  
 Toluene

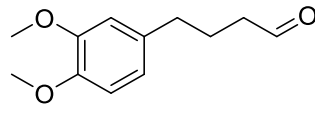

linear

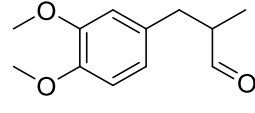

branched

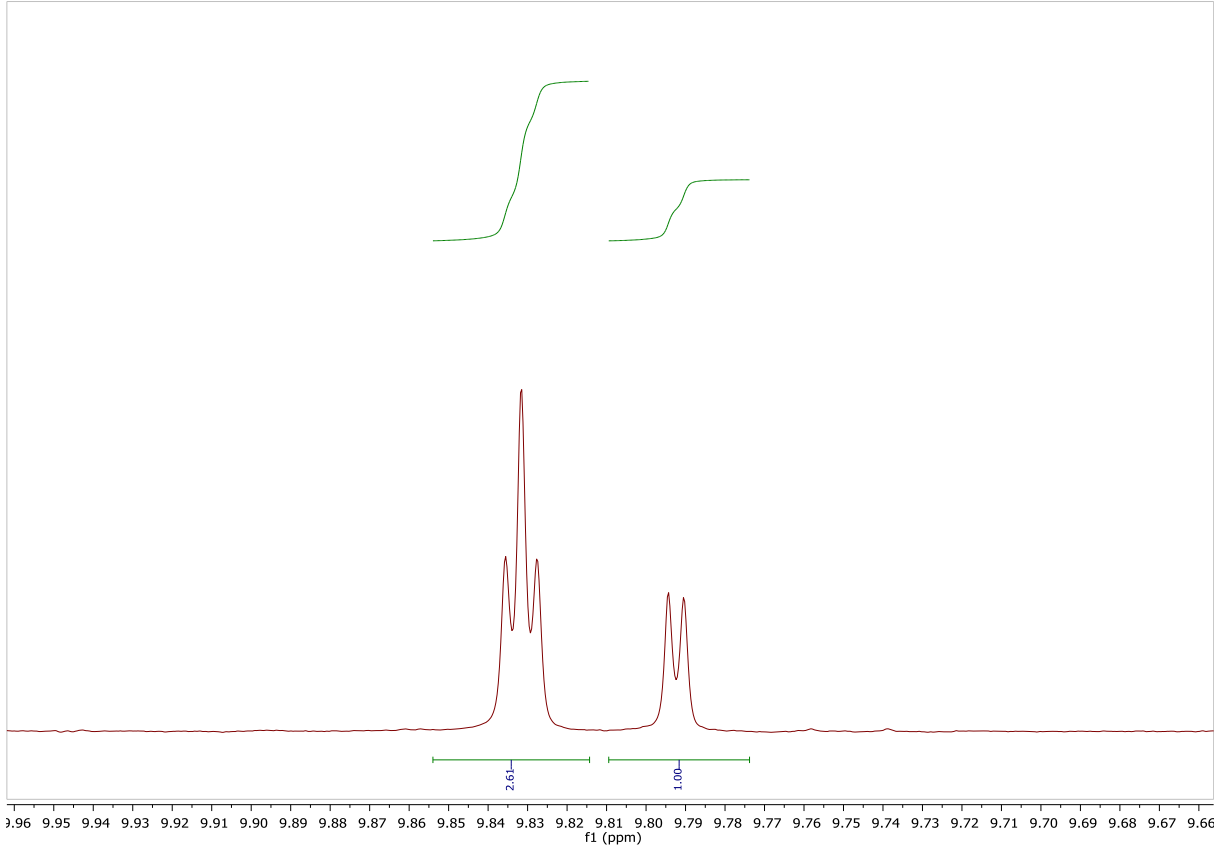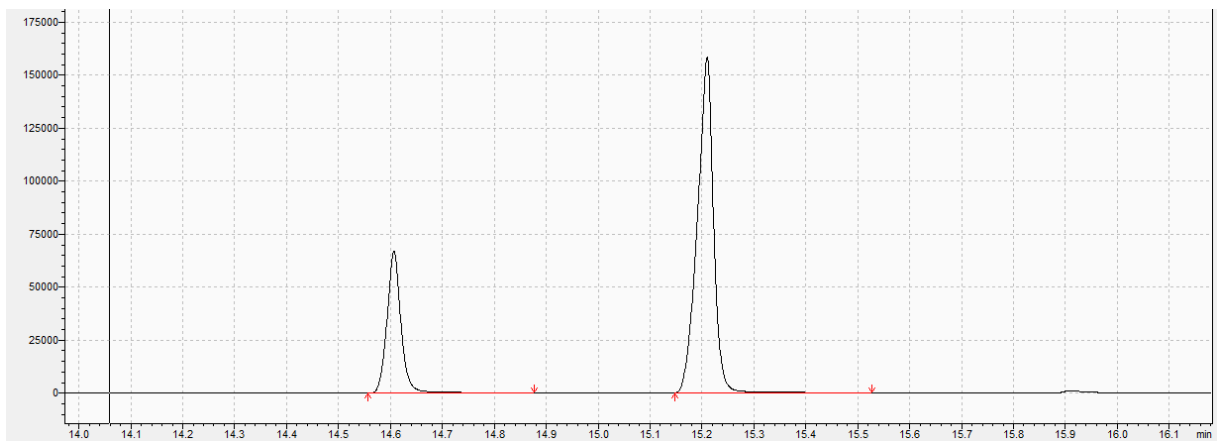

| Retention time | area   |          | l/b ratio |
|----------------|--------|----------|-----------|
| 14.607         | 123895 | Branched | 2.76      |
| 15.210         | 342959 | linear   |           |

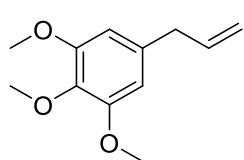

Rh/P<sub>m</sub>Py<sub>3</sub>/ZnTPP  
 0,1 mol%  
 20 bar H<sub>2</sub>:CO  
 48 hrs, 25°C  
 Toluene

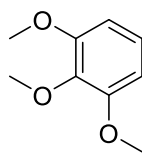

linear

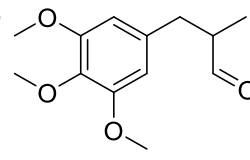

branched

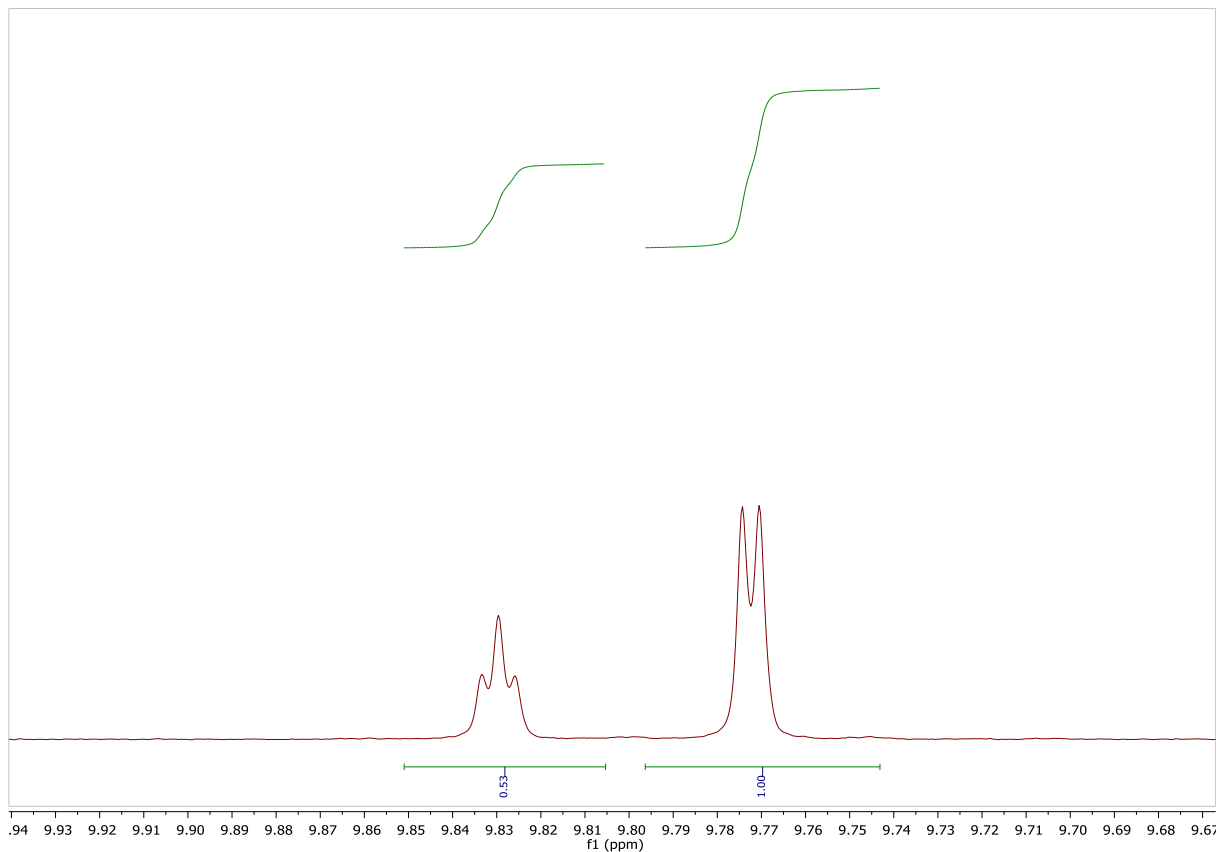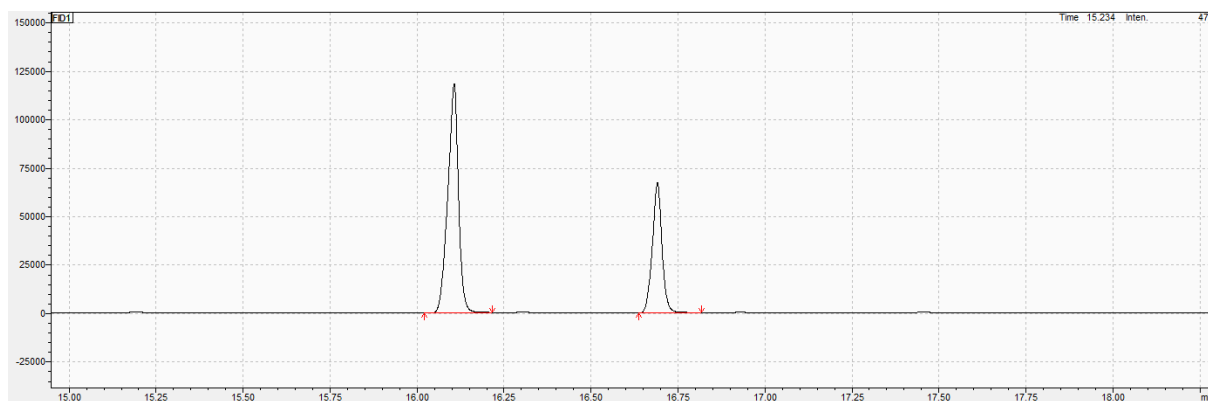

| Retention time | area   |          | I/b ratio |
|----------------|--------|----------|-----------|
| 16.106         | 251444 | Branched | 0.51      |
| 16.691         | 128919 | linear   |           |
|                |        |          |           |

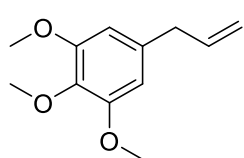

Rh/P<sub>m</sub>Py<sub>3</sub>  
 0,1 mol%  
 20 bar H<sub>2</sub>:CO  
 48 hrs, 25°C  
 Toluene

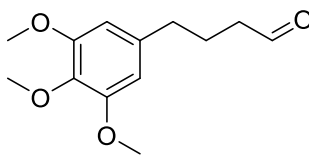

linear

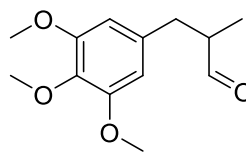

branched

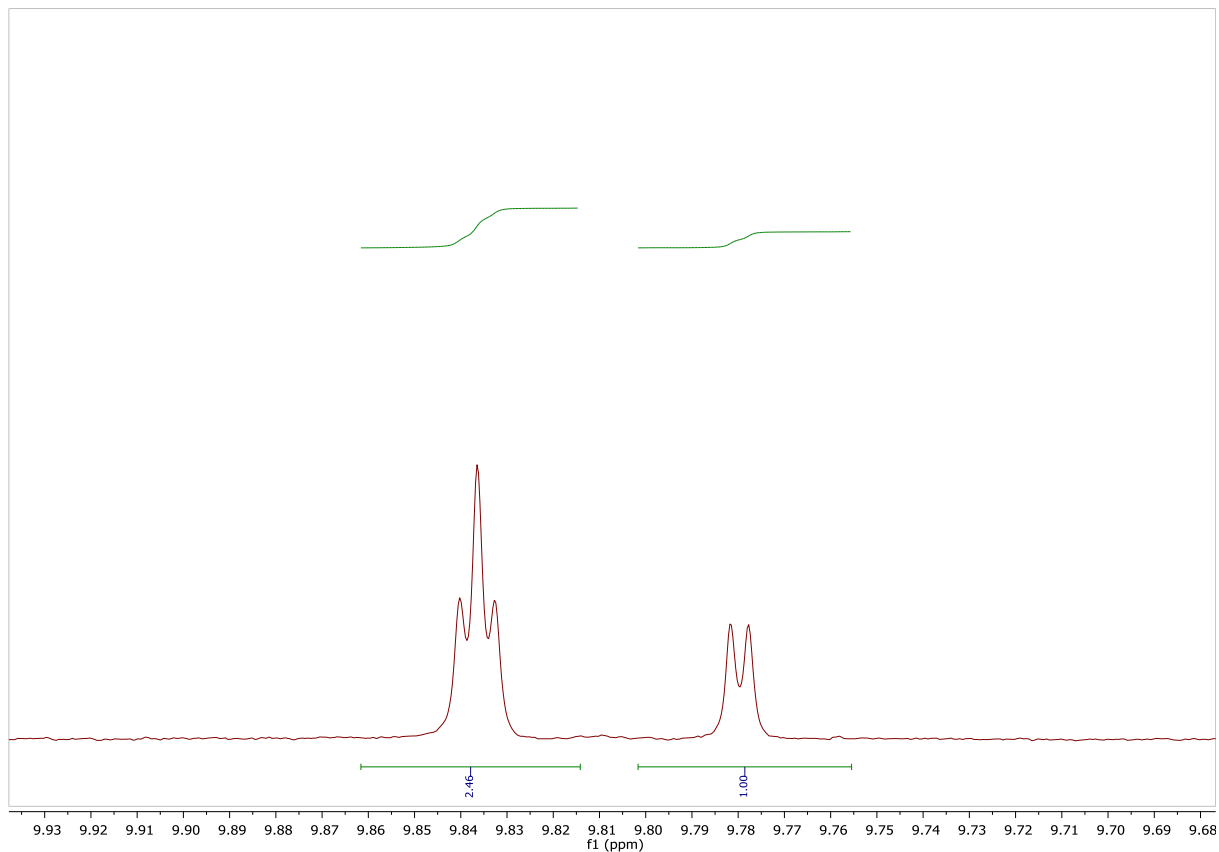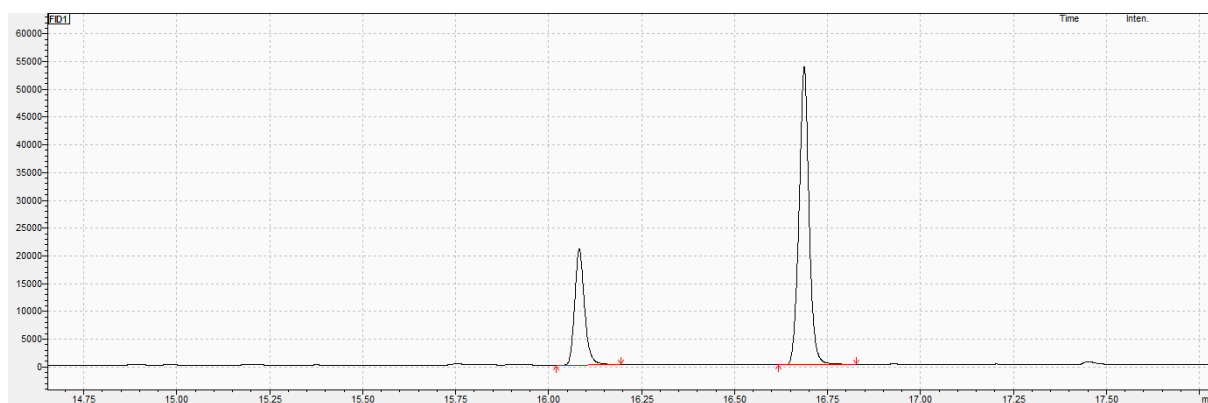

| Retention time | area   |          | I/b ratio |
|----------------|--------|----------|-----------|
| 16.185         | 38125  | Branched | 2.64      |
| 16.687         | 100914 | linear   |           |

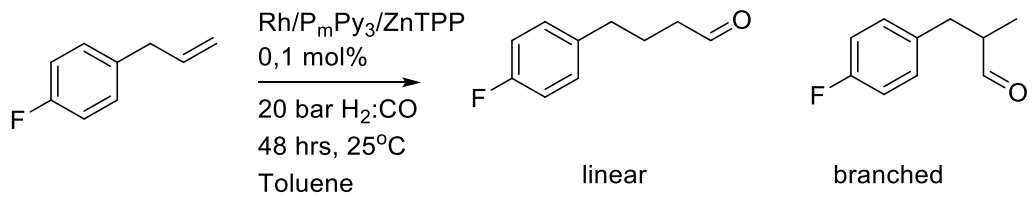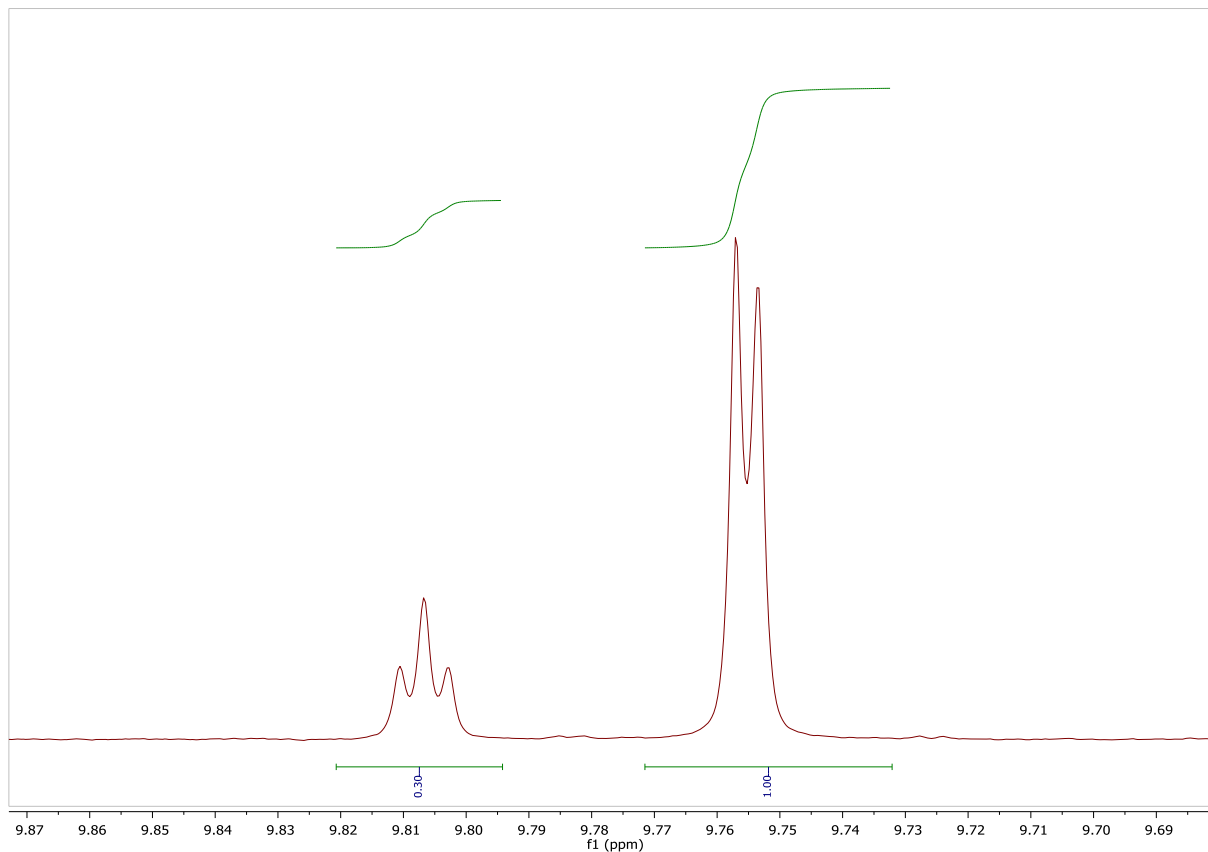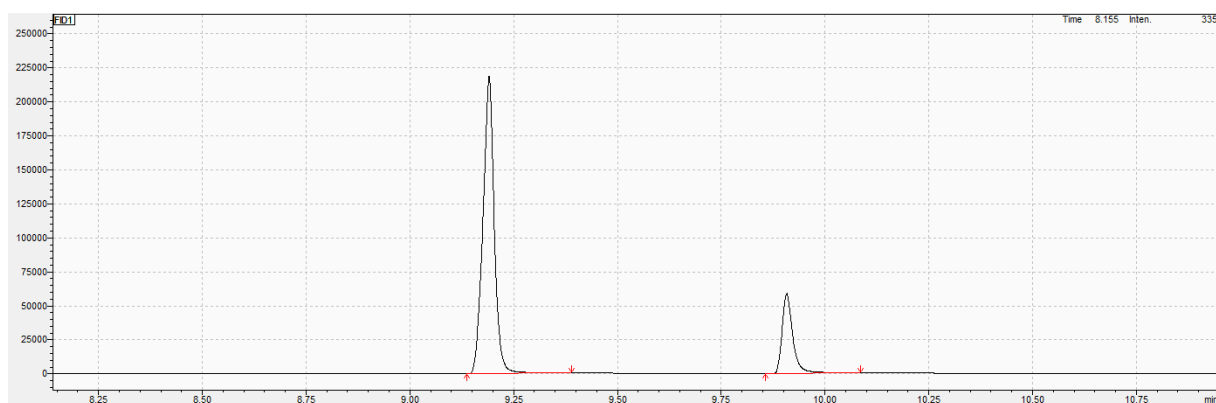

| Retention time | area   |          | l/b ratio |
|----------------|--------|----------|-----------|
| 9.191          | 411500 | Branched | 0.25      |
| 9.908          | 104325 | linear   |           |

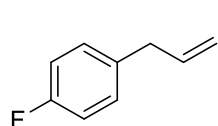

Rh/P<sub>m</sub>Py<sub>3</sub>  
 0,1 mol%  
 20 bar H<sub>2</sub>:CO  
 48 hrs, 25°C  
 Toluene

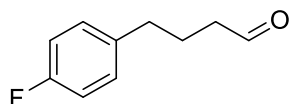

linear

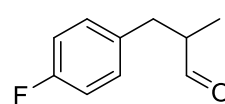

branched

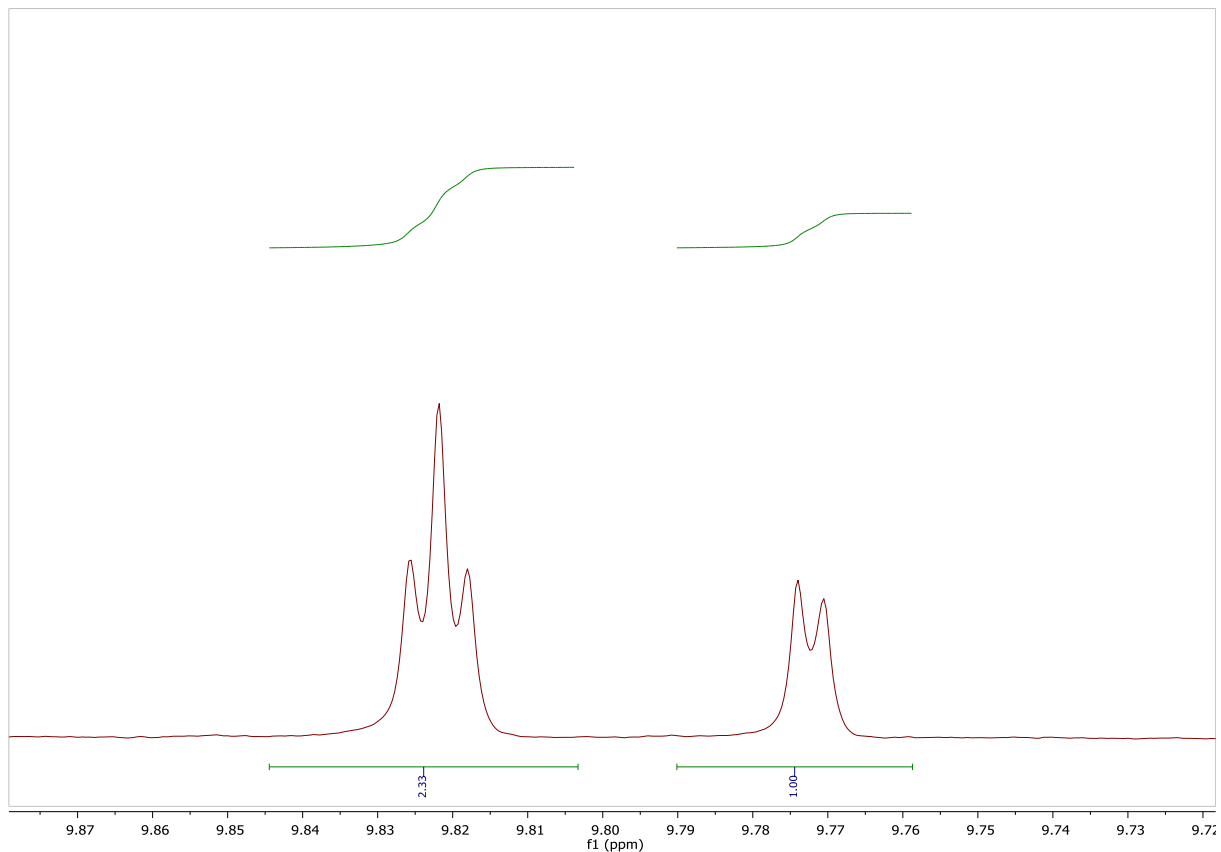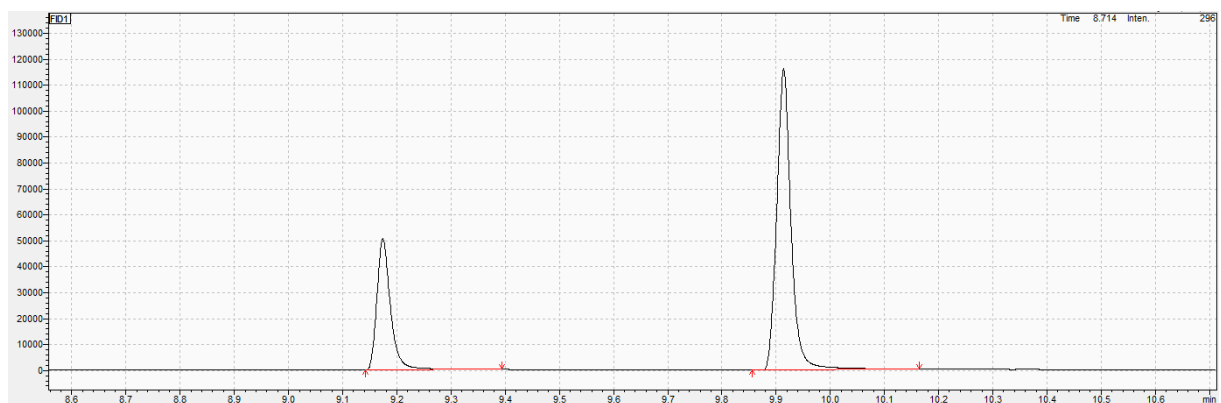

| Retention time | area   |          | l/b ratio |
|----------------|--------|----------|-----------|
| 9.174          | 88218  | Branched | 2.40      |
| 9.914          | 212334 | linear   |           |

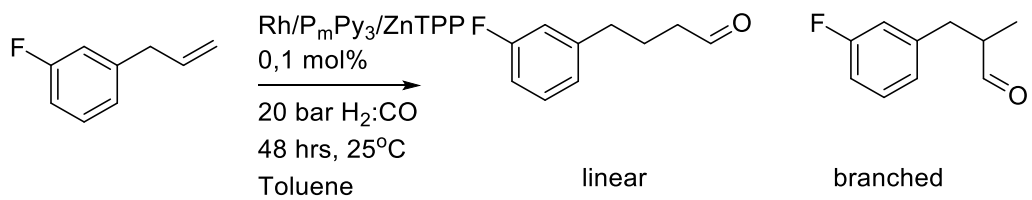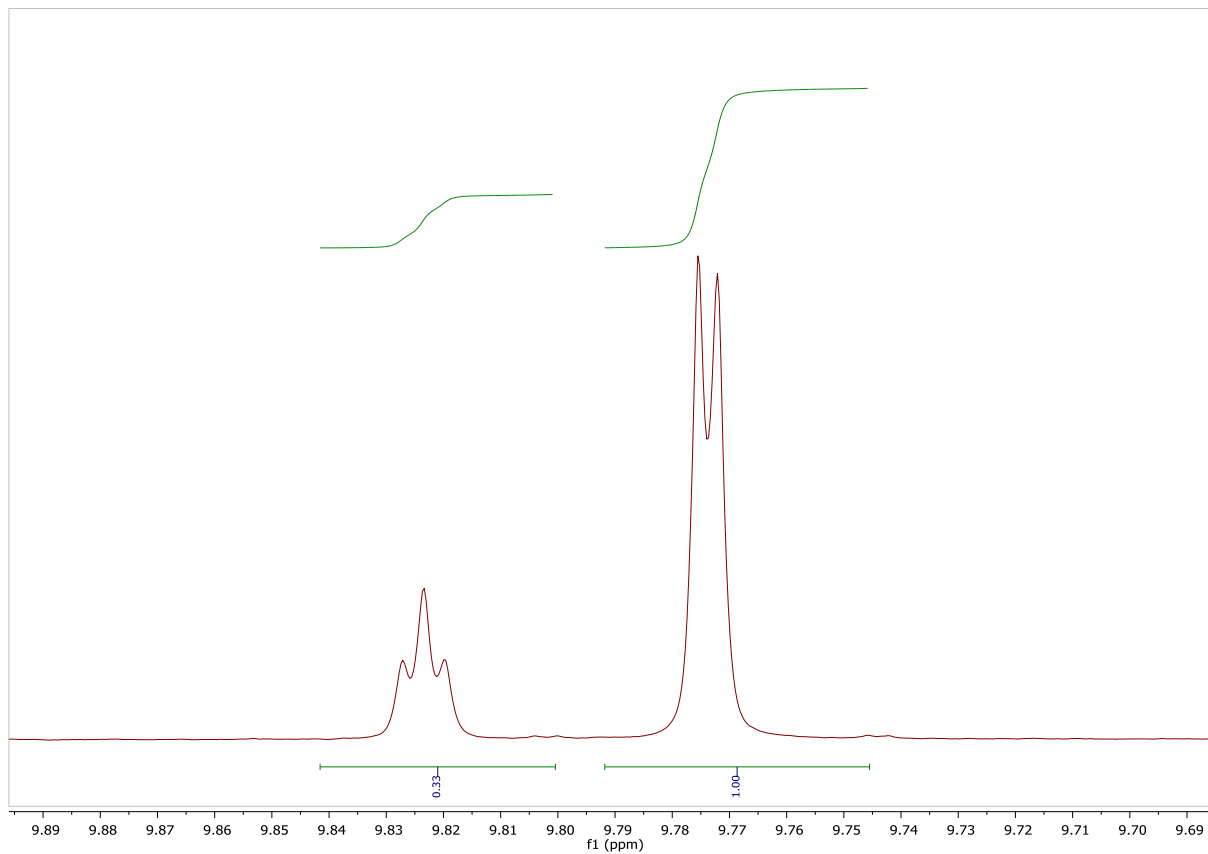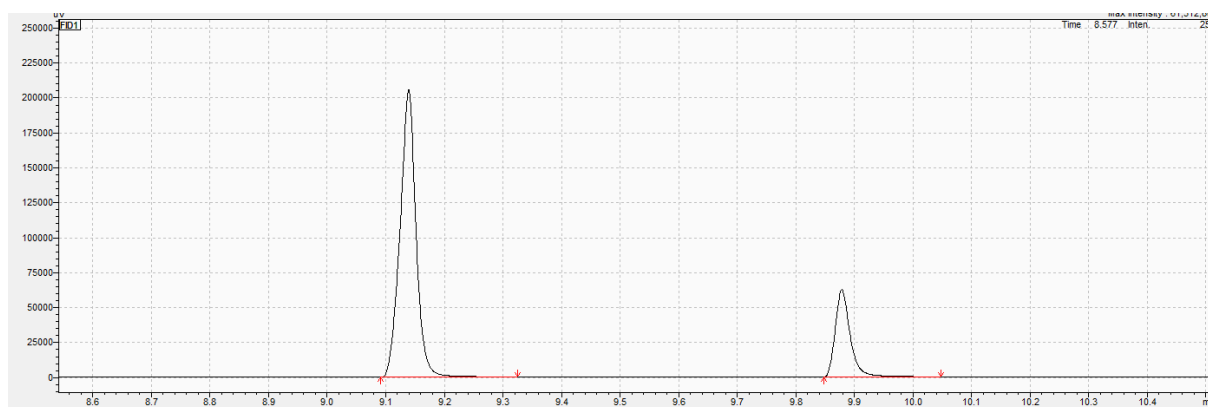

| Retention time | area   |          | l/b ratio |
|----------------|--------|----------|-----------|
| 9.139          | 389583 | Branched | 0.28      |
| 9.879          | 111635 | linear   |           |



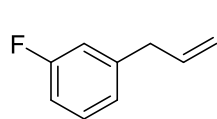

Rh/P<sub>m</sub>Py<sub>3</sub>  
 0,1 mol%  
 20 bar H<sub>2</sub>:CO  
 48 hrs, 25°C  
 Toluene

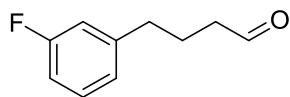

linear

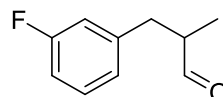

branched

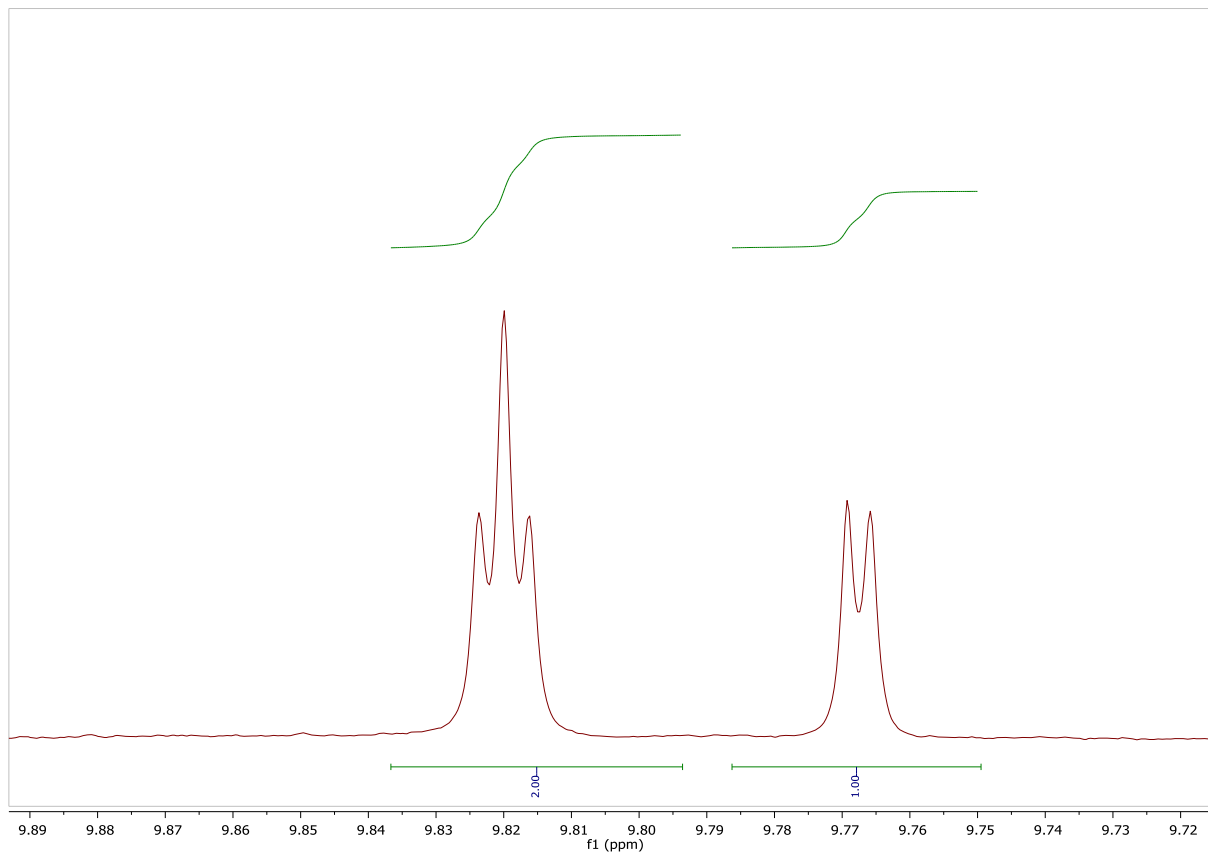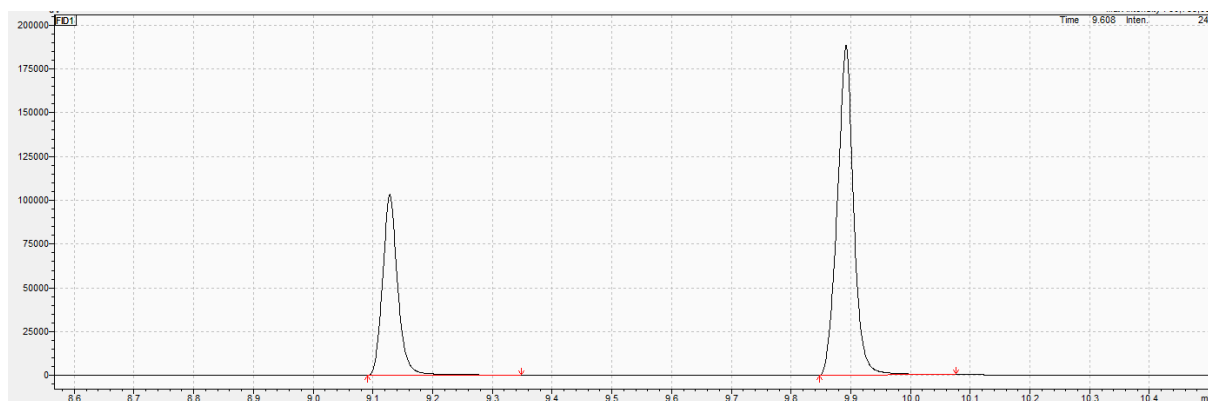

| Retention time | area   |          | l/b ratio |
|----------------|--------|----------|-----------|
| 9.128          | 181077 | Branched | 1.97      |
| 9.892          | 358046 | linear   |           |

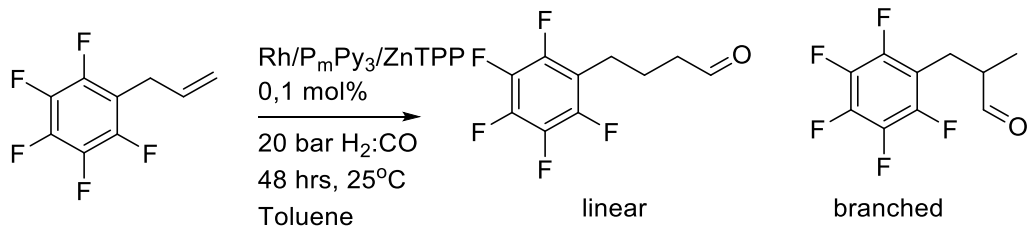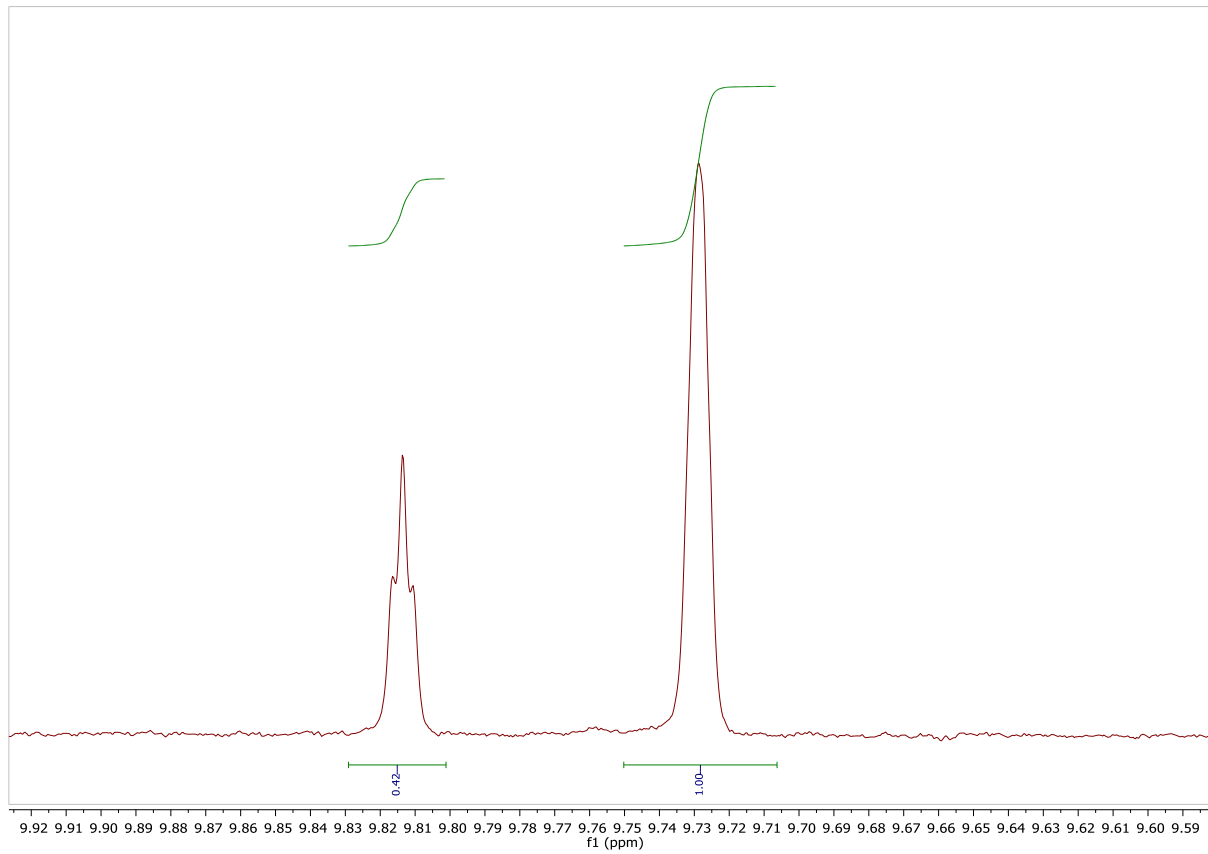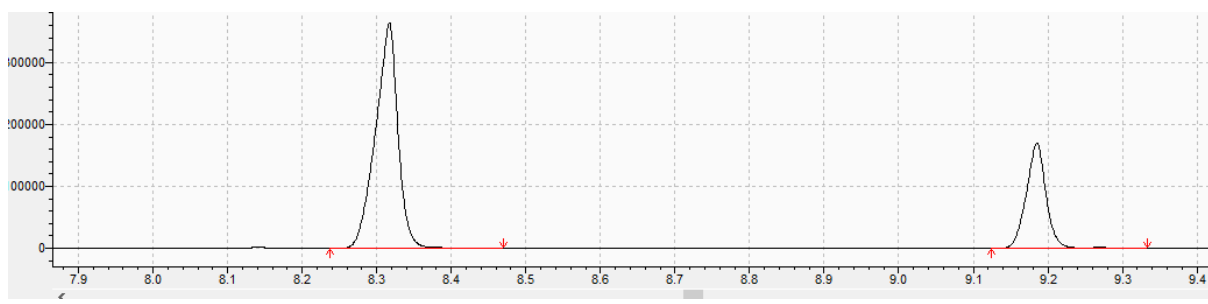

| Time  | Area   |          | I/b ratio |
|-------|--------|----------|-----------|
| 8,317 | 760155 | Branched | 0.41      |
| 9,185 | 310593 | Linear   |           |

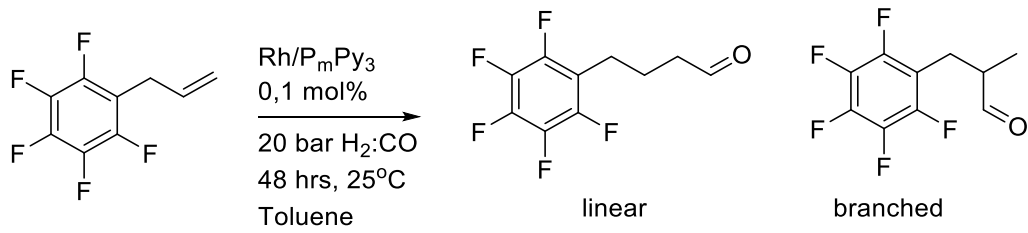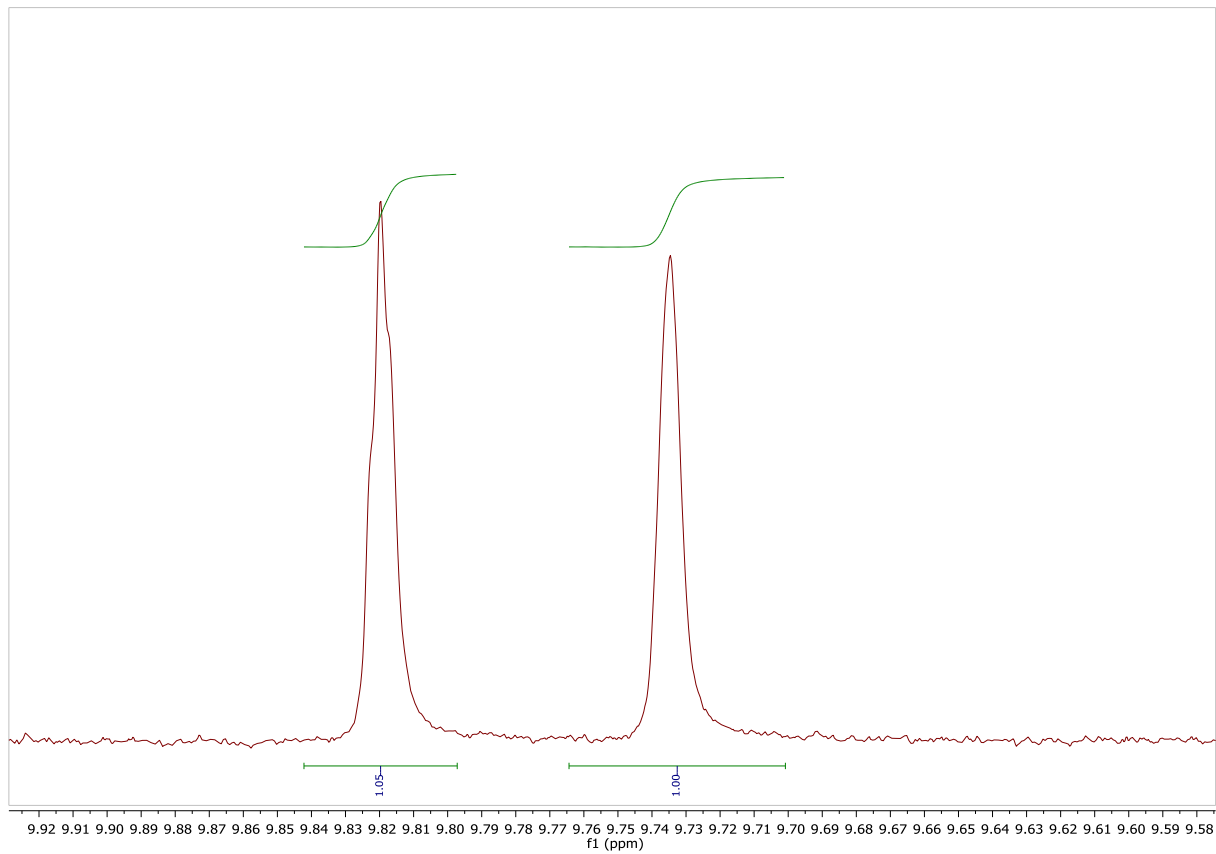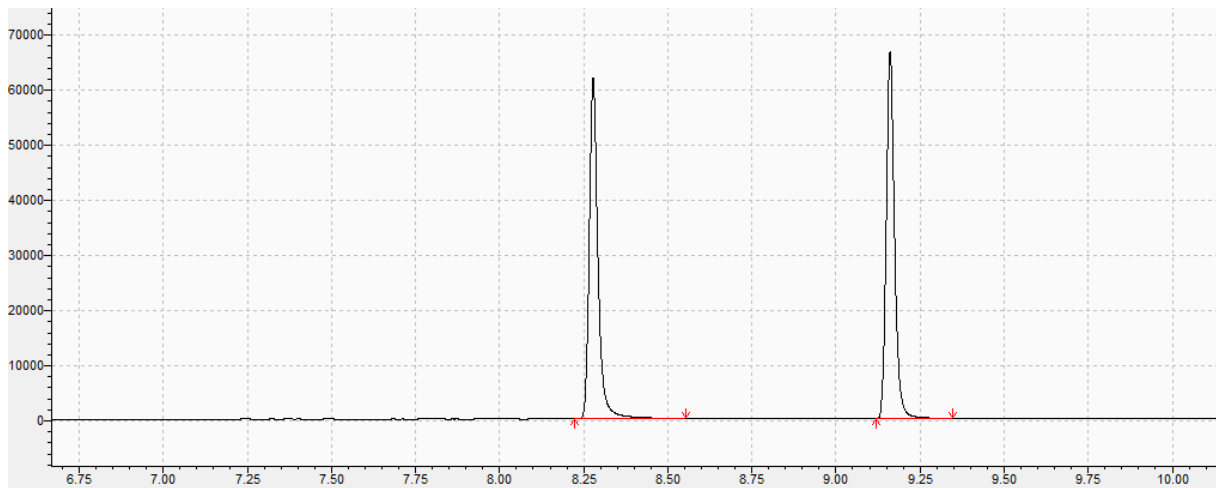

| Retention time | area   |          | l/b ratio |
|----------------|--------|----------|-----------|
| 8,278          | 111900 | Branched | 1,02      |
| 9,161          | 114574 | Linear   |           |

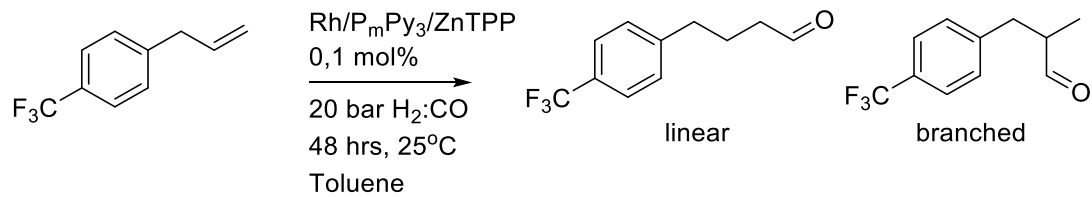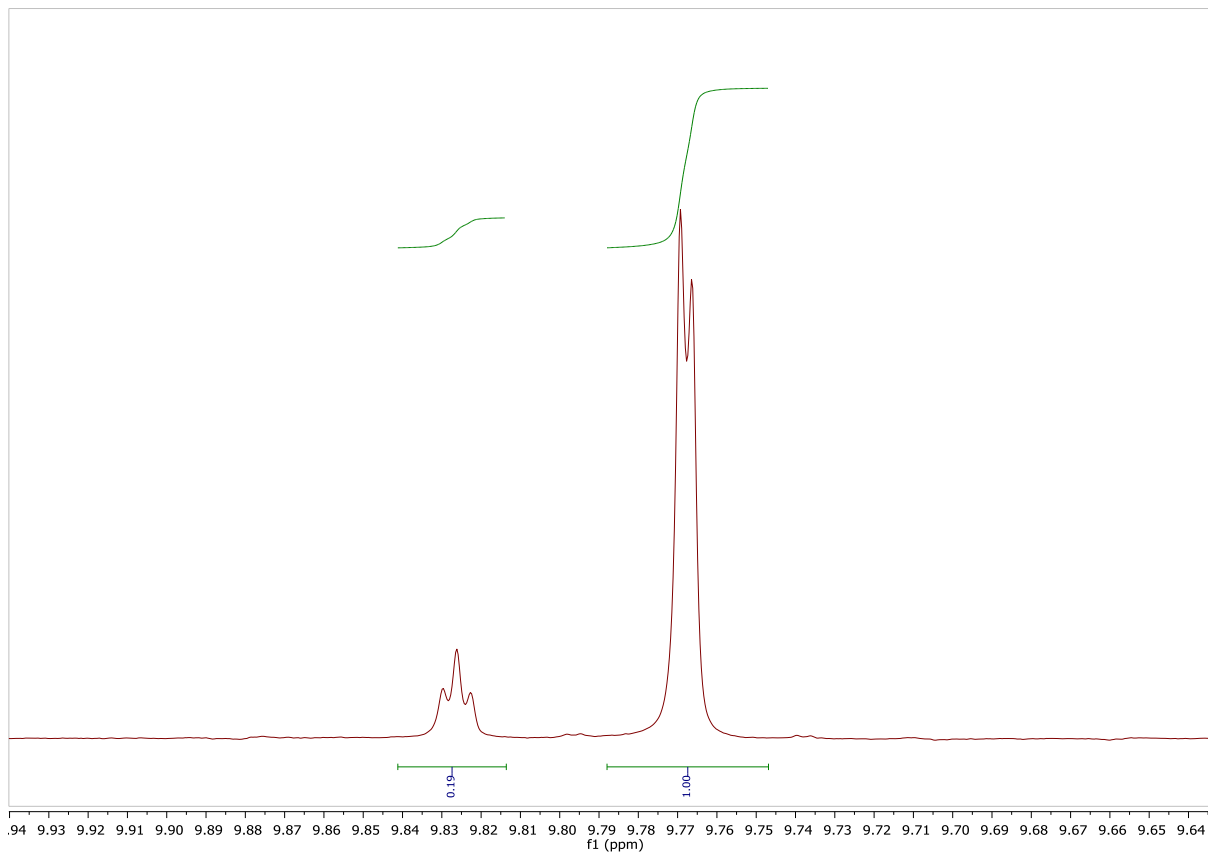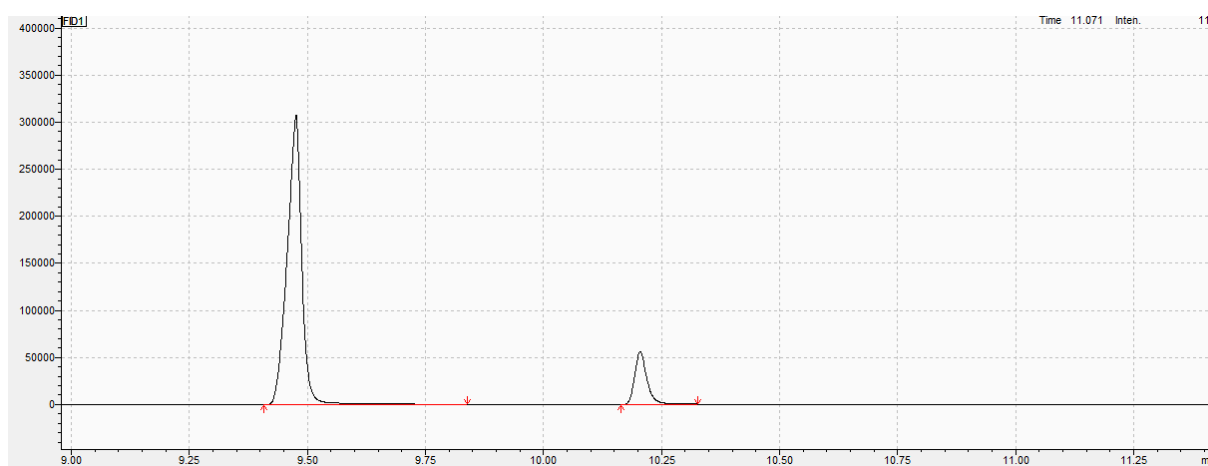

| Retention time | area   |          | I/b ratio |
|----------------|--------|----------|-----------|
| 9.475          | 657809 | Branched | 0.15      |
| 10.205         | 99756  | Linear   |           |

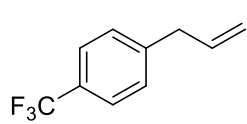

Rh/P<sub>m</sub>Py<sub>3</sub>  
0,1 mol%  
20 bar H<sub>2</sub>:CO  
48 hrs, 25°C  
Toluene

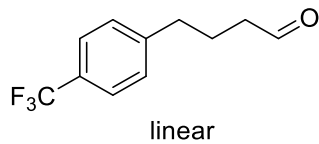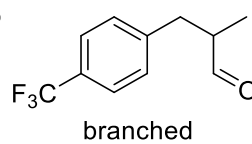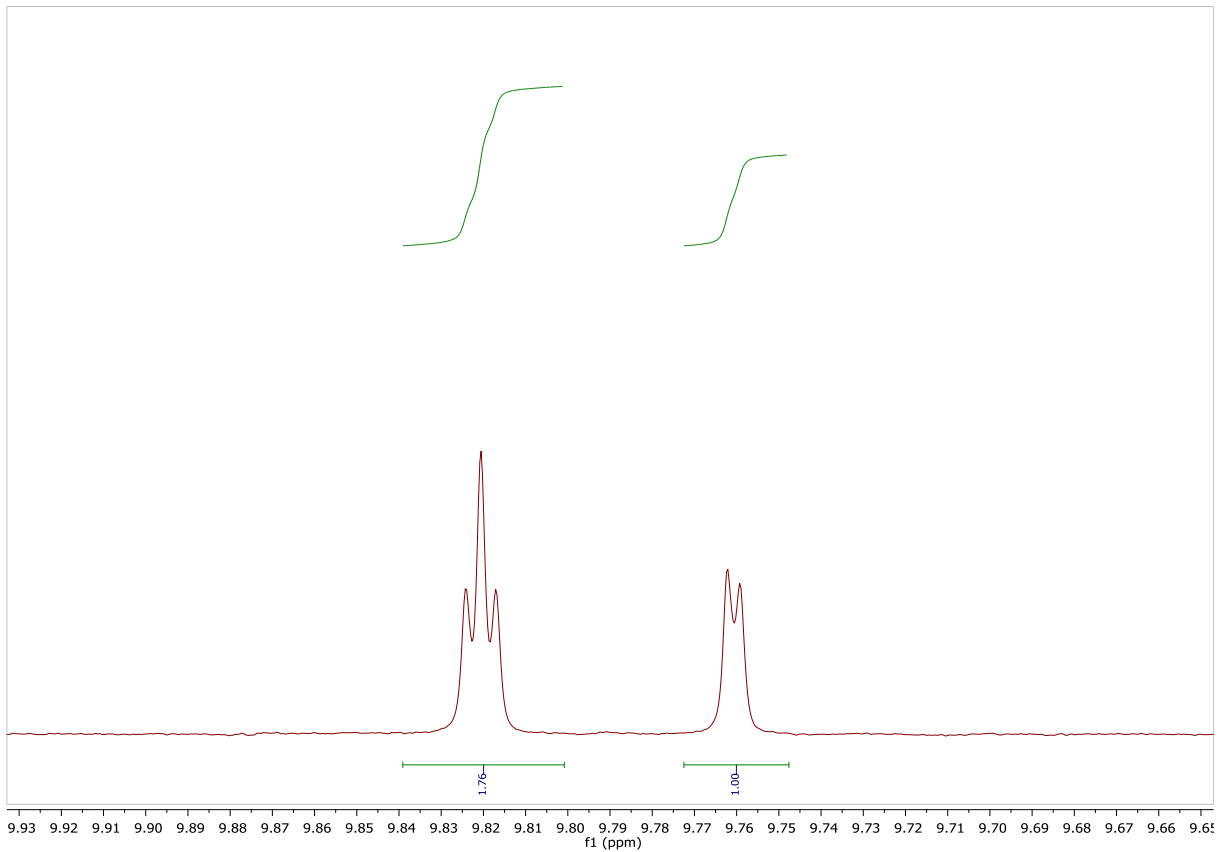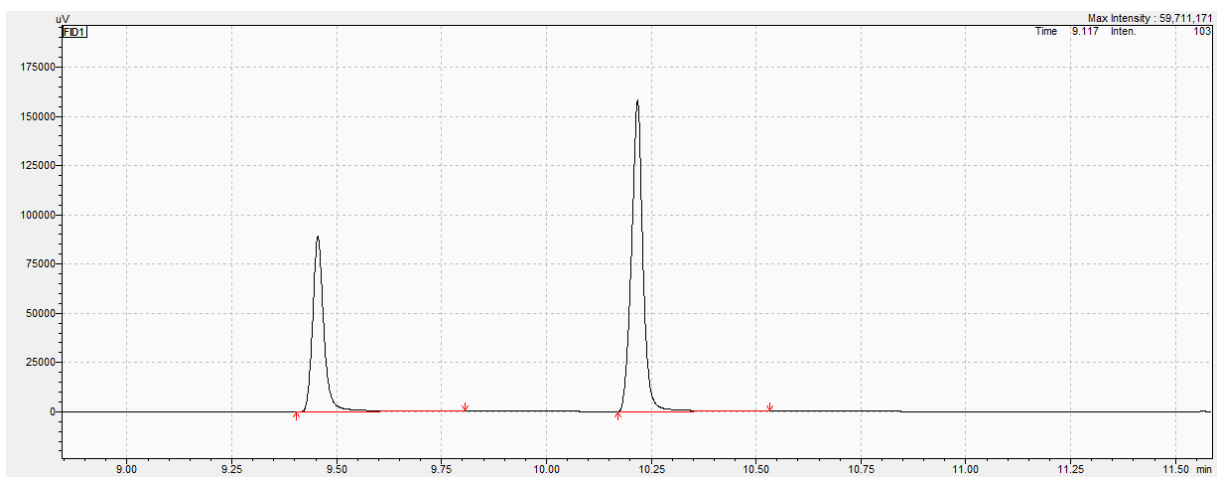

| Retention time | area   |          | l/b ratio |
|----------------|--------|----------|-----------|
| 9.455          | 164989 | Branched | 1.82      |
| 10.217         | 300997 | Linear   |           |

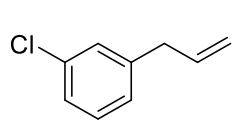

Rh/P<sub>m</sub>Py<sub>3</sub>/ZnTPP  
 0,1 mol%  
 20 bar H<sub>2</sub>:CO  
 48 hrs, 25°C  
 Toluene

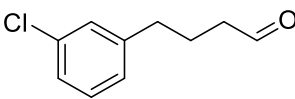

linear

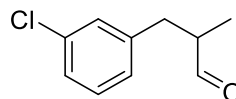

branched

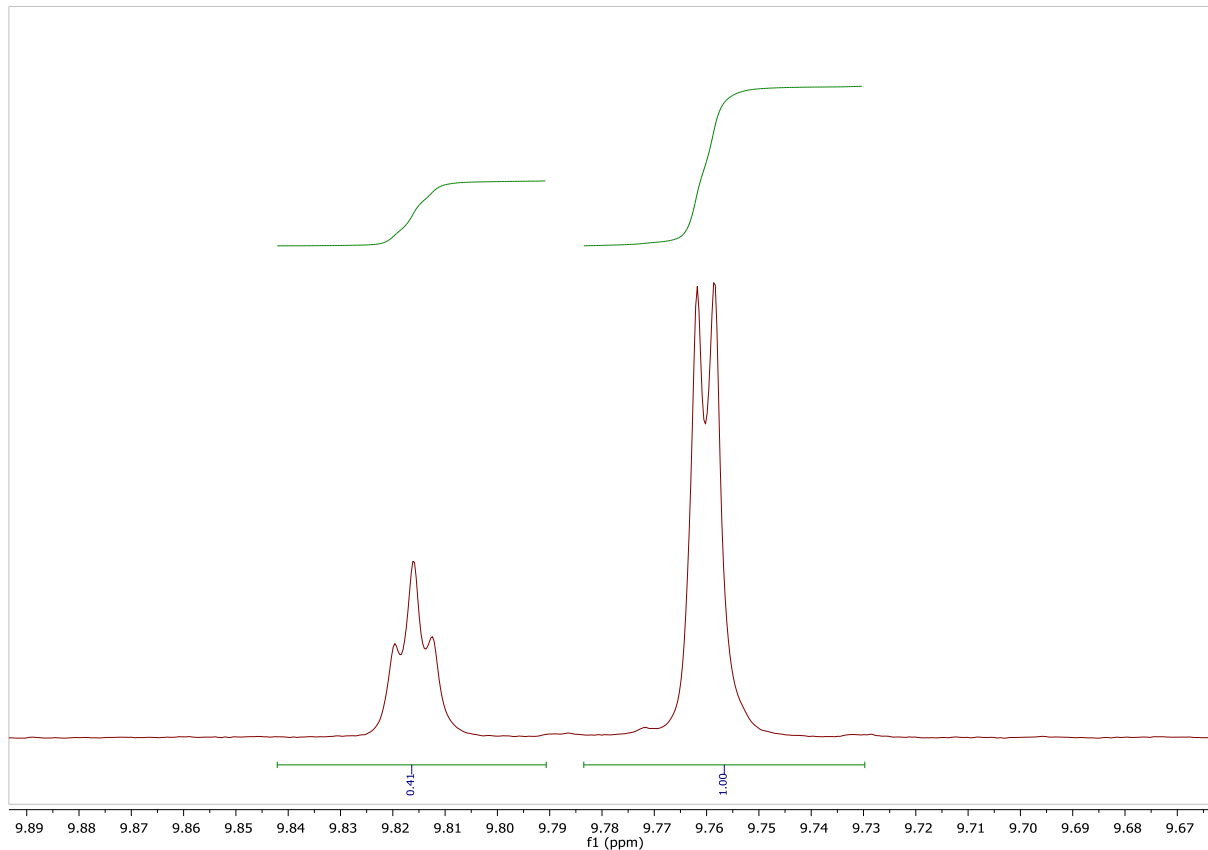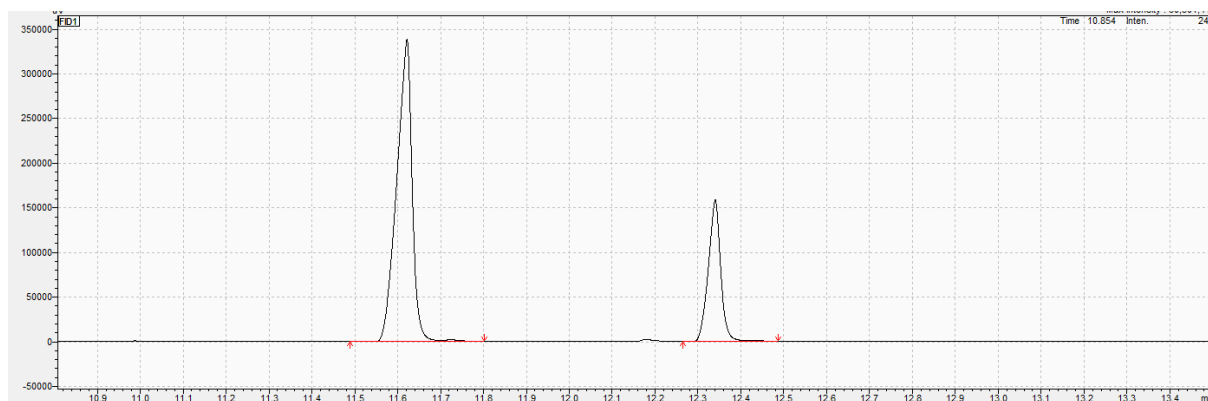

| Retention time | area   |          | l/b ratio |
|----------------|--------|----------|-----------|
| 11.621         | 837114 | Branched | 0.37      |
| 12.340         | 313939 | Linear   |           |

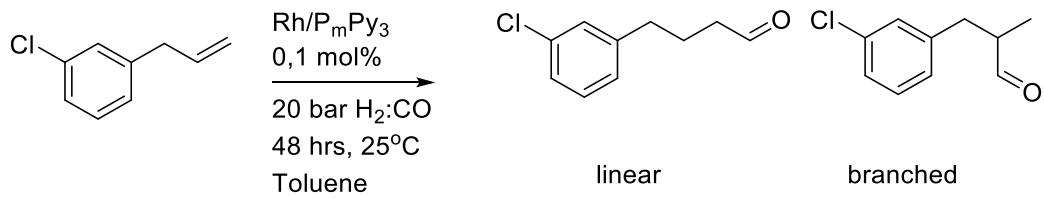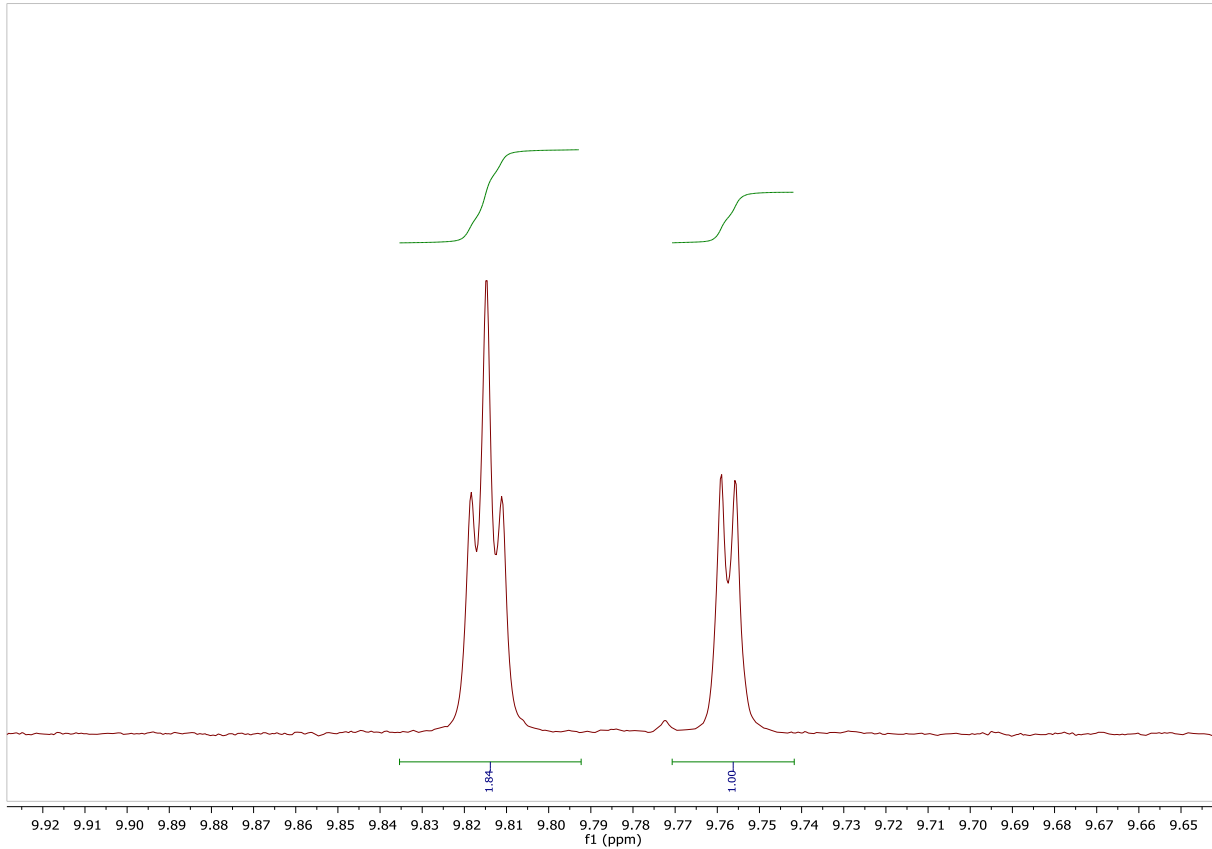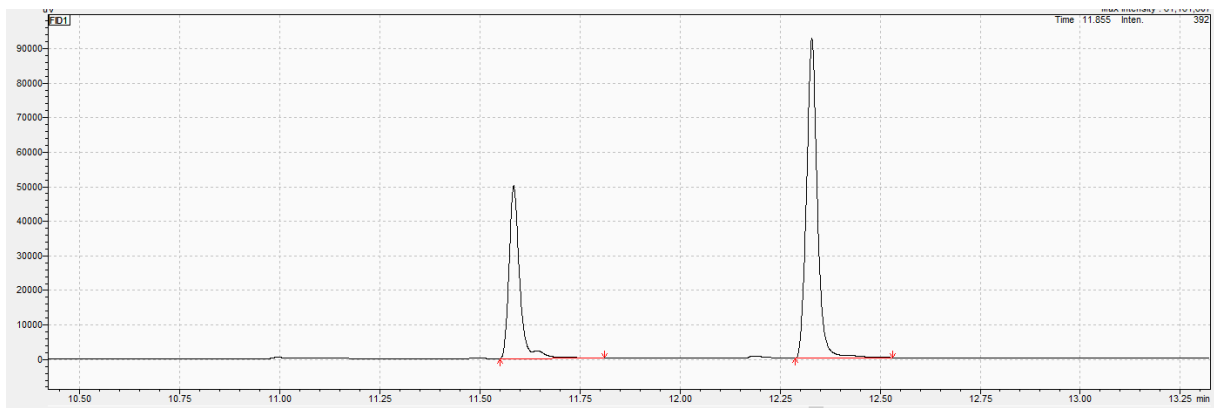

| Retention time | area   |          | l/b ratio |
|----------------|--------|----------|-----------|
| 11.584         | 92942  | Branched | 1.88      |
| 12.329         | 175077 | Linear   |           |

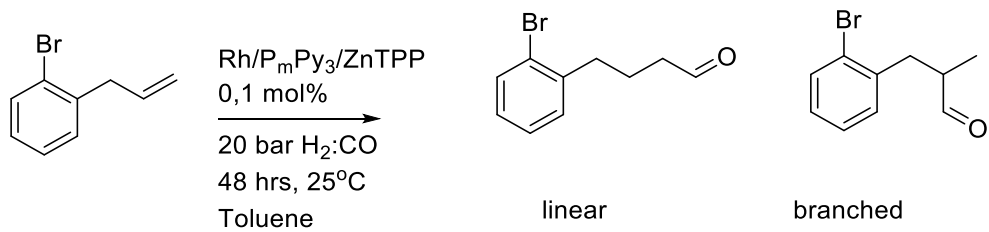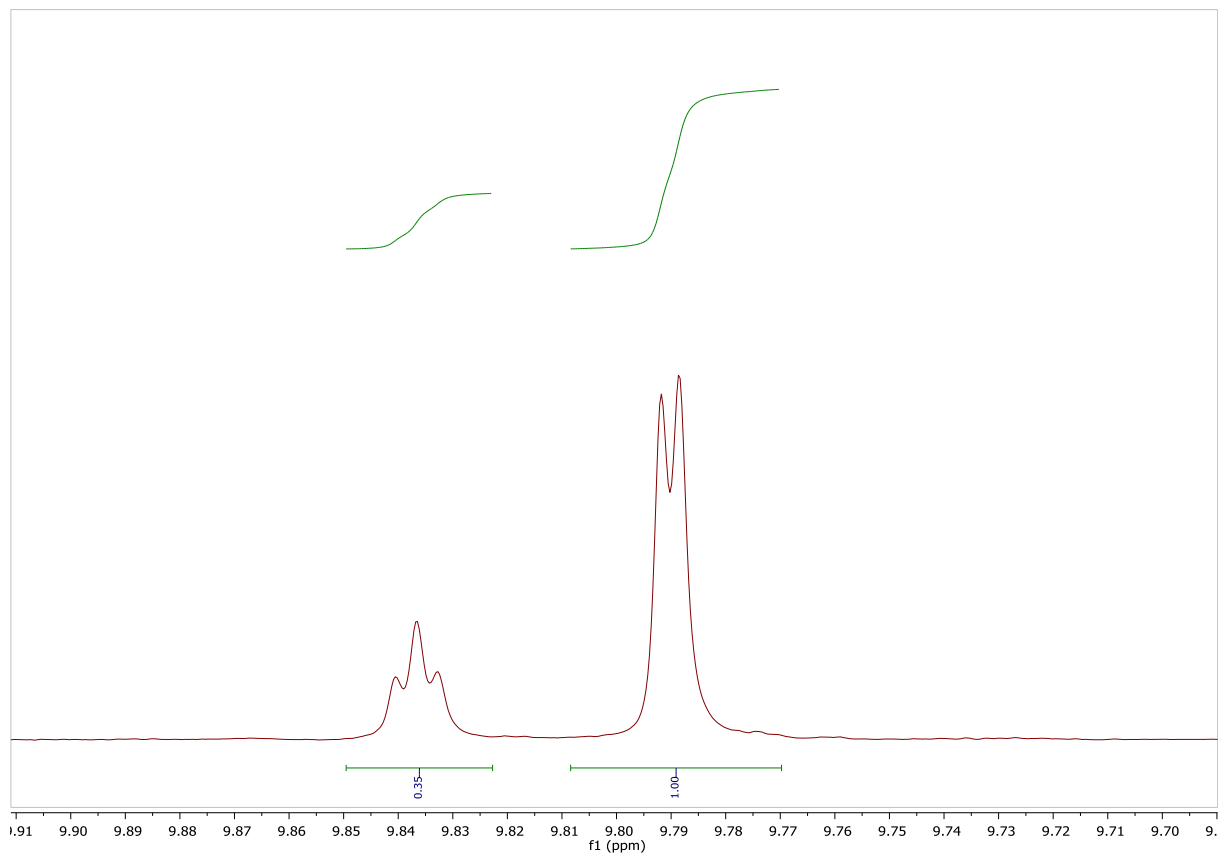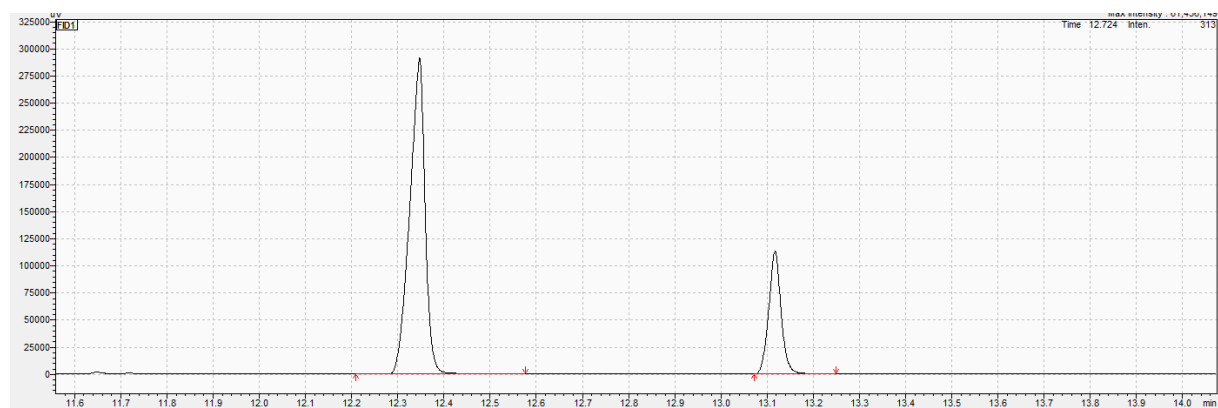

| Retention time | area   |          | l/b ratio |
|----------------|--------|----------|-----------|
| 12.522         | 669865 | Branched | 0.31      |
| 13.117         | 210584 | Linear   |           |



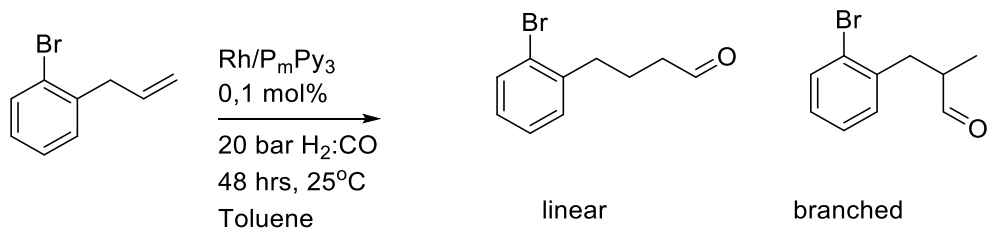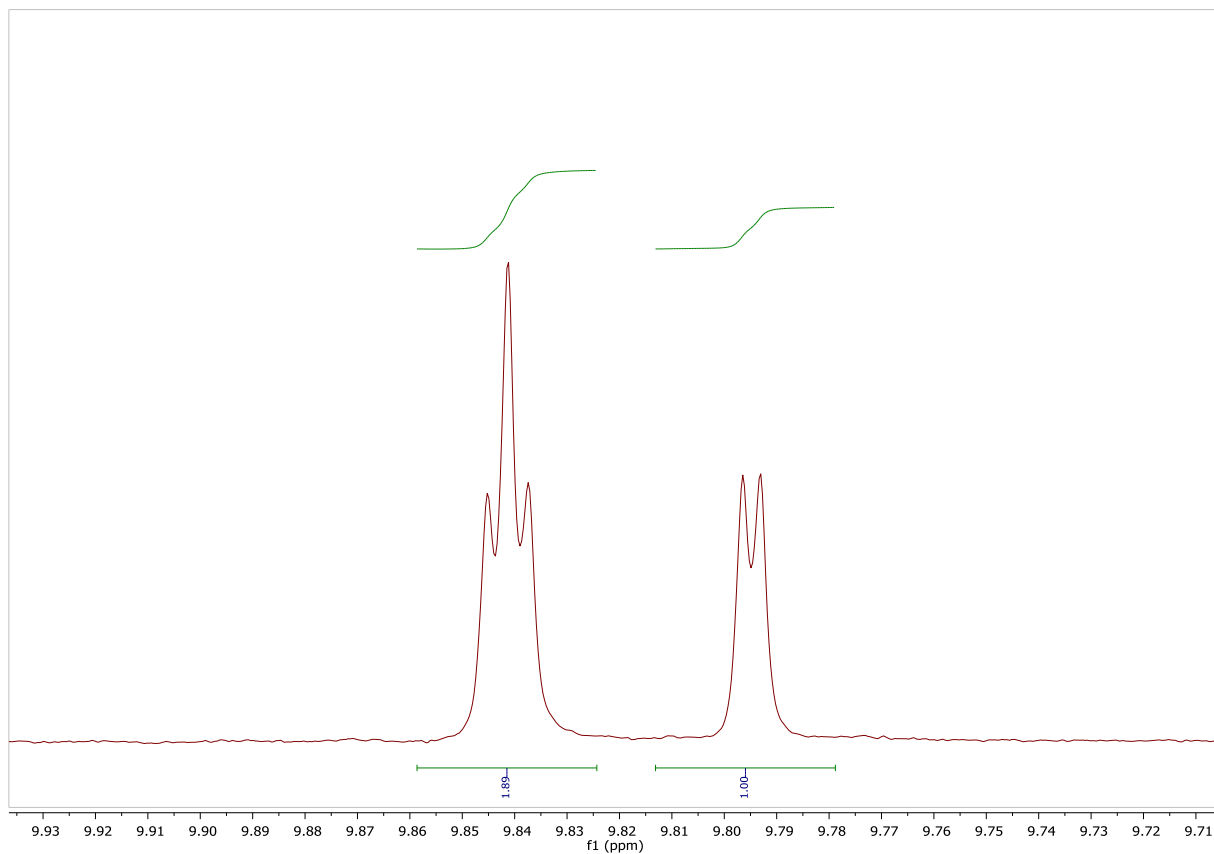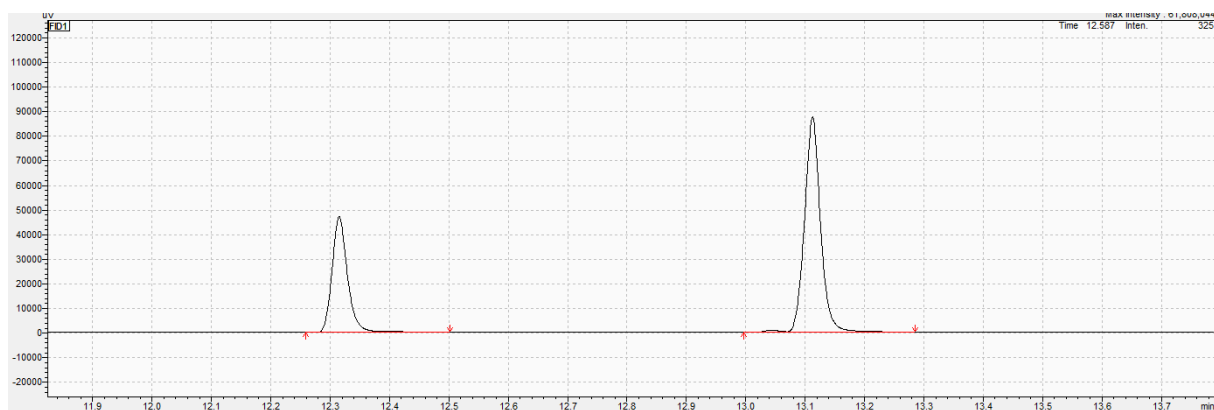

| Retention time | area   |          | l/b ratio |
|----------------|--------|----------|-----------|
| 12.315         | 85273  | Branched | 1.93      |
| 13.113         | 164803 | Linear   |           |

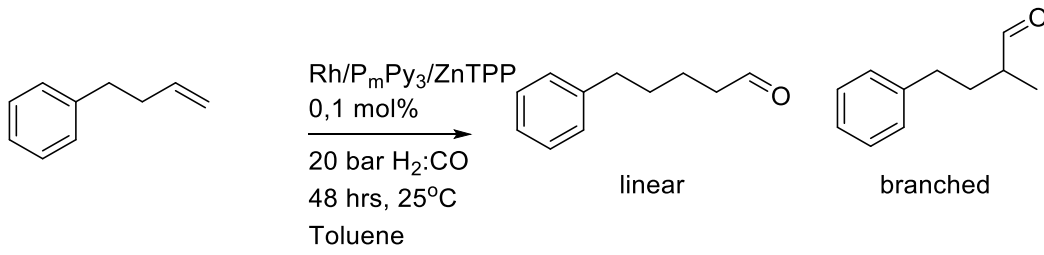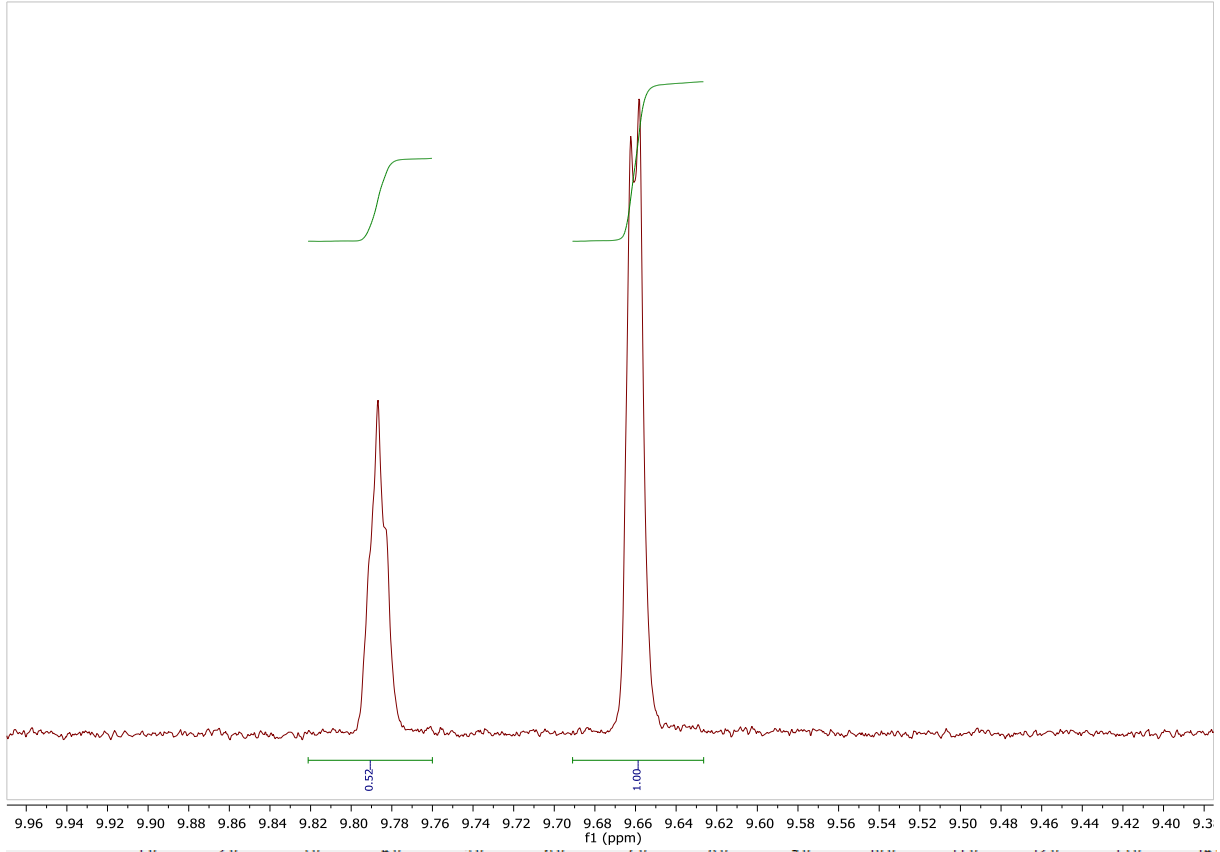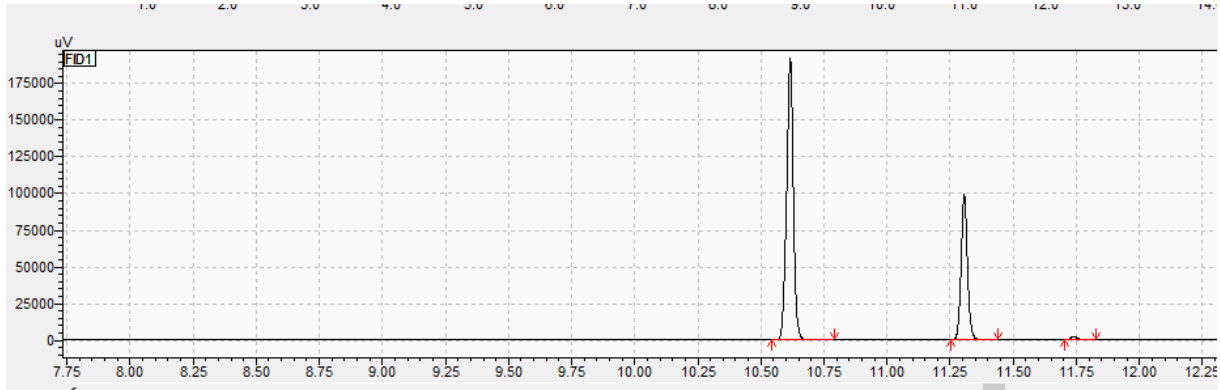

| Retention time | area   |          | l/b ratio |
|----------------|--------|----------|-----------|
| 10,616         | 353443 | Branched | 0.49      |
| 11,306         | 172529 | Linear   |           |

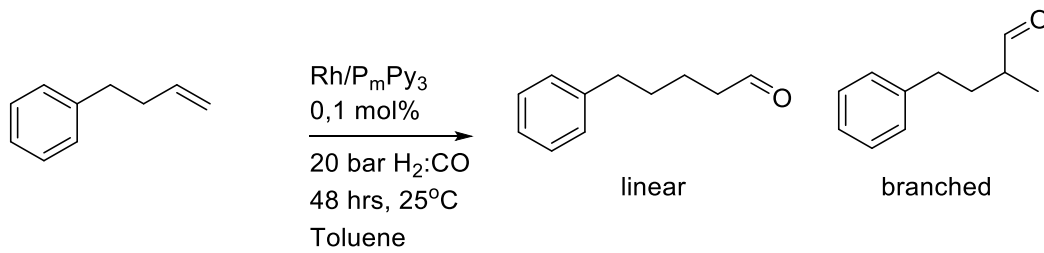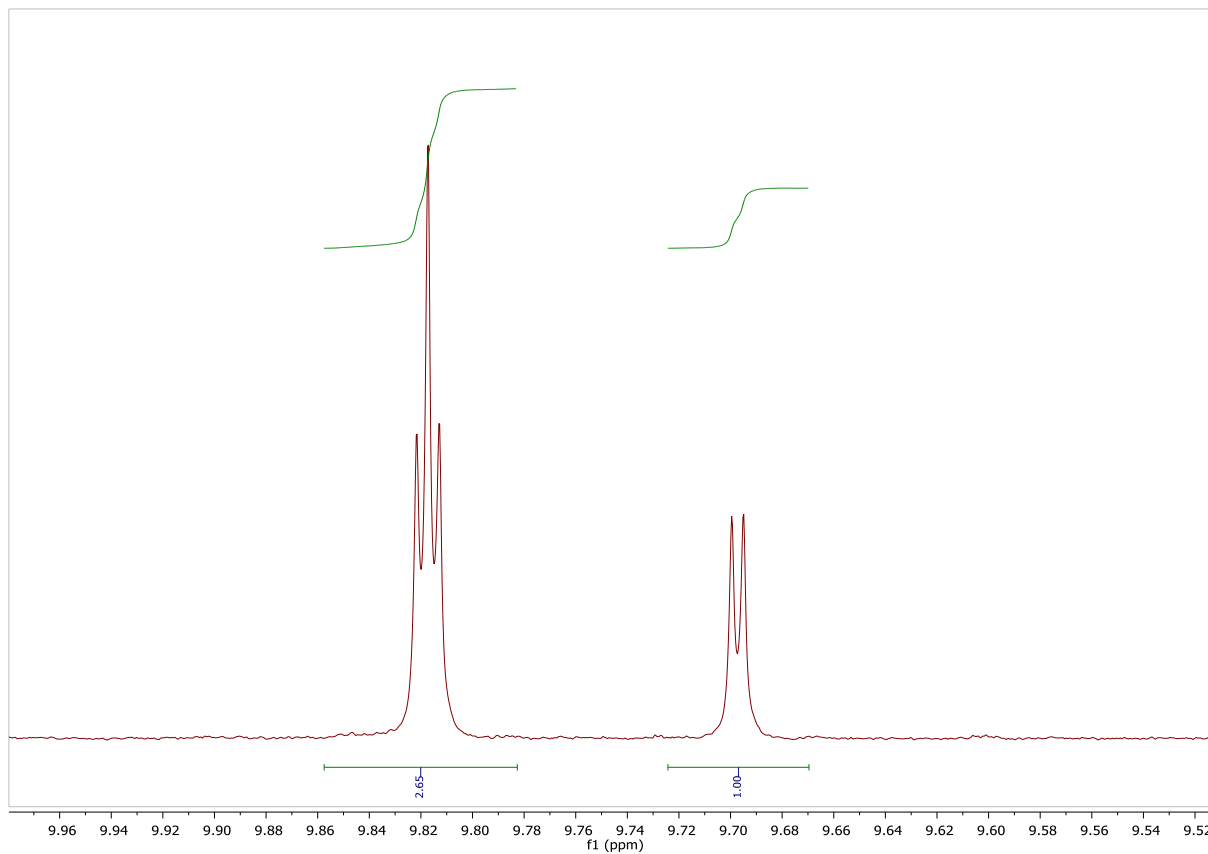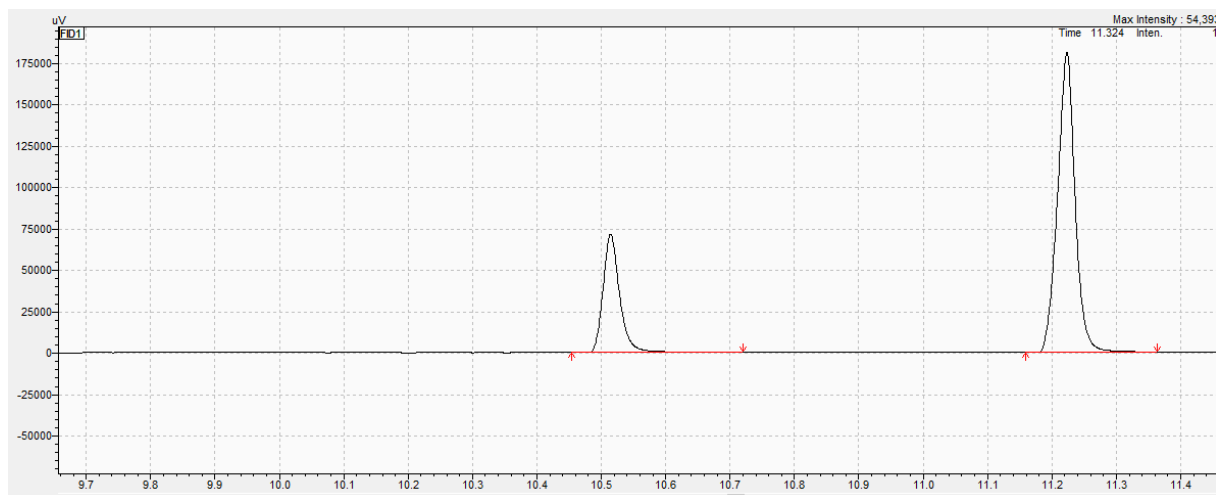

| Retention time | area   |          | l/b ratio |
|----------------|--------|----------|-----------|
| 10.514         | 128428 | Branhced | 2.67      |
| 11.223         | 343725 | linear   |           |

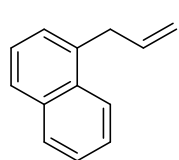

Rh/P<sub>m</sub>Py<sub>3</sub>/ZnTPP  
 0,1 mol%  
 20 bar H<sub>2</sub>:CO  
 48 hrs, 25°C  
 Toluene

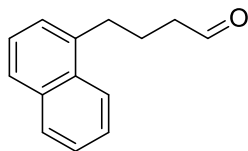

linear

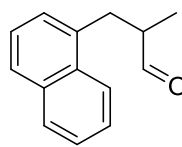

branched

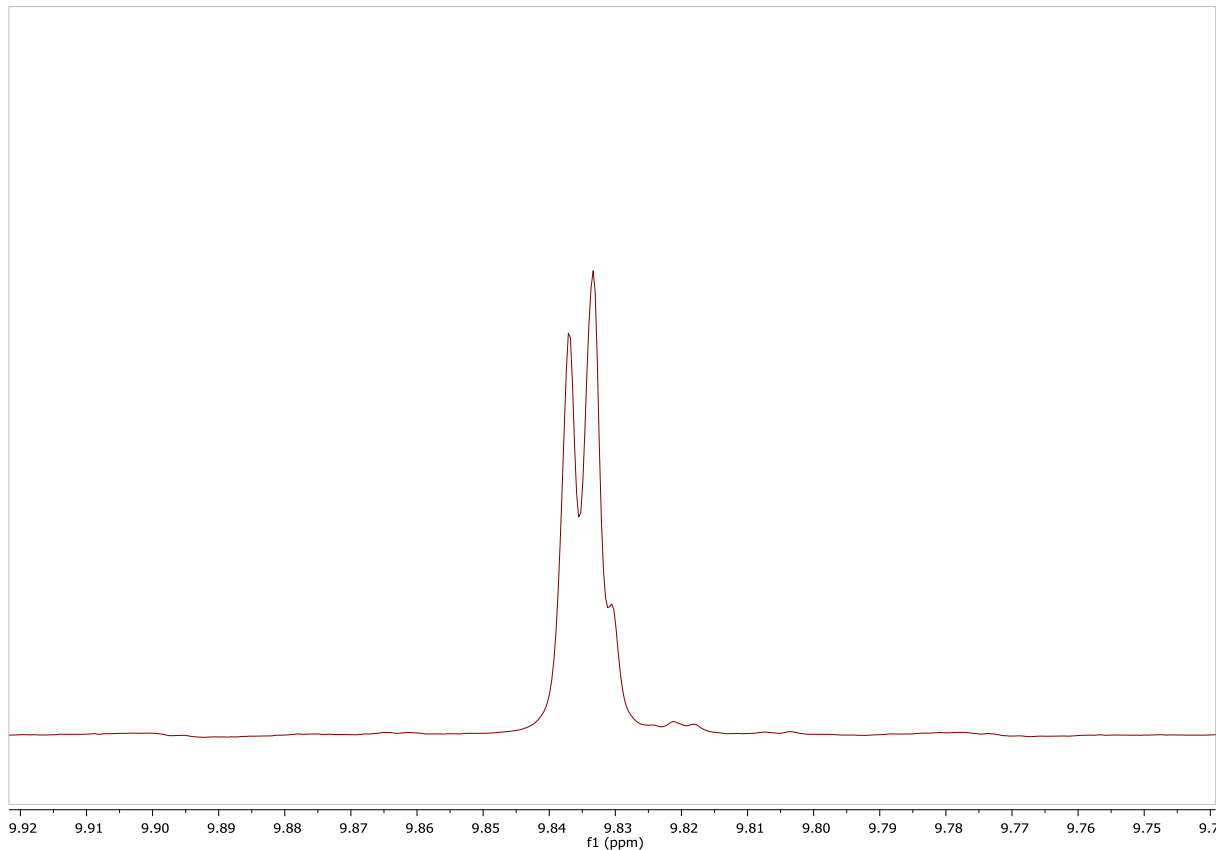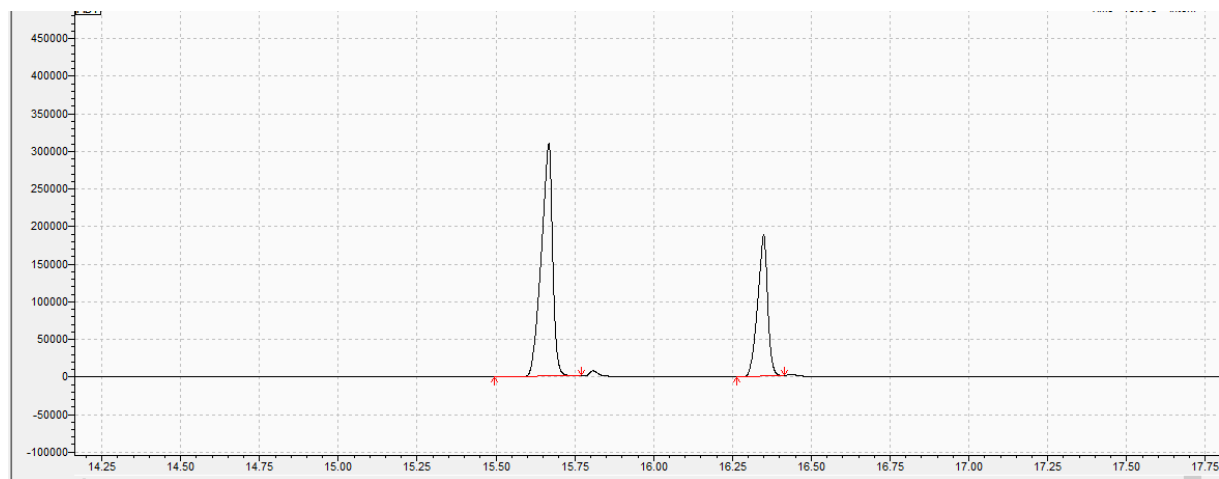

| Retention time | Area   |          | l/b ratio |
|----------------|--------|----------|-----------|
| 15.667         | 768927 | Branched | 0.53      |
| 16.349         | 410501 | Linear   |           |



Rh/P<sub>m</sub>Py<sub>3</sub>  
 0,1 mol%  
 20 bar H<sub>2</sub>:CO  
 48 hrs, 25°C  
 Toluene



linear

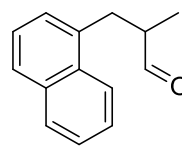

branched

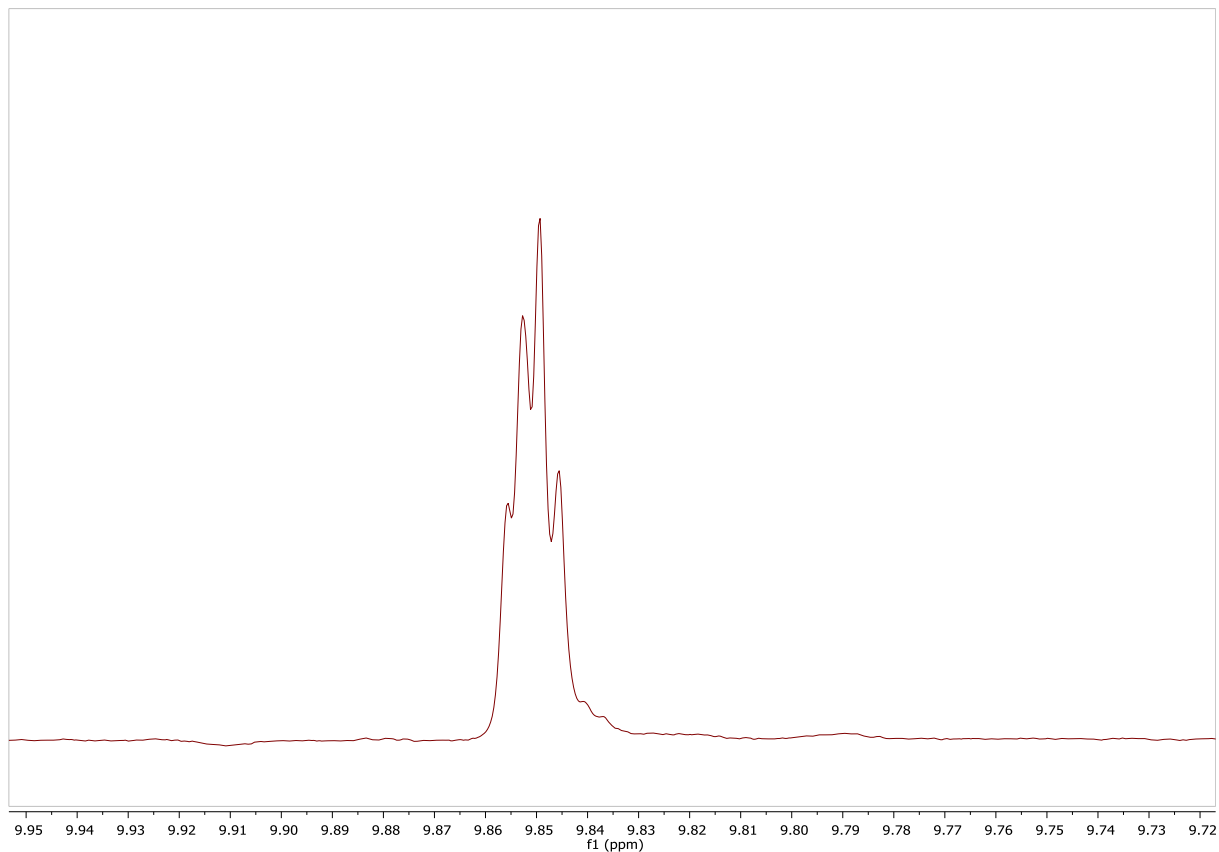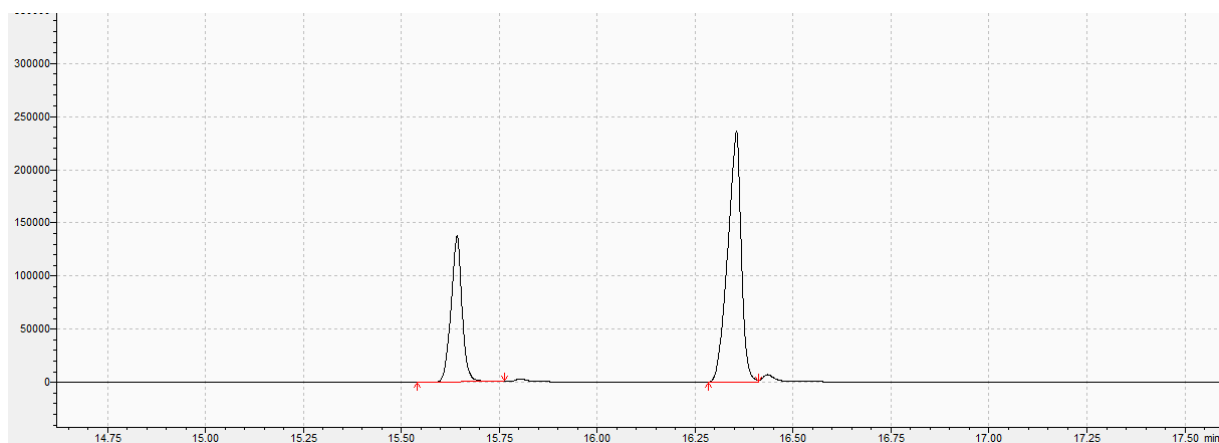

| Retention time | Area   |          | I/b ratio |
|----------------|--------|----------|-----------|
| 15.642         | 266118 | Branched | 2.11      |
| 16.355         | 562816 | Linear   |           |

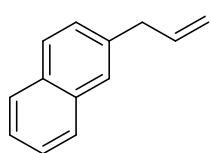

Rh/P<sub>m</sub>Py<sub>3</sub>/ZnTPP  
 0,1 mol%  
 20 bar H<sub>2</sub>:CO  
 48 hrs, 25°C  
 Toluene

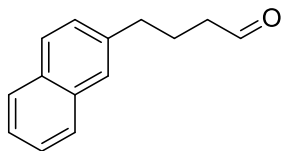

linear

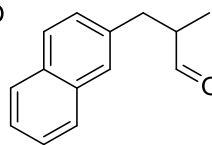

branched

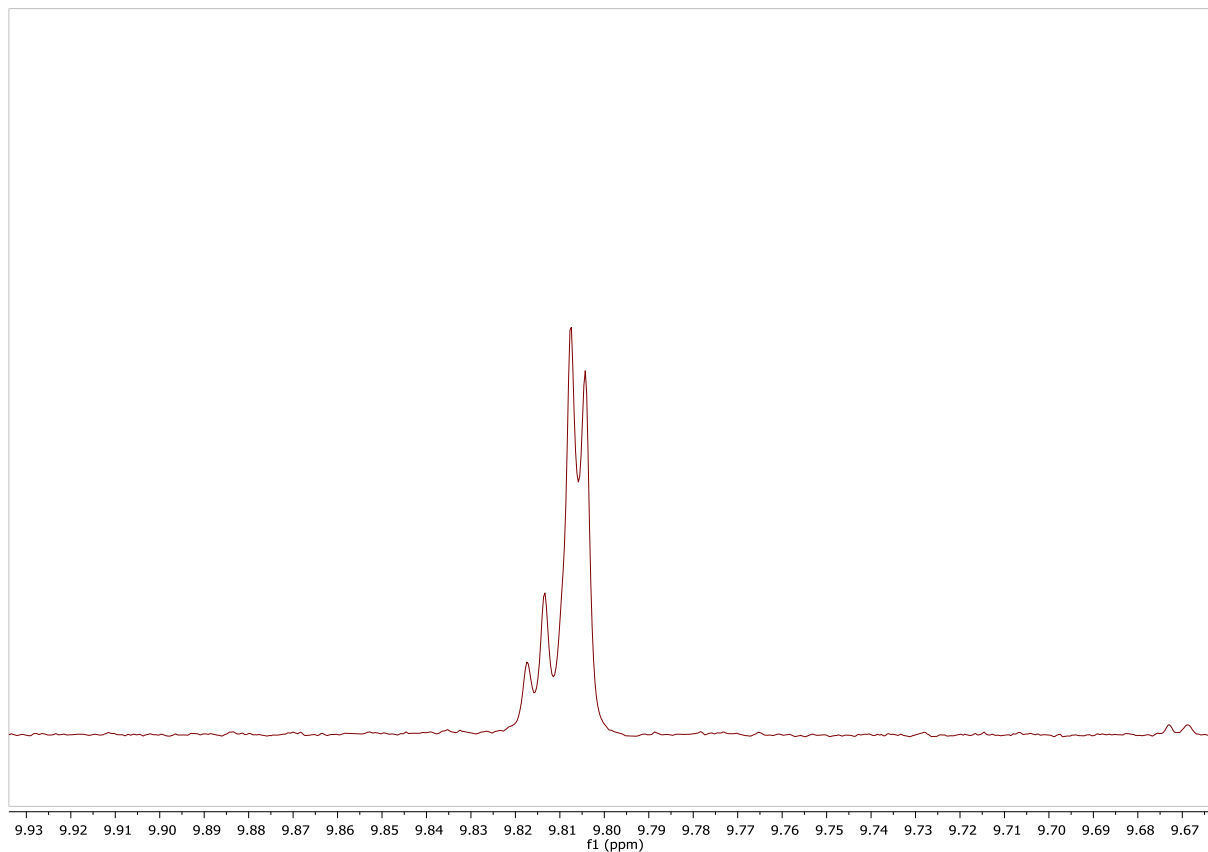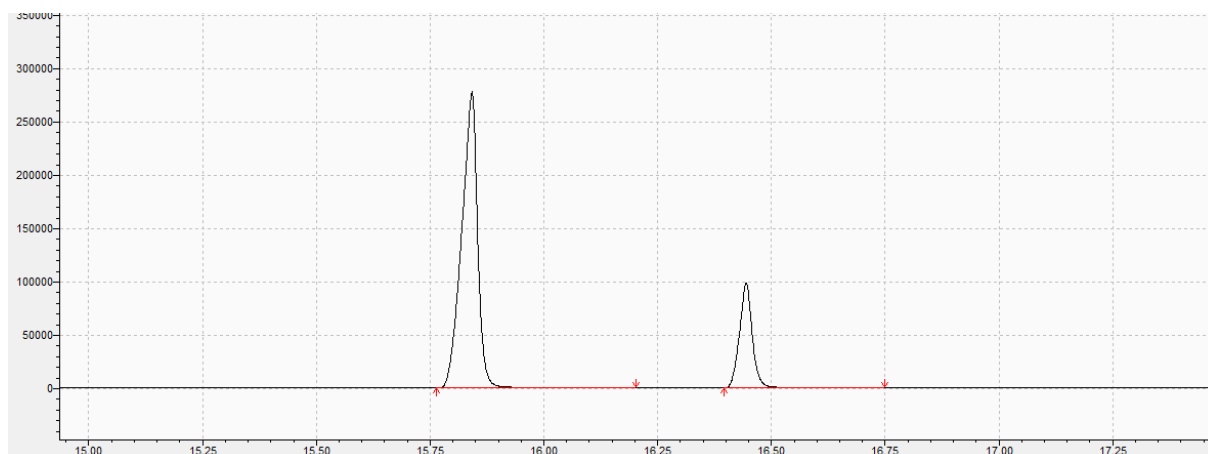

| Retention time | Area   |          | l/b ratio |
|----------------|--------|----------|-----------|
| 15.842         | 675010 | Branched | 0.29      |
| 16.444         | 194156 | Linear   |           |

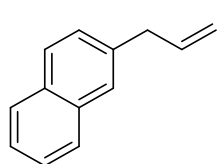

Rh/P<sub>m</sub>Py<sub>3</sub>  
 0,1 mol%  
 20 bar H<sub>2</sub>:CO  
 48 hrs, 25°C  
 Toluene

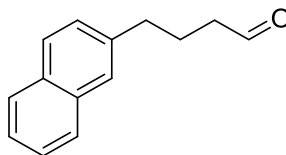

linear

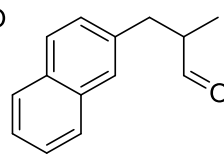

branched

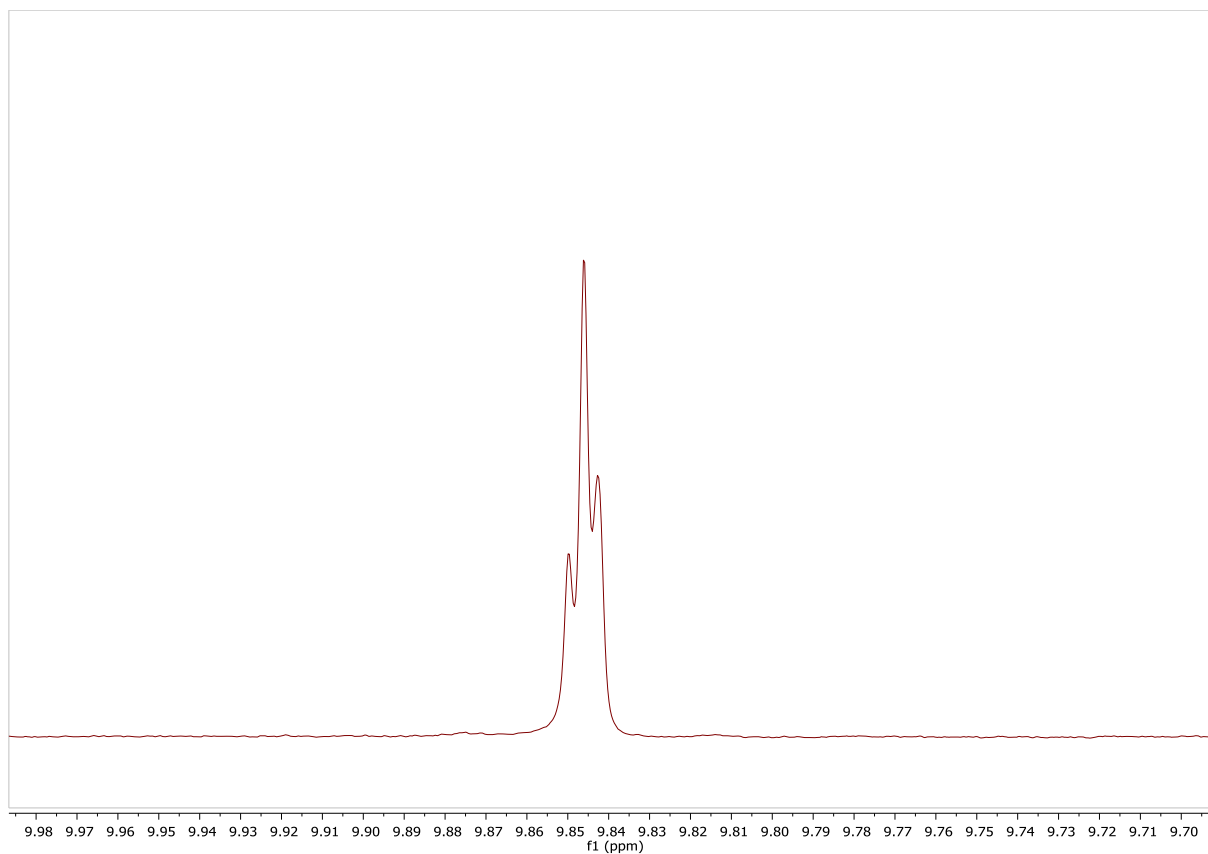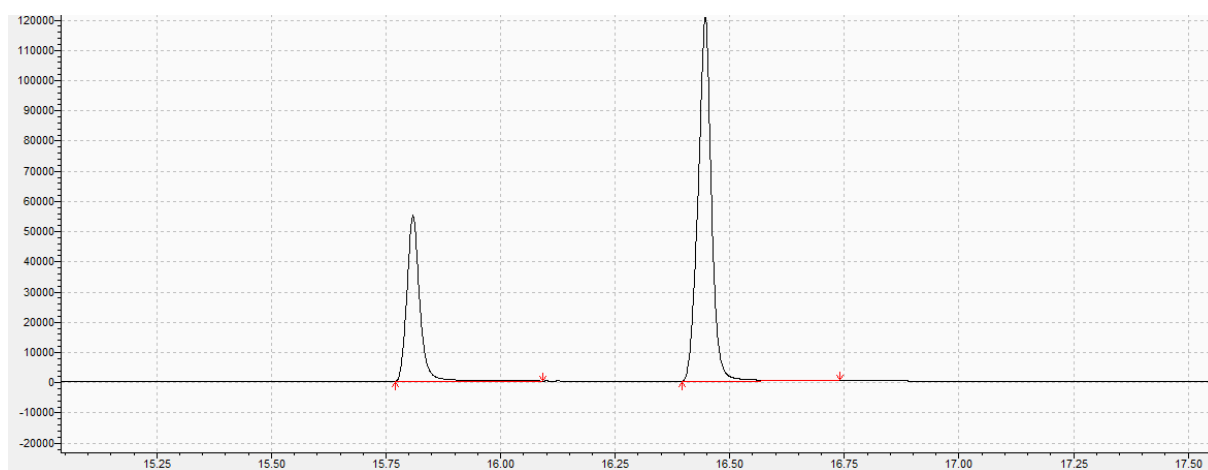

| Retention time | Area   |          | l/b ratio |
|----------------|--------|----------|-----------|
| 15.809         | 106270 | Branched | 2.3       |
| 16.447         | 245019 | Linear   |           |

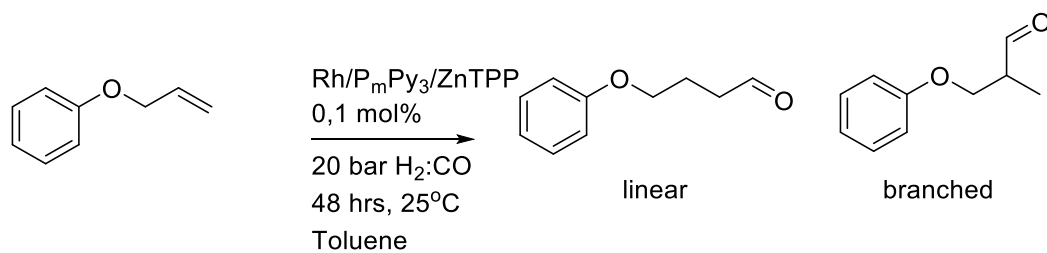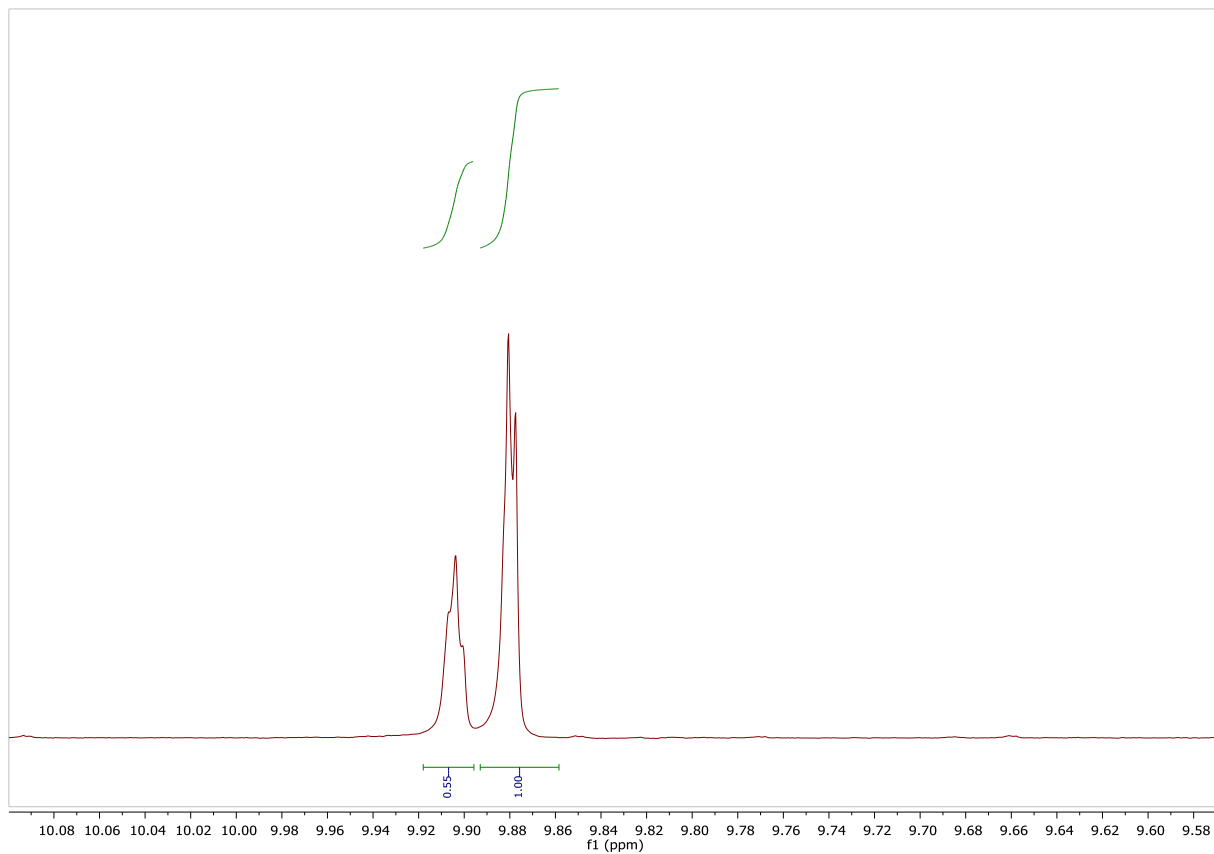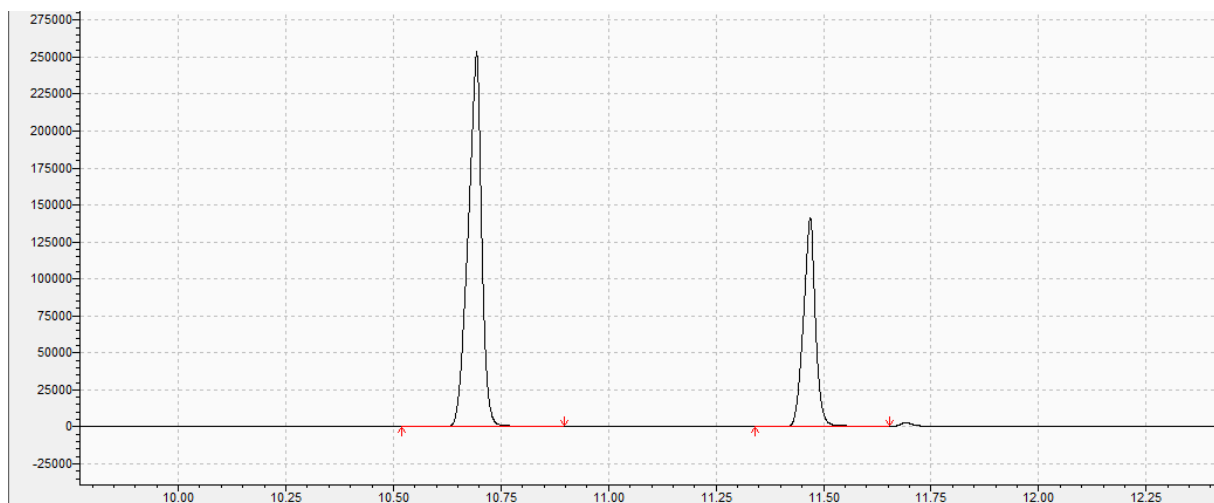

| Retention time | area   |          | l/b ratio |
|----------------|--------|----------|-----------|
| 10,693         | 551755 | Branhced | 0.49      |
| 11,469         | 271895 | linear   |           |



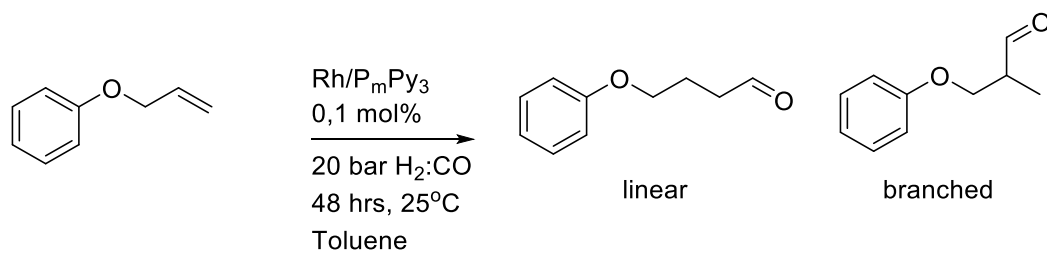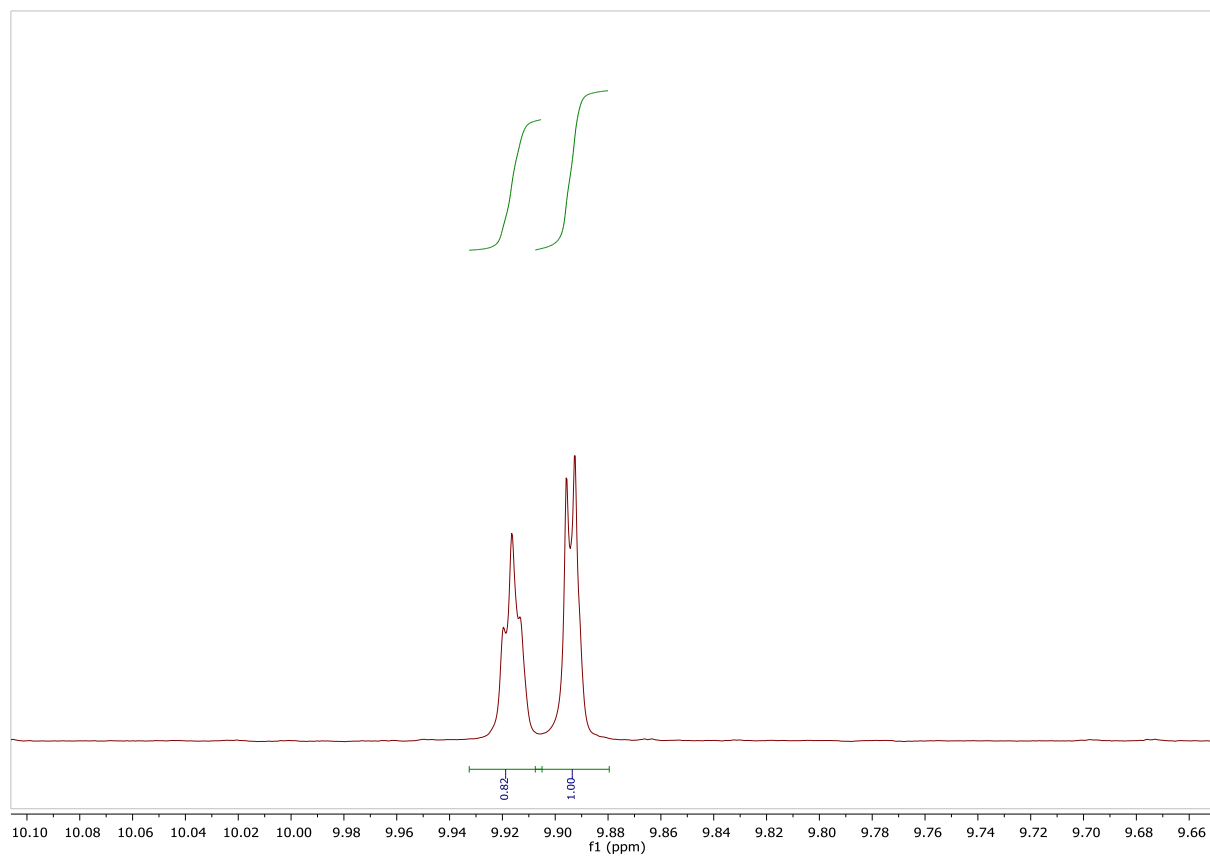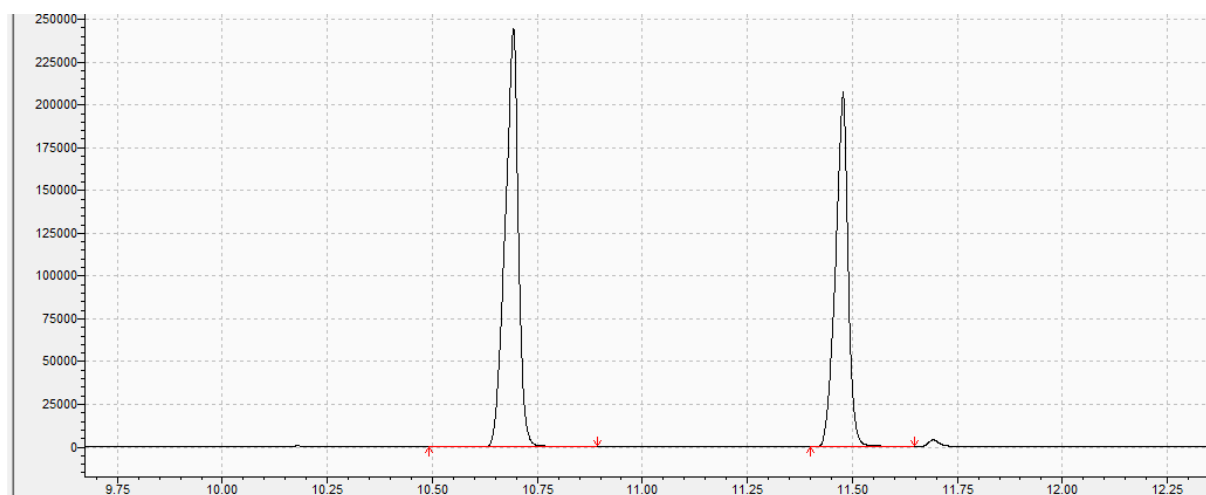

| Retention time | area   |          | l/b ratio |
|----------------|--------|----------|-----------|
| 10,693         | 534301 | Branched | 0.81      |
| 11,478         | 430359 | Linear   |           |

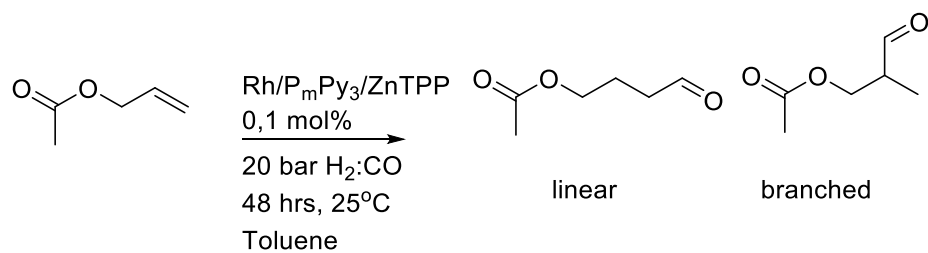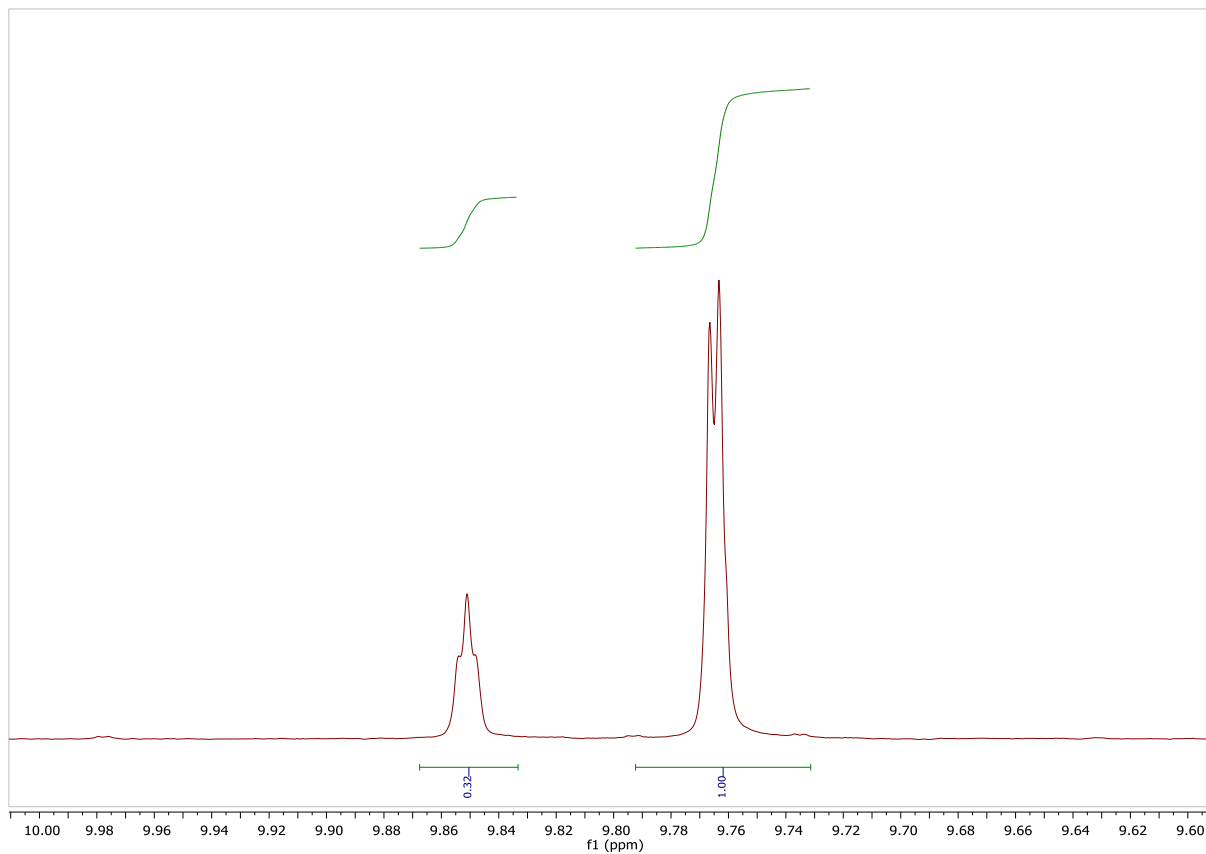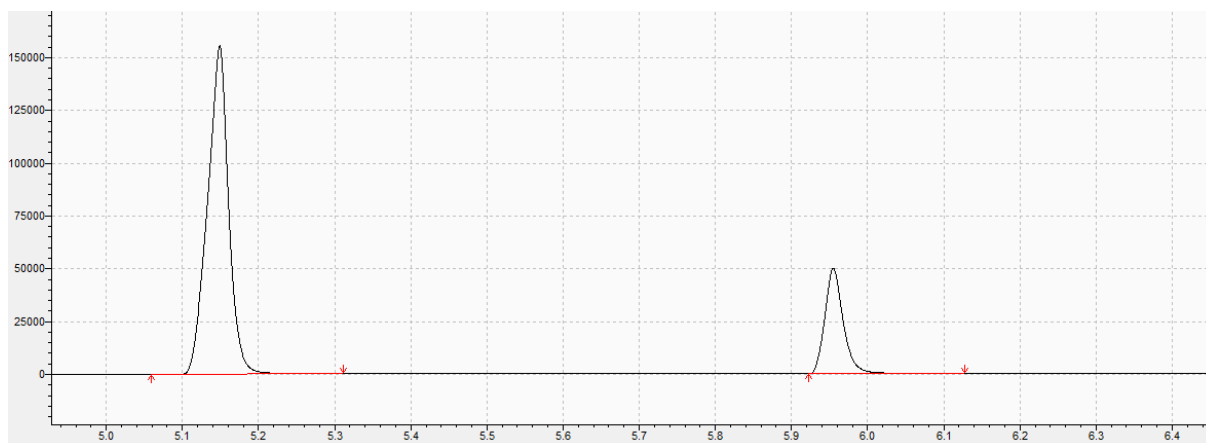

| Retention time | Area   |          | l/b ratio |
|----------------|--------|----------|-----------|
| 5,149          | 296142 | Branched | 0.28      |
| 5,955          | 83859  | linear   |           |

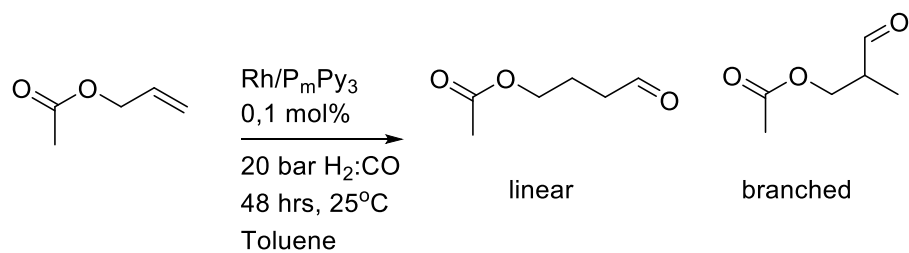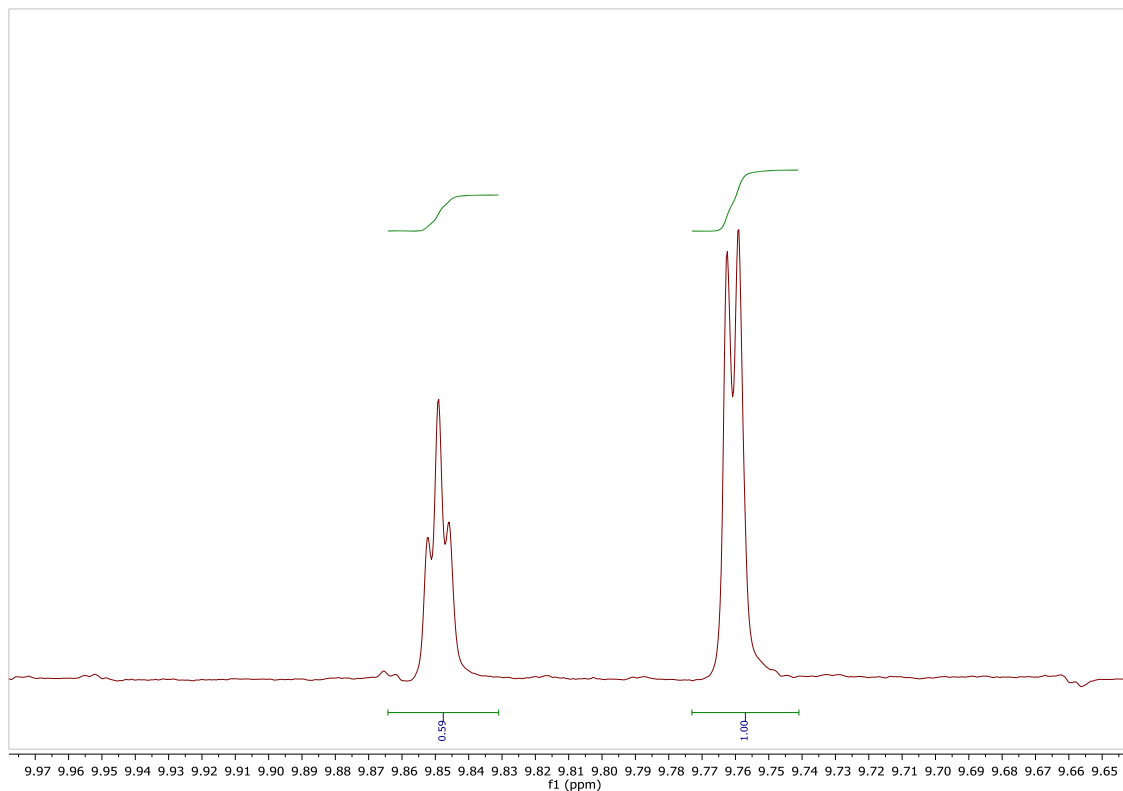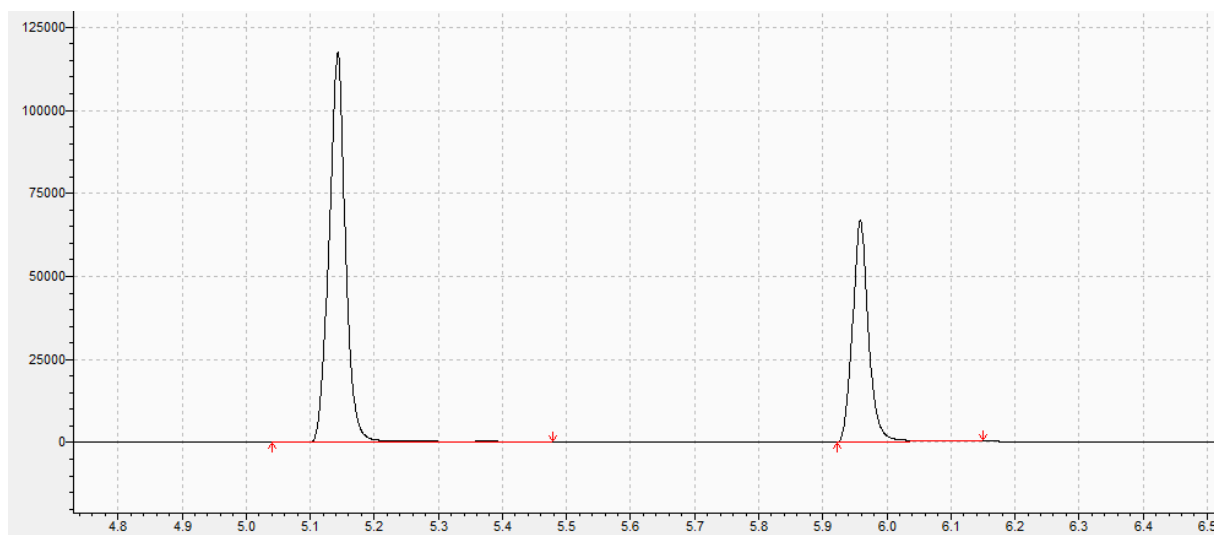

| Retention time | Area   |          | I/b ratio |
|----------------|--------|----------|-----------|
|                |        | Branched | 0,55      |
| 5,143          | 208037 |          |           |
| 5,959          | 115130 | Linear   |           |

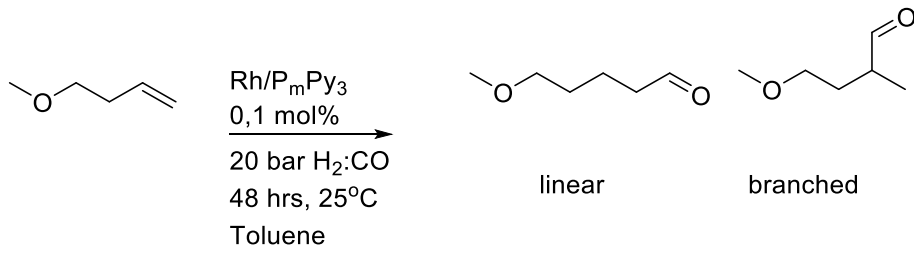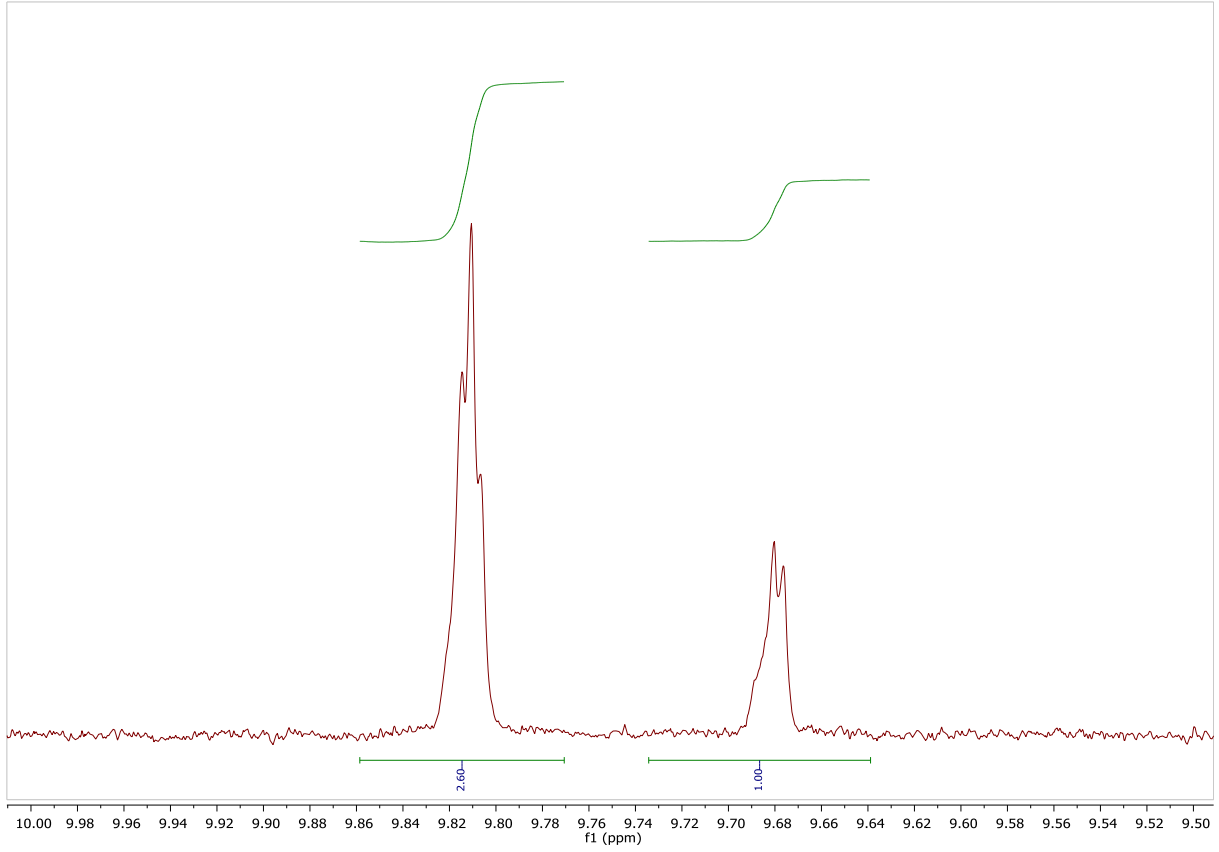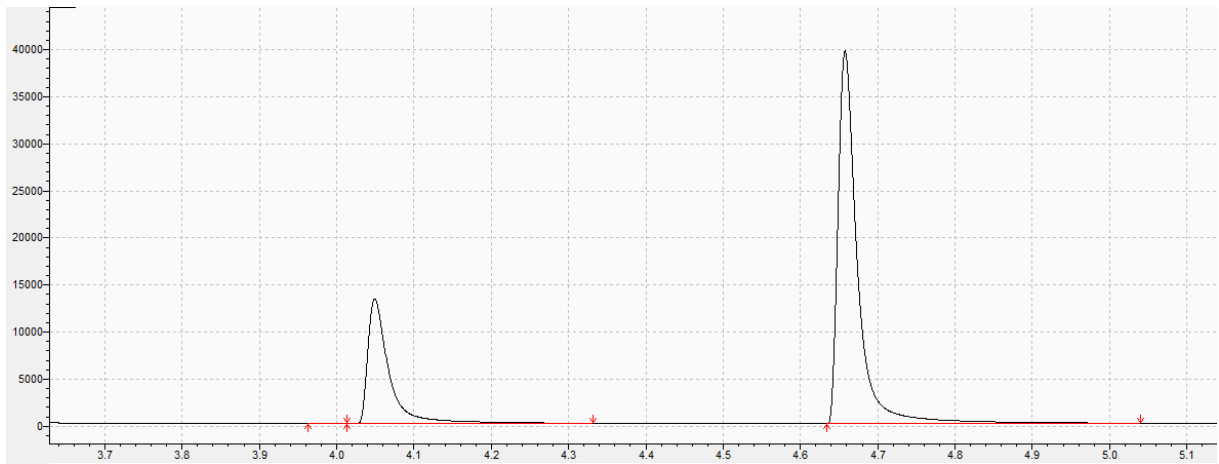

| Retention time | Area  |          | l/b ratio |
|----------------|-------|----------|-----------|
| 4.050          | 25122 | Branched | 2.77      |
| 4.658          | 69836 | Linear   |           |

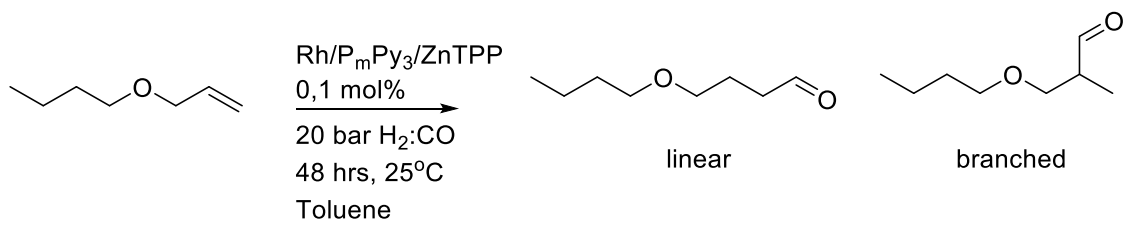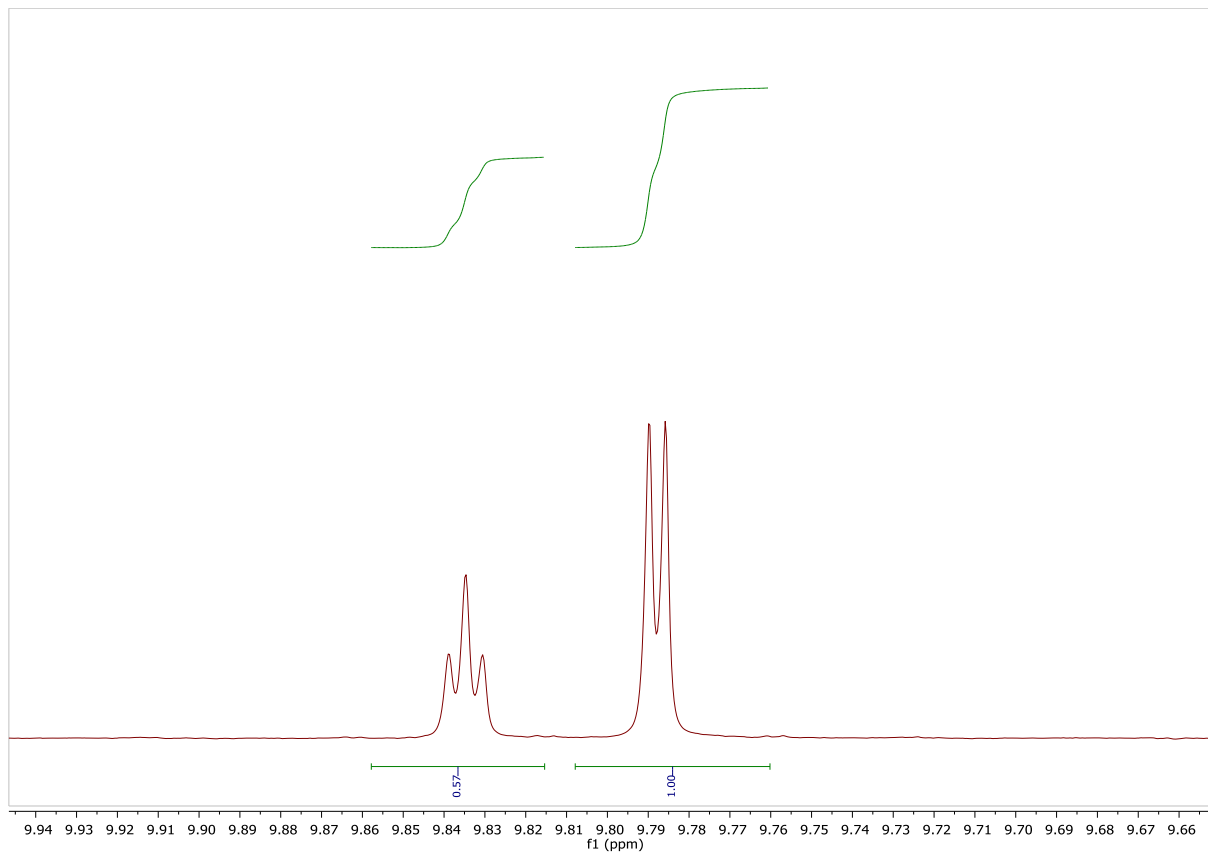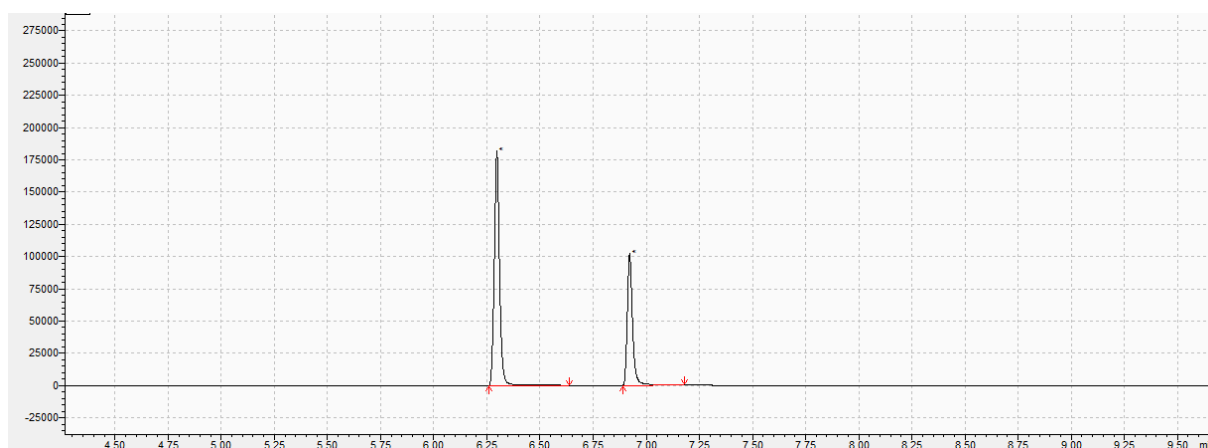

| Retention time | Area   |          | I/b ratio |
|----------------|--------|----------|-----------|
| 6.297          | 309236 | Branched | 0.56      |
| 6.922          | 175534 | Linear   |           |

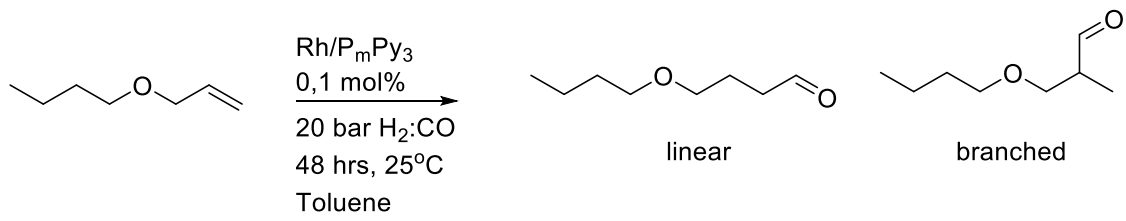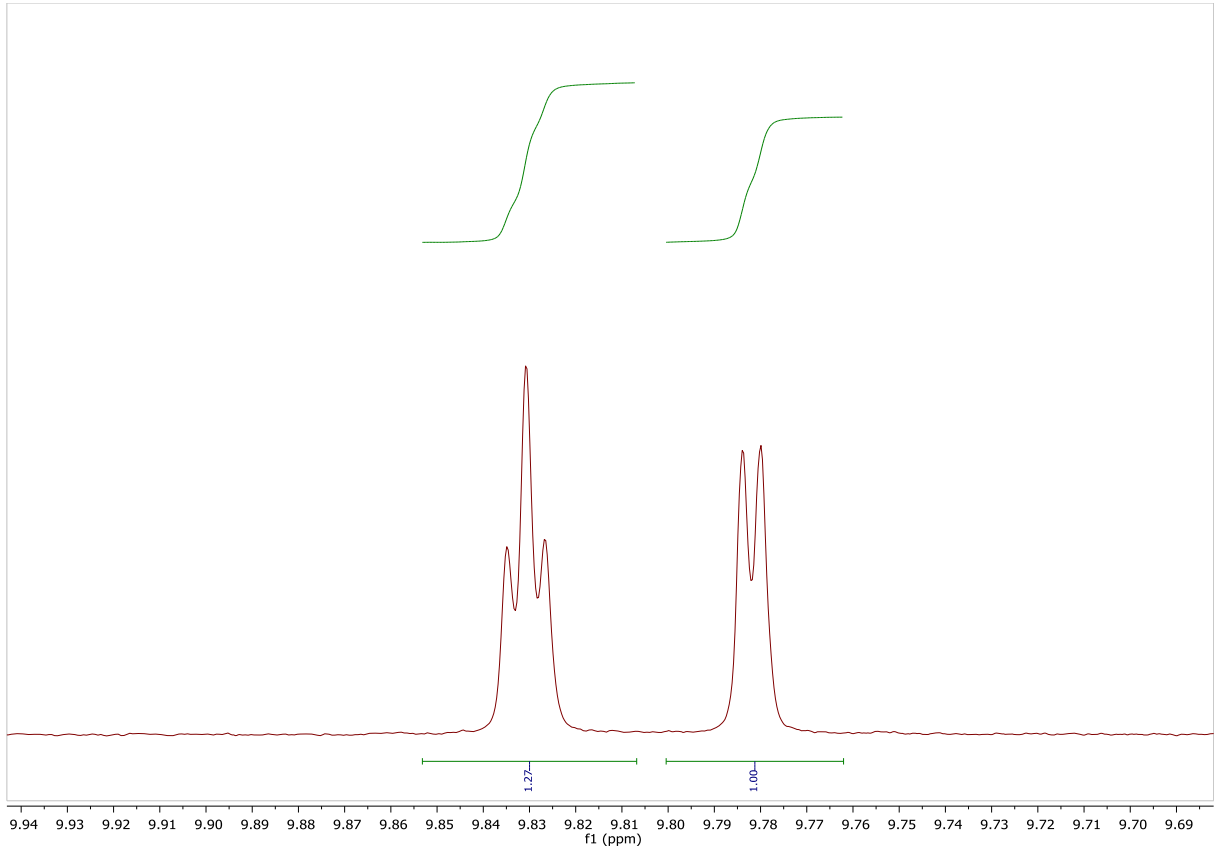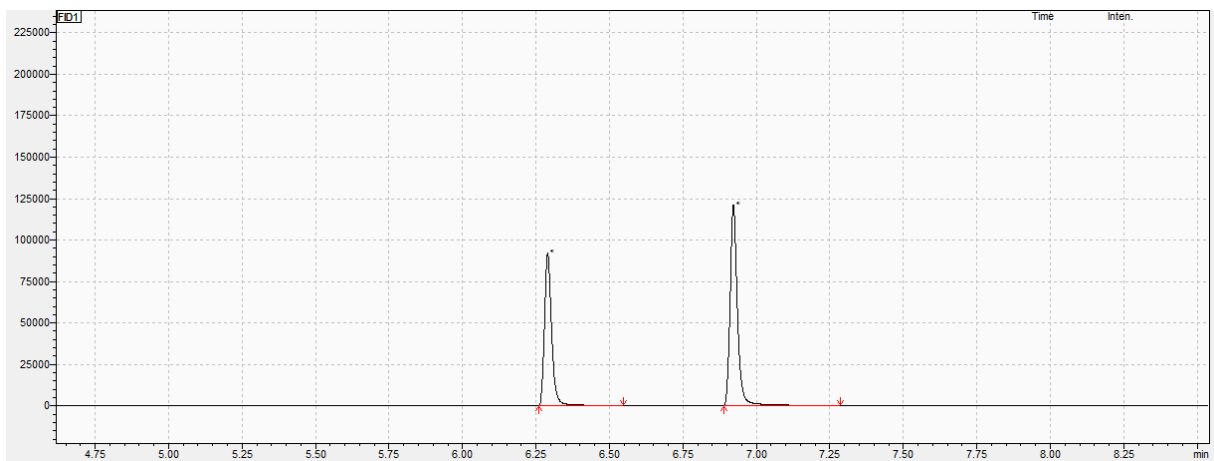

| Retention time | Area   |          | I/b ratio |
|----------------|--------|----------|-----------|
| 6.290          | 153685 | Branched | 1.37      |
| 6.922          | 210656 | Linear   |           |

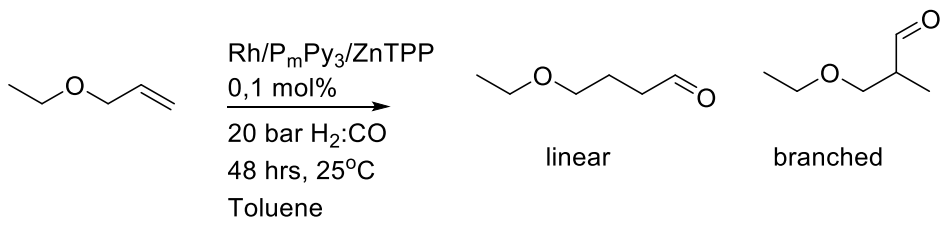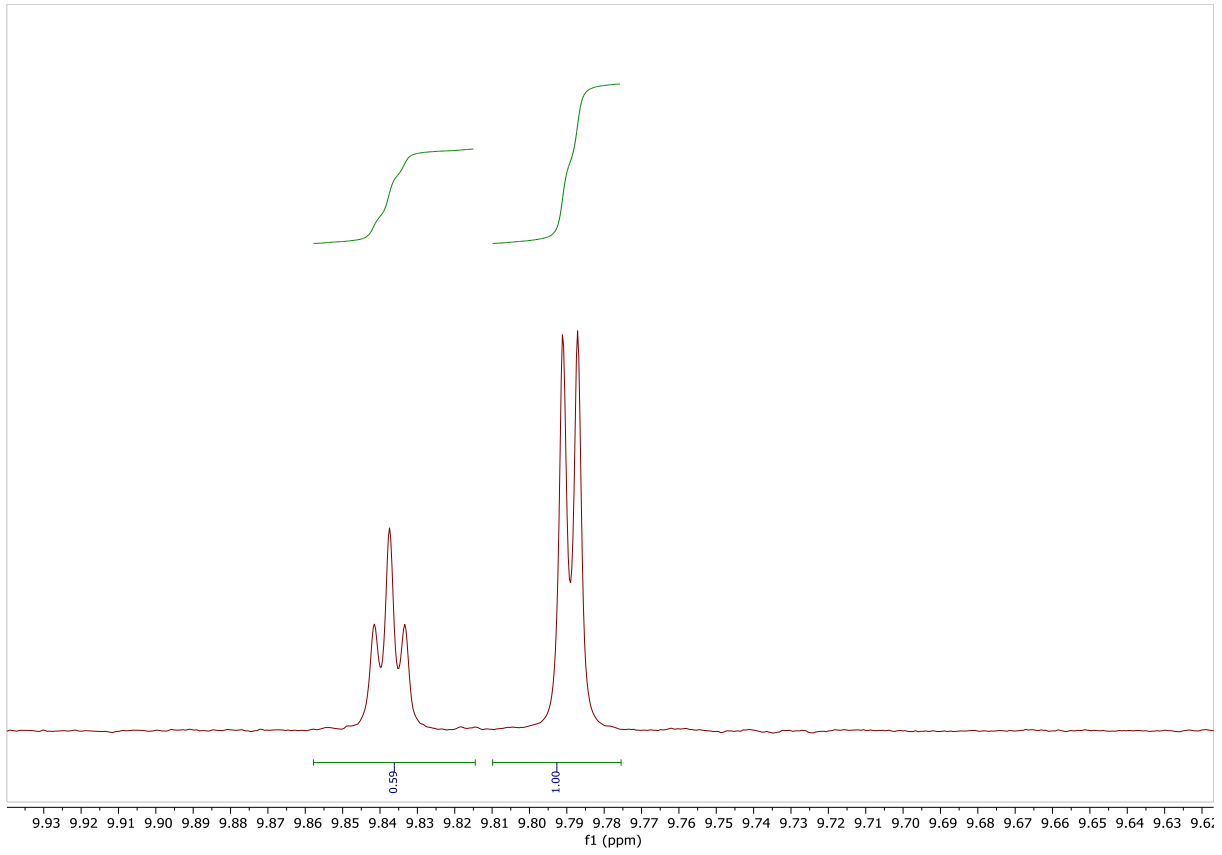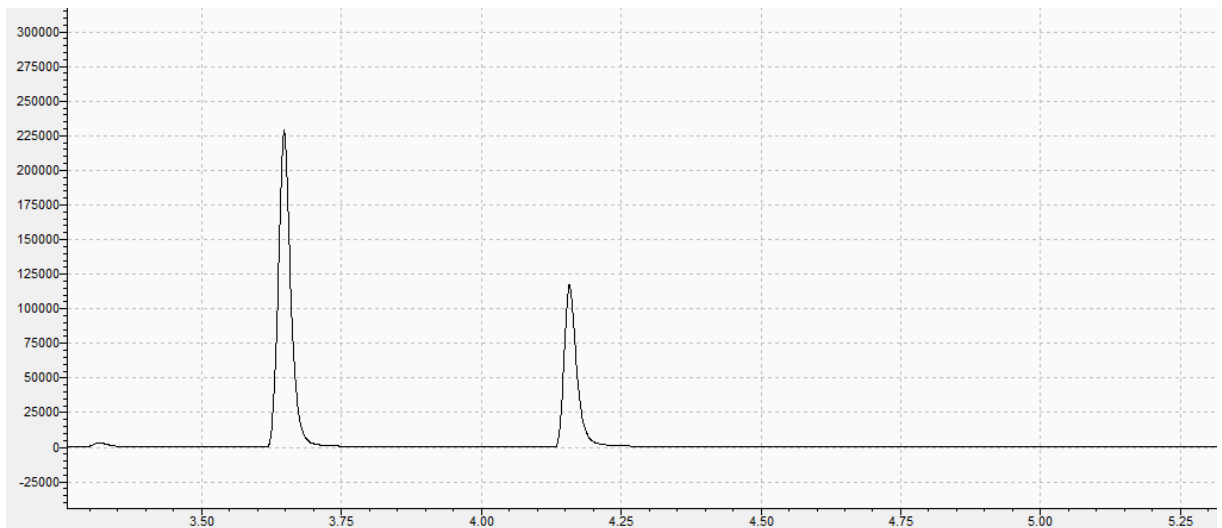

| Retention time | Area   |          | l/b ratio |
|----------------|--------|----------|-----------|
| 3.648          | 357585 | Branched | 0.52      |
| 4.158          | 188152 | Linear   |           |

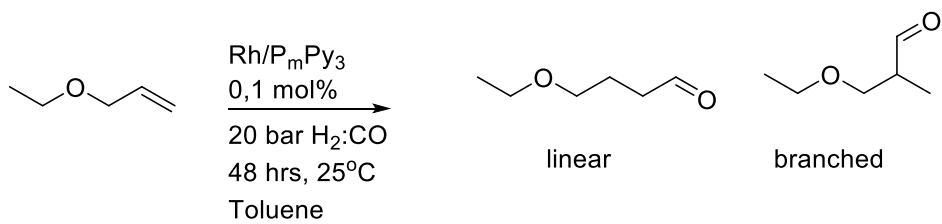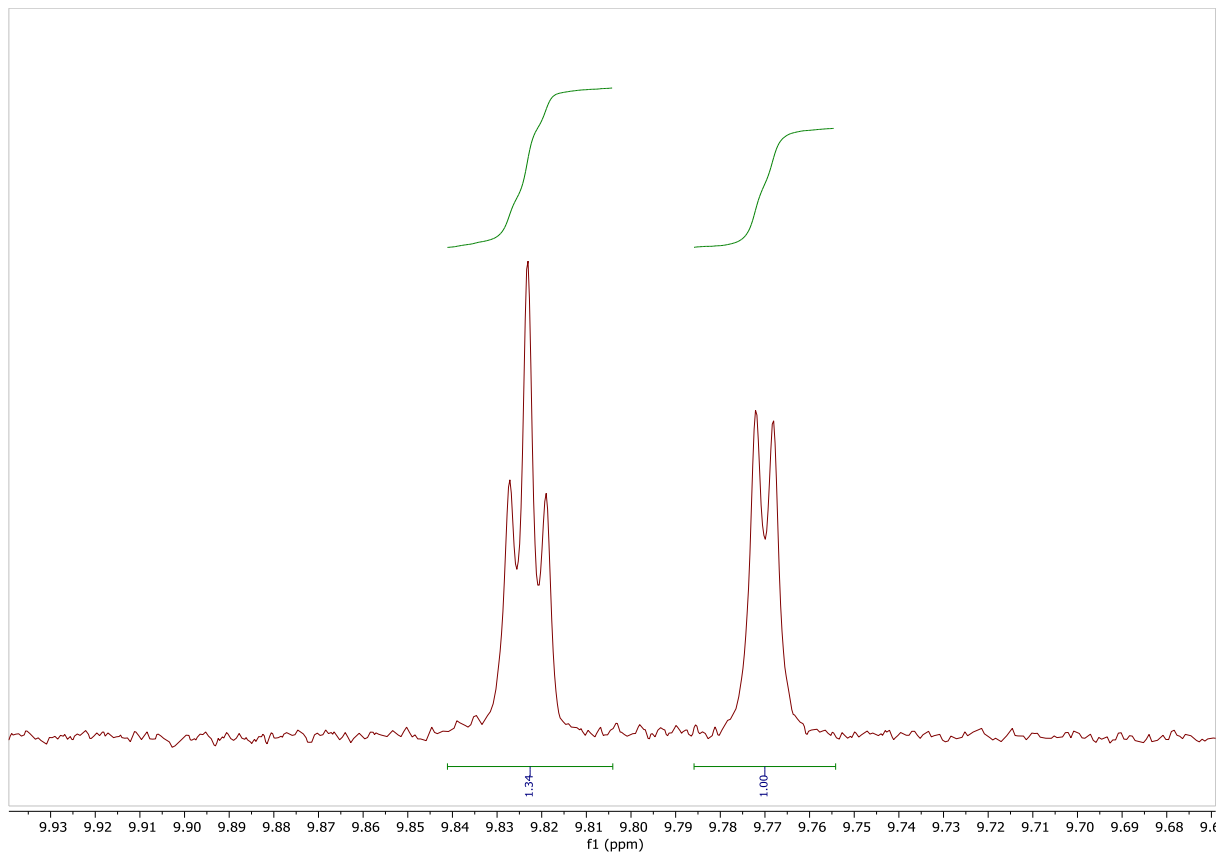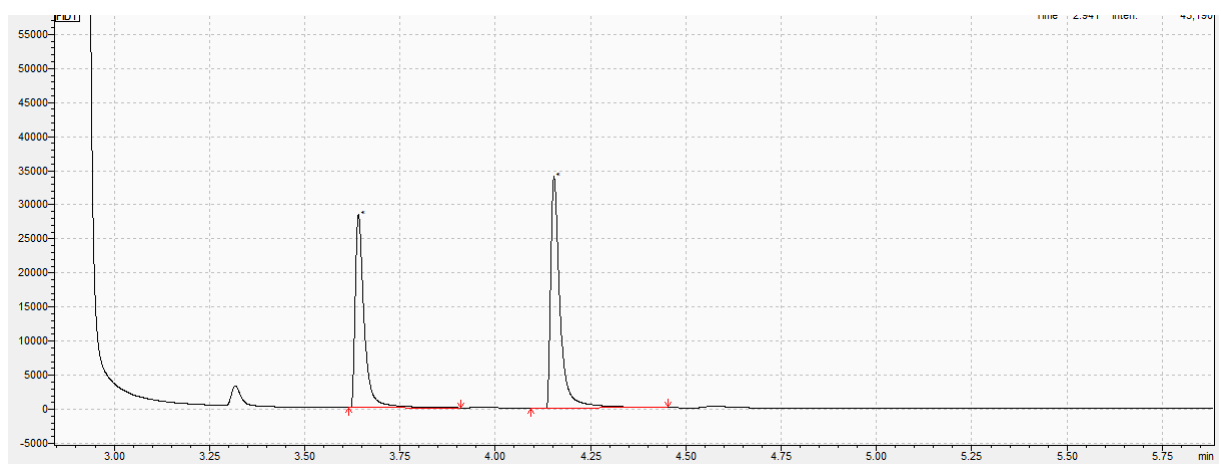

| Retention time | Area  |          | I/b ratio |
|----------------|-------|----------|-----------|
| 3.641          | 47225 | Branched | 1.24      |
| 4.154          | 58604 | Linear   |           |



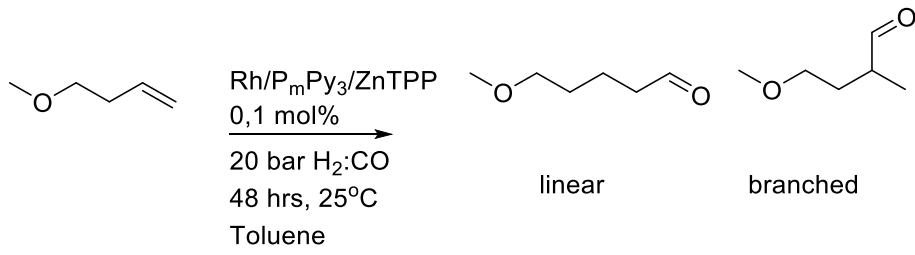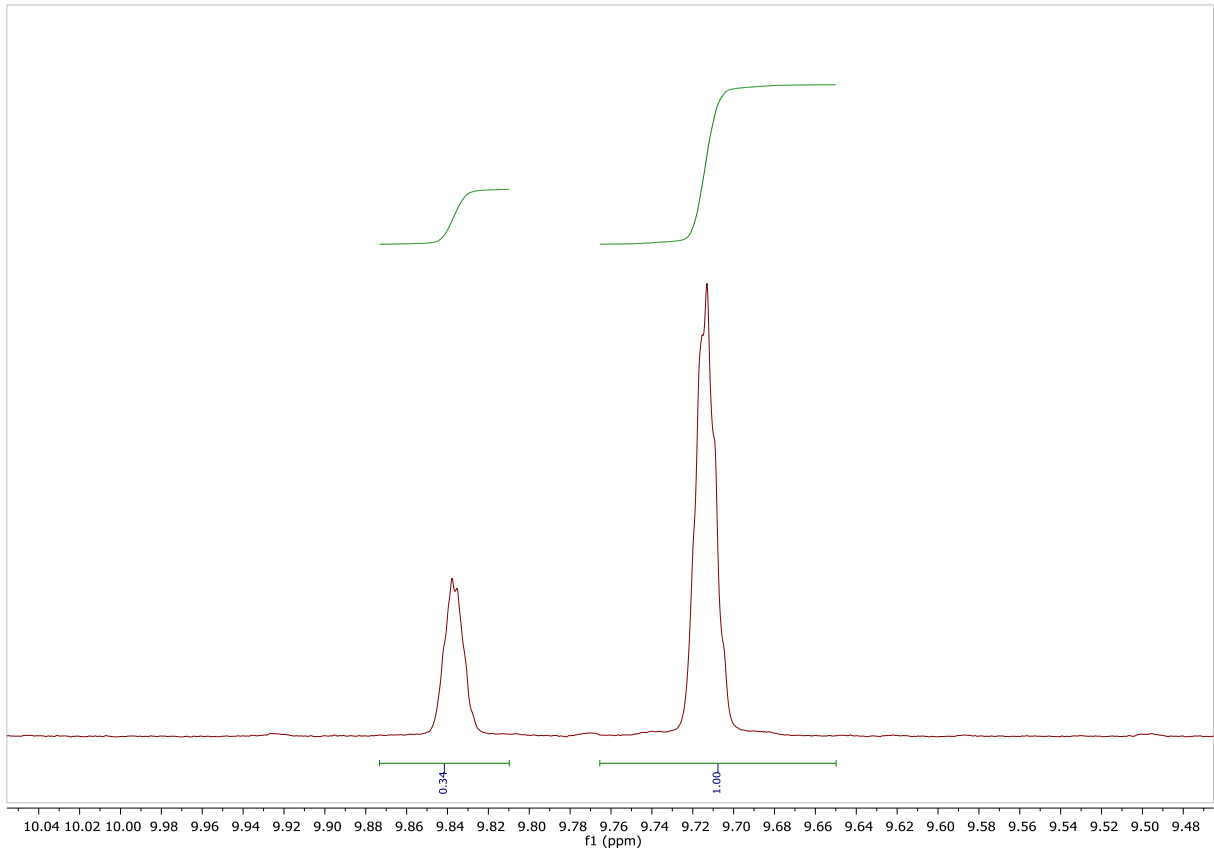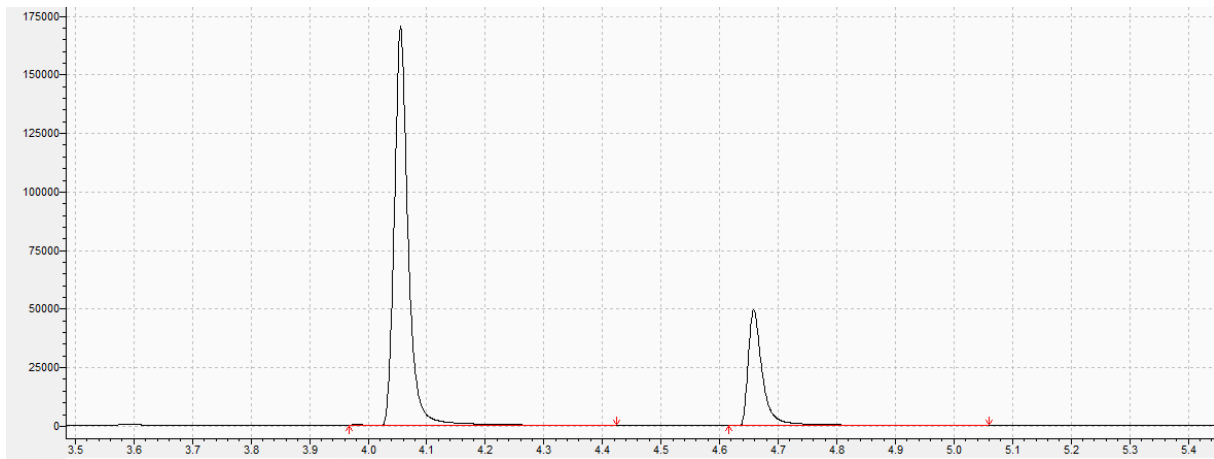

| Retention time | Area   |          | l/b ratio |
|----------------|--------|----------|-----------|
| 4.055          | 278529 | Branched | 0.30      |
| 4.658          | 84464  | Linear   |           |

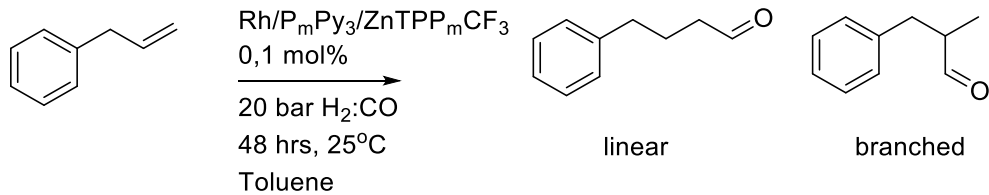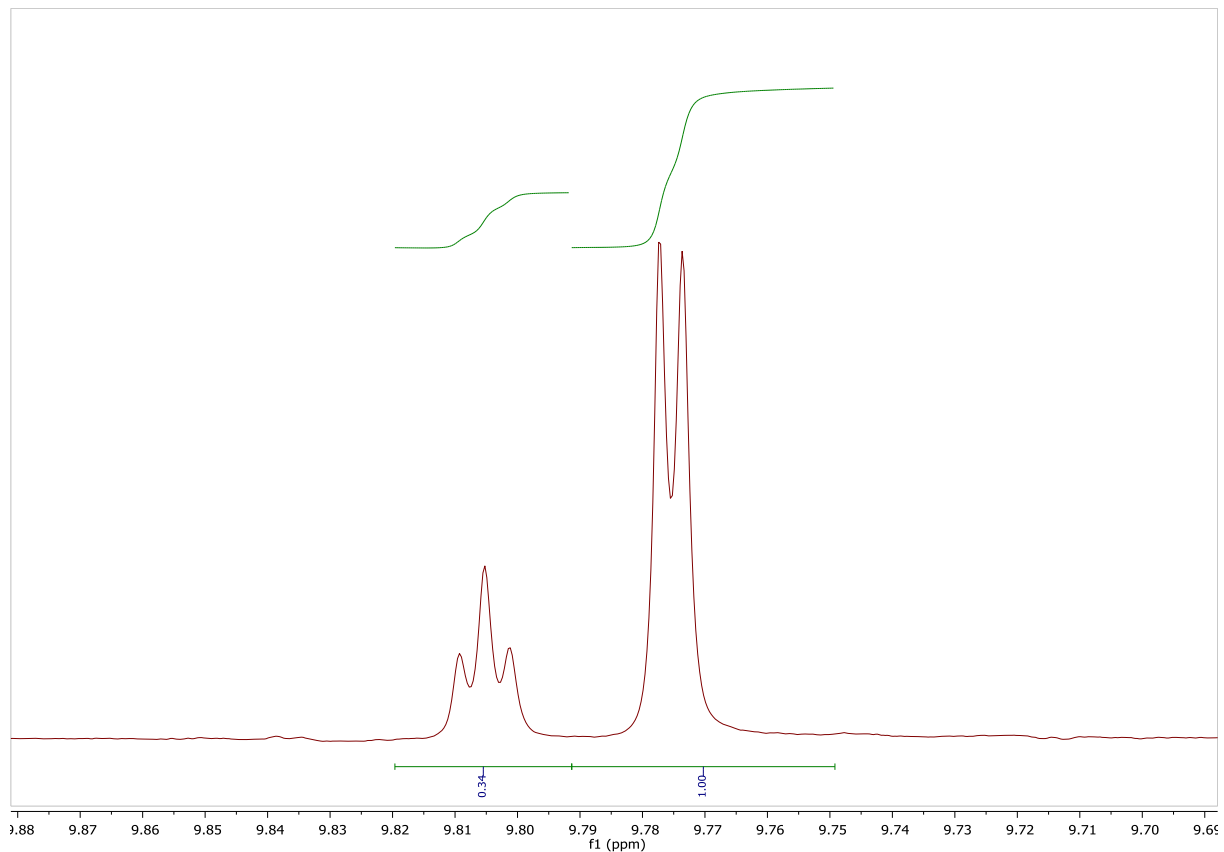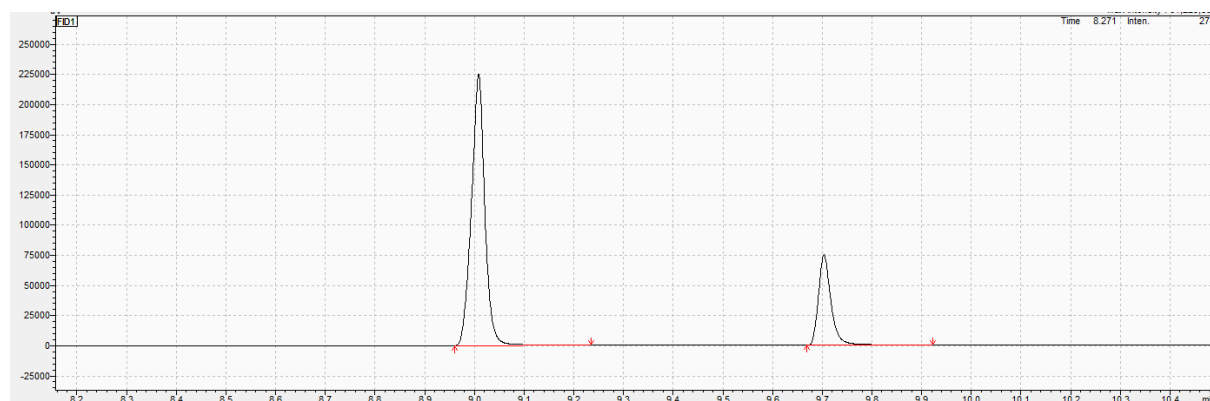

| Retention time | Area   |          | I/b ratio |
|----------------|--------|----------|-----------|
| 9.008          | 420479 | Branched | 0.31      |
| 9.704          | 133089 | Linear   |           |

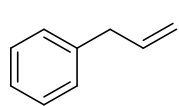

Rh/P<sub>m</sub>Py<sub>3</sub>/ZnTPP<sub>m</sub>O<sub>i</sub>Pr  
 0,1 mol%  
 20 bar H<sub>2</sub>:CO  
 48 hrs, 25°C  
 Toluene

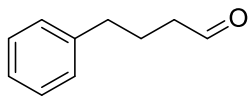

linear

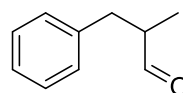

branched

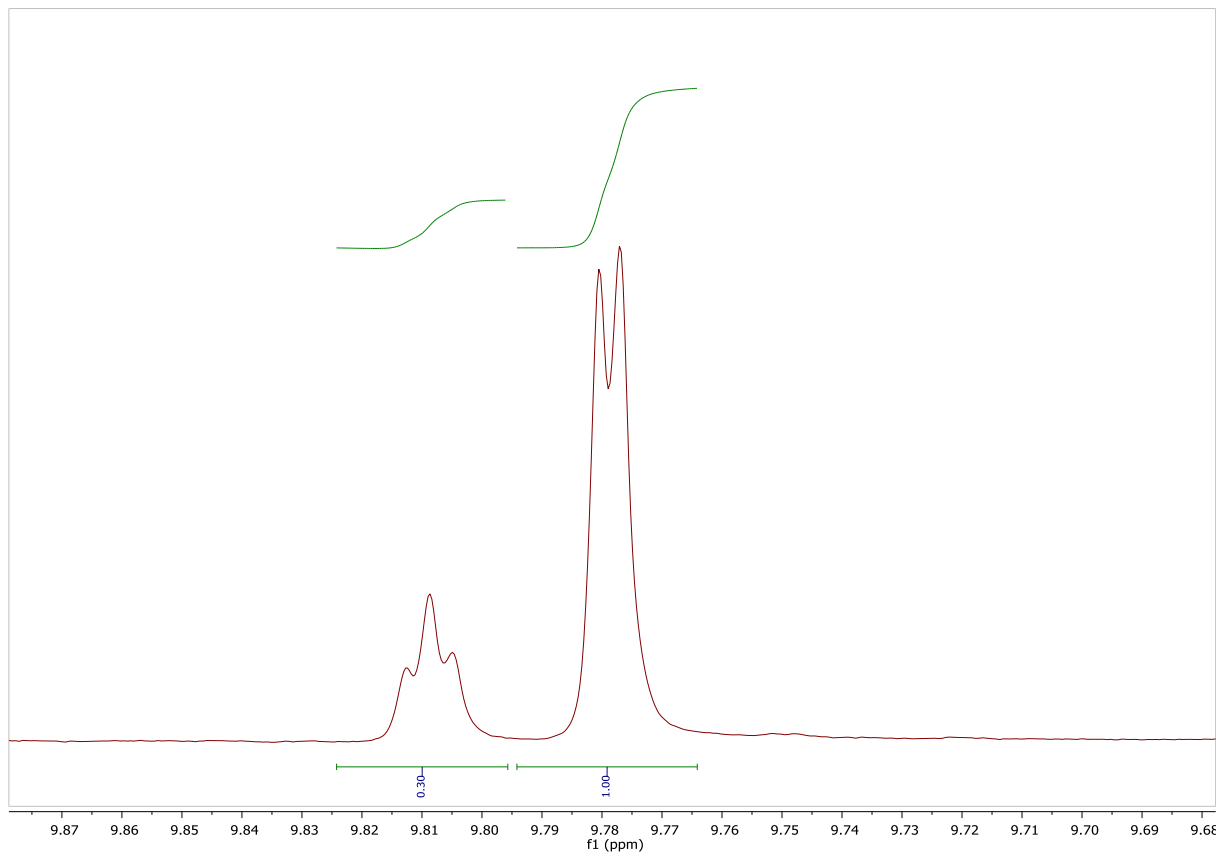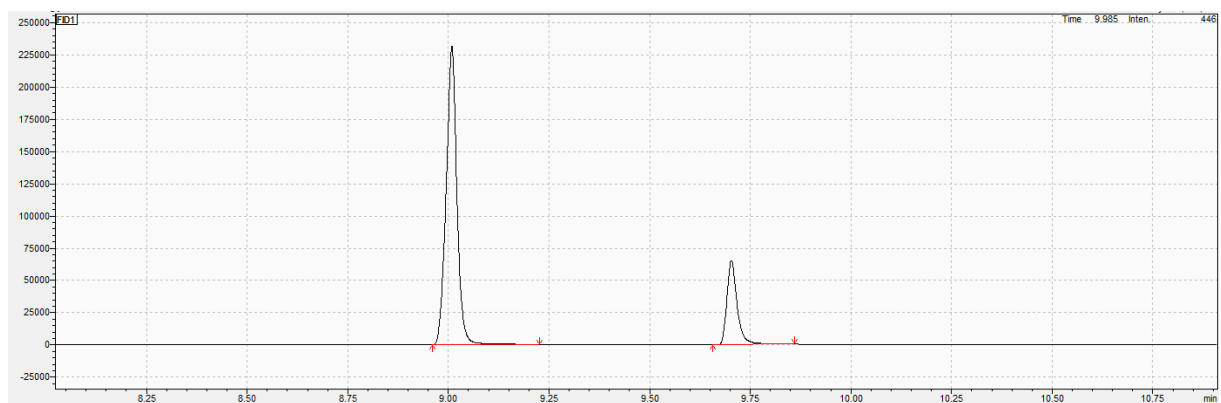

| Retention time | Area   |          | I/b ratio |
|----------------|--------|----------|-----------|
| 9.009          | 430000 | Branched | 0.26      |
| 9.703          | 114749 | Linear   |           |

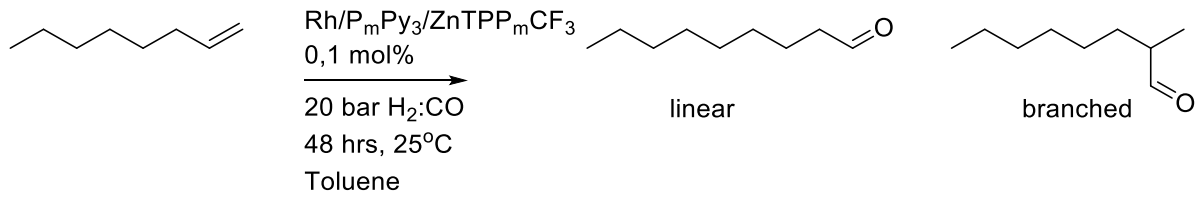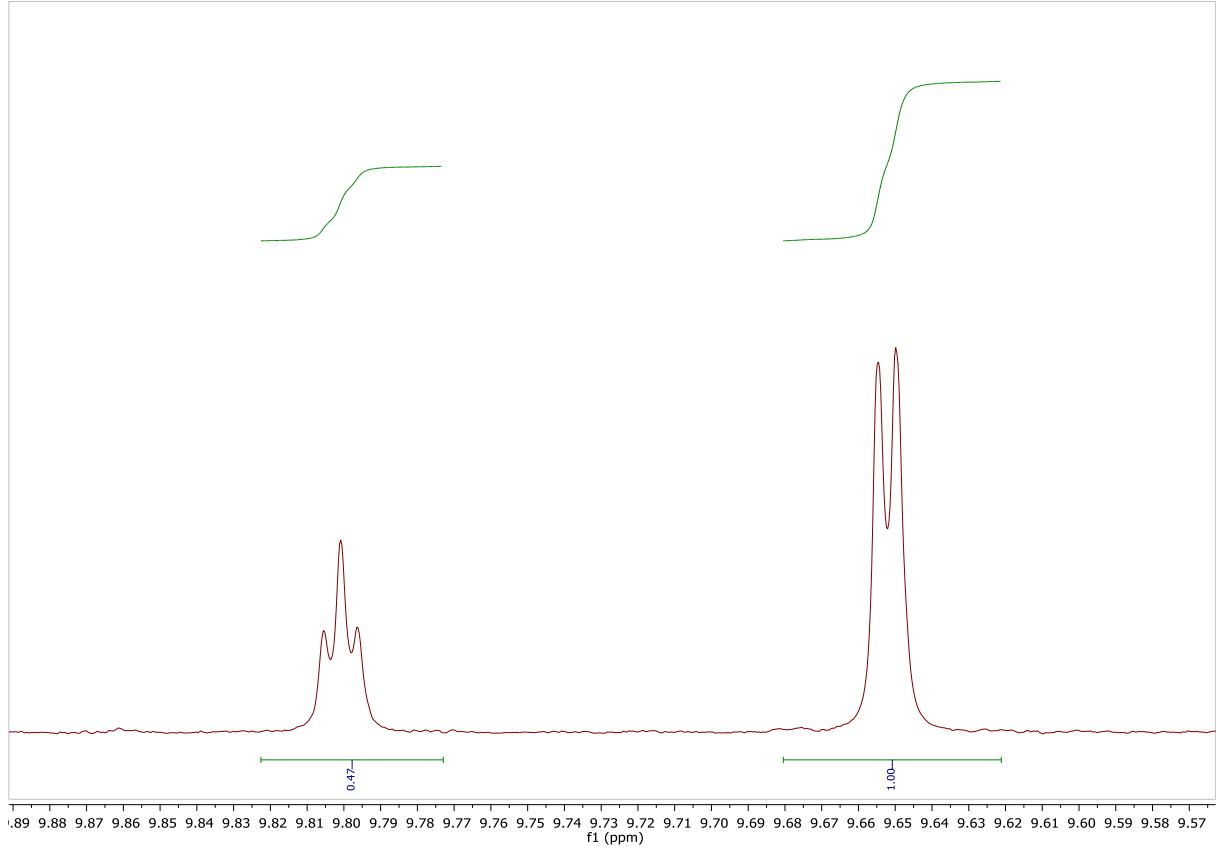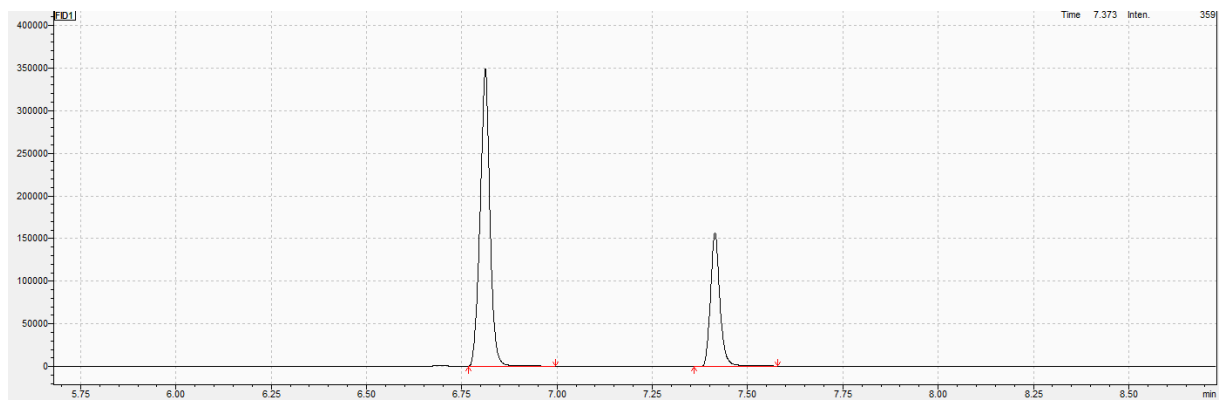

| Retention time | Area   |          | l/b ratio |
|----------------|--------|----------|-----------|
| 6.805          | 381259 | Branched | 0.44      |
| 7.410          | 168008 | Linear   |           |

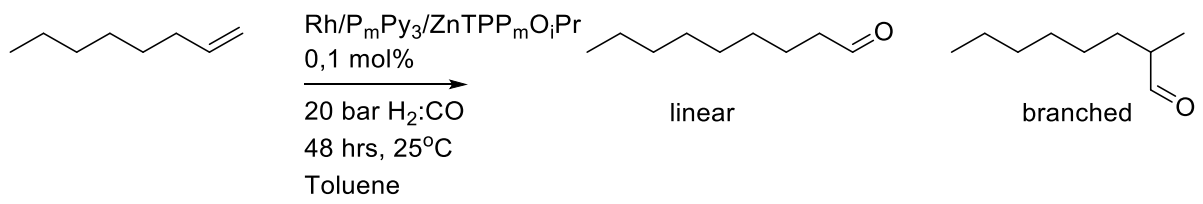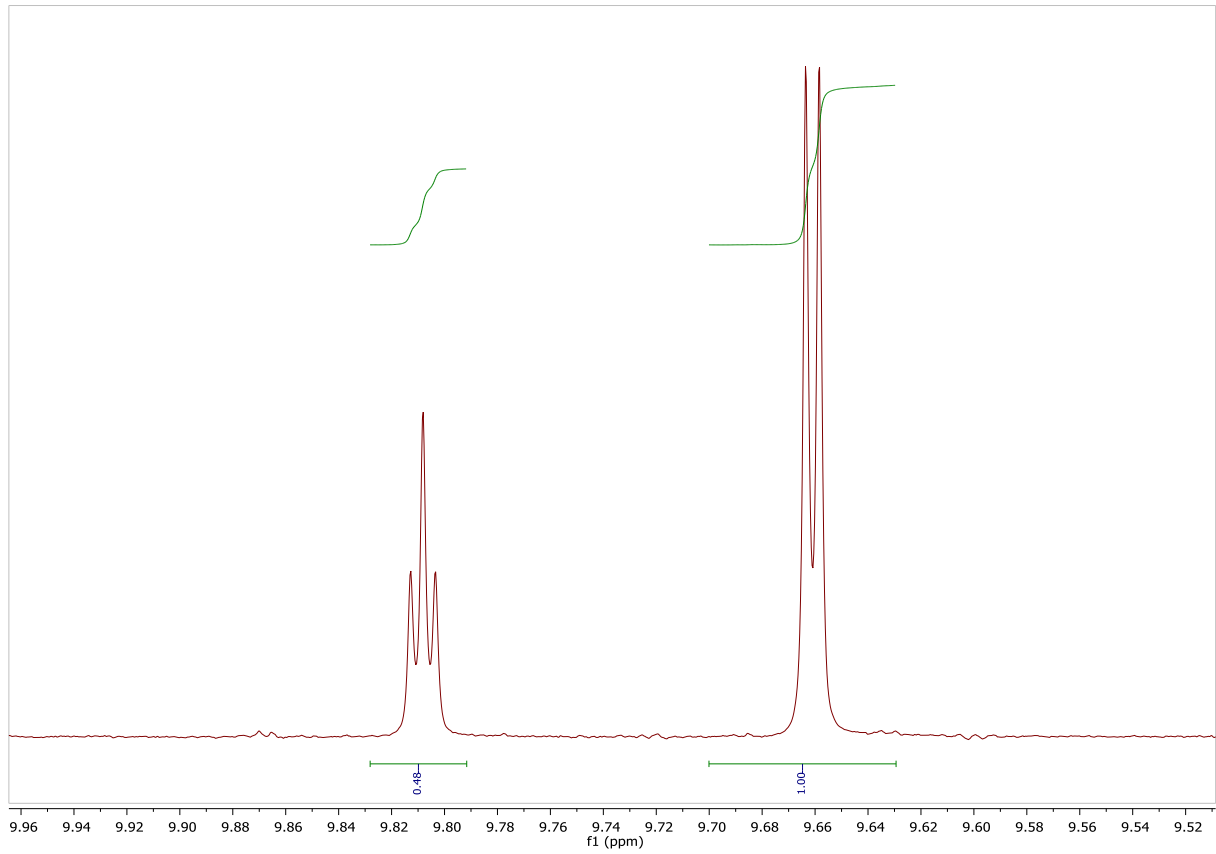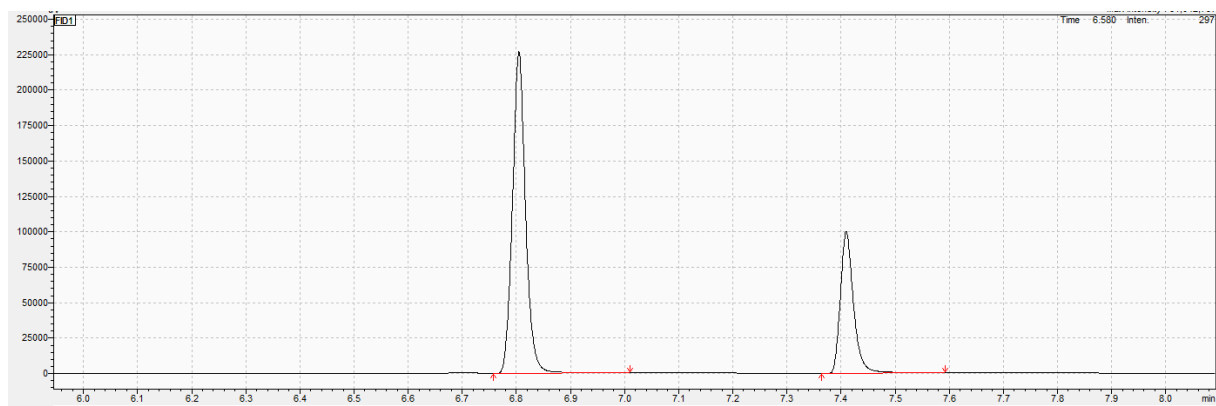

| Retention time | Area   |          | I/b ratio |
|----------------|--------|----------|-----------|
| 6.812          | 620366 | Branched | 0.42      |
| 7.414          | 266142 | Linear   |           |

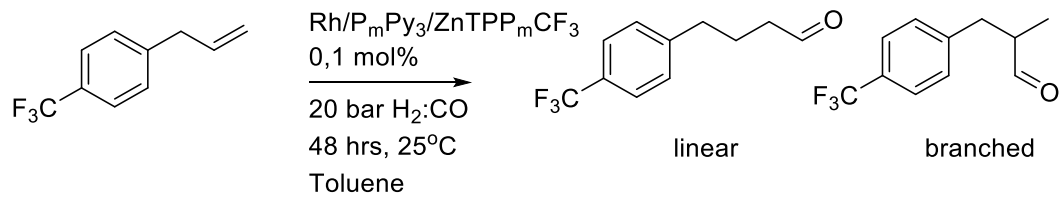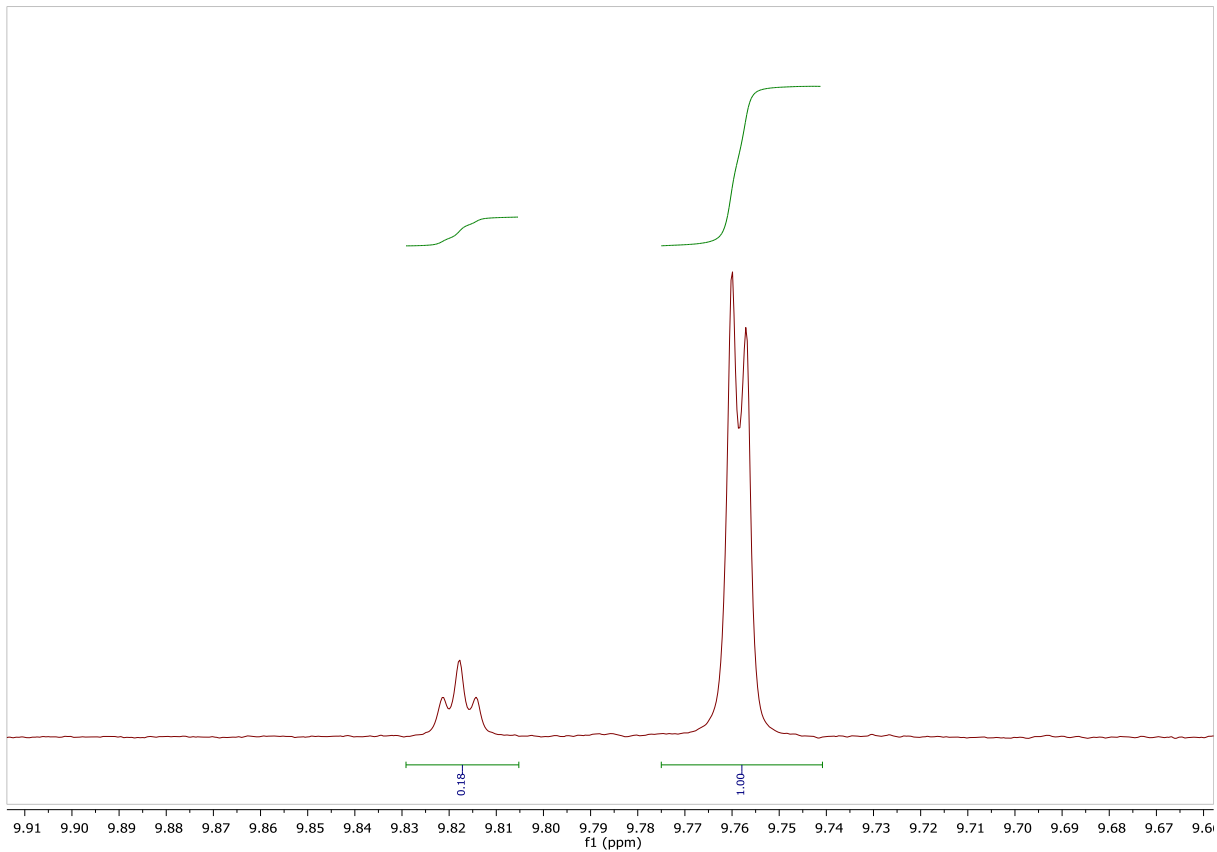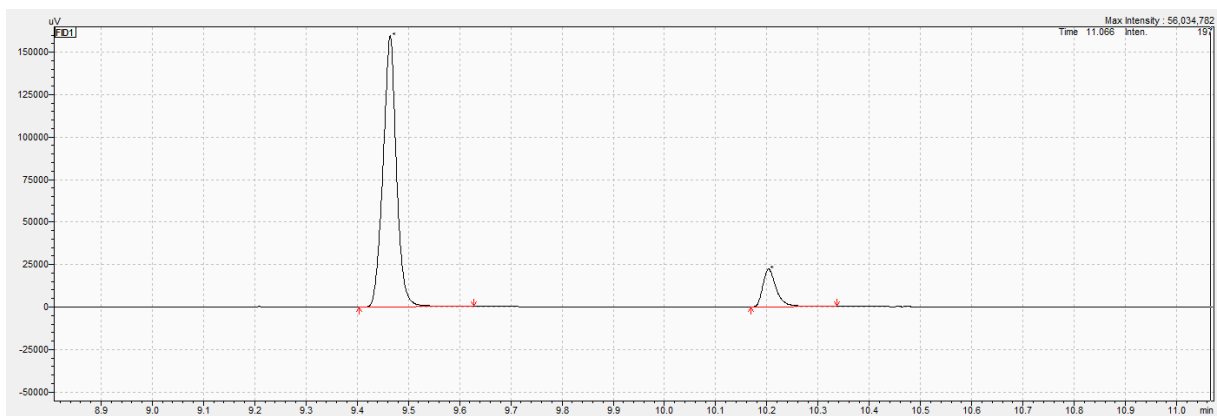

| Retention time | Area   |          | l/b ratio |
|----------------|--------|----------|-----------|
| 9.464          | 290015 | Branched | 0.14      |
| 10.203         | 40255  | Linear   |           |

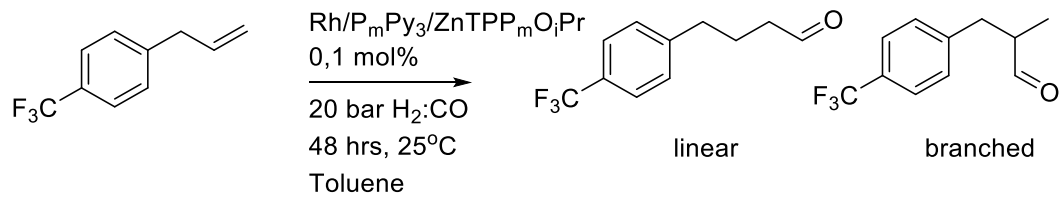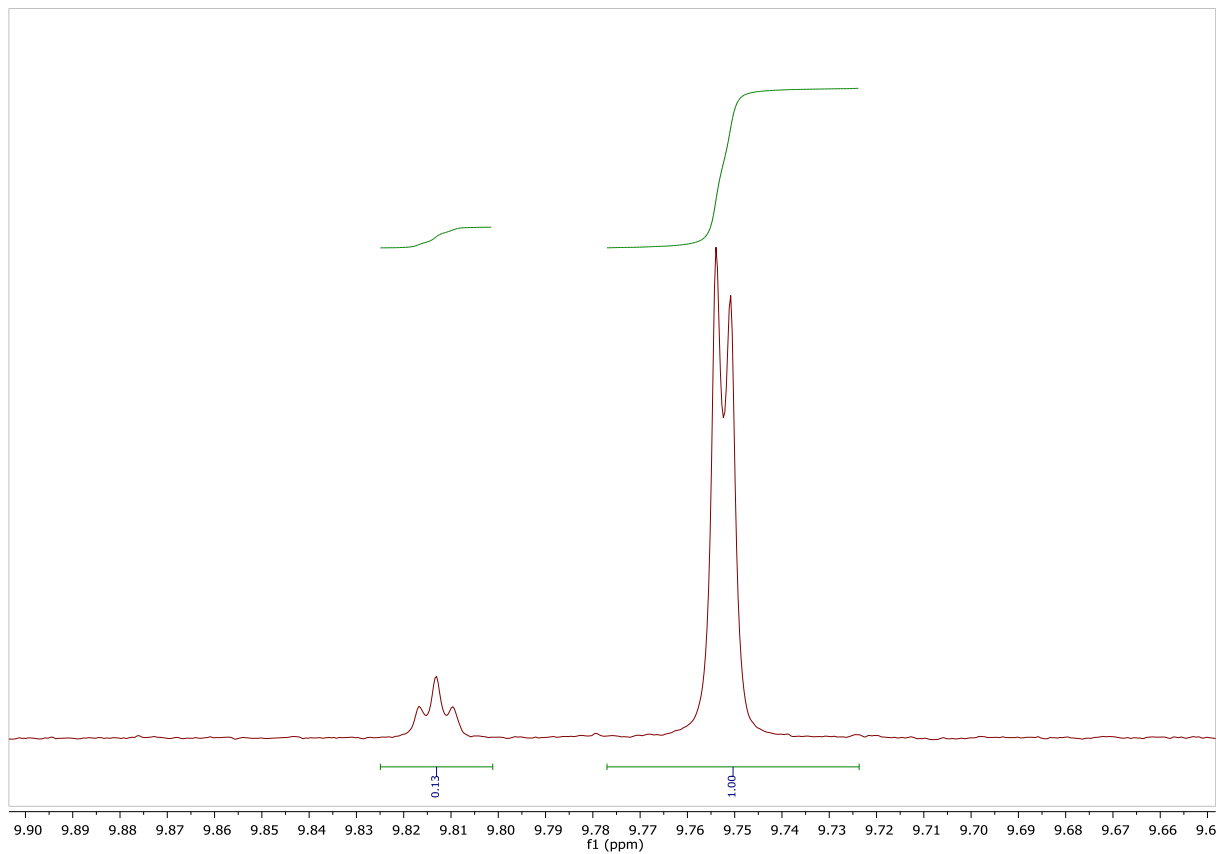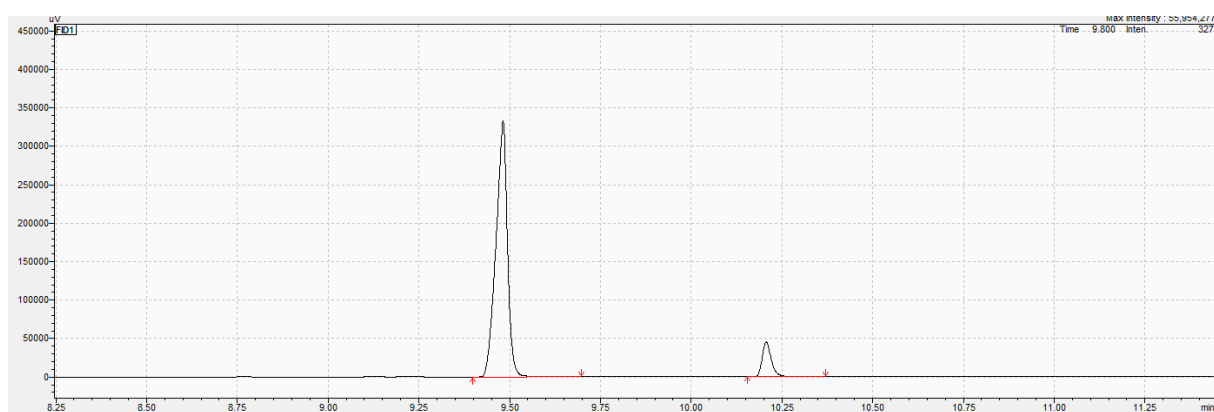

| Retention time | Area   |          | I/b ratio |
|----------------|--------|----------|-----------|
| 9.482          | 727369 | Branched | 0.11      |
| 10.207         | 79417  | Linear   |           |

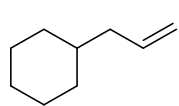

$\text{Rh}/\text{P}_m\text{Py}_3/\text{ZnTPP}_m\text{CF}_3$   
 0,1 mol%  
 20 bar  $\text{H}_2:\text{CO}$   
 48 hrs, 25°C  
 Toluene

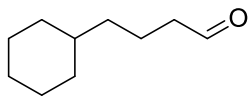

linear

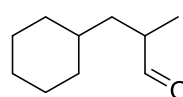

branched

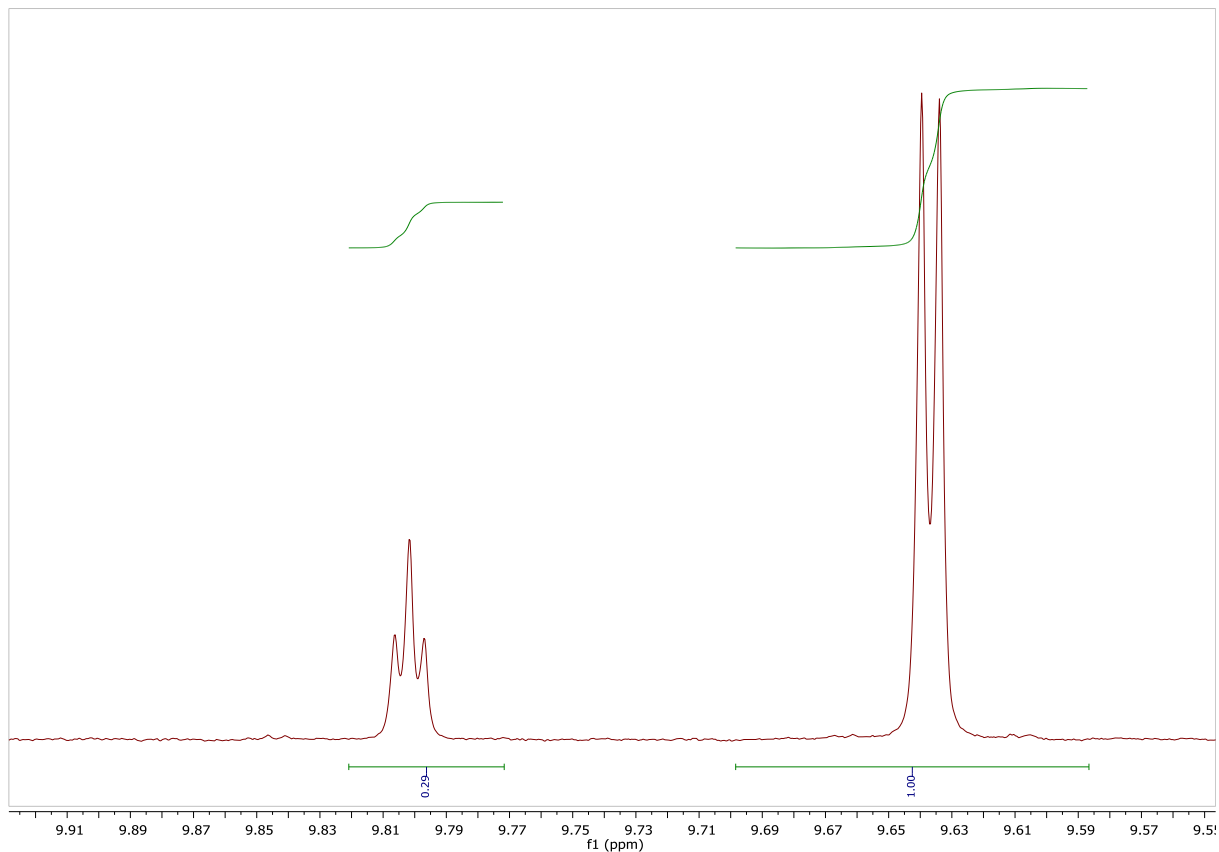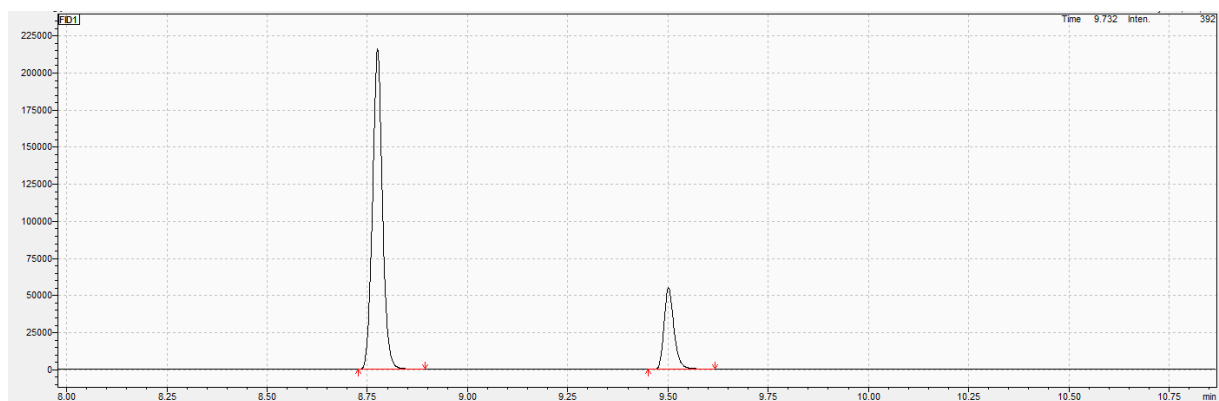

| Retention time | Area   |          | I/b ratio |
|----------------|--------|----------|-----------|
| 8.776          | 371792 | Branched | 0.25      |
| 9.501          | 94446  | Linear   |           |



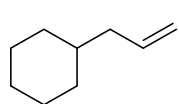

Rh/P<sub>m</sub>Py<sub>3</sub>/ZnTPP<sub>m</sub>O<sub>i</sub>Pr  
 0,1 mol%  
 20 bar H<sub>2</sub>:CO  
 48 hrs, 25°C  
 Toluene

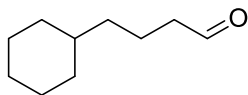

linear

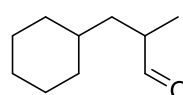

branched

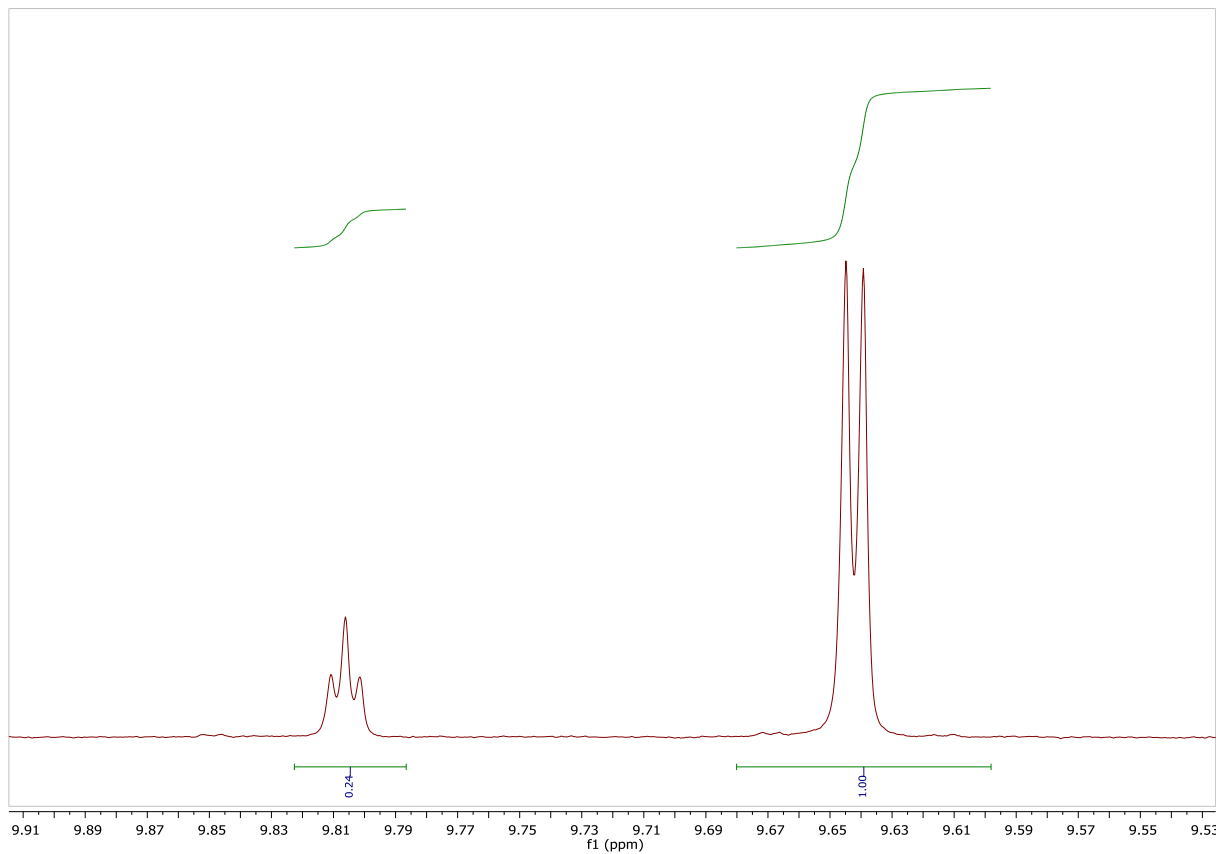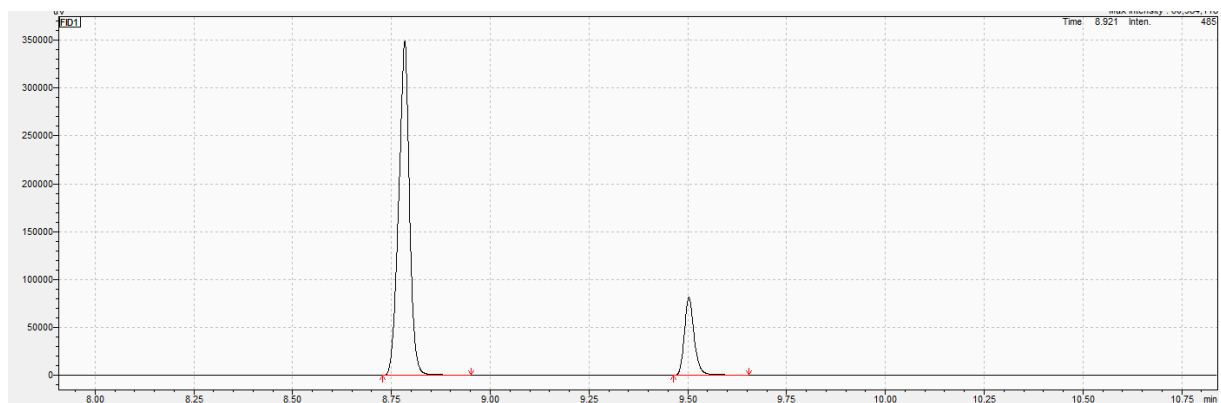

| Retention time | Area   |          | I/b ratio |
|----------------|--------|----------|-----------|
| 8.784          | 659584 | Branched | 0.21      |
| 9.503          | 138535 | Linear   |           |

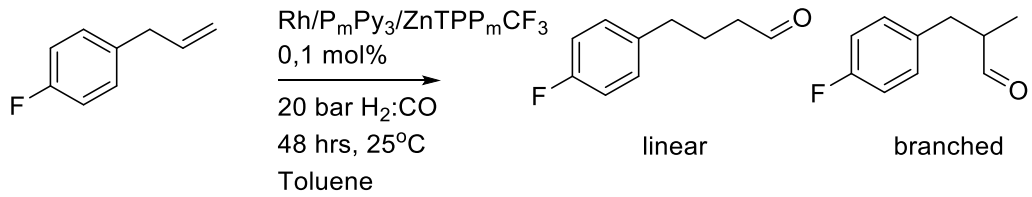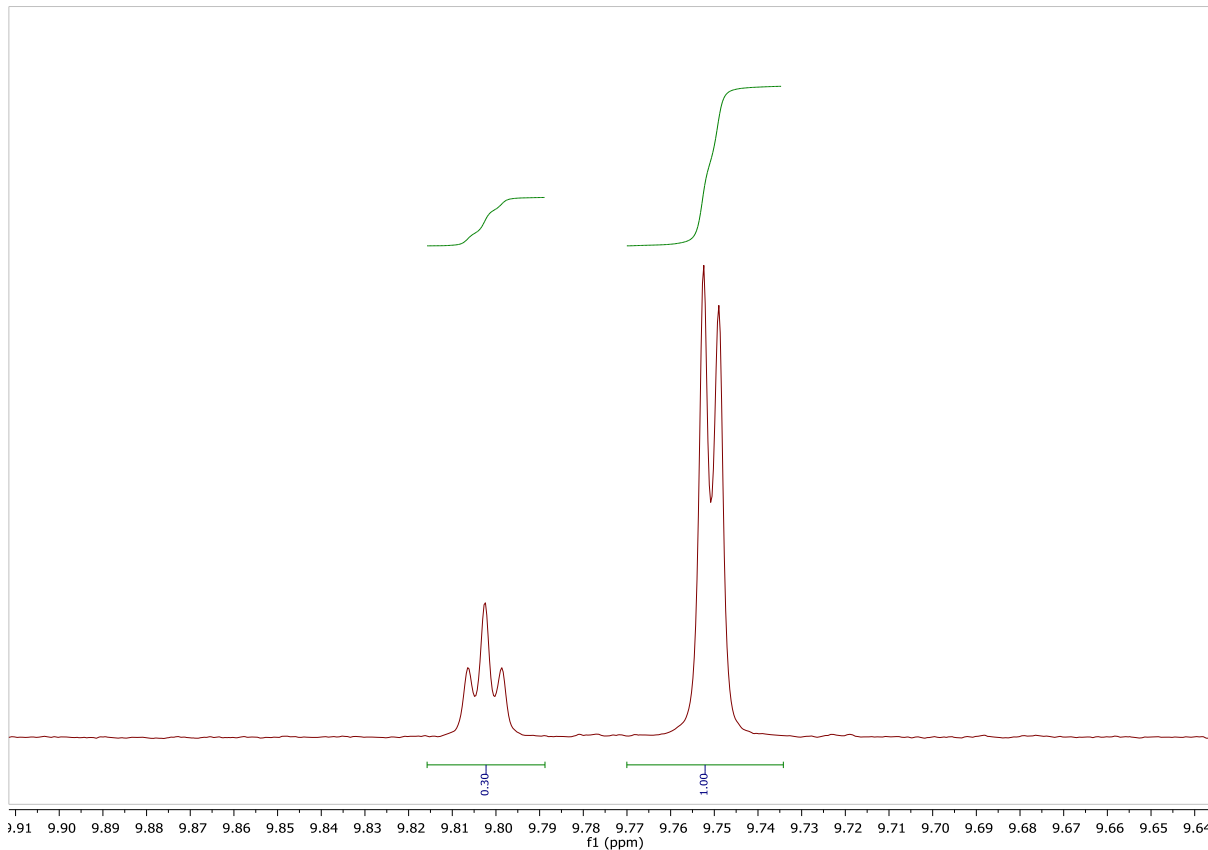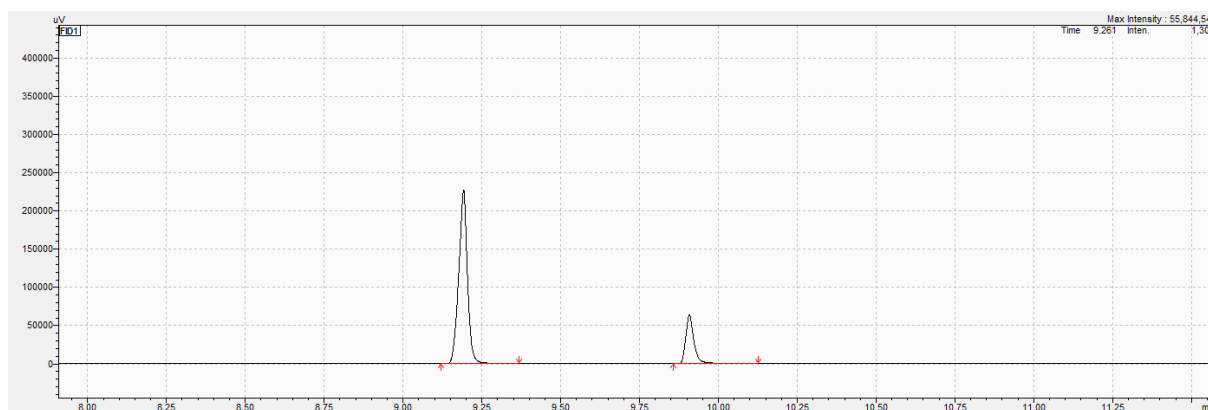

| Retention time | Area   |          | l/b ratio |
|----------------|--------|----------|-----------|
| 9.192          | 435578 | Branched | 0.26      |
| 9.908          | 113801 | Linear   |           |

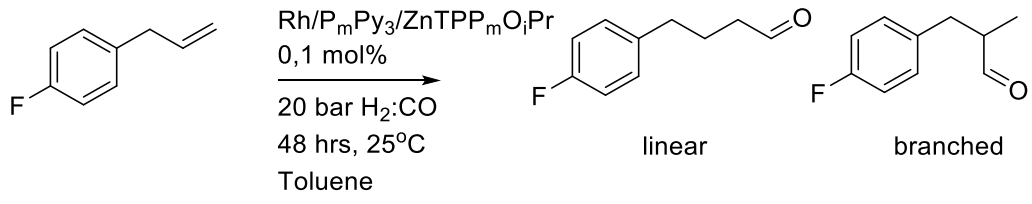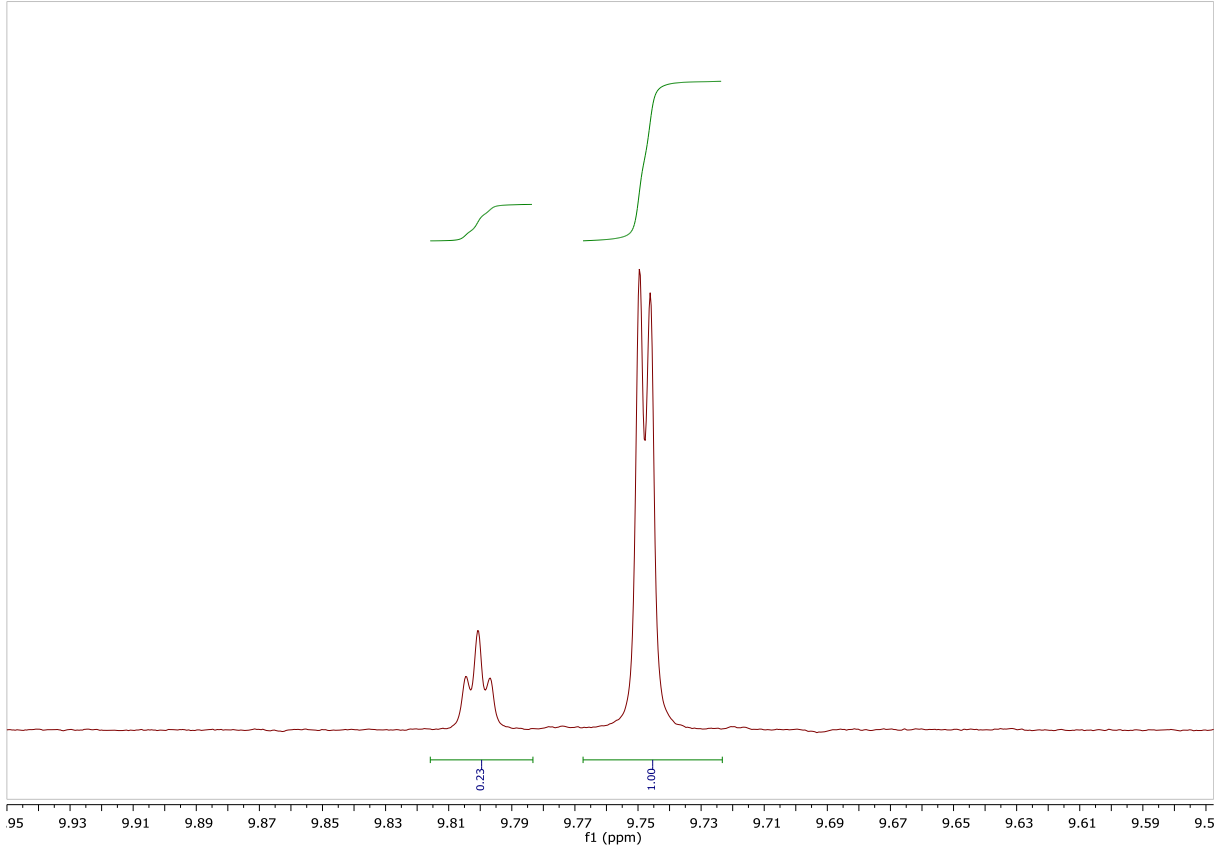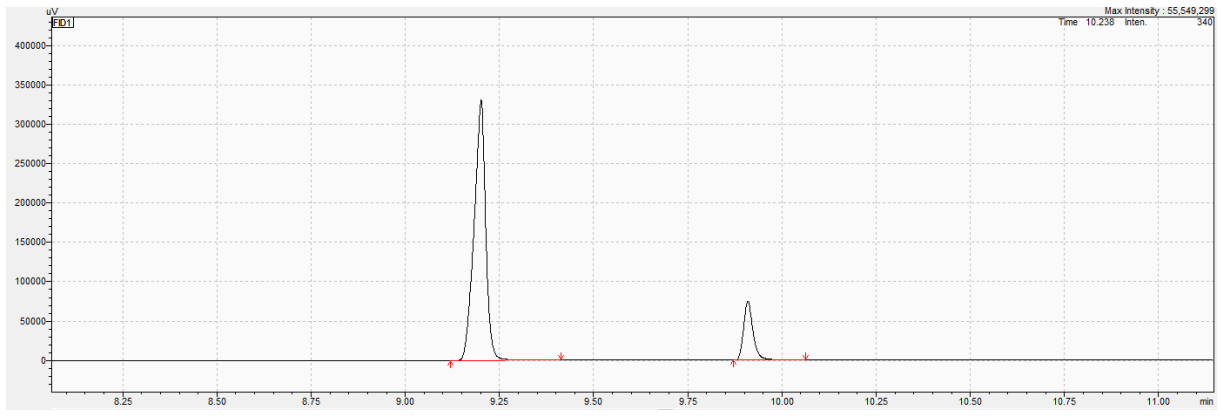

| Retention time | Area   |          | I/b ratio |
|----------------|--------|----------|-----------|
| 9.201          | 701901 | Branched | 0.18      |
| 9.910          | 131047 | Linear   |           |

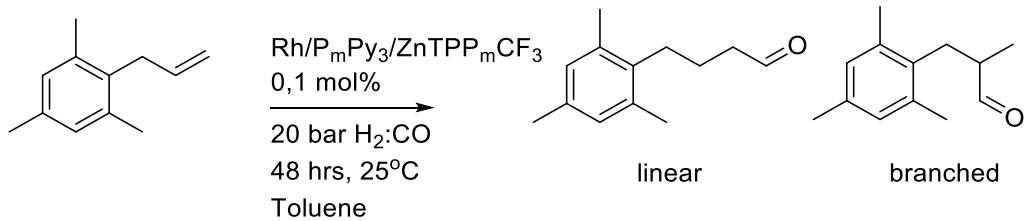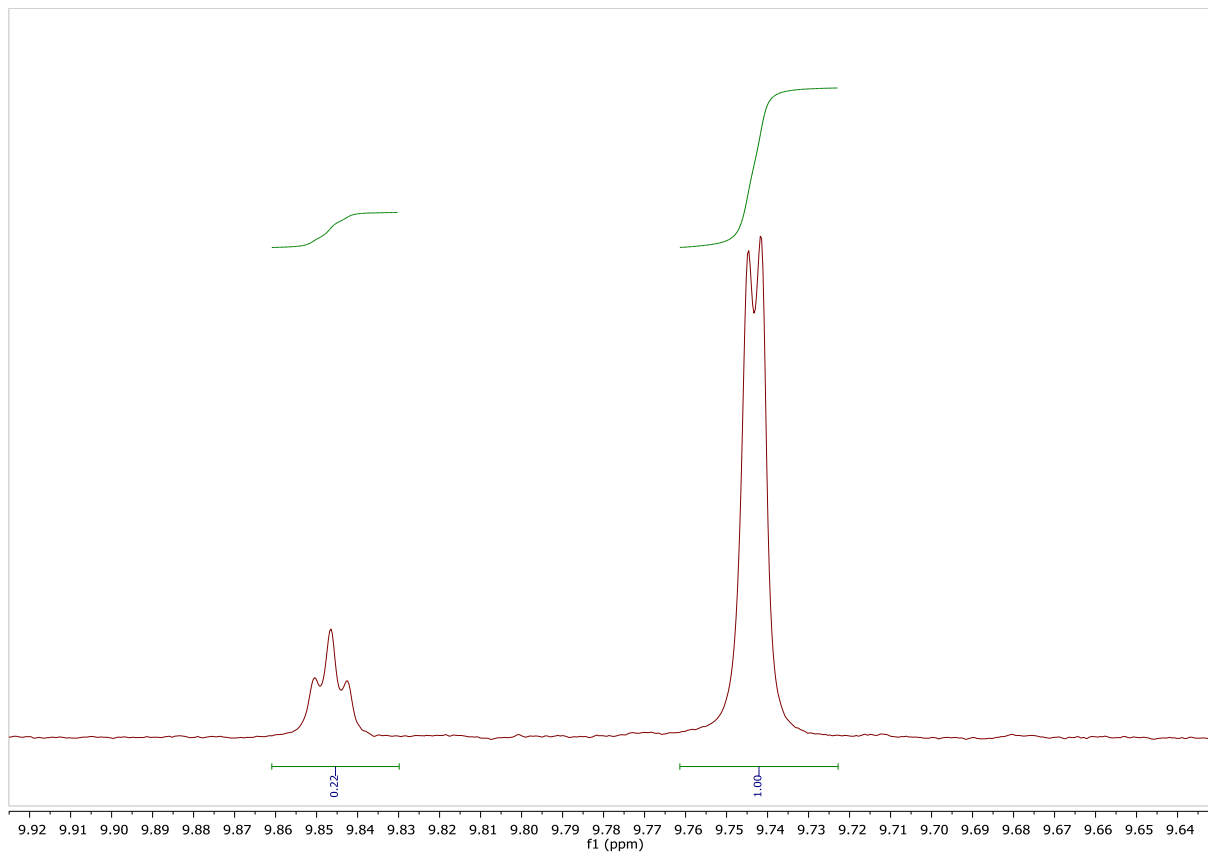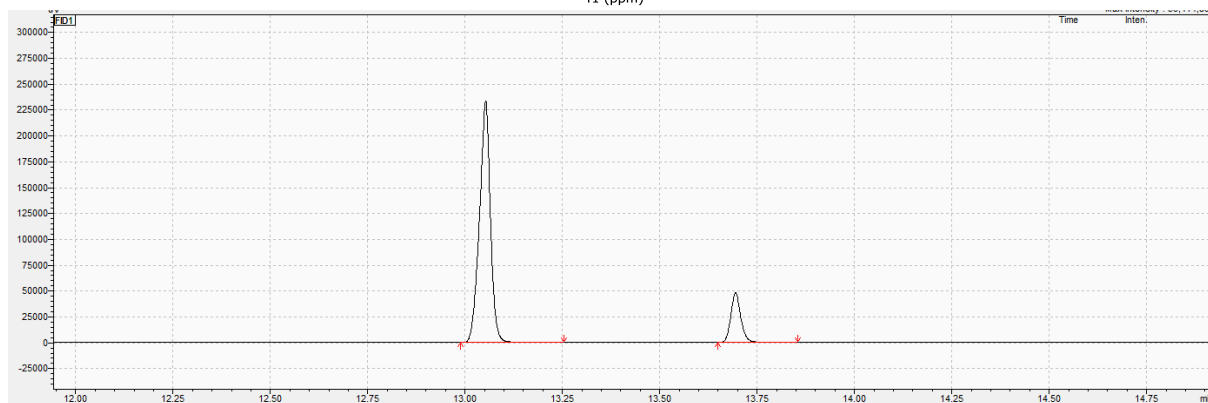

| Retention time | Area   |          | I/b ratio |
|----------------|--------|----------|-----------|
| 13.053         | 455483 | Branched | 0.19      |
| 13.695         | 86167  | Linear   |           |

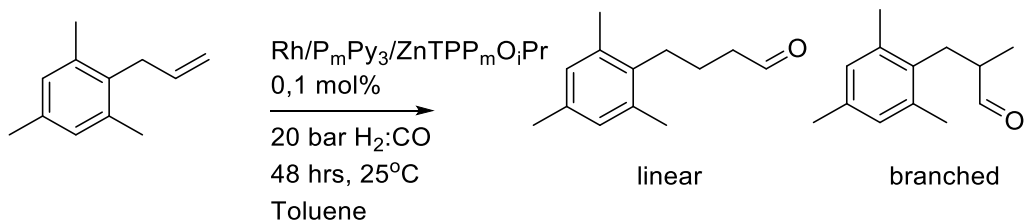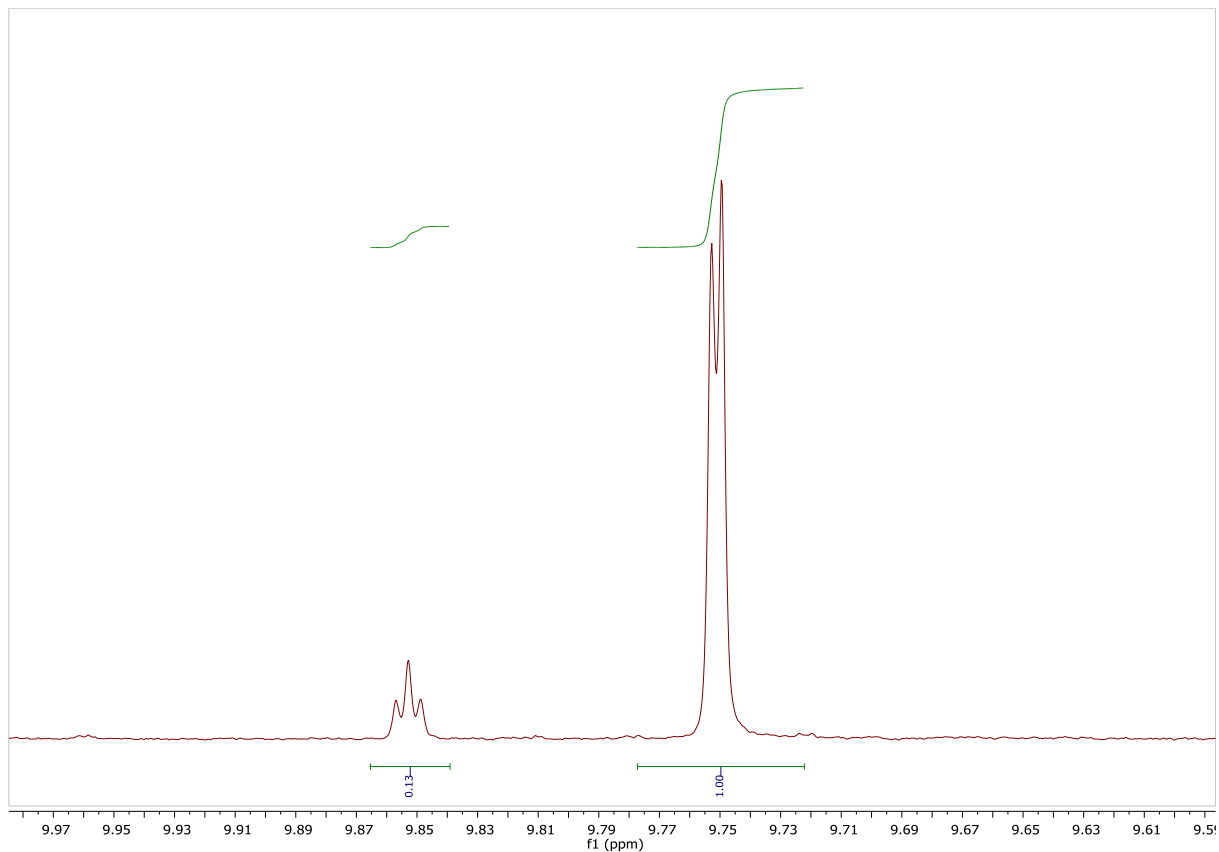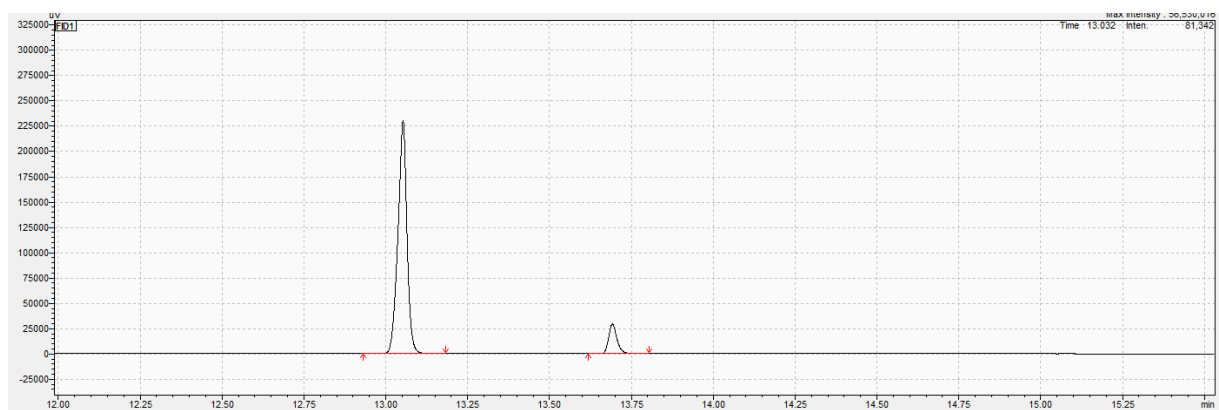

| Retention time | Area   |          | l/b ratio |
|----------------|--------|----------|-----------|
| 13.052         | 443075 | Branched | 0.11      |
| 13.692         | 50236  | Linear   |           |

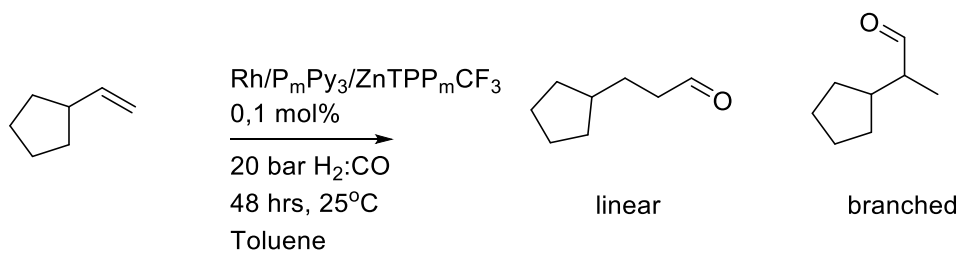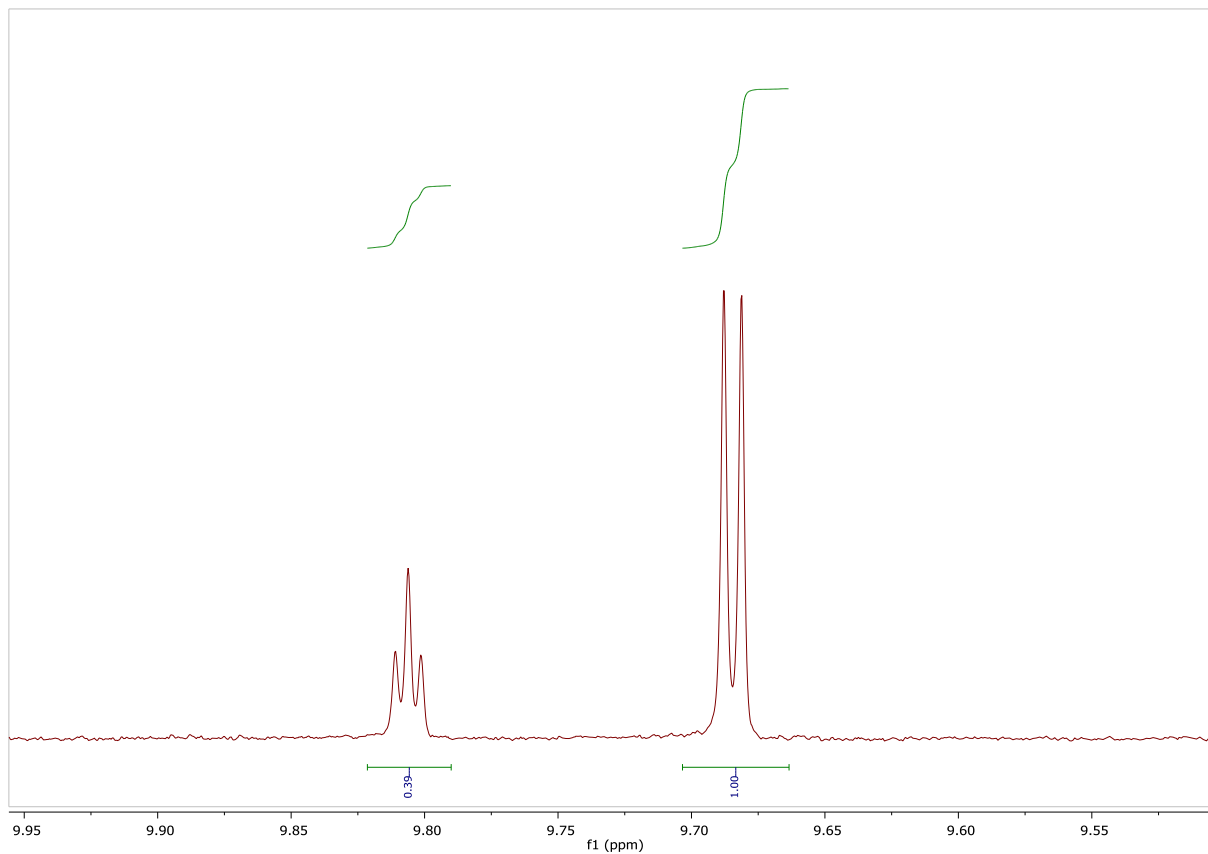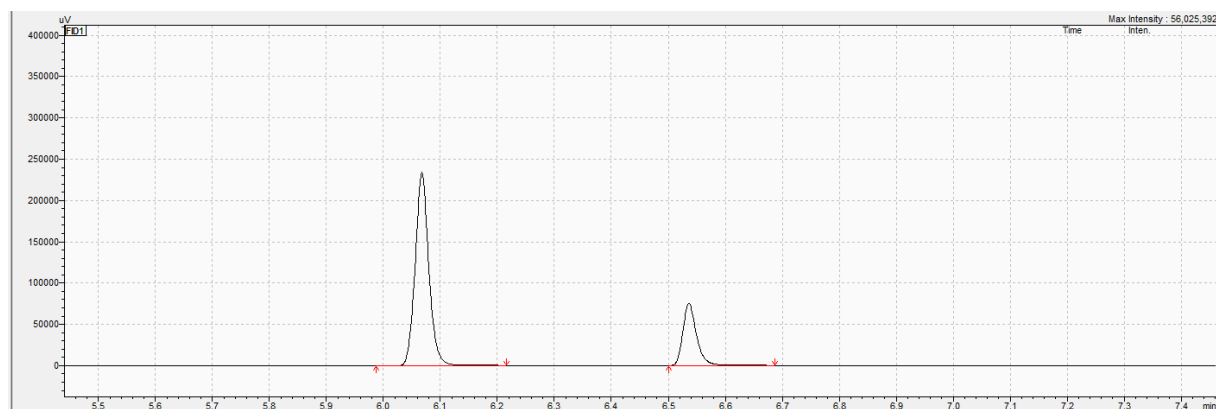

| Retention time | Area   |          | I/b ratio |
|----------------|--------|----------|-----------|
| 6.068          | 386748 | Branched | 0.32      |
| 6.536          | 124379 | Linear   |           |

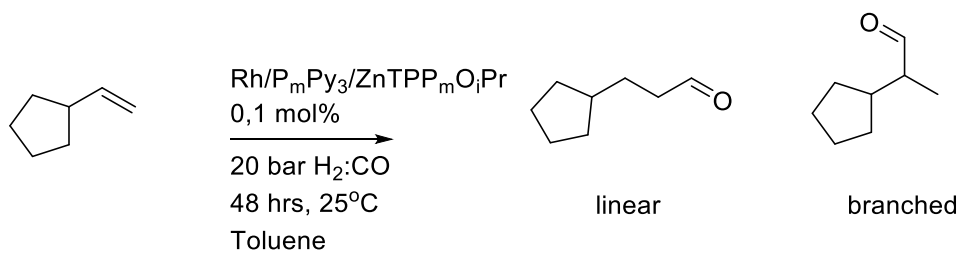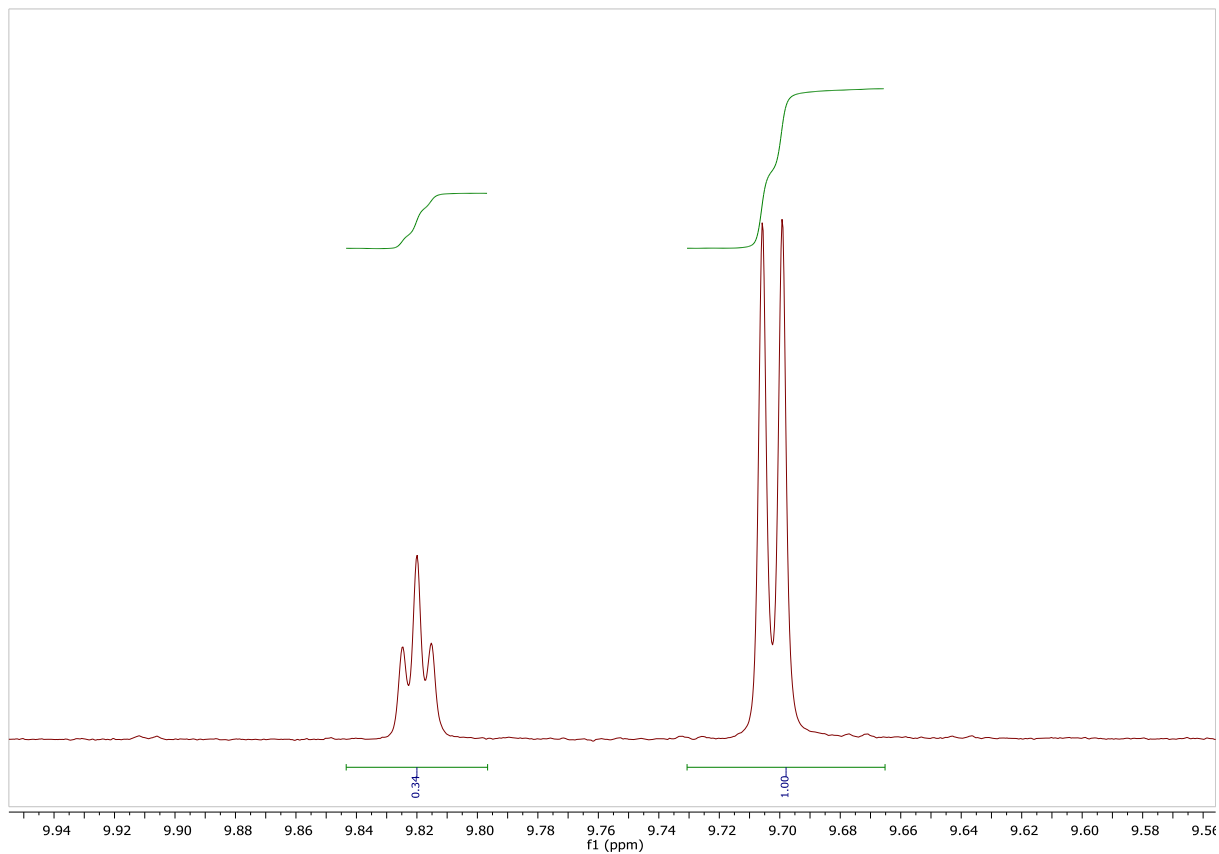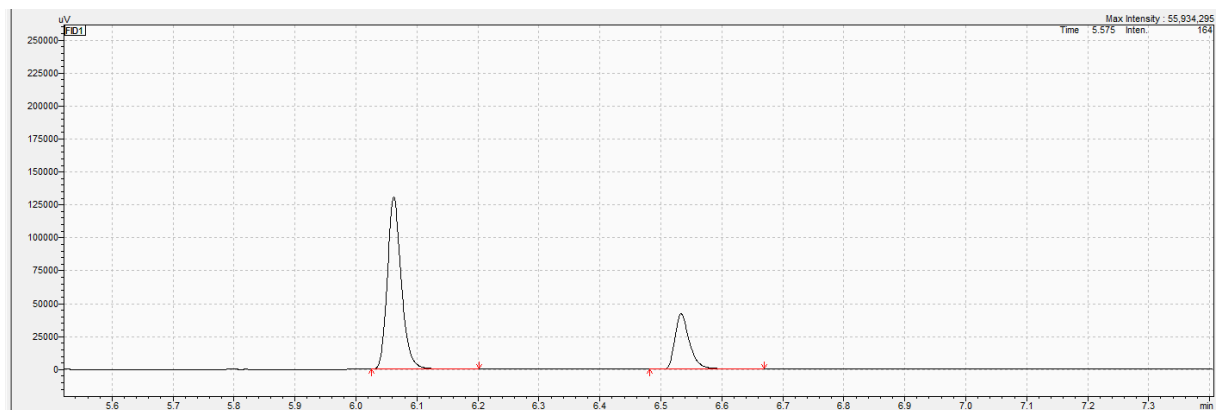

| Retention time | Area   |          | I/b ratio |
|----------------|--------|----------|-----------|
| 6.062          | 208145 | Branched | 0.33      |
| 6.533          | 69799  | Linear   |           |

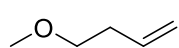

Rh/P<sub>m</sub>Py<sub>3</sub>/ZnTPP<sub>m</sub>CF<sub>3</sub>

0,1 mol%

20 bar H<sub>2</sub>:CO

48 hrs, 25°C

Toluene

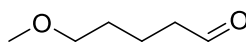

linear

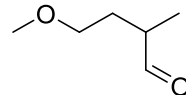

branched

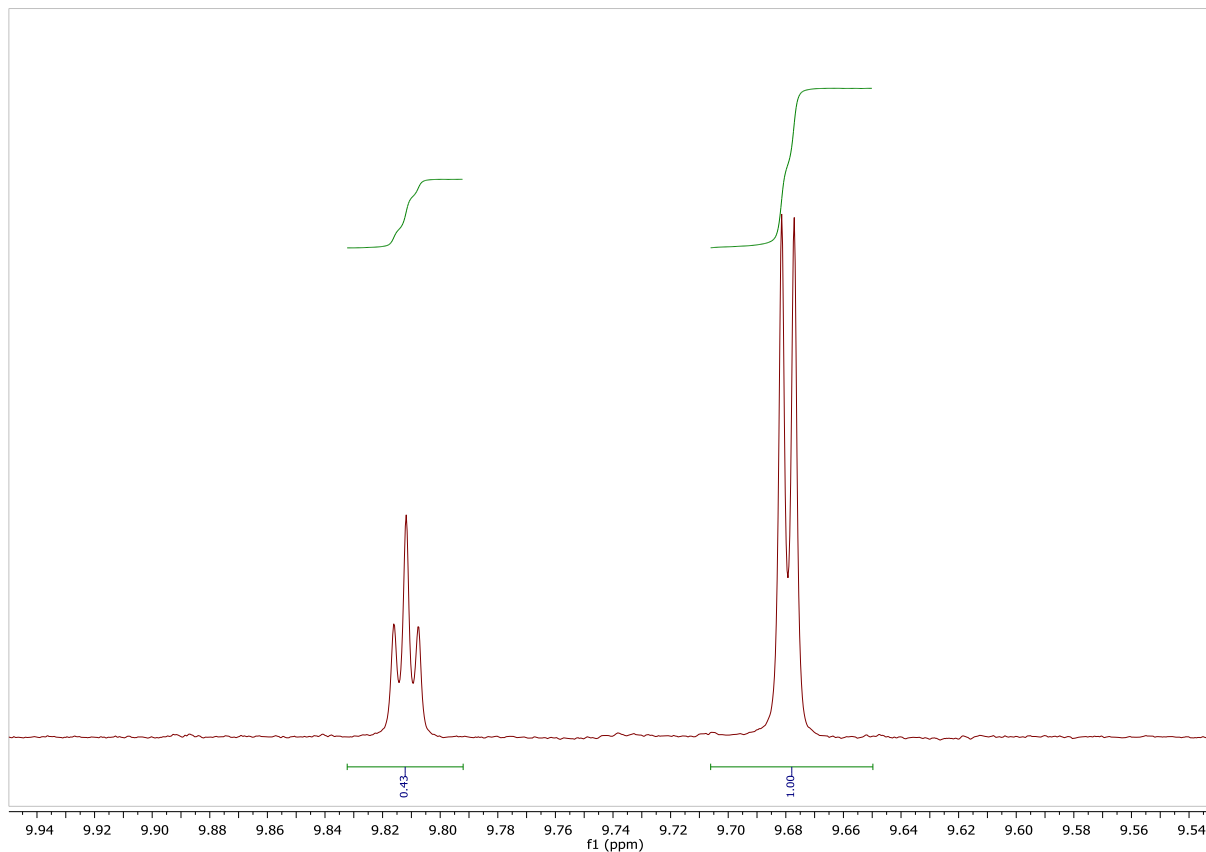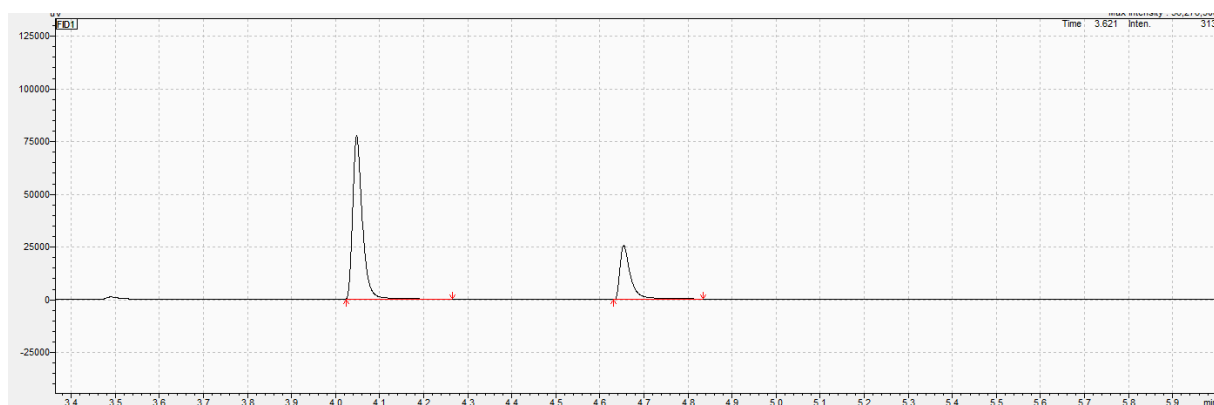

| Retention time | Area   |          | I/b ratio |
|----------------|--------|----------|-----------|
| 4.048          | 118624 | Branched | 0.35      |
| 4.654          | 42487  | Linear   |           |



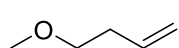

Rh/P<sub>m</sub>Py<sub>3</sub>/ZnTPP<sub>m</sub>O<sub>i</sub>Pr  
 0,1 mol%  
 20 bar H<sub>2</sub>:CO  
 48 hrs, 25°C  
 Toluene

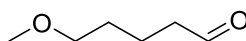

linear

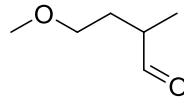

branched

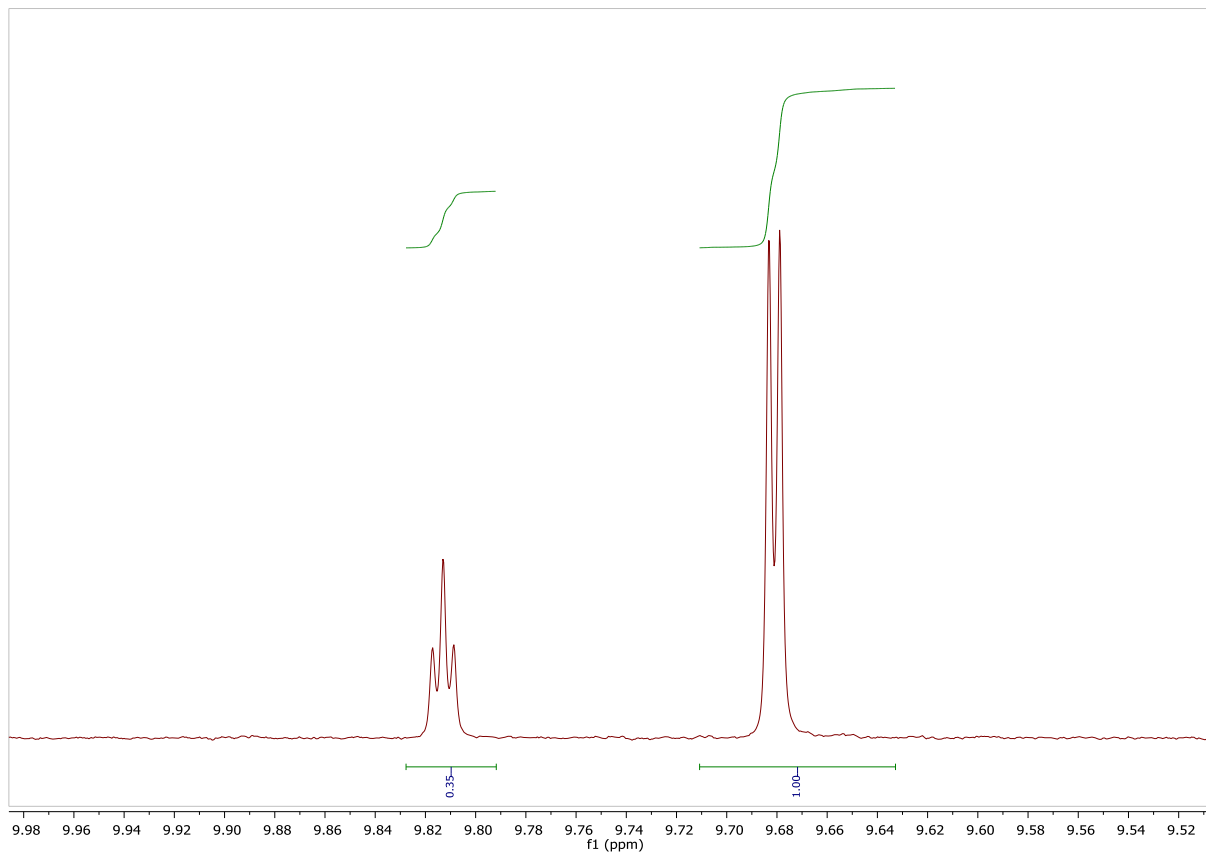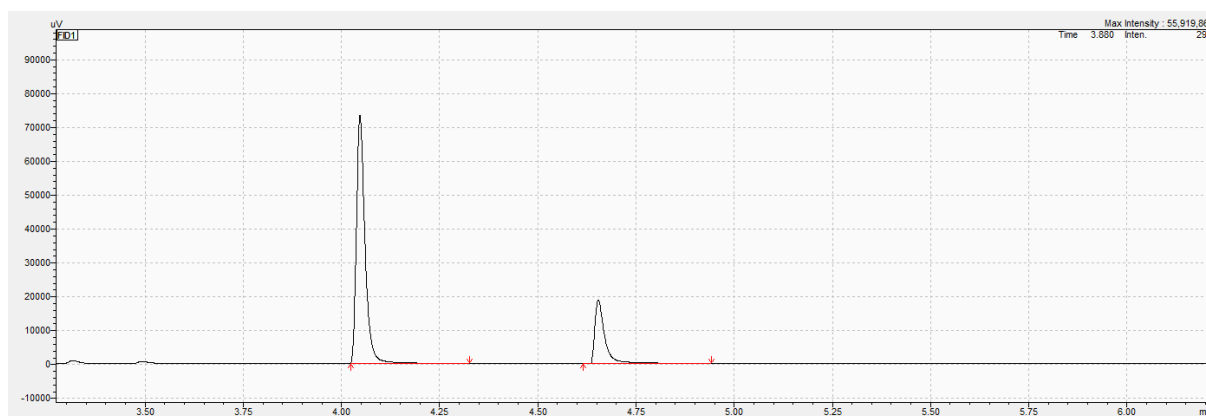

| Retention time | Area   |          | l/b ratio |
|----------------|--------|----------|-----------|
| 4.047          | 112187 | Branched | 0.29      |
| 4.654          | 33000  | Linear   |           |

## DFT calculations

All DFT calculations were performed with the Amsterdam Density Functional<sup>1,2</sup> (ADF) program. The BLYP-D3BJ<sup>3,4</sup> functional was used together with a small core and a DZP basis set for all atoms apart from rhodium, for which a TZP basis set was used. Relativistic effects were accounted for by running calculations with zeroth-order regular approximation (ZORA).<sup>5-7</sup>

### XYZ coordinates:

#### CAT1

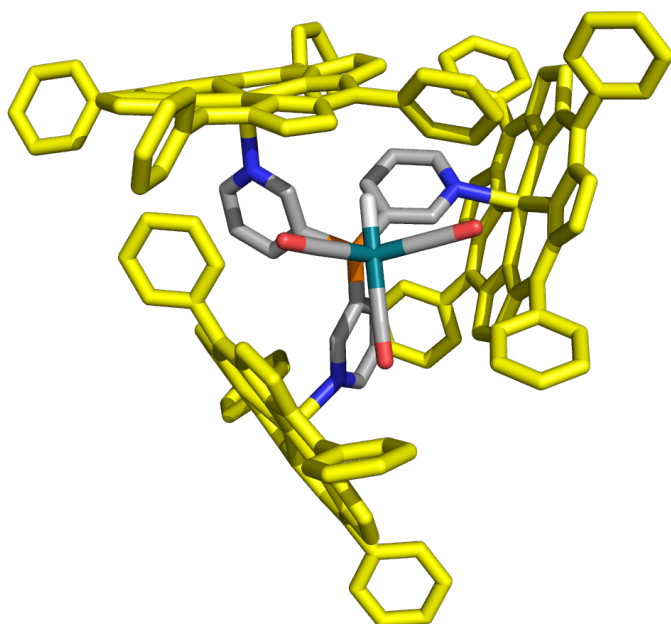

Energy: -41002.68 kcal/mol

|    |             |             |             |
|----|-------------|-------------|-------------|
| Rh | -0.28099407 | -0.41538670 | 2.83657412  |
| C  | 0.44467885  | -1.97193646 | 3.84378523  |
| C  | -2.19349210 | -0.99865171 | 2.80829011  |
| P  | 0.05230499  | -0.43235954 | 0.46833882  |
| O  | -3.27835521 | -1.37640478 | 2.71888701  |
| O  | 0.87048277  | -2.85873977 | 4.44603488  |
| H  | 7.77477252  | -6.01957431 | 1.84452678  |
| H  | 8.08346663  | -5.63151079 | -0.80133166 |
| C  | 1.51969977  | -1.36401037 | -0.16764564 |
| C  | 2.49746875  | -0.79372420 | -1.00028903 |
| C  | 1.71905794  | -2.68095990 | 0.26922031  |
| C  | 3.64674338  | -1.52253847 | -1.29965084 |
| N  | 2.82285364  | -3.38193043 | -0.03294056 |

|   |             |             |             |
|---|-------------|-------------|-------------|
| C | 3.78673221  | -2.80035846 | -0.77440609 |
| C | 0.42598730  | 1.20611118  | -0.28452337 |
| C | -0.13021376 | 1.69172001  | -1.47401432 |
| C | 1.45068904  | 1.94683428  | 0.31848939  |
| C | 0.38189201  | 2.87129757  | -2.01973911 |
| N | 1.96618970  | 3.05317663  | -0.23242907 |
| C | 1.44431687  | 3.51111328  | -1.38822180 |
| C | -1.32375076 | -1.05109091 | -0.58503302 |
| C | -1.18116037 | -1.97858067 | -1.62616960 |
| C | -2.60998668 | -0.57376798 | -0.30054569 |
| C | -2.32041860 | -2.39530825 | -2.31762026 |
| N | -3.70158311 | -0.97935838 | -0.96343205 |
| C | -3.56215745 | -1.88688835 | -1.95257347 |
| H | 1.26983219  | 0.02056209  | 2.81288911  |
| H | -2.41929673 | -5.52757317 | 0.72704355  |
| H | -2.12475418 | -5.16868700 | -1.90134660 |
| H | 1.89479644  | 1.62706998  | 1.25920102  |
| H | 1.90468433  | 4.40641219  | -1.80030702 |
| H | -0.02700802 | 3.27539469  | -2.94252613 |
| H | -0.94254012 | 1.16702407  | -1.97248000 |
| H | -0.20553992 | -2.37748263 | -1.88830073 |
| H | -2.24714250 | -3.10696568 | -3.13224189 |
| H | -4.47627641 | -2.19014585 | -2.45769682 |
| H | -2.77947956 | 0.17333004  | 0.47077982  |
| H | 0.98125735  | -3.18993208 | 0.88773833  |
| H | 2.38999132  | 0.21573715  | -1.38497745 |
| H | 4.43344876  | -1.09339678 | -1.90983388 |
| H | 4.68230248  | -3.39101537 | -0.94110155 |
| N | 3.53213125  | 3.28300702  | 2.63593643  |
| N | 4.84843213  | 1.99654080  | 0.38118357  |
| N | 4.56673076  | 4.45494846  | -1.20981730 |

|   |            |             |             |
|---|------------|-------------|-------------|
| N | 3.25741007 | 5.75022767  | 1.06609558  |
| C | 2.92495625 | 1.95504364  | 4.42607757  |
| C | 3.64499616 | 2.00952459  | 3.16471906  |
| C | 2.42147871 | 3.20520644  | 4.65899489  |
| C | 2.81088332 | 4.04106970  | 3.53853201  |
| C | 4.34481472 | 0.93723976  | 2.56828949  |
| C | 4.98283667 | 0.98504945  | 1.30781656  |
| C | 5.84411599 | -0.04936629 | 0.76092139  |
| C | 6.18321600 | 0.33740012  | -0.50797552 |
| C | 5.53505741 | 1.61320081  | -0.75262833 |
| C | 4.35928029 | -0.37112629 | 3.27961617  |
| C | 4.25320438 | -2.86321402 | 4.58055021  |
| C | 4.86507960 | -0.51486503 | 4.58176055  |
| C | 3.82812659 | -1.50191907 | 2.63572556  |
| C | 3.77299501 | -2.73808742 | 3.27448649  |
| C | 4.80938247 | -1.75419143 | 5.22595143  |
| C | 5.55889506 | 2.31728100  | -1.97220230 |
| C | 5.07923004 | 3.62318635  | -2.18420238 |
| C | 5.04806641 | 4.30918080  | -3.46291629 |
| C | 4.51348305 | 5.55132465  | -3.24064449 |
| C | 4.21818448 | 5.64206736  | -1.81983890 |
| C | 3.63334470 | 6.75087835  | -1.17235348 |
| C | 6.12275493 | 1.57966754  | -3.14725894 |
| C | 7.17645594 | 0.10682608  | -5.29793425 |
| C | 7.44791714 | 1.77446764  | -3.55847313 |
| C | 5.32796937 | 0.64794077  | -3.83259473 |
| C | 5.85032040 | -0.08947847 | -4.89857664 |
| C | 7.97235528 | 1.04188190  | -4.62846322 |
| C | 3.33162460 | 7.95087808  | -2.00662117 |
| C | 2.72933872 | 10.19173067 | -3.59475698 |
| C | 4.36050355 | 8.72965570  | -2.55700851 |

|    |             |             |             |
|----|-------------|-------------|-------------|
| C  | 1.99664054  | 8.30938324  | -2.25702915 |
| C  | 1.69699963  | 9.42121410  | -3.04837699 |
| C  | 4.06146574  | 9.84396076  | -3.34580857 |
| C  | 3.26525632  | 6.81237052  | 0.18800540  |
| C  | 2.79623150  | 8.00189348  | 0.87801830  |
| C  | 2.48937225  | 7.62974346  | 2.16006141  |
| C  | 2.76002362  | 6.20646684  | 2.26824725  |
| C  | 2.48838918  | 5.40647872  | 3.39596530  |
| C  | 1.77022776  | 6.05656658  | 4.53382856  |
| C  | 0.42229254  | 7.26766912  | 6.68212656  |
| C  | 2.42858837  | 6.27736538  | 5.75310731  |
| C  | 0.42894865  | 6.44818163  | 4.40071992  |
| C  | -0.24119409 | 7.04804891  | 5.47035957  |
| C  | 1.75973844  | 6.88135583  | 6.82089220  |
| Zn | 3.85021607  | 3.81473375  | 0.64091830  |
| H  | 5.30376752  | 0.34828231  | 5.08086833  |
| H  | 3.43783218  | -1.38473663 | 1.63296133  |
| H  | 3.34225195  | -3.59385685 | 2.76302128  |
| H  | 5.20562729  | -1.85624825 | 6.23635597  |
| H  | 4.20153682  | -3.82209448 | 5.08852931  |
| H  | 8.06521236  | 2.49765750  | -3.02638686 |
| H  | 4.29083201  | 0.51405458  | -3.52864497 |
| H  | 5.22461342  | -0.81567774 | -5.41738187 |
| H  | 9.00574964  | 1.19974641  | -4.93721279 |
| H  | 7.58514310  | -0.46329096 | -6.13172729 |
| H  | 5.39570374  | 8.45674282  | -2.35479032 |
| H  | 1.19722534  | 7.70367761  | -1.83194733 |
| H  | 0.65724170  | 9.68524165  | -3.24191584 |
| H  | 4.86943354  | 10.44475337 | -3.76323525 |
| H  | 2.49671838  | 11.05992220 | -4.21094272 |
| H  | 3.47060196  | 5.97525612  | 5.85263566  |

|   |             |             |             |
|---|-------------|-------------|-------------|
| H | -0.09146202 | 6.27084804  | 3.46207427  |
| H | -1.28502068 | 7.34088829  | 5.35702962  |
| H | 2.28406731  | 7.05342855  | 7.76080186  |
| H | -0.10061180 | 7.73755509  | 7.51490851  |
| H | 2.11931467  | 8.25589134  | 2.96294386  |
| H | 2.72644015  | 8.99013398  | 0.43929280  |
| H | 6.82218146  | -0.18359544 | -1.21186485 |
| H | 6.15126427  | -0.94642675 | 1.28396924  |
| H | 2.79879444  | 1.07108961  | 5.03773739  |
| H | 1.81281472  | 3.52775988  | 5.49444536  |
| H | 5.38774587  | 3.89004270  | -4.40324663 |
| H | 4.33032480  | 6.33260500  | -3.96867037 |
| N | -4.92234581 | 1.38863784  | 0.92391197  |
| N | -4.50095181 | 1.71354830  | -1.94675373 |
| N | -6.38870887 | -0.49583449 | -2.47432083 |
| N | -6.78777062 | -0.82484245 | 0.40642308  |
| C | -3.77805499 | 2.79558171  | 2.35146897  |
| C | -4.02464893 | 2.44093806  | 0.96414316  |
| C | -4.50848823 | 1.93754955  | 3.12681703  |
| C | -5.24436260 | 1.06722461  | 2.22968107  |
| C | -3.41362027 | 3.05155179  | -0.15523081 |
| C | -3.64216291 | 2.69898235  | -1.50648500 |
| C | -2.90793871 | 3.22675258  | -2.64654873 |
| C | -3.30444452 | 2.52132495  | -3.74976467 |
| C | -4.29861417 | 1.56220261  | -3.30412829 |
| C | -2.38019639 | 4.09490336  | 0.11163430  |
| C | -0.35488361 | 6.00528221  | 0.56220990  |
| C | -2.47799745 | 5.38496467  | -0.43813824 |
| C | -1.26355486 | 3.79209469  | 0.90822740  |
| C | -0.26571132 | 4.73566681  | 1.14000053  |
| C | -1.46814193 | 6.32713778  | -0.22185317 |

|    |              |             |             |
|----|--------------|-------------|-------------|
| C  | -4.90937155  | 0.60289085  | -4.13193245 |
| C  | -5.88697091  | -0.33325601 | -3.74973202 |
| C  | -6.45540473  | -1.34492905 | -4.62167945 |
| C  | -7.29360457  | -2.11094028 | -3.85529705 |
| C  | -7.23735522  | -1.58299931 | -2.50256605 |
| C  | -7.87379956  | -2.15818105 | -1.38313625 |
| C  | -4.41447074  | 0.51417205  | -5.54263694 |
| C  | -3.47136622  | 0.29677884  | -8.17947558 |
| C  | -5.10804412  | 1.12514885  | -6.59524922 |
| C  | -3.24414252  | -0.20873916 | -5.82011543 |
| C  | -2.77496836  | -0.31596560 | -7.13177984 |
| C  | -4.63924764  | 1.01736579  | -7.90848549 |
| C  | -8.79078473  | -3.30738235 | -1.64354540 |
| C  | -10.49569997 | -5.48226585 | -2.16345446 |
| C  | -9.99530943  | -3.11746766 | -2.33829607 |
| C  | -8.45126345  | -4.59861475 | -1.20977926 |
| C  | -9.29721139  | -5.67986414 | -1.46899160 |
| C  | -10.84320561 | -4.19796264 | -2.59605764 |
| C  | -7.68404789  | -1.77408110 | -0.04145908 |
| C  | -8.39185669  | -2.33542793 | 1.09659260  |
| C  | -7.89738662  | -1.72770198 | 2.21796448  |
| C  | -6.88240598  | -0.78325126 | 1.78057785  |
| C  | -6.13632655  | 0.05347248  | 2.63449440  |
| C  | -6.30106293  | -0.17015274 | 4.10229678  |
| C  | -6.58900517  | -0.61348290 | 6.86569949  |
| C  | -6.89511133  | 0.80179053  | 4.92172296  |
| C  | -5.86372806  | -1.37227169 | 4.68256025  |
| C  | -6.00360771  | -1.59162229 | 6.05443075  |
| C  | -7.03781854  | 0.58227917  | 6.29430433  |
| Zn | -5.50664287  | 0.30412733  | -0.76050097 |
| H  | -3.35289089  | 5.64280786  | -1.03372126 |

|   |              |             |             |
|---|--------------|-------------|-------------|
| H | -1.17546339  | 2.79772906  | 1.33020580  |
| H | 0.59184676   | 4.47384899  | 1.75205034  |
| H | -1.55782996  | 7.32256510  | -0.65765535 |
| H | 0.43076183   | 6.73731271  | 0.72825271  |
| H | -6.01764571  | 1.68339110  | -6.37536044 |
| H | -2.71470176  | -0.69215126 | -5.00051185 |
| H | -1.86759452  | -0.87937705 | -7.34403414 |
| H | -5.18579370  | 1.49656487  | -8.72072053 |
| H | -3.10532633  | 0.21206090  | -9.20249742 |
| H | -10.26121846 | -2.11459304 | -2.67066053 |
| H | -7.51528261  | -4.74701106 | -0.67219331 |
| H | -9.01927597  | -6.67835789 | -1.13151465 |
| H | -11.77820966 | -4.03677175 | -3.13254618 |
| H | -11.15588381 | -6.32539258 | -2.36581400 |
| H | -7.25023945  | 1.72807465  | 4.47156844  |
| H | -5.41471343  | -2.13132694 | 4.04672907  |
| H | -5.65248005  | -2.52585131 | 6.49223575  |
| H | -7.50551559  | 1.34397597  | 6.91811513  |
| H | -6.69814003  | -0.78378304 | 7.93652573  |
| H | -8.20429597  | -1.88242986 | 3.24504309  |
| H | -9.17769028  | -3.07849436 | 1.03702065  |
| H | -2.96513197  | 2.63772450  | -4.77251579 |
| H | -2.17905491  | 4.02312466  | -2.60283509 |
| H | -3.13230041  | 3.59398941  | 2.69155361  |
| H | -4.54519779  | 1.90125335  | 4.20831157  |
| H | -6.23235060  | -1.45649187 | -5.67625969 |
| H | -7.87572437  | -2.97030752 | -4.16611817 |
| N | 4.88750911   | -5.87487528 | 0.16240613  |
| N | 2.58717439   | -6.05797045 | 1.98094751  |
| N | 0.76280982   | -5.66454019 | -0.29183248 |
| N | 3.06748892   | -5.55286352 | -2.10579886 |



|   |             |             |             |
|---|-------------|-------------|-------------|
| C | 6.99888477  | -5.92855574 | 1.09474338  |
| C | 5.57087290  | -5.99261949 | 1.35525866  |
| C | 7.15651803  | -5.73964607 | -0.25133529 |
| C | 5.82835107  | -5.71664762 | -0.83694357 |
| C | 4.98654874  | -6.12625317 | 2.63086138  |
| C | 3.60454355  | -6.16314318 | 2.91091441  |
| C | 3.02670729  | -6.17739467 | 4.24269446  |
| C | 1.67251124  | -6.05530680 | 4.09970727  |
| C | 1.39527391  | -5.98705595 | 2.67673696  |
| C | 5.91541099  | -6.15670272 | 3.80082383  |
| C | 7.63216997  | -6.17618604 | 6.02732911  |
| C | 6.03390668  | -7.30584371 | 4.59761582  |
| C | 6.67152041  | -5.01967742 | 4.12810832  |
| C | 7.52221697  | -5.02820995 | 5.23518288  |
| C | 6.88741339  | -7.31595783 | 5.70422830  |
| C | 0.11597435  | -5.81701878 | 2.10522923  |
| C | -0.16764315 | -5.69576468 | 0.72872954  |
| C | -1.49312421 | -5.51644044 | 0.16645246  |
| C | -1.33840456 | -5.33681240 | -1.18018185 |
| C | 0.08283487  | -5.42469917 | -1.47056587 |
| C | 0.68467725  | -5.22684312 | -2.73500413 |
| C | -1.04069037 | -5.71811665 | 3.04710647  |
| C | -3.18262545 | -5.50590794 | 4.85941818  |
| C | -1.41285861 | -6.81283642 | 3.84314795  |
| C | -1.76636739 | -4.52142600 | 3.16081174  |
| C | -2.82730079 | -4.41311997 | 4.06177104  |
| C | -2.47617432 | -6.70792783 | 4.74340163  |
| C | -0.18275760 | -4.74528167 | -3.85168453 |
| C | -1.84117183 | -3.71097545 | -5.88774637 |
| C | -1.27104721 | -5.48924877 | -4.33620357 |
| C | 0.07780516  | -3.48770519 | -4.42769920 |

|    |             |             |             |
|----|-------------|-------------|-------------|
| C  | -0.74144904 | -2.97555052 | -5.43449996 |
| C  | -2.09654971 | -4.97357137 | -5.33993580 |
| C  | 2.06248051  | -5.34012961 | -3.02338722 |
| C  | 2.64914935  | -5.19810647 | -4.34806230 |
| C  | 4.00630457  | -5.27901773 | -4.19854691 |
| C  | 4.26674248  | -5.48060391 | -2.78516813 |
| C  | 5.54642673  | -5.51040713 | -2.20149505 |
| C  | 6.70104524  | -5.17025643 | -3.09083087 |
| C  | 8.88068743  | -4.46225670 | -4.71762969 |
| C  | 7.60451489  | -6.14741459 | -3.52891177 |
| C  | 6.89629407  | -3.83525019 | -3.48162237 |
| C  | 7.98104930  | -3.48060777 | -4.28679987 |
| C  | 8.68812962  | -5.79555323 | -4.34011533 |
| Zn | 2.83190841  | -5.60907189 | -0.02571362 |
| H  | 5.45355327  | -8.19109645 | 4.33988374  |
| H  | 6.57011034  | -4.12219079 | 3.52199859  |
| H  | 8.09391741  | -4.13397125 | 5.48302402  |
| H  | 6.97426271  | -8.21604994 | 6.31271582  |
| H  | 8.29594569  | -6.18351788 | 6.89178024  |
| H  | -0.86135444 | -7.74739474 | 3.74760965  |
| H  | -1.48760385 | -3.67381578 | 2.54035094  |
| H  | -3.37027609 | -3.47518732 | 4.14758132  |
| H  | -2.75467942 | -7.56690450 | 5.35384217  |
| H  | -4.00878909 | -5.42275106 | 5.56512101  |
| H  | -1.46478093 | -6.47698489 | -3.92029524 |
| H  | 0.92343132  | -2.90557345 | -4.06360385 |
| H  | -0.52863316 | -1.99141766 | -5.84927263 |
| H  | -2.94181437 | -5.56114914 | -5.69834850 |
| H  | -2.49758828 | -3.30313302 | -6.65461849 |
| H  | 7.44989144  | -7.18360119 | -3.22946879 |
| H  | 6.19287018  | -3.07219446 | -3.15094587 |

|   |             |             |             |
|---|-------------|-------------|-------------|
| H | 8.12319027  | -2.43843351 | -4.56764860 |
| H | 9.38338253  | -6.56409055 | -4.67780396 |
| H | 9.72929069  | -4.18943706 | -5.34476220 |
| H | 4.76522188  | -5.22501063 | -4.96992326 |
| H | 2.09305459  | -5.07348282 | -5.26886768 |
| H | 0.93115558  | -5.98531830 | 4.88517153  |
| H | 3.58692027  | -6.24108992 | 5.16704672  |
| C | -0.52965253 | 1.42028327  | 3.55164989  |
| O | -0.62902780 | 2.50391523  | 3.93866373  |

### CAT3

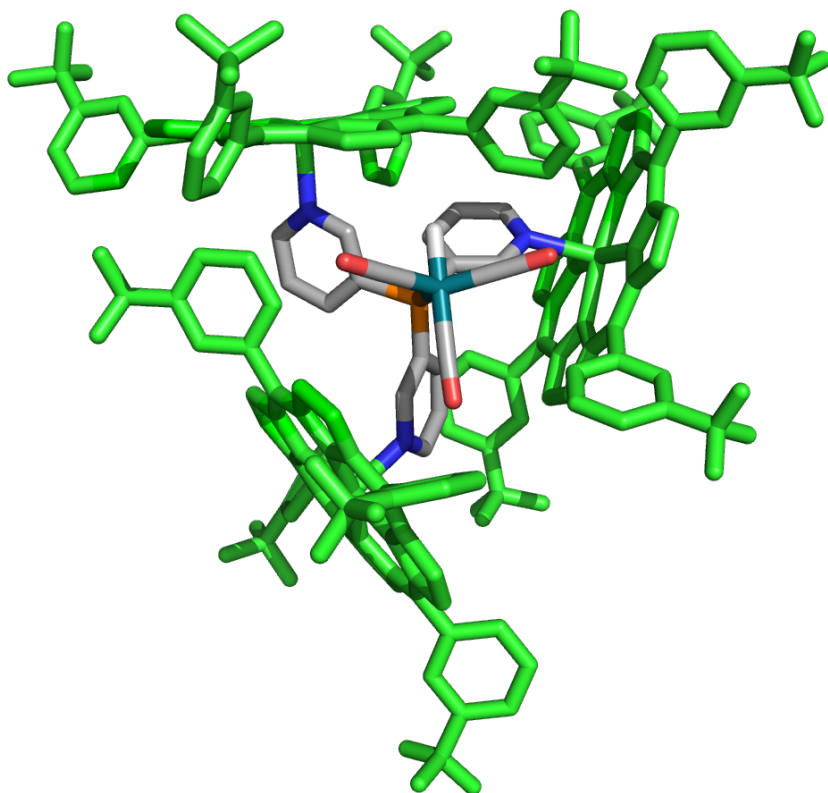

Energy: -45663.28 kcal/mol

|    |             |             |            |
|----|-------------|-------------|------------|
| Rh | -0.28125335 | -0.37804533 | 2.84525355 |
| C  | 0.43381596  | -1.94632764 | 3.84103644 |
| C  | -2.19626567 | -0.94998438 | 2.88013011 |
| P  | 0.04168004  | -0.35850386 | 0.46781770 |
| O  | -3.28663998 | -1.32281573 | 2.87389059 |

|   |             |             |             |
|---|-------------|-------------|-------------|
| O | 0.83840576  | -2.83895542 | 4.44893768  |
| H | 7.78938403  | -5.91001998 | 1.73341434  |
| H | 8.11419104  | -5.59194106 | -0.91554697 |
| C | 1.51701896  | -1.25158291 | -0.21052233 |
| C | 2.45450376  | -0.66112501 | -1.07576737 |
| C | 1.74690280  | -2.57111979 | 0.19886524  |
| C | 3.59333144  | -1.37612393 | -1.44057507 |
| N | 2.84370877  | -3.25731389 | -0.15894208 |
| C | 3.76594847  | -2.66120350 | -0.94043047 |
| C | 0.40043272  | 1.29872899  | -0.25015539 |
| C | -0.18062395 | 1.82167670  | -1.41112301 |
| C | 1.44586469  | 2.01367787  | 0.34766507  |
| C | 0.32474865  | 3.01526154  | -1.93423490 |
| N | 1.95817986  | 3.12912299  | -0.18531957 |
| C | 1.40989403  | 3.62670035  | -1.31270504 |
| C | -1.31766530 | -0.97042071 | -0.61032368 |
| C | -1.12886134 | -1.76650898 | -1.74936887 |
| C | -2.62686983 | -0.61635492 | -0.26478658 |
| C | -2.24835601 | -2.19106449 | -2.46461766 |
| N | -3.70167257 | -1.03191882 | -0.95075416 |
| C | -3.51629085 | -1.82658810 | -2.02548618 |
| H | 1.27049848  | 0.05465123  | 2.81644922  |
| H | -2.39408274 | -5.34013353 | 0.56845832  |
| H | -2.08334270 | -4.89228973 | -2.03489167 |
| H | 1.91066892  | 1.66418121  | 1.26776587  |
| H | 1.86769015  | 4.53011064  | -1.71016521 |
| H | -0.10671298 | 3.45281313  | -2.83132158 |
| H | -1.00889597 | 1.31661562  | -1.90333080 |
| H | -0.13210439 | -2.06194153 | -2.06456193 |
| H | -2.14606651 | -2.80525823 | -3.35063773 |
| H | -4.41257111 | -2.15894422 | -2.54236920 |

|   |             |             |             |
|---|-------------|-------------|-------------|
| H | -2.83345180 | 0.04494861  | 0.57217962  |
| H | 1.03911170  | -3.09505801 | 0.83967129  |
| H | 2.32116153  | 0.35121230  | -1.44373775 |
| H | 4.34030456  | -0.93357197 | -2.09168769 |
| H | 4.65288562  | -3.24753658 | -1.16317178 |
| N | 3.52153711  | 3.30835571  | 2.67337349  |
| N | 4.85908506  | 2.03085648  | 0.42416642  |
| N | 4.55749984  | 4.47530531  | -1.17496116 |
| N | 3.24952188  | 5.77757874  | 1.10083437  |
| C | 2.93631652  | 1.98419940  | 4.47459592  |
| C | 3.64832418  | 2.03936386  | 3.20888857  |
| C | 2.41827772  | 3.22920216  | 4.70094191  |
| C | 2.79209992  | 4.06266725  | 3.57243986  |
| C | 4.34649586  | 0.97008625  | 2.60766681  |
| C | 4.98235003  | 1.01508113  | 1.34762478  |
| C | 5.80919067  | -0.03955005 | 0.78789502  |
| C | 6.12827934  | 0.33334172  | -0.48902609 |
| C | 5.51168856  | 1.62760646  | -0.72256342 |
| C | 4.33877105  | -0.35039945 | 3.29753886  |
| C | 4.18028245  | -2.86927670 | 4.54381402  |
| C | 4.85198809  | -0.53152119 | 4.58610897  |
| C | 3.77768510  | -1.45608243 | 2.63276371  |
| C | 3.69709771  | -2.70130582 | 3.24448390  |
| C | 4.76867934  | -1.78752953 | 5.20303818  |
| C | 5.50083658  | 2.32227343  | -1.94870750 |
| C | 5.04489495  | 3.63691783  | -2.15564087 |
| C | 5.04656722  | 4.33793290  | -3.42708275 |
| C | 4.55745875  | 5.59608925  | -3.19338057 |
| C | 4.25132156  | 5.67893389  | -1.77376568 |
| C | 3.68129071  | 6.79279032  | -1.12140635 |
| C | 5.94668478  | 1.53544085  | -3.14153672 |

|    |             |             |             |
|----|-------------|-------------|-------------|
| C  | 6.71788963  | -0.12409341 | -5.28070076 |
| C  | 7.29995723  | 1.31433663  | -3.40964838 |
| C  | 4.98166383  | 0.93910024  | -3.97040659 |
| C  | 5.36329209  | 0.11490554  | -5.02965660 |
| C  | 7.68182608  | 0.48341231  | -4.47180734 |
| C  | 3.44029472  | 8.01309722  | -1.94671198 |
| C  | 2.95757325  | 10.29079185 | -3.52295433 |
| C  | 4.50996964  | 8.76219971  | -2.44834404 |
| C  | 2.12694588  | 8.41580617  | -2.23648161 |
| C  | 1.88774510  | 9.54619326  | -3.01814069 |
| C  | 4.26763221  | 9.89547428  | -3.23357185 |
| C  | 3.27418191  | 6.84503826  | 0.22822530  |
| C  | 2.77603962  | 8.02723737  | 0.91110201  |
| C  | 2.43777041  | 7.64644300  | 2.18196918  |
| C  | 2.72170638  | 6.22536135  | 2.29259483  |
| C  | 2.44861176  | 5.42194764  | 3.41816075  |
| C  | 1.71517937  | 6.06560627  | 4.54993078  |
| C  | 0.34017932  | 7.24801286  | 6.69894376  |
| C  | 2.36188106  | 6.27286783  | 5.77461719  |
| C  | 0.37543226  | 6.45865159  | 4.40897761  |
| C  | -0.30582945 | 7.04462260  | 5.47812429  |
| C  | 1.67651882  | 6.85821301  | 6.84327511  |
| Zn | 3.86267947  | 3.84970368  | 0.68477547  |
| H  | 5.31745993  | 0.30426407  | 5.10466556  |
| H  | 3.38776447  | -1.31003896 | 1.63349051  |
| H  | 3.24487961  | -3.53714678 | 2.72023162  |
| C  | 5.35163445  | -1.94908953 | 6.58118940  |
| H  | 4.10652379  | -3.83155259 | 5.03634234  |
| H  | 8.05410610  | 1.78082802  | -2.77854690 |
| H  | 3.92731653  | 1.12518306  | -3.76813081 |
| H  | 4.60744359  | -0.34980676 | -5.66180985 |

|   |             |             |             |
|---|-------------|-------------|-------------|
| C | 9.15196877  | 0.24527911  | -4.70005667 |
| H | 7.02031882  | -0.76765183 | -6.10257109 |
| H | 5.53025765  | 8.46237868  | -2.21777562 |
| H | 1.29299290  | 7.83645744  | -1.85040805 |
| H | 0.86360066  | 9.84620737  | -3.23598733 |
| C | 5.44419097  | 10.65453768 | -3.78986054 |
| H | 2.77843205  | 11.17345651 | -4.13209853 |
| H | 3.40078373  | 5.97214182  | 5.88835789  |
| H | -0.13791454 | 6.29349067  | 3.46508528  |
| H | -1.34820823 | 7.33897625  | 5.36112720  |
| H | -0.18767951 | 7.70068204  | 7.53531927  |
| C | 2.40381347  | 7.12289321  | 8.13613507  |
| H | 2.04569494  | 8.26974141  | 2.97650128  |
| H | 2.70842559  | 9.01795636  | 0.47836991  |
| H | 6.73601182  | -0.21469415 | -1.19877722 |
| H | 6.10964153  | -0.94221342 | 1.30469000  |
| H | 2.82801097  | 1.10702927  | 5.09961923  |
| H | 1.81390437  | 3.54681564  | 5.54123219  |
| H | 5.39155295  | 3.92603823  | -4.36866207 |
| H | 4.41752564  | 6.39326947  | -3.91367029 |
| N | -4.95909305 | 1.31809320  | 0.97285039  |
| N | -4.52549781 | 1.65290877  | -1.89366962 |
| N | -6.39625043 | -0.56994612 | -2.44213941 |
| N | -6.79802653 | -0.91224775 | 0.44436890  |
| C | -3.85554987 | 2.74957787  | 2.40875675  |
| C | -4.07268961 | 2.37855489  | 1.02045372  |
| C | -4.59817053 | 1.89765205  | 3.17846433  |
| C | -5.30790691 | 1.01151055  | 2.27547464  |
| C | -3.46464106 | 2.99913181  | -0.09468645 |
| C | -3.69440429 | 2.66106253  | -1.44964699 |
| C | -3.00512453 | 3.23859989  | -2.59382613 |

|   |              |             |             |
|---|--------------|-------------|-------------|
| C | -3.40509868  | 2.54633027  | -3.70363857 |
| C | -4.34769042  | 1.53634437  | -3.25731920 |
| C | -2.43884573  | 4.04680724  | 0.18471313  |
| C | -0.40372927  | 5.95188735  | 0.63978776  |
| C | -2.53093412  | 5.33178012  | -0.36780549 |
| C | -1.33058485  | 3.74864845  | 0.99623532  |
| C | -0.33287397  | 4.68955053  | 1.23179797  |
| C | -1.51217952  | 6.26806265  | -0.15340148 |
| C | -4.93941681  | 0.56869351  | -4.09240743 |
| C | -5.88787551  | -0.40164793 | -3.71404803 |
| C | -6.38976482  | -1.45825037 | -4.57625785 |
| C | -7.19761519  | -2.25275291 | -3.80915646 |
| C | -7.18968050  | -1.69955656 | -2.46610597 |
| C | -7.81797324  | -2.28702463 | -1.34915045 |
| C | -4.45738792  | 0.50859814  | -5.50541243 |
| C | -3.55311602  | 0.31665076  | -8.16242201 |
| C | -5.30410483  | 0.84603407  | -6.56622765 |
| C | -3.15071673  | 0.07491729  | -5.78504222 |
| C | -2.70244792  | -0.01168827 | -7.10340506 |
| C | -4.85600519  | 0.74388493  | -7.88795976 |
| C | -8.68229938  | -3.47571661 | -1.60867786 |
| C | -10.28333650 | -5.72854529 | -2.13116872 |
| C | -9.86609918  | -3.34591394 | -2.34277773 |
| C | -8.30714738  | -4.74394782 | -1.13535500 |
| C | -9.10176147  | -5.86062242 | -1.39606211 |
| C | -10.66074952 | -4.46828320 | -2.60389798 |
| C | -7.66627563  | -1.88368345 | -0.00886267 |
| C | -8.38776038  | -2.44493227 | 1.12055139  |
| C | -7.92999762  | -1.81332439 | 2.24378228  |
| C | -6.92214722  | -0.85719465 | 1.81538666  |
| C | -6.20227636  | -0.00221021 | 2.67204559  |



|    |              |             |             |
|----|--------------|-------------|-------------|
| C  | -6.39733041  | -0.20305162 | 4.13894830  |
| C  | -6.72595263  | -0.58653965 | 6.90805331  |
| C  | -7.01347892  | 0.77927849  | 4.92093338  |
| C  | -5.96042953  | -1.38841831 | 4.75436890  |
| C  | -6.12391941  | -1.57720846 | 6.12642323  |
| C  | -7.17227408  | 0.58961692  | 6.29853199  |
| Zn | -5.53252438  | 0.23341383  | -0.71938265 |
| H  | -3.39966860  | 5.59946921  | -0.96482315 |
| H  | -1.24969856  | 2.75709282  | 1.42489983  |
| H  | 0.51766857   | 4.43301978  | 1.85578298  |
| C  | -1.60106290  | 7.60558521  | -0.83524842 |
| H  | 0.38309043   | 6.68219214  | 0.80005574  |
| H  | -6.31608435  | 1.18540515  | -6.35473731 |
| H  | -2.49982730  | -0.20504920 | -4.95847079 |
| H  | -1.68761489  | -0.34304151 | -7.31769525 |
| C  | -5.81685641  | 1.05766354  | -9.00685498 |
| H  | -3.20974774  | 0.24357440  | -9.19153933 |
| H  | -10.16352960 | -2.36620591 | -2.71111625 |
| H  | -7.38204356  | -4.84562813 | -0.56950234 |
| H  | -8.79869478  | -6.84162894 | -1.03198792 |
| C  | -11.94168775 | -4.28188649 | -3.37548199 |
| H  | -10.90417509 | -6.59624452 | -2.34002093 |
| H  | -7.37319353  | 1.69153652  | 4.44945134  |
| H  | -5.49400427  | -2.15764431 | 4.14374623  |
| H  | -5.77885102  | -2.49809862 | 6.59507657  |
| C  | -7.80799650  | 1.69096928  | 7.10666045  |
| H  | -6.85330422  | -0.72743240 | 7.97857156  |
| H  | -8.26161788  | -1.95861221 | 3.26454067  |
| H  | -9.16179849  | -3.19975534 | 1.05515425  |
| H  | -3.10658346  | 2.71473277  | -4.73147072 |
| H  | -2.31024390  | 4.06509747  | -2.55872978 |

|   |             |             |             |
|---|-------------|-------------|-------------|
| H | -3.22920408 | 3.56057275  | 2.75577508  |
| H | -4.66152384 | 1.88130604  | 4.25924900  |
| H | -6.14234261 | -1.59256976 | -5.62198042 |
| H | -7.72210469 | -3.14916933 | -4.11692664 |
| N | 4.90909971  | -5.75236053 | 0.03912682  |
| N | 2.60210620  | -5.94621180 | 1.84066199  |
| N | 0.78939327  | -5.51928087 | -0.44220694 |
| N | 3.10382740  | -5.42216228 | -2.23971654 |
| C | 7.01639171  | -5.81806853 | 0.98064838  |
| C | 5.58619715  | -5.85968796 | 1.23578368  |
| C | 7.18197497  | -5.66465170 | -0.36852774 |
| C | 5.85558296  | -5.63129288 | -0.95902592 |
| C | 4.99480325  | -5.99110466 | 2.50865273  |
| C | 3.61161194  | -6.06129293 | 2.77872709  |
| C | 3.01875257  | -6.12951073 | 4.10314334  |
| C | 1.66387560  | -6.03191750 | 3.94801765  |
| C | 1.40251481  | -5.91767248 | 2.52508581  |
| C | 5.91665009  | -5.97644457 | 3.68380439  |
| C | 7.58999212  | -5.87764062 | 5.94160341  |
| C | 6.04245106  | -7.09288227 | 4.51776079  |
| C | 6.64985271  | -4.81517064 | 3.98200808  |
| C | 7.47628902  | -4.76640385 | 5.10363442  |
| C | 6.87354175  | -7.04117554 | 5.64266970  |
| C | 0.13001365  | -5.73416414 | 1.94497789  |
| C | -0.14537841 | -5.56175038 | 0.57346368  |
| C | -1.46400081 | -5.33006658 | 0.01454541  |
| C | -1.29977828 | -5.10658166 | -1.32380775 |
| C | 0.11986562  | -5.22696847 | -1.61474781 |
| C | 0.73381764  | -5.02727291 | -2.87380952 |
| C | -1.03870286 | -5.68379752 | 2.87636545  |
| C | -3.22868568 | -5.58820209 | 4.64002865  |

|    |             |             |             |
|----|-------------|-------------|-------------|
| C  | -1.43654787 | -6.83124857 | 3.57293198  |
| C  | -1.75549579 | -4.49187132 | 3.06377916  |
| C  | -2.83980861 | -4.44388582 | 3.94058993  |
| C  | -2.52641808 | -6.78314508 | 4.44819756  |
| C  | -0.10791627 | -4.48984056 | -3.98230312 |
| C  | -1.72606395 | -3.32556392 | -5.98471356 |
| C  | -1.26231605 | -5.14485283 | -4.43699270 |
| C  | 0.23775133  | -3.25845820 | -4.57075287 |
| C  | -0.55596611 | -2.68984639 | -5.56711456 |
| C  | -2.07290186 | -4.55567042 | -5.41261225 |
| C  | 2.10826628  | -5.18873977 | -3.16067369 |
| C  | 2.70002886  | -5.08965154 | -4.48736871 |
| C  | 4.05306324  | -5.22040234 | -4.33628382 |
| C  | 4.30550468  | -5.40399206 | -2.91911572 |
| C  | 5.58074721  | -5.45966289 | -2.32959633 |
| C  | 6.75358646  | -5.22296605 | -3.22809198 |
| C  | 8.99230651  | -4.73995132 | -4.85780510 |
| C  | 7.58301735  | -6.27905385 | -3.61503404 |
| C  | 7.04601654  | -3.92295913 | -3.67236071 |
| C  | 8.15968631  | -3.68378752 | -4.47853742 |
| C  | 8.69628770  | -6.03748931 | -4.42877047 |
| Zn | 2.85901830  | -5.48869388 | -0.16223883 |
| H  | 5.48631955  | -7.99950734 | 4.28963199  |
| H  | 6.54495903  | -3.94235568 | 3.34161783  |
| H  | 8.01623265  | -3.85153972 | 5.34085070  |
| C  | 7.02219618  | -8.27129169 | 6.50006766  |
| H  | 8.22308539  | -5.84024329 | 6.82484747  |
| H  | -0.89667576 | -7.76322535 | 3.42133940  |
| H  | -1.45520182 | -3.60364009 | 2.51469143  |
| H  | -3.38144028 | -3.51255619 | 4.08309876  |
| C  | -2.90825348 | -8.01884624 | 5.22172696  |

|   |              |             |              |
|---|--------------|-------------|--------------|
| H | -4.07448634  | -5.55911763 | 5.32308271   |
| H | -1.52922795  | -6.11287550 | -4.02112448  |
| H | 1.13271162   | -2.74310064 | -4.22516819  |
| H | -0.27179159  | -1.73340923 | -6.00265479  |
| C | -3.38130516  | -5.19992946 | -5.79103465  |
| H | -2.36973040  | -2.87182593 | -6.73362210  |
| H | 7.35596698   | -7.28893890 | -3.27971994  |
| H | 6.39786223   | -3.09781128 | -3.38014027  |
| H | 8.39273984   | -2.67434848 | -4.80543661  |
| C | 9.60134651   | -7.18752545 | -4.78806246  |
| H | 9.86317718   | -4.55744898 | -5.48299093  |
| H | 4.81143831   | -5.21422925 | -5.11008689  |
| H | 2.15063472   | -4.96743973 | -5.41262365  |
| H | 0.91403640   | -6.01313548 | 4.72882509   |
| H | 3.56411254   | -6.21975872 | 5.03408916   |
| C | -0.51747116  | 1.44494504  | 3.59365497   |
| O | -0.61758204  | 2.51764954  | 4.00906250   |
| F | -8.98920195  | 2.11606973  | 6.54730447   |
| F | -8.07813906  | 1.31375997  | 8.39451763   |
| F | -6.98642032  | 2.79785166  | 7.17389471   |
| F | -12.88708315 | -3.61452461 | -2.62812555  |
| F | -12.50107248 | -5.47029468 | -3.76316379  |
| F | -11.74242993 | -3.53391717 | -4.51304092  |
| F | -6.53006771  | 2.20466801  | -8.76078631  |
| F | -5.18484295  | 1.21847316  | -10.21158378 |
| F | -6.73922920  | 0.04596224  | -9.16709336  |
| F | -1.20374321  | 7.51407319  | -2.16378255  |
| F | -0.79428916  | 8.54963332  | -0.25698516  |
| F | -2.87660274  | 8.10472913  | -0.84955135  |
| F | -4.41481318  | -4.67444039 | -5.03463357  |
| F | -3.38325324  | -6.55140138 | -5.57915021  |

|   |             |             |              |
|---|-------------|-------------|--------------|
| F | -3.70721696 | -4.98376822 | -7.10357844  |
| F | 10.37460827 | -6.92153330 | -5.88744964  |
| F | 10.46287093 | -7.48638424 | -3.75346256  |
| F | 8.89258029  | -8.33339444 | -5.05286939  |
| F | -2.16494988 | -8.13413248 | 6.37772430   |
| F | -4.22769218 | -8.00951608 | 5.59778622   |
| F | -2.69664092 | -9.16573301 | 4.49983298   |
| F | 3.02710180  | 8.35256279  | 8.11914921   |
| F | 3.37898870  | 6.18819020  | 8.38055084   |
| F | 1.55790390  | 7.12255597  | 9.21626788   |
| F | 5.82970473  | -8.94027123 | 6.64538119   |
| F | 7.91111138  | -9.16740852 | 5.94605402   |
| F | 7.48146244  | -7.98002765 | 7.75783435   |
| F | 6.71728474  | -1.73866379 | 6.57757239   |
| F | 5.14078992  | -3.19451536 | 7.10484155   |
| F | 4.82432269  | -1.03697779 | 7.46746620   |
| F | 6.04844998  | 9.95611850  | -4.81610897  |
| F | 5.09238680  | 11.87847350 | -4.29355359  |
| F | 6.41289447  | 10.86553428 | -2.83860707  |
| F | 9.84449719  | 1.42019503  | -4.84079878  |
| F | 9.39537645  | -0.51074974 | -5.81930505  |
| F | 9.71862134  | -0.42404679 | -3.63581326. |

# CAT4

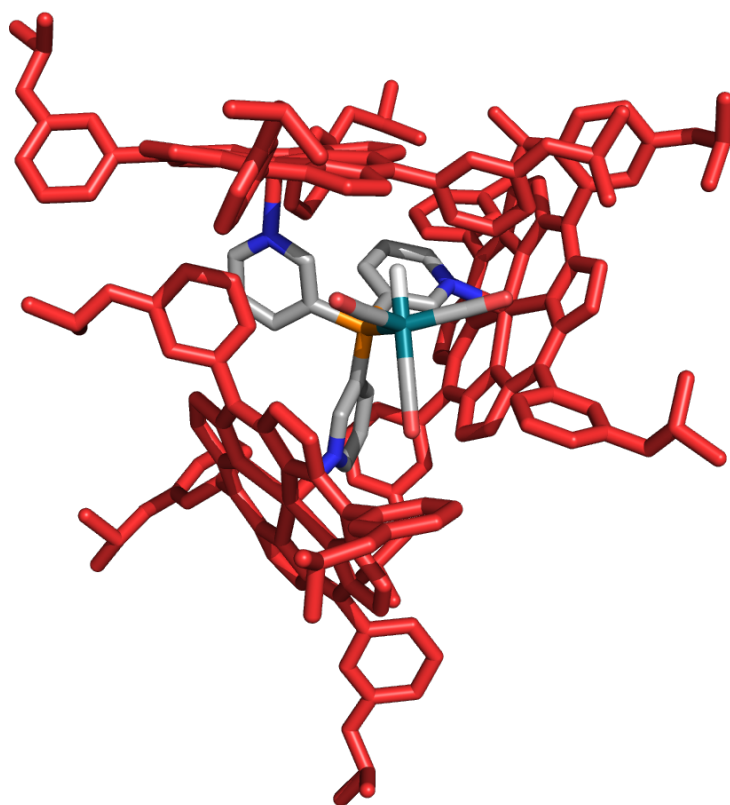

Energy: -55801.234 kcal/mol

|    |             |             |             |
|----|-------------|-------------|-------------|
| Rh | -0.32317551 | -0.24703920 | 2.87032977  |
| C  | 0.43062733  | -1.68067812 | 4.03115401  |
| C  | -2.19307730 | -0.95261360 | 2.72162428  |
| P  | 0.14243500  | -0.23372843 | 0.51039970  |
| O  | -3.24838189 | -1.39305803 | 2.57623468  |
| O  | 0.86217168  | -2.44838553 | 4.77701861  |
| H  | 7.90075767  | -5.15446688 | 1.17883741  |
| H  | 7.97974854  | -5.03419314 | -1.50385579 |
| C  | 1.64020476  | -1.10470149 | -0.14708185 |
| C  | 2.62374060  | -0.47907947 | -0.93110345 |
| C  | 1.81528037  | -2.45953849 | 0.16471074  |
| C  | 3.74113193  | -1.20751878 | -1.33667679 |
| N  | 2.88405872  | -3.16127831 | -0.24368218 |
| C  | 3.84143859  | -2.54287873 | -0.96555334 |

|   |             |             |             |
|---|-------------|-------------|-------------|
| C | 0.49913964  | 1.43884079  | -0.16736738 |
| C | -0.02079873 | 1.95618498  | -1.35914820 |
| C | 1.47761340  | 2.17971926  | 0.50592017  |
| C | 0.47448498  | 3.17420558  | -1.83113386 |
| N | 1.98085226  | 3.32220427  | 0.02431238  |
| C | 1.48765352  | 3.81826981  | -1.12807778 |
| C | -1.17704829 | -0.85168936 | -0.61974756 |
| C | -0.96936428 | -1.74824882 | -1.67829308 |
| C | -2.48644903 | -0.41380122 | -0.37810549 |
| C | -2.07013497 | -2.18399015 | -2.41667302 |
| N | -3.53955468 | -0.83435676 | -1.09350854 |
| C | -3.33721278 | -1.72111282 | -2.08945444 |
| H | 1.19272160  | 0.28525336  | 2.93119564  |
| H | -2.29635562 | -5.20646509 | 0.95172072  |
| H | -2.24257996 | -4.88575330 | -1.68937775 |
| H | 1.89345759  | 1.83260041  | 1.44964353  |
| H | 1.93030951  | 4.74716748  | -1.47952436 |
| H | 0.09319138  | 3.60598221  | -2.75296199 |
| H | -0.79304434 | 1.42773082  | -1.91412896 |
| H | 0.02513429  | -2.11500207 | -1.92081721 |
| H | -1.94661321 | -2.87643540 | -3.23764764 |
| H | -4.22013905 | -2.04700888 | -2.63262612 |
| H | -2.70787423 | 0.31102303  | 0.40163373  |
| H | 1.07823396  | -3.00417676 | 0.75380954  |
| H | 2.54410926  | 0.56647023  | -1.21095132 |
| H | 4.51446934  | -0.73880752 | -1.93727311 |
| H | 4.69511187  | -3.15382304 | -1.24736973 |
| N | 3.38896131  | 3.52234926  | 2.98161701  |
| N | 4.85942871  | 2.30269625  | 0.77746922  |
| N | 4.56126147  | 4.73631876  | -0.82911473 |
| N | 3.15951258  | 5.99996041  | 1.41883366  |

|   |            |             |             |
|---|------------|-------------|-------------|
| C | 2.70868503 | 2.15995911  | 4.72003923  |
| C | 3.48921426 | 2.24284367  | 3.49809721  |
| C | 2.17251576 | 3.39947101  | 4.94113655  |
| C | 2.60535134 | 4.25606214  | 3.85150191  |
| C | 4.21872416 | 1.18995825  | 2.90875979  |
| C | 4.92931628 | 1.27194091  | 1.69113378  |
| C | 5.76222821 | 0.21417607  | 1.15068551  |
| C | 6.12387827 | 0.59057395  | -0.11170351 |
| C | 5.53691852 | 1.89861849  | -0.35602739 |
| C | 4.16495191 | -0.16812153 | 3.52246281  |
| C | 4.06242784 | -2.78003725 | 4.54143975  |
| C | 4.64115764 | -0.43617832 | 4.80724706  |
| C | 3.64122568 | -1.22147920 | 2.74585838  |
| C | 3.59092377 | -2.51078644 | 3.25600222  |
| C | 4.60025149 | -1.74645741 | 5.31617689  |
| C | 5.54013370 | 2.58898934  | -1.58976490 |
| C | 5.06945770 | 3.89931036  | -1.80243144 |
| C | 5.05280010 | 4.58939098  | -3.07903711 |
| C | 4.52199161 | 5.83373410  | -2.85870674 |
| C | 4.21310599 | 5.92305931  | -1.44008018 |
| C | 3.59060802 | 7.02010541  | -0.80262440 |
| C | 5.95956484 | 1.76395997  | -2.76693415 |
| C | 6.60780581 | -0.19701336 | -4.68082932 |
| C | 7.27180563 | 1.29780756  | -2.88930942 |
| C | 4.97643212 | 1.28888850  | -3.65481290 |
| C | 5.31008378 | 0.32180435  | -4.60512366 |
| C | 7.59832821 | 0.30040570  | -3.82033930 |
| C | 3.29339877 | 8.21637511  | -1.64563354 |
| C | 2.75660634 | 10.42389693 | -3.28479845 |
| C | 4.35114570 | 8.96807283  | -2.18199334 |
| C | 1.96545960 | 8.57699241  | -1.91863826 |



|    |             |             |             |
|----|-------------|-------------|-------------|
| C  | 1.71215380  | 9.67762810  | -2.74506314 |
| C  | 4.08909773  | 10.07413924 | -3.00080844 |
| C  | 3.17359977  | 7.06643293  | 0.54473316  |
| C  | 2.62975767  | 8.23473120  | 1.21624082  |
| C  | 2.26751518  | 7.84369820  | 2.47795553  |
| C  | 2.58009617  | 6.42989038  | 2.59430846  |
| C  | 2.25869259  | 5.61377849  | 3.69764038  |
| C  | 1.43486261  | 6.23812732  | 4.77966151  |
| C  | -0.09782755 | 7.41586717  | 6.81898365  |
| C  | 2.00447976  | 6.51088115  | 6.02406393  |
| C  | 0.08291942  | 6.54937632  | 4.55016178  |
| C  | -0.66661523 | 7.12901818  | 5.57214562  |
| C  | 1.25031855  | 7.10349528  | 7.05310824  |
| Zn | 3.80849528  | 4.08816683  | 1.00866334  |
| H  | 5.07830788  | 0.35525164  | 5.41381713  |
| H  | 3.28008157  | -1.00554402 | 1.74947688  |
| H  | 3.17966864  | -3.32084367 | 2.65999833  |
| O  | 5.14330973  | -1.91335608 | 6.57099697  |
| H  | 4.01020203  | -3.79249640 | 4.91150373  |
| H  | 8.04508545  | 1.65108233  | -2.20986272 |
| H  | 3.95238747  | 1.64813177  | -3.56172849 |
| H  | 4.54407140  | -0.05934690 | -5.28107963 |
| O  | 8.90884665  | -0.12516438 | -3.81382356 |
| H  | 6.83697935  | -0.97564077 | -5.40239434 |
| H  | 5.36522421  | 8.66770943  | -1.93855969 |
| H  | 1.14450252  | 8.00864265  | -1.48668975 |
| H  | 0.68594149  | 9.96071295  | -2.97418052 |
| O  | 5.04704996  | 10.86769892 | -3.58645781 |
| H  | 2.56777189  | 11.28389209 | -3.92558117 |
| H  | 3.05044334  | 6.27349573  | 6.21232740  |
| H  | -0.37154671 | 6.33214644  | 3.58788401  |

|   |             |             |             |
|---|-------------|-------------|-------------|
| H | -1.71661457 | 7.36944594  | 5.40210905  |
| H | -0.70925322 | 7.87970243  | 7.58140565  |
| O | 1.96079604  | 7.34296482  | 8.20701371  |
| H | 1.82502346  | 8.44784584  | 3.26083952  |
| H | 2.53892803  | 9.21993865  | 0.77515012  |
| H | 6.73277870  | 0.02812860  | -0.80551135 |
| H | 6.02430402  | -0.70054428 | 1.66527741  |
| H | 2.57618248  | 1.26573681  | 5.31608362  |
| H | 1.52021870  | 3.70564852  | 5.74943933  |
| H | 5.40865601  | 4.17470887  | -4.01534046 |
| H | 4.34937789  | 6.61770440  | -3.58629434 |
| N | -4.96035087 | 1.44171917  | 0.74827592  |
| N | -4.40297767 | 1.84641230  | -2.08454146 |
| N | -6.15240695 | -0.46216781 | -2.75602796 |
| N | -6.67116184 | -0.86805399 | 0.09193968  |
| C | -3.98849138 | 2.88597800  | 2.26434120  |
| C | -4.11136487 | 2.52796303  | 0.86019905  |
| C | -4.74140394 | 1.99490028  | 2.97866861  |
| C | -5.36143765 | 1.09557017  | 2.02521449  |
| C | -3.43357765 | 3.16408342  | -0.20752177 |
| C | -3.58154970 | 2.83352991  | -1.57634290 |
| C | -2.78933873 | 3.38893790  | -2.66286430 |
| C | -3.11444283 | 2.70341926  | -3.80058864 |
| C | -4.11657764 | 1.72181009  | -3.43001830 |
| C | -2.40156633 | 4.18110014  | 0.15429706  |
| C | -0.37162419 | 6.01608899  | 0.79645572  |
| C | -2.41141994 | 5.47192046  | -0.40817962 |
| C | -1.37764252 | 3.83196478  | 1.04597949  |
| C | -0.38221657 | 4.75187706  | 1.37416197  |
| C | -1.38961160 | 6.38061523  | -0.10025946 |
| C | -4.63951454 | 0.75372592  | -4.30583233 |

|    |             |             |             |
|----|-------------|-------------|-------------|
| C  | -5.58750723 | -0.23802250 | -3.99639991 |
| C  | -6.01294558 | -1.27861888 | -4.91326328 |
| C  | -6.81323490 | -2.13385868 | -4.20584370 |
| C  | -6.88726846 | -1.62902276 | -2.84433585 |
| C  | -7.50861948 | -2.29364258 | -1.76305202 |
| C  | -4.04300502 | 0.69001108  | -5.67918625 |
| C  | -2.93969068 | 0.51378797  | -8.24329228 |
| C  | -4.72500488 | 1.24362074  | -6.77127917 |
| C  | -2.81334505 | 0.04778072  | -5.86519535 |
| C  | -2.26879490 | -0.03085355 | -7.15213792 |
| C  | -4.17972313 | 1.15247324  | -8.06077124 |
| C  | -8.20566471 | -3.57851602 | -2.05988428 |
| C  | -9.44789766 | -6.03115843 | -2.66966684 |
| C  | -9.25807423 | -3.63493415 | -2.98399209 |
| C  | -7.78829543 | -4.76433619 | -1.42714274 |
| C  | -8.41332133 | -5.97328382 | -1.73050443 |
| C  | -9.86916562 | -4.85284075 | -3.30198644 |
| C  | -7.45055404 | -1.88831218 | -0.41175041 |
| C  | -8.19074584 | -2.50226240 | 0.67839008  |
| C  | -7.82505518 | -1.85824927 | 1.82865830  |
| C  | -6.85873873 | -0.83962888 | 1.45827772  |
| C  | -6.22325905 | 0.03377899  | 2.36093098  |
| C  | -6.49427428 | -0.19198206 | 3.81484884  |
| C  | -7.02883121 | -0.60247249 | 6.53272840  |
| C  | -7.29096676 | 0.72335287  | 4.51969335  |
| C  | -5.96988105 | -1.31409661 | 4.46725260  |
| C  | -6.23963994 | -1.50746540 | 5.82702976  |
| C  | -7.56246187 | 0.52289303  | 5.87966418  |
| Zn | -5.39501557 | 0.35739864  | -0.97973107 |
| H  | -3.22230665 | 5.73720624  | -1.07847434 |
| H  | -1.35308649 | 2.83073880  | 1.45755872  |

|   |              |             |             |
|---|--------------|-------------|-------------|
| H | 0.40804059   | 4.47155377  | 2.06482802  |
| O | -1.28972281  | 7.66258434  | -0.59847057 |
| H | 0.40437606   | 6.73925487  | 1.02572967  |
| H | -5.67607781  | 1.73236835  | -6.58545058 |
| H | -2.30137588  | -0.39004816 | -5.01099445 |
| H | -1.30866873  | -0.52081570 | -7.31075462 |
| O | -4.76892858  | 1.62983380  | -9.20573213 |
| H | -2.52765912  | 0.45509713  | -9.24956546 |
| H | -9.61639186  | -2.72822966 | -3.46809074 |
| H | -6.96575958  | -4.73043779 | -0.71406813 |
| H | -8.07566315  | -6.89090471 | -1.24816814 |
| O | -10.84620759 | -4.81367023 | -4.28035256 |
| H | -9.90688663  | -6.98589496 | -2.91271086 |
| H | -7.69045548  | 1.57494005  | 3.97904264  |
| H | -5.36294347  | -2.02352775 | 3.91131151  |
| H | -5.83166481  | -2.37729562 | 6.34186370  |
| O | -8.32015117  | 1.36013146  | 6.66492076  |
| H | -7.24931135  | -0.74415166 | 7.58964911  |
| H | -8.18243914  | -2.04045942 | 2.83481181  |
| H | -8.90982190  | -3.30453513 | 0.56914660  |
| H | -2.71293779  | 2.83778656  | -4.79820643 |
| H | -2.06555371  | 4.18163664  | -2.55868876 |
| H | -3.40301923  | 3.70879017  | 2.65251851  |
| H | -4.86793504  | 1.95023926  | 4.05328981  |
| H | -5.72021762  | -1.34910052 | -5.95407717 |
| H | -7.29193547  | -3.03315252 | -4.56494813 |
| N | 4.92295681   | -5.59586992 | -0.27580400 |
| N | 2.79166510   | -5.80318718 | 1.74339959  |
| N | 0.76676821   | -5.48681952 | -0.36135526 |
| N | 2.89810612   | -5.43559695 | -2.36939097 |
| C | 7.07473979   | -5.26299913 | 0.48691239  |

|   |             |             |             |
|---|-------------|-------------|-------------|
| C | 5.69329536  | -5.49914710 | 0.86463363  |
| C | 7.11593037  | -5.21671009 | -0.88109477 |
| C | 5.76322941  | -5.44076192 | -1.36028705 |
| C | 5.22829326  | -5.63720017 | 2.18794597  |
| C | 3.89091488  | -5.85553423 | 2.58005126  |
| C | 3.43076914  | -5.99114599 | 3.95104835  |
| C | 2.06349449  | -5.95946745 | 3.92670086  |
| C | 1.66143418  | -5.83048929 | 2.53661496  |
| C | 6.23232579  | -5.44414863 | 3.28011879  |
| C | 8.08176072  | -5.03877245 | 5.35942206  |
| C | 6.64150167  | -6.51436438 | 4.08384004  |
| C | 6.75065602  | -4.16181141 | 3.52906213  |
| C | 7.67132565  | -3.96663302 | 4.55988127  |
| C | 7.55264901  | -6.31534563 | 5.12722659  |
| C | 0.33678960  | -5.64568780 | 2.08398824  |
| C | -0.06337309 | -5.47723584 | 0.74244239  |
| C | -1.42779284 | -5.24397736 | 0.30700777  |
| C | -1.39728877 | -5.09018307 | -1.05022359 |
| C | -0.01741437 | -5.26434223 | -1.47806377 |
| C | 0.45814963  | -5.22924168 | -2.81142075 |
| C | -0.73755639 | -5.56394374 | 3.12029456  |
| C | -2.72463376 | -5.37605121 | 5.10219105  |
| C | -1.04658960 | -6.67151505 | 3.92152393  |
| C | -1.43855407 | -4.36415615 | 3.31565221  |
| C | -2.42584245 | -4.27340698 | 4.29811373  |
| C | -2.02858157 | -6.57601161 | 4.91101457  |
| C | -0.50772299 | -4.87676111 | -3.89231546 |
| C | -2.45411086 | -3.94602232 | -5.71868508 |
| C | -1.73238457 | -5.53532711 | -4.03024688 |
| C | -0.23166356 | -3.77736628 | -4.73465855 |
| C | -1.19557186 | -3.33715337 | -5.63827529 |

|    |             |             |             |
|----|-------------|-------------|-------------|
| C  | -2.72420048 | -5.05953647 | -4.90672128 |
| C  | 1.80245950  | -5.42322859 | -3.20401850 |
| C  | 2.24685891  | -5.60282778 | -4.57510012 |
| C  | 3.61201809  | -5.68217560 | -4.54917497 |
| C  | 4.02211734  | -5.54417665 | -3.16297394 |
| C  | 5.35754286  | -5.46075169 | -2.71417077 |
| C  | 6.41331503  | -5.34106615 | -3.76030433 |
| C  | 8.38640656  | -5.13463332 | -5.75390486 |
| C  | 7.45726825  | -6.27609100 | -3.82864795 |
| C  | 6.36832943  | -4.29967928 | -4.70273970 |
| C  | 7.33902465  | -4.21300291 | -5.70136982 |
| C  | 8.45286474  | -6.16436545 | -4.80562935 |
| Zn | 2.84778761  | -5.37175114 | -0.28399265 |
| H  | 6.25771424  | -7.51703989 | 3.90177865  |
| H  | 6.41333227  | -3.32342460 | 2.92466173  |
| H  | 8.06197541  | -2.96655769 | 4.75017087  |
| O  | 7.94737004  | -7.42263878 | 5.86968439  |
| H  | 8.81734710  | -4.89573894 | 6.14687732  |
| H  | -0.52367000 | -7.61582337 | 3.78386526  |
| H  | -1.20046471 | -3.50663777 | 2.69480687  |
| H  | -2.96699257 | -3.33998332 | 4.43873454  |
| O  | -2.31559657 | -7.70523377 | 5.66574412  |
| H  | -3.50358900 | -5.31843167 | 5.86066694  |
| H  | -1.96087852 | -6.40565238 | -3.42023005 |
| H  | 0.71649852  | -3.25241418 | -4.63790906 |
| H  | -0.98903188 | -2.47763414 | -6.27095618 |
| O  | -3.91051192 | -5.74405694 | -4.85822294 |
| H  | -3.19675582 | -3.54304913 | -6.39989971 |
| H  | 7.47379681  | -7.11153130 | -3.13427938 |
| H  | 5.56984106  | -3.56442095 | -4.64458875 |
| H  | 7.28643687  | -3.41716894 | -6.44284895 |

|   |              |             |              |
|---|--------------|-------------|--------------|
| O | 9.46420313   | -7.11116441 | -4.91286516  |
| H | 9.15152595   | -5.08095911 | -6.52646000  |
| H | 4.28079930   | -5.84403736 | -5.38367631  |
| H | 1.59464561   | -5.68453578 | -5.43507924  |
| H | 1.38981578   | -5.98936544 | 4.77226986   |
| H | 4.06975998   | -6.07383721 | 4.82011159   |
| C | -0.71442190  | 1.54410580  | 3.62683857   |
| O | -0.88319590  | 2.57856068  | 4.11064147   |
| C | -9.05296633  | 2.45673192  | 6.02287096   |
| C | -12.82501876 | -5.56943791 | -5.37337099  |
| C | -12.82010689 | -5.10211350 | -2.86174478  |
| C | -1.77765835  | 7.50321666  | -2.99836836  |
| C | -2.16476682  | 9.61813422  | -1.62485547  |
| C | -12.04565537 | -5.63837086 | -4.06422911  |
| C | -3.89886167  | -7.89901039 | -3.85043008  |
| C | -6.01604294  | 2.39431198  | -9.09883912  |
| C | -4.15183054  | -9.25457601 | 5.27578636   |
| C | -6.64140639  | 2.33954819  | -10.48922358 |
| C | -5.71541449  | 3.81912331  | -8.63229970  |
| C | -2.20777203  | 8.09311277  | -1.65339327  |
| C | -3.60093904  | -7.26444068 | -6.30011051  |
| C | -4.37046788  | -7.02024773 | -5.00355310  |
| C | -1.83064146  | -9.40207045 | 4.22627418   |
| C | 8.81639087   | -9.27584706 | -3.74120701  |
| C | 10.37306689  | -7.46806279 | -2.85176751  |
| C | 9.88231509   | 0.37328152  | -2.87944583  |
| C | -2.64815880  | -9.13622380 | 5.49158954   |
| C | 8.08951227   | -6.70807065 | 8.24672869   |
| C | 5.84118452   | -7.31350381 | 7.20797823   |
| C | 6.44547491   | 10.69966189 | -3.17554574  |
| C | 9.86849022   | -8.21982208 | -4.08239817  |

|   |              |             |             |
|---|--------------|-------------|-------------|
| C | 1.31169273   | 7.71391986  | 9.47290548  |
| C | 4.38656532   | -0.62056661 | 8.13840292  |
| C | 6.73537242   | 0.25466466  | 7.69281480  |
| C | 7.35023622   | -7.56452353 | 7.21666051  |
| C | 6.65921651   | 11.30624978 | -1.78851748 |
| C | 5.82665972   | -0.96788724 | 7.75294377  |
| C | 7.26977579   | 11.38524192 | -4.26093721 |
| C | 9.47335643   | 0.44191181  | -1.40839386 |
| C | 10.09895908  | 1.74336274  | -3.51063450 |
| C | 0.29463580   | 6.67048506  | 9.94230293  |
| C | 0.80167338   | 9.15866518  | 9.46765018  |
| C | -9.41704681  | 3.41452829  | 7.15262587  |
| C | -10.27613483 | 1.91052206  | 5.28537164  |
| H | -9.99228206  | 1.18099464  | 4.51667166  |
| H | -10.82092502 | 2.73121801  | 4.79696276  |
| H | -10.95036593 | 1.41760496  | 6.00025894  |
| H | -8.37217541  | 2.96753089  | 5.32365890  |
| H | -8.51084966  | 3.77060303  | 7.66013692  |
| H | -10.05643113 | 2.90708074  | 7.88860750  |
| H | -9.96234231  | 4.27979980  | 6.75161026  |
| H | -13.10264103 | -4.05431926 | -3.03785047 |
| H | -12.21171010 | -5.15298143 | -1.94980820 |
| H | -13.73292955 | -5.69021677 | -2.70005371 |
| H | -13.09263691 | -4.52842195 | -5.59908412 |
| H | -13.74810835 | -6.16212356 | -5.29579979 |
| H | -12.22117425 | -5.96421789 | -6.20212642 |
| H | -11.73537406 | -6.67954601 | -3.88283618 |
| H | -3.97821140  | -8.96184792 | -4.11224722 |
| H | -4.50429822  | -7.72143244 | -2.95407918 |
| H | -2.84857163  | -7.68154042 | -3.61193042 |
| H | -5.44990651  | -7.16674766 | -5.15698383 |



|   |             |              |              |
|---|-------------|--------------|--------------|
| H | -3.91643682 | -6.57864400  | -7.09641840  |
| H | -3.76975843 | -8.29531468  | -6.64184832  |
| H | -2.52384746 | -7.12365074  | -6.12931296  |
| H | -0.75707184 | -9.27831750  | 4.42151470   |
| H | -2.12667835 | -8.69938363  | 3.43203414   |
| H | -1.99811521 | -10.43104050 | 3.87279474   |
| H | -2.32908197 | -9.82795554  | 6.29037154   |
| H | -4.40654779 | -10.26212749 | 4.91883423   |
| H | -4.48429956 | -8.52227303  | 4.52604434   |
| H | -4.69015100 | -9.06271200  | 6.21382757   |
| H | -5.07443079 | 4.32034355   | -9.37096603  |
| H | -5.20140821 | 3.82580377   | -7.66286135  |
| H | -6.64903910 | 4.38942728   | -8.53145919  |
| H | -6.67767379 | 1.88035420   | -8.38330418  |
| H | -7.60579308 | 2.86463676   | -10.48954853 |
| H | -6.80527011 | 1.29750918   | -10.79446830 |
| H | -5.97912798 | 2.82079121   | -11.22357362 |
| H | 9.19024698  | 2.35528677   | -3.41726518  |
| H | 10.34534460 | 1.63988832   | -4.57646189  |
| H | 10.92321623 | 2.26046494   | -3.00485384  |
| H | 10.27751305 | 0.89897357   | -0.81885196  |
| H | 9.29577453  | -0.55973608  | -0.99533969  |
| H | 8.55782868  | 1.04074345   | -1.29754391  |
| H | 10.80197363 | -0.21754185  | -2.98712580  |
| H | 7.70617562  | 11.17911188  | -1.47692845  |
| H | 6.01665893  | 10.83161393  | -1.03606154  |
| H | 6.42786017  | 12.38029764  | -1.81663339  |
| H | 6.68177997  | 9.62374323   | -3.17024647  |
| H | 8.34094528  | 11.28640270  | -4.03811496  |
| H | 7.01779051  | 12.45401188  | -4.31197539  |
| H | 7.06912952  | 10.93091845  | -5.24027986  |

|   |             |             |             |
|---|-------------|-------------|-------------|
| H | -2.49913092 | 9.99109930  | -0.64808963 |
| H | -2.81772682 | 10.03129958 | -2.40562278 |
| H | -1.14077300 | 9.97202418  | -1.79736473 |
| H | -3.22480029 | 7.75900118  | -1.39367413 |
| H | -0.76357301 | 7.84037604  | -3.25322169 |
| H | -2.46671470 | 7.82627189  | -3.79242486 |
| H | -1.78337616 | 6.40702545  | -2.97223317 |
| H | 0.62146002  | 9.48144514  | 10.50422412 |
| H | -0.13361263 | 9.28023516  | 8.90993382  |
| H | 1.55930885  | 9.81936528  | 9.02485717  |
| H | 2.17597544  | 7.66963125  | 10.15339620 |
| H | 0.72896523  | 5.66399093  | 9.86848616  |
| H | -0.63607357 | 6.68930004  | 9.36296015  |
| H | 0.04354253  | 6.86488269  | 10.99605211 |
| H | 9.17212532  | -6.88230324 | 8.17867548  |
| H | 7.75558726  | -6.97159480 | 9.26253495  |
| H | 7.88986939  | -5.64138891 | 8.09299315  |
| H | 5.42251044  | -7.55319429 | 8.19692488  |
| H | 5.34014393  | -7.93828733 | 6.45550636  |
| H | 5.61892964  | -6.26086895 | 6.99168841  |
| H | 4.35912006  | -0.21914966 | 9.16252828  |
| H | 3.73219717  | -1.49968867 | 8.09443482  |
| H | 3.98822619  | 0.14156017  | 7.45218355  |
| H | 7.76492045  | -0.04584643 | 7.45670168  |
| H | 6.73072678  | 0.77568884  | 8.65916976  |
| H | 6.38355937  | 0.95125095  | 6.91743813  |
| H | 7.54084002  | -8.62663768 | 7.43006750  |
| H | 6.25505703  | -1.69759907 | 8.45601384  |
| H | 10.84189573 | -8.17212487 | -2.14917908 |
| H | 9.54535305  | -6.97293514 | -2.32935833 |
| H | 11.11527711 | -6.70917900 | -3.13463743 |

|   |             |              |             |
|---|-------------|--------------|-------------|
| H | 9.26946322  | -10.05360777 | -3.10888542 |
| H | 8.43470839  | -9.75095047  | -4.65485490 |
| H | 7.97246885  | -8.84655603  | -3.18761720 |
| H | 10.71531064 | -8.70622694  | -4.58838264 |

### CAT1 with allylbenzene

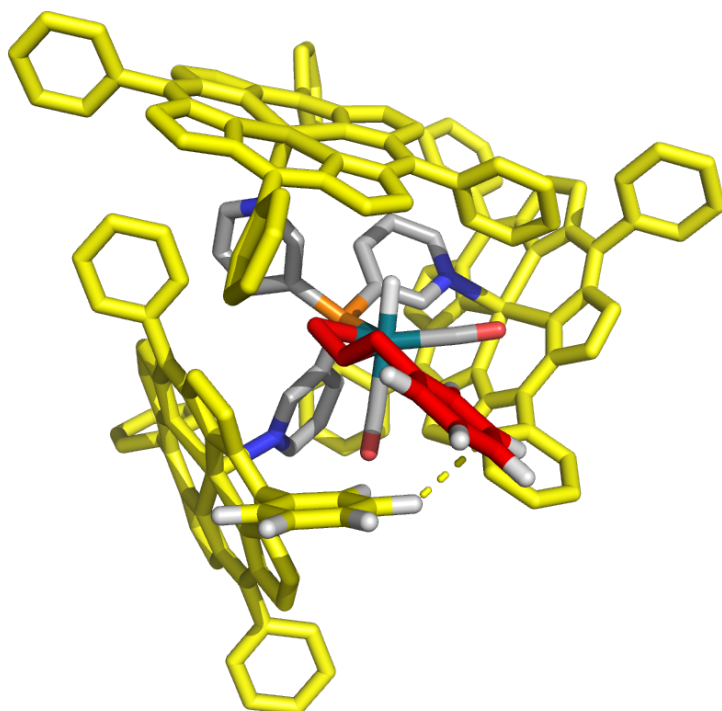

Energy: -43255.17 kcal/mol

|    |             |             |             |
|----|-------------|-------------|-------------|
| Rh | -0.64617531 | -0.35747327 | 2.52840583  |
| C  | 0.17456065  | -1.66525223 | 3.72443930  |
| C  | -2.47336014 | -1.08317972 | 2.25398497  |
| P  | -0.09872108 | -0.26550565 | 0.26019921  |
| O  | -3.54196151 | -1.47782355 | 2.05258930  |
| O  | 0.72615460  | -2.46459978 | 4.35443373  |
| H  | 7.61069665  | -5.92710153 | 1.95553808  |
| H  | 7.85005637  | -5.58336778 | -0.70407270 |
| C  | 1.38592692  | -1.24910411 | -0.24533551 |
| C  | 2.44887121  | -0.71713671 | -0.99382254 |

|   |             |             |             |
|---|-------------|-------------|-------------|
| C | 1.52300861  | -2.55513612 | 0.24977918  |
| C | 3.60829621  | -1.47239526 | -1.16275668 |
| N | 2.63599453  | -3.28369160 | 0.06997876  |
| C | 3.67489763  | -2.73835531 | -0.59568391 |
| C | 0.34586102  | 1.33724195  | -0.53475188 |
| C | -0.01504226 | 1.72321345  | -1.83481085 |
| C | 1.26487821  | 2.13268849  | 0.15864311  |
| C | 0.59771856  | 2.84406690  | -2.39594562 |
| N | 1.87714604  | 3.18940351  | -0.39762668 |
| C | 1.56299557  | 3.53199375  | -1.66225400 |
| C | -1.45057295 | -0.86203996 | -0.82991734 |
| C | -1.41395489 | -2.00267522 | -1.63910023 |
| C | -2.65879441 | -0.15648108 | -0.73729186 |
| C | -2.58338384 | -2.39743038 | -2.29671911 |
| N | -3.77304828 | -0.53549690 | -1.36979921 |
| C | -3.74411615 | -1.65003567 | -2.13238224 |
| H | 0.83157772  | 0.27392418  | 2.70960237  |
| H | -2.60367100 | -5.38780469 | 1.09851978  |
| H | -2.38539510 | -5.18541339 | -1.55150951 |
| H | 1.55965692  | 1.88729731  | 1.17700576  |
| H | 2.10371641  | 4.38096956  | -2.07521411 |
| H | 0.34054391  | 3.17041000  | -3.40121496 |
| H | -0.74646242 | 1.15548000  | -2.40721845 |
| H | -0.50161698 | -2.58252729 | -1.74616735 |
| H | -2.59313586 | -3.27493901 | -2.93400399 |
| H | -4.67839666 | -1.92558652 | -2.61550428 |
| H | -2.74720231 | 0.74435011  | -0.13139113 |
| H | 0.72635480  | -3.02747849 | 0.82240787  |
| H | 2.39874708  | 0.28513413  | -1.40811065 |
| H | 4.46077914  | -1.06806089 | -1.69776194 |
| H | 4.57189932  | -3.34678708 | -0.65991339 |

|   |            |             |             |
|---|------------|-------------|-------------|
| N | 3.11574206 | 3.31306878  | 2.60492337  |
| N | 4.71497944 | 2.18013793  | 0.45691044  |
| N | 4.52561870 | 4.70516753  | -1.03251748 |
| N | 2.95237870 | 5.85827264  | 1.15787617  |
| C | 2.51239506 | 1.91334478  | 4.34066367  |
| C | 3.32791726 | 2.05956361  | 3.14785904  |
| C | 1.81496432 | 3.08044471  | 4.49626876  |
| C | 2.19365149 | 3.95687339  | 3.40465627  |
| C | 4.14130257 | 1.05265934  | 2.59047181  |
| C | 4.83089505 | 1.14707451  | 1.36423767  |
| C | 5.73762222 | 0.14586592  | 0.83295957  |
| C | 6.12664900 | 0.57338767  | -0.40830920 |
| C | 5.46766933 | 1.84615279  | -0.64726564 |
| C | 4.19799798 | -0.25255523 | 3.30737269  |
| C | 4.15314641 | -2.72179779 | 4.64082504  |
| C | 4.74524289 | -0.37052435 | 4.59409926  |
| C | 3.65094937 | -1.38960542 | 2.69401852  |
| C | 3.62543649 | -2.61722704 | 3.35133051  |
| C | 4.72216637 | -1.60195540 | 5.25507018  |
| C | 5.58323793 | 2.61040285  | -1.82833048 |
| C | 5.15026099 | 3.93971498  | -1.99756321 |
| C | 5.29625690 | 4.72918473  | -3.20720301 |
| C | 4.77296854 | 5.96855102  | -2.94652222 |
| C | 4.27211447 | 5.94449729  | -1.58216688 |
| C | 3.58986139 | 7.00364068  | -0.94686302 |
| C | 6.21252278 | 1.91352721  | -2.99128537 |
| C | 7.39086342 | 0.48963891  | -5.11218938 |
| C | 7.49561458 | 2.24947231  | -3.44571924 |
| C | 5.52381666 | 0.86213758  | -3.61935784 |
| C | 6.10744680 | 0.15091436  | -4.67029469 |
| C | 8.08063102 | 1.54201439  | -4.50060816 |

|    |             |             |             |
|----|-------------|-------------|-------------|
| C  | 3.38463641  | 8.25330190  | -1.74358913 |
| C  | 2.95210886  | 10.60373644 | -3.22447792 |
| C  | 4.10377430  | 9.42032385  | -1.44931116 |
| C  | 2.45057322  | 8.27407049  | -2.79078918 |
| C  | 2.23291283  | 9.44199585  | -3.52569391 |
| C  | 3.88874588  | 10.58941386 | -2.18547720 |
| C  | 2.99861610  | 6.96374713  | 0.33297843  |
| C  | 2.18528936  | 8.02120488  | 0.91297719  |
| C  | 1.61267062  | 7.51515834  | 2.04876775  |
| C  | 2.08758679  | 6.15101792  | 2.19422732  |
| C  | 1.67005510  | 5.24724614  | 3.18739488  |
| C  | 0.48327745  | 5.61930044  | 4.02324711  |
| C  | -1.80641408 | 6.09734255  | 5.57956859  |
| C  | 0.60799083  | 6.06110493  | 5.34650981  |
| C  | -0.79919779 | 5.43584779  | 3.48079633  |
| C  | -1.93782779 | 5.66761787  | 4.25478710  |
| C  | -0.53213689 | 6.30089619  | 6.12095555  |
| Zn | 3.65115369  | 3.96155003  | 0.69467940  |
| H  | 5.18306356  | 0.50683543  | 5.06940482  |
| H  | 3.21622045  | -1.28271003 | 1.70823399  |
| H  | 3.17608148  | -3.47972936 | 2.86918649  |
| H  | 5.14827736  | -1.68829039 | 6.25470080  |
| H  | 4.12293619  | -3.67310649 | 5.16366033  |
| H  | 8.03597328  | 3.05818917  | -2.95482438 |
| H  | 4.52004425  | 0.61310475  | -3.27944038 |
| H  | 5.56208422  | -0.66500582 | -5.14455329 |
| H  | 9.08181649  | 1.80759210  | -4.83990328 |
| H  | 7.85036657  | -0.06093488 | -5.93272851 |
| H  | 4.83275769  | 9.40269078  | -0.63974545 |
| H  | 1.88605404  | 7.37107939  | -3.01694971 |
| H  | 1.49922512  | 9.44617055  | -4.33190015 |

|   |             |             |             |
|---|-------------|-------------|-------------|
| H | 4.45601665  | 11.48973862 | -1.94962000 |
| H | 2.78399728  | 11.51553962 | -3.79716716 |
| H | 1.60322367  | 6.20240039  | 5.76724108  |
| H | -0.89784396 | 5.09433472  | 2.45386046  |
| H | -2.92557610 | 5.50721985  | 3.82605405  |
| H | -0.42488049 | 6.64280666  | 7.15041859  |
| H | -2.69371565 | 6.27637880  | 6.18671171  |
| H | 0.92140063  | 8.00679001  | 2.72363639  |
| H | 2.04887794  | 9.00832014  | 0.48769535  |
| H | 6.81291777  | 0.08763356  | -1.09229504 |
| H | 6.03682687  | -0.75859613 | 1.34814756  |
| H | 2.46633261  | 1.02701823  | 4.96048082  |
| H | 1.11052714  | 3.33143641  | 5.27701917  |
| H | 5.74556945  | 4.38182565  | -4.13012187 |
| H | 4.73045338  | 6.82249153  | -3.61205188 |
| N | -4.71925204 | 2.26257609  | 0.11033460  |
| N | -4.39739840 | 2.04953245  | -2.78536116 |
| N | -6.43303300 | -0.08579550 | -2.85418475 |
| N | -6.68154978 | 0.08166983  | 0.06386477  |
| C | -3.70898686 | 4.05099564  | 1.16418956  |
| C | -3.88551069 | 3.34737134  | -0.09345232 |
| C | -4.40217172 | 3.35722289  | 2.11782204  |
| C | -5.05232606 | 2.24381391  | 1.45222190  |
| C | -3.26046828 | 3.68964878  | -1.31134170 |
| C | -3.47023811 | 3.04054537  | -2.54786706 |
| C | -2.69147381 | 3.26256781  | -3.75529696 |
| C | -3.14908005 | 2.38245422  | -4.69988764 |
| C | -4.22426840 | 1.62274099  | -4.08626734 |
| C | -2.28449458 | 4.81450658  | -1.27810673 |
| C | -0.45718707 | 6.95531012  | -1.18299669 |
| C | -2.47894822 | 5.95714701  | -2.07388870 |

|   |              |             |             |
|---|--------------|-------------|-------------|
| C | -1.15788040  | 4.76241216  | -0.44198629 |
| C | -0.25222087  | 5.82054093  | -0.39430836 |
| C | -1.57074700  | 7.01812378  | -2.02786271 |
| C | -4.95161471  | 0.59916458  | -4.72179313 |
| C | -5.98678776  | -0.16882517 | -4.15799363 |
| C | -6.67093920  | -1.25996894 | -4.82860117 |
| C | -7.50681107  | -1.83654576 | -3.90915936 |
| C | -7.33873337  | -1.10759099 | -2.66211062 |
| C | -7.91364111  | -1.47518865 | -1.42701010 |
| C | -4.52879526  | 0.23359698  | -6.11154107 |
| C | -3.71865502  | -0.49281023 | -8.70006688 |
| C | -5.11163658  | 0.84020319  | -7.23101293 |
| C | -3.53639124  | -0.74034739 | -6.29668460 |
| C | -3.13265747  | -1.10142795 | -7.58439004 |
| C | -4.70918451  | 0.47855287  | -8.52069050 |
| C | -8.88277354  | -2.61184286 | -1.44639638 |
| C | -10.69192590 | -4.76309472 | -1.50012812 |
| C | -10.14117457 | -2.46777789 | -2.04986311 |
| C | -8.54018119  | -3.84504214 | -0.87031601 |
| C | -9.43832580  | -4.91478813 | -0.89728676 |
| C | -11.04116703 | -3.53658473 | -2.07552115 |
| C | -7.61391358  | -0.90683802 | -0.17252826 |
| C | -8.23717289  | -1.28314597 | 1.08634267  |
| C | -7.65685420  | -0.52510326 | 2.06591111  |
| C | -6.67752471  | 0.33231867  | 1.41944347  |
| C | -5.90191696  | 1.30682454  | 2.07631054  |
| C | -6.00037746  | 1.36598410  | 3.56662928  |
| C | -6.09732723  | 1.48074002  | 6.37308809  |
| C | -6.62479370  | 2.44403301  | 4.21250409  |
| C | -5.44451131  | 0.33700289  | 4.34348343  |
| C | -5.48990022  | 0.39540223  | 5.73705922  |



|    |              |             |             |
|----|--------------|-------------|-------------|
| C  | -6.67179356  | 2.50172074  | 5.60842161  |
| Zn | -5.42636347  | 0.92711534  | -1.34252798 |
| H  | -3.35795913  | 6.01026478  | -2.71520455 |
| H  | -0.98386563  | 3.87197979  | 0.15685527  |
| H  | 0.62094977   | 5.74767843  | 0.24222497  |
| H  | -1.74051328  | 7.90276517  | -2.64199921 |
| H  | 0.24684547   | 7.78203467  | -1.13812008 |
| H  | -5.88352283  | 1.59482866  | -7.08223440 |
| H  | -3.09228623  | -1.21218507 | -5.42217485 |
| H  | -2.36214578  | -1.85823846 | -7.72490167 |
| H  | -5.16996940  | 0.95460390  | -9.38615097 |
| H  | -3.40496864  | -0.77580639 | -9.70473186 |
| H  | -10.40829877 | -1.50907876 | -2.49323108 |
| H  | -7.56191422  | -3.95735578 | -0.40399071 |
| H  | -9.15850555  | -5.86871680 | -0.45024629 |
| H  | -12.01820817 | -3.41068526 | -2.54184566 |
| H  | -11.39394971 | -5.59652347 | -1.52041464 |
| H  | -7.07430743  | 3.23377849  | 3.61138766  |
| H  | -4.96823036  | -0.50310329 | 3.84404542  |
| H  | -5.03158149  | -0.39399053 | 6.32658353  |
| H  | -7.16050484  | 3.34413813  | 6.09845490  |
| H  | -6.11769205  | 1.53023357  | 7.46092521  |
| H  | -7.88260452  | -0.52262453 | 3.12533623  |
| H  | -9.02870833  | -2.01439689 | 1.19551154  |
| H  | -2.80280260  | 2.25988973  | -5.71967588 |
| H  | -1.90030263  | 3.99355492  | -3.85996054 |
| H  | -3.13412386  | 4.95784354  | 1.29495963  |
| H  | -4.46575838  | 3.57700962  | 3.17504927  |
| H  | -6.51710391  | -1.55101318 | -5.86116707 |
| H  | -8.15534942  | -2.69311015 | -4.04909846 |
| N  | 4.67980613   | -5.79345424 | 0.34975117  |

|   |             |             |             |
|---|-------------|-------------|-------------|
| N | 2.42944615  | -5.92002323 | 2.23103959  |
| N | 0.54742209  | -5.59667838 | -0.00078498 |
| N | 2.79918423  | -5.55419285 | -1.88013782 |
| C | 6.81549963  | -5.84310690 | 1.22529994  |
| C | 5.39505039  | -5.89556430 | 1.52509510  |
| C | 6.93761730  | -5.67673082 | -0.12763142 |
| C | 5.59422213  | -5.65938930 | -0.67728279 |
| C | 4.84475154  | -6.00744984 | 2.81749287  |
| C | 3.47080979  | -6.02349300 | 3.13465393  |
| C | 2.93134330  | -5.99925182 | 4.48214402  |
| C | 1.57679668  | -5.84963631 | 4.37474701  |
| C | 1.25946558  | -5.81186865 | 2.95896314  |
| C | 5.80432710  | -6.03532974 | 3.96263110  |
| C | 7.57704475  | -6.05204781 | 6.14510010  |
| C | 5.93340954  | -7.17897064 | 4.76562331  |
| C | 6.57839549  | -4.90248086 | 4.26108695  |
| C | 7.45663507  | -4.90956995 | 5.34643103  |
| C | 6.81454417  | -7.18776932 | 5.85029068  |
| C | -0.03336654 | -5.63972193 | 2.41951501  |
| C | -0.35348240 | -5.57044503 | 1.04642534  |
| C | -1.69360984 | -5.41509296 | 0.51277048  |
| C | -1.57776931 | -5.31657922 | -0.84625360 |
| C | -0.16595490 | -5.42957620 | -1.17270985 |
| C | 0.39620714  | -5.31825774 | -2.46682702 |
| C | -1.15924137 | -5.46176180 | 3.38665827  |
| C | -3.23847942 | -5.04740201 | 5.23860919  |
| C | -1.52968873 | -6.47865599 | 4.28043440  |
| C | -1.85936605 | -4.24609710 | 3.42216265  |
| C | -2.88694811 | -4.03401026 | 4.34099520  |
| C | -2.56147604 | -6.27161727 | 5.20064358  |
| C | -0.51895994 | -4.97183733 | -3.59502079 |

|    |             |             |             |
|----|-------------|-------------|-------------|
| C  | -2.27050530 | -4.21653801 | -5.67440895 |
| C  | -1.60840648 | -5.78671042 | -3.94664732 |
| C  | -0.30872627 | -3.78576638 | -4.32269120 |
| C  | -1.17157524 | -3.41363045 | -5.35430172 |
| C  | -2.48136718 | -5.40754479 | -4.97002919 |
| C  | 1.76909302  | -5.42156454 | -2.78466625 |
| C  | 2.32398438  | -5.34699289 | -4.12922674 |
| C  | 3.68579261  | -5.37600932 | -4.00526264 |
| C  | 3.98090348  | -5.49282865 | -2.58938446 |
| C  | 5.27484508  | -5.48643467 | -2.03769120 |
| C  | 6.40308807  | -5.15034392 | -2.96206997 |
| C  | 8.54231996  | -4.43737038 | -4.63971914 |
| C  | 7.30474297  | -6.12361444 | -3.41184441 |
| C  | 6.57867725  | -3.81715093 | -3.36816518 |
| C  | 7.64377292  | -3.45940039 | -4.19802841 |
| C  | 8.36801910  | -5.76916277 | -4.24852172 |
| Zn | 2.61949251  | -5.51252199 | 0.20569877  |
| H  | 5.33853059  | -8.06086481 | 4.53035873  |
| H  | 6.46914451  | -4.00907703 | 3.65021877  |
| H  | 8.04241429  | -4.01855841 | 5.57227510  |
| H  | 6.90892759  | -8.08364965 | 6.46387780  |
| H  | 8.26242754  | -6.05806976 | 6.99255758  |
| H  | -1.00470366 | -7.43260582 | 4.24703939  |
| H  | -1.57818593 | -3.46368731 | 2.72643020  |
| H  | -3.40990161 | -3.07962102 | 4.35900590  |
| H  | -2.84038666 | -7.07058087 | 5.88763609  |
| H  | -4.04074014 | -4.88774216 | 5.95879816  |
| H  | -1.76446603 | -6.72189247 | -3.41094174 |
| H  | 0.53135006  | -3.14516981 | -4.05845289 |
| H  | -0.99356302 | -2.48346683 | -5.89161717 |
| H  | -3.32677355 | -6.04728004 | -5.22327652 |

|   |             |             |             |
|---|-------------|-------------|-------------|
| H | -2.96125020 | -3.91754721 | -6.46104345 |
| H | 7.16599838  | -7.15832209 | -3.09975367 |
| H | 5.87573351  | -3.05934511 | -3.02542176 |
| H | 7.77601985  | -2.41792146 | -4.48742722 |
| H | 9.06286778  | -6.53445507 | -4.59433996 |
| H | 9.37644632  | -4.16241370 | -5.28500382 |
| H | 4.42727554  | -5.34530806 | -4.79486534 |
| H | 1.74705016  | -5.29780343 | -5.04398644 |
| H | 0.86117176  | -5.74363415 | 5.17970151  |
| H | 3.51645228  | -6.05456521 | 5.39157568  |
| C | -1.36900861 | 1.71087592  | 5.20094093  |
| C | -1.22821724 | 2.03057366  | 2.67509915  |
| C | -2.63541867 | -1.34766587 | 7.14323634  |
| C | -3.18464272 | -0.74813112 | 8.28271523  |
| C | -3.17217974 | 0.64475689  | 8.39852985  |
| C | -2.60521144 | 1.42855720  | 7.38872511  |
| H | -1.65342019 | -1.03198651 | 5.25826176  |
| H | -2.63758566 | -2.43208645 | 7.03455412  |
| H | -3.62172540 | -1.36122315 | 9.07101360  |
| H | -3.60607620 | 1.12394643  | 9.27640235  |
| H | -2.60359693 | 2.51492458  | 7.48383121  |
| H | -2.92577571 | 1.26515983  | 3.69033508  |
| H | -0.25779803 | 2.51413374  | 2.76565624  |
| H | -1.77613114 | 2.18825239  | 1.75103031  |
| C | -1.87570978 | 1.55026811  | 3.78355247  |
| H | -1.52820633 | 2.76849471  | 5.47846755  |
| H | -0.28419963 | 1.54672805  | 5.22282538  |
| C | -2.03895872 | 0.83994127  | 6.24977019  |
| C | -2.07356100 | -0.55845840 | 6.13765486  |

## References

- 1 G. te Velde, F. M. Bickelhaupt, E. J. Baerends, C. Fonseca Guerra, S. J. A. van Gisbergen, J. G. Snijders and T. Ziegler, *Journal of Computational Chemistry*, 2001, **22**, 931–967.
- 2 C. F. Guerra, J. G. Snijders, G. Velde and E. J. Baerends, *Theor. Chem. Accounts Theory, Comput Model*, 1998, 391–403.
- 3 A. D. Becke, *Physical Review A*, 1988, **38**, 3098–3100.
- 4 C. Lee, W. Yang and R. Parr G., *Phys. Rev. B*, 1988, **37**, 785–789.
- 5 E. Van Lenthe, E. J. Baerends, J. G. Snijders, E. Van Lenthe, E. J. Baerends and J. G. Snijders, *Chem. Phys.*, 1993, **99**, 4597–4610.
- 6 E. Van Lenthe, E. J. Baerends, J. G. Snijders, E. Van Lenthe, E. J. Baerends and J. G. Snijders, *Chem. Phys.*, 1994, **101**, 9783–9792.
- 7 E. Van Lenthe, A. Ehlers, E. Baerends, E. Van Lenthe, A. Ehlers and E. Baerends, *Chem. Phys.*, 1999, **110**, 8943–8953.
